# Supplementary material for: Bioinformatics Data Mining Repurposes the JAK2 (Janus Kinase 2) Inhibitor Fedratinib for Treating Pancreatic Ductal Adenocarcinoma by Reversing the KRAS (Kirsten Rat Sarcoma 2 Viral Oncogene Homolog)-Driven Gene Signature
Source: MDPI journal article supplement (doi:10.3390/jpm10030130), 2020-09-16
Supplement: s1 [file s1]

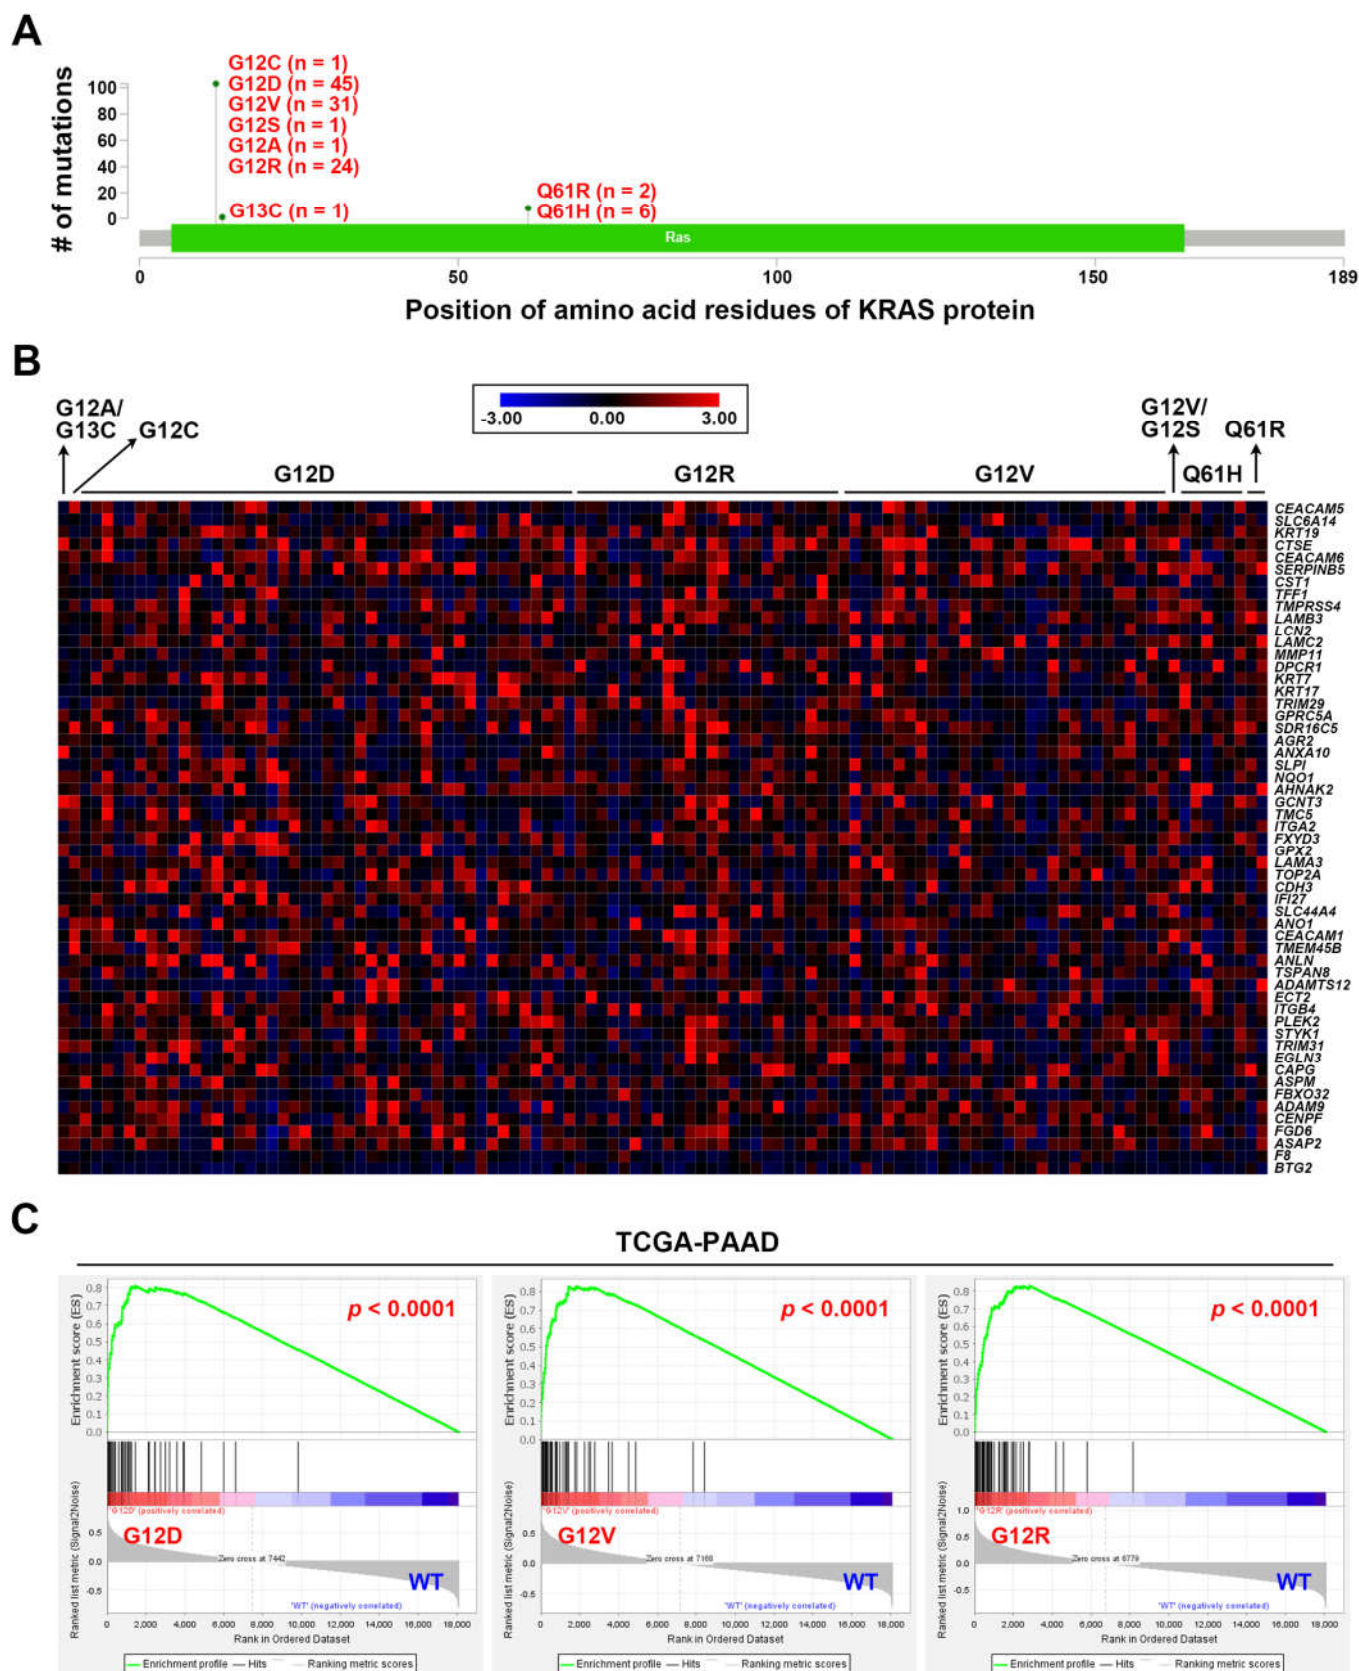

**Figure S1.** Role of *KRAS* mutation types in PDAC gene signature expression. **(A)** Visualization of the *KRAS* mutation burden and hotspots in 168 PDAC patients. The data were obtained from the “Pancreatic adenocarcinoma (TCGA, PanCancer Atlas)” dataset. **(B)** A heat map shows the correlation between *KRAS* mutation types and PDAC gene signature expression. Inset at top: a gradient color key shows the related gene z-scores. **(C)** GSEA results for the role of *KRAS* mutation types in regulating PDAC gene signature. GSEA was performed to enrich the PDAC gene signature in PDAC patients with *KRAS*<sup>G12D/V/R</sup> mutations compared with those with *KRAS*<sup>WT</sup>.
