# Supplementary material for: Bioinformatics Data Mining Repurposes the JAK2 (Janus Kinase 2) Inhibitor Fedratinib for Treating Pancreatic Ductal Adenocarcinoma by Reversing the KRAS (Kirsten Rat Sarcoma 2 Viral Oncogene Homolog)-Driven Gene Signature
Source: J Pers Med. 2020 Sep 16;10(3):130. doi: 10.3390/jpm10030130 (PMC7563462; doi:10.3390/jpm10030130)
Supplement: Supplementary file 1 [file jpm-10-00130-s001.zip › File-S1.xlsx]

## Sheet: GSE15471
ID	adj.P.Val	P.Value	logFC	Gene.symbol
227140_at	9.65e-19	7.06e-23	5.18467	INHBA
210809_s_at	8.21e-15	1.05e-17	5.12461	POSTN
217428_s_at	1.33e-18	1.21e-22	5.04744	COL10A1
1555778_a_at	3.45e-15	3.6e-18	4.89866	POSTN
212353_at	1.66e-19	9.1e-24	4.64841	SULF1
226237_at	3.55e-18	4.54e-22	4.62613	COL8A1
225681_at	6.72e-17	2.49e-20	4.43075	CTHRC1
37892_at	4.13e-15	4.54e-18	4.41625	COL11A1
212354_at	1.31e-19	4.81e-24	4.39716	SULF1
202310_s_at	2.69e-16	1.46e-19	4.25082	COL1A1
202404_s_at	2.52e-16	1.29e-19	4.19574	COL1A2
215646_s_at	1.12e-16	4.52e-20	4.15392	VCAN
202311_s_at	2.89e-15	2.7e-18	4.12965	COL1A1
205941_s_at	4.79e-18	9.61e-22	4.11443	COL10A1
203083_at	1.26e-17	3.68e-21	3.98458	THBS2
227566_at	4.79e-18	7.11e-22	3.95721	LOC102725271
210511_s_at	3.38e-18	3.71e-22	3.93483	INHBA
204619_s_at	1.15e-17	2.94e-21	3.92524	VCAN
211571_s_at	6.64e-17	2.31e-20	3.88427	VCAN
229802_at	2.69e-16	1.47e-19	3.82013	WISP1
221731_x_at	6.72e-17	2.58e-20	3.78007	VCAN
214974_x_at	3.52e-11	2.72e-13	3.75164	CXCL5
204620_s_at	5.2e-17	1.62e-20	3.7374	VCAN
212464_s_at	4.79e-18	1.09e-21	3.72687	FN1
201650_at	3.16e-11	2.41e-13	3.71089	KRT19
221730_at	2.95e-15	2.8e-18	3.70663	COL5A2
211719_x_at	1.2e-17	3.29e-21	3.70279	FN1
223278_at	3.55e-13	1.06e-15	3.6911	GJB2
212344_at	1.31e-19	2.54e-24	3.68941	SULF1
204351_at	9.23e-11	8.74e-13	3.66658	S100P
216442_x_at	4.79e-18	1.14e-21	3.63896	FN1
207173_x_at	5.68e-14	1.12e-16	3.63667	CDH11
210495_x_at	4.79e-18	7.95e-22	3.59053	FN1
205713_s_at	1.6e-14	2.4e-17	3.57454	COMP
204320_at	2.91e-14	5.17e-17	3.54212	COL11A1
212488_at	1.38e-15	1.06e-18	3.49401	COL5A1
203757_s_at	1.39e-08	4.84e-10	3.49365	CEACAM6
204475_at	2.56e-08	1.11e-09	3.49148	MMP1
212489_at	3.62e-15	3.91e-18	3.46146	COL5A1
204051_s_at	4.8e-12	2.26e-14	3.45555	SFRP4
205422_s_at	3.65e-13	1.09e-15	3.44943	ITGBL1
221729_at	4.21e-16	2.62e-19	3.44423	COL5A2
209955_s_at	1.77e-16	8.42e-20	3.38881	FAP
204259_at	6.5e-11	5.85e-13	3.37196	MMP7
206224_at	4.28e-13	1.31e-15	3.34648	CST1
218468_s_at	3.26e-09	7.2e-11	3.3314	GREM1
223121_s_at	3.52e-12	1.56e-14	3.3152	SFRP2
204463_s_at	3.15e-15	3.11e-18	3.31231	EDNRA
221872_at	1.36e-12	5.09e-15	3.30494	RARRES1
211161_s_at	2.93e-14	5.25e-17	3.29494	COL3A1
201852_x_at	8.05e-15	1e-17	3.2936	COL3A1
202859_x_at	4.08e-10	5.44e-12	3.23937	CXCL8
218469_at	8.23e-09	2.38e-10	3.20669	GREM1
204052_s_at	2.33e-11	1.65e-13	3.19937	SFRP4
211657_at	3.73e-08	1.86e-09	3.19876	CEACAM6
229218_at	4.02e-16	2.43e-19	3.19781	COL1A2
232458_at	3.03e-15	2.94e-18	3.12383	COL3A1
211597_s_at	1.27e-12	4.67e-15	3.11154	HOPX
209016_s_at	1.31e-13	3.23e-16	3.1073	KRT7
215446_s_at	4.56e-12	2.11e-14	3.08977	LOX
201666_at	3.52e-16	2.06e-19	3.08903	TIMP1
210095_s_at	1.38e-12	5.21e-15	3.0818	IGFBP3
202437_s_at	2.2e-09	4.36e-11	3.08096	CYP1B1
203789_s_at	6.74e-12	3.51e-14	3.07231	SEMA3C
226777_at	3.05e-11	2.31e-13	3.0648	ADAM12
206392_s_at	2.24e-12	9e-15	3.03475	RARRES1
219773_at	4.79e-18	1.02e-21	3.02767	NOX4
202403_s_at	1.38e-15	1.05e-18	3.02452	COL1A2
205044_at	4.28e-09	1.02e-10	3.01818	GABRP
219795_at	1.67e-09	3.08e-11	3.00994	SLC6A14
200665_s_at	1.04e-13	2.41e-16	3.00861	SPARC
232578_at	2.45e-06	4.89e-07	2.9999	CLDN18
210004_at	1.05e-13	2.47e-16	2.99889	OLR1
219580_s_at	9.86e-09	3.07e-10	2.99862	TMC5
203108_at	1.92e-13	5.24e-16	2.98615	GPRC5A
211430_s_at	3.73e-07	4.35e-08	2.98109	MIR8071-2
218804_at	6.05e-15	7.08e-18	2.97053	ANO1
231766_s_at	1.04e-11	6.13e-14	2.96356	COL12A1
213125_at	2.76e-14	4.7e-17	2.96176	OLFML2B
240304_s_at	1.83e-08	7.02e-10	2.95797	TMC5
223122_s_at	2.09e-10	2.36e-12	2.95276	SFRP2
232231_at	9.52e-11	9.12e-13	2.92839	RUNX2
203325_s_at	6.49e-15	7.72e-18	2.91385	COL5A1
214927_at	4.22e-13	1.29e-15	2.90628	ITGBL1
224694_at	1.02e-15	7.09e-19	2.90418	ANTXR1
205890_s_at	1.7e-11	1.12e-13	2.90162	UBD
205513_at	1.36e-07	1.09e-08	2.9009	TCN1
1557080_s_at	4.1e-12	1.86e-14	2.89799	ITGBL1
212531_at	8.46e-09	2.48e-10	2.8907	LCN2
238617_at	2.41e-15	2.12e-18	2.88916	KIF26B
217028_at	5.29e-08	2.97e-09	2.88468	CXCR4
217762_s_at	1.13e-13	2.72e-16	2.8553	RAB31
209803_s_at	3.46e-12	1.52e-14	2.84973	PHLDA2
204464_s_at	5.97e-14	1.2e-16	2.84211	EDNRA
215076_s_at	1.03e-14	1.39e-17	2.81187	COL3A1
202286_s_at	2.61e-09	5.41e-11	2.79312	TACSTD2
202436_s_at	2.81e-09	5.93e-11	2.77273	CYP1B1
226311_at	2.41e-15	2.09e-18	2.77145	ADAMTS2
228640_at	6.95e-10	1.05e-11	2.76799	PCDH7
201884_at	7.46e-06	1.92e-06	2.76527	CEACAM5
202267_at	1.76e-13	4.71e-16	2.76409	LAMC2
217388_s_at	1.42e-11	8.9e-14	2.7615	KYNU
217763_s_at	8.16e-14	1.72e-16	2.76052	RAB31
221558_s_at	2.24e-10	2.62e-12	2.75343	LEF1
201438_at	3.33e-15	3.41e-18	2.74868	COL6A3
202766_s_at	3.67e-12	1.64e-14	2.72664	FBN1
226930_at	2.35e-13	6.57e-16	2.72629	FNDC1
205927_s_at	3.35e-08	1.62e-09	2.72578	CTSE
217764_s_at	2.18e-13	5.99e-16	2.7125	RAB31
212444_at	1.73e-13	4.59e-16	2.71073	GPRC5A
229554_at	1.34e-13	3.34e-16	2.70972	LUM
201792_at	2.36e-16	1.17e-19	2.70716	AEBP1
202237_at	3.05e-11	2.31e-13	2.69162	LOC101928916
33323_r_at	1.15e-09	1.96e-11	2.68209	SFN
228754_at	3.25e-14	5.95e-17	2.68187	SLC6A6
203021_at	2.79e-14	4.9e-17	2.67459	SLPI
209875_s_at	1.72e-09	3.19e-11	2.67322	SPP1
211959_at	7.7e-15	9.44e-18	2.66673	IGFBP5
212768_s_at	0.000184	7.66e-05	2.66445	OLFM4
204580_at	2.52e-06	5.08e-07	2.66435	MMP12
226695_at	1.61e-12	6.25e-15	2.65735	PRRX1
202856_s_at	1.13e-11	6.8e-14	2.64063	MIR6787
236179_at	9.27e-12	5.29e-14	2.63381	CDH11
225664_at	3.33e-12	1.45e-14	2.63331	COL12A1
231993_at	6.68e-12	3.47e-14	2.62969	ITGBL1
227314_at	4.56e-14	8.5e-17	2.62333	ITGA2
202450_s_at	2.95e-13	8.68e-16	2.61424	CTSK
234994_at	2.86e-11	2.13e-13	2.60097	TMEM200A
211506_s_at	3.81e-08	1.92e-09	2.5967	CXCL8
1554018_at	5.31e-13	1.66e-15	2.57944	GPNMB
230147_at	3.9e-10	5.14e-12	2.57098	F2RL2
225275_at	3.14e-11	2.39e-13	2.55947	EDIL3
209758_s_at	2.15e-09	4.24e-11	2.55793	MFAP5
201860_s_at	1.12e-11	6.76e-14	2.53991	PLAT
212992_at	2.75e-13	7.95e-16	2.53976	AHNAK2
1556499_s_at	6.58e-14	1.34e-16	2.53437	COL1A1
238481_at	5.05e-11	4.3e-13	2.5321	MGP
228335_at	7.07e-09	1.95e-10	2.53168	CLDN11
201069_at	2.67e-13	7.62e-16	2.53058	MMP2
206026_s_at	4.56e-11	3.76e-13	2.51302	TNFAIP6
217728_at	5.8e-12	2.87e-14	2.51199	S100A6
231879_at	4.86e-11	4.09e-13	2.50358	COL12A1
236297_at	3.3e-15	3.32e-18	2.50046	PLXDC2
230493_at	2.05e-14	3.14e-17	2.49685	SHISA2
212143_s_at	1.28e-12	4.72e-15	2.49368	IGFBP3
238455_at	2.42e-15	2.17e-18	2.49299	PLXDC2
213994_s_at	2.36e-09	4.78e-11	2.49291	SPON1
206391_at	1.09e-11	6.5e-14	2.48934	RARRES1
206025_s_at	7.96e-11	7.35e-13	2.48766	TNFAIP6
226865_at	4.03e-13	1.21e-15	2.47659	PLXDC2
205499_at	8.92e-16	6.04e-19	2.47288	SRPX2
219727_at	1.38e-06	2.38e-07	2.47047	DUOX2
227070_at	2.21e-12	8.87e-15	2.46867	GLT8D2
212942_s_at	2.81e-07	2.99e-08	2.45897	CEMIP
212236_x_at	6.74e-13	2.24e-15	2.45586	KRT17
224724_at	1.18e-10	1.2e-12	2.45078	SULF2
207191_s_at	1.17e-13	2.87e-16	2.44669	ISLR
202238_s_at	7.55e-11	6.94e-13	2.44667	LOC101928916
201141_at	1.01e-12	3.49e-15	2.43979	GPNMB
213905_x_at	3.19e-14	5.78e-17	2.43016	BGN
213680_at	1.27e-09	2.21e-11	2.43011	KRT6B
215101_s_at	7.79e-08	5.06e-09	2.4256	CXCL5
201798_s_at	8.21e-15	1.04e-17	2.42276	MYOF
202988_s_at	3.41e-08	1.66e-09	2.42195	RGS1
226997_at	5.56e-17	1.83e-20	2.42053	ADAMTS12
202833_s_at	2.18e-10	2.53e-12	2.4197	SERPINA1
204006_s_at	7.76e-08	5.03e-09	2.41675	FCGR3B
205009_at	0.000106	4.14e-05	2.3991	TFF1
219179_at	1.66e-15	1.34e-18	2.39803	DACT1
206584_at	6.11e-08	3.59e-09	2.39659	LY96
214702_at	3.31e-13	9.82e-16	2.39274	FN1
209596_at	6.59e-14	1.35e-16	2.38763	MXRA5
223484_at	3.18e-09	6.95e-11	2.38497	C15orf48
224396_s_at	5.85e-12	2.93e-14	2.38203	ASPN
202435_s_at	7.13e-09	1.97e-10	2.37492	CYP1B1
229459_at	6.71e-15	8.1e-18	2.36505	FAM19A5
236313_at	3.37e-09	7.5e-11	2.36497	CDKN2B
213765_at	2.29e-08	9.58e-10	2.36383	MFAP5
226545_at	7.32e-12	3.92e-14	2.35811	CD109
211981_at	3.39e-12	1.49e-14	2.3579	COL4A1
223631_s_at	3.06e-07	3.34e-08	2.34746	C19orf33
207172_s_at	2.47e-14	3.98e-17	2.34595	CDH11
211668_s_at	2.11e-11	1.45e-13	2.34196	PLAU
203570_at	1.15e-15	8.2e-19	2.33752	LOXL1
232568_at	1.16e-12	4.2e-15	2.33391	MGC24103
208850_s_at	2.06e-14	3.21e-17	2.33111	THY1
213764_s_at	2.16e-08	8.84e-10	2.32723	MFAP5
204174_at	9.31e-11	8.85e-13	2.32458	ALOX5AP
204855_at	1.31e-07	1.03e-08	2.32054	SERPINB5
209156_s_at	1.09e-10	1.08e-12	2.31622	COL6A2
238017_at	7.1e-08	4.41e-09	2.3152	SDR16C5
211864_s_at	1.5e-15	1.18e-18	2.31381	MYOF
205157_s_at	1.52e-09	2.72e-11	2.30949	KRT17
217767_at	4.74e-10	6.58e-12	2.30941	C3
204602_at	3.9e-10	5.14e-12	2.30662	DKK1
202765_s_at	1.43e-11	8.97e-14	2.30602	FBN1
221911_at	9.65e-14	2.15e-16	2.30345	ETV1
211429_s_at	3.01e-11	2.25e-13	2.30328	SERPINA1
209708_at	2.97e-12	1.28e-14	2.30241	MOXD1
225242_s_at	2.22e-09	4.42e-11	2.30194	CCDC80
203989_x_at	1.63e-12	6.37e-15	2.29559	F2R
201261_x_at	5.56e-15	6.3e-18	2.29437	BGN
202207_at	1.39e-09	2.45e-11	2.28539	ARL4C
205943_at	4.07e-08	2.11e-09	2.28496	TDO2
33322_i_at	1.59e-09	2.88e-11	2.27326	SFN
219087_at	2.29e-12	9.29e-15	2.26366	ASPN
209360_s_at	2.69e-14	4.47e-17	2.26276	LOC101928269
203726_s_at	4.56e-09	1.1e-10	2.25796	LAMA3
202202_s_at	3.43e-09	7.67e-11	2.24851	LAMA4
201105_at	5.62e-12	2.78e-14	2.24792	LGALS1
202411_at	1.87e-09	3.53e-11	2.24278	IFI27
219463_at	2.16e-12	8.62e-15	2.23698	LAMP5
201850_at	1.74e-16	7.98e-20	2.23018	CAPG
201042_at	1.13e-13	2.66e-16	2.22852	TGM2
236044_at	1.8e-11	1.2e-13	2.22632	PLPP4
202363_at	2.79e-14	4.85e-17	2.22614	SPOCK1
205542_at	1.31e-12	4.86e-15	2.22197	STEAP1
209792_s_at	8.1e-10	1.28e-11	2.22112	KLK10
206070_s_at	1.01e-08	3.16e-10	2.2197	EPHA3
219073_s_at	7.05e-10	1.06e-11	2.21385	OSBPL10
220330_s_at	1.44e-06	2.51e-07	2.21127	SAMSN1
37020_at	2.68e-07	2.79e-08	2.20832	CRP
218963_s_at	2.12e-10	2.41e-12	2.20655	KRT23
222904_s_at	1.38e-07	1.13e-08	2.20516	TMC5
211964_at	5.62e-12	2.77e-14	2.20188	COL4A2
201110_s_at	5.44e-08	3.09e-09	2.19997	THBS1
209201_x_at	3.75e-07	4.38e-08	2.19907	CXCR4
212667_at	8.04e-12	4.37e-14	2.19283	SPARC
225710_at	5.95e-10	8.7e-12	2.19017	GNB4
238852_at	9.36e-12	5.44e-14	2.18988	PRRX1
226677_at	2.15e-09	4.22e-11	2.18953	ZNF521
1554474_a_at	1.16e-12	4.17e-15	2.18899	MOXD1
1554899_s_at	3.03e-07	3.3e-08	2.18844	FCER1G
205476_at	2.65e-06	5.39e-07	2.18836	CCL20
210519_s_at	1.48e-08	5.28e-10	2.18712	NQO1
211919_s_at	3.12e-07	3.44e-08	2.18662	CXCR4
235318_at	3.82e-11	3.04e-13	2.18648	FBN1
235821_at	1.03e-14	1.38e-17	2.18643	WISP1
219787_s_at	2.12e-10	2.43e-12	2.18367	ECT2
201058_s_at	1.42e-08	4.97e-10	2.1804	MYL9
206091_at	1.44e-09	2.57e-11	2.17835	MATN3
1558034_s_at	9.4e-08	6.55e-09	2.17632	CP
200907_s_at	1.7e-11	1.11e-13	2.17429	PALLD
228904_at	1.13e-13	2.72e-16	2.17369	HOXB3
211980_at	7.02e-12	3.72e-14	2.17122	COL4A1
231577_s_at	4.19e-07	5.08e-08	2.1675	GBP1
208131_s_at	8.08e-10	1.27e-11	2.16689	PTGIS
222449_at	1.36e-15	9.91e-19	2.16538	PMEPA1
227253_at	2.99e-08	1.38e-09	2.16153	CP
213993_at	1.76e-08	6.63e-10	2.15805	SPON1
227276_at	2.41e-15	2.02e-18	2.15567	PLXDC2
201310_s_at	2.36e-14	3.76e-17	2.15124	NREP
214677_x_at	7.49e-06	1.93e-06	2.14974	IGLC1
209395_at	5.98e-09	1.58e-10	2.14972	CHI3L1
203878_s_at	9.11e-12	5.08e-14	2.14727	MMP11
235521_at	1.47e-12	5.59e-15	2.14547	HOXA3
215176_x_at	0.00011	4.29e-05	2.13981	IGK
210072_at	3.24e-05	1.06e-05	2.13677	CCL19
228141_at	2.51e-14	4.08e-17	2.13461	GPX8
215379_x_at	5.78e-06	1.41e-06	2.13327	IGLV1-44
223475_at	1.34e-09	2.35e-11	2.1316	CRISPLD1
201109_s_at	1.14e-07	8.61e-09	2.12888	THBS1
205681_at	1.4e-06	2.42e-07	2.12788	BCL2A1
202499_s_at	1.36e-07	1.1e-08	2.12117	SLC2A3
204083_s_at	2.71e-09	5.67e-11	2.11889	TPM2
218854_at	4.18e-09	9.91e-11	2.11679	DSE
201012_at	1.27e-09	2.22e-11	2.11302	ANXA1
233555_s_at	5.19e-10	7.34e-12	2.10615	SULF2
209138_x_at	1.83e-05	5.5e-06	2.09996	IGLC1
212657_s_at	6.8e-09	1.86e-10	2.0989	IL1RN
213338_at	5.8e-11	5.1e-13	2.09444	TMEM158
200660_at	1.99e-14	3.02e-17	2.0939	S100A11
205466_s_at	1.5e-09	2.68e-11	2.0939	HS3ST1
215388_s_at	3.85e-10	5.06e-12	2.0935	CFHR1
204298_s_at	2.6e-09	5.38e-11	2.09148	LOX
204971_at	2.97e-08	1.36e-09	2.09054	CSTA
214587_at	1.6e-14	2.4e-17	2.0866	COL8A1
214135_at	2.62e-05	8.32e-06	2.08642	CLDN18
202206_at	1.06e-09	1.79e-11	2.08572	ARL4C
206336_at	1.13e-05	3.12e-06	2.08187	CXCL6
227961_at	2.79e-10	3.41e-12	2.08128	CTSB
212671_s_at	4.24e-07	5.16e-08	2.08119	LOC100509457
203186_s_at	1.38e-09	2.43e-11	2.07545	S100A4
205844_at	2.92e-05	9.41e-06	2.07424	VNN1
201430_s_at	9.21e-12	5.19e-14	2.07228	DPYSL3
214770_at	9.35e-10	1.52e-11	2.07101	MSR1
205525_at	6.68e-11	6.08e-13	2.06874	CALD1
202831_at	6.17e-06	1.52e-06	2.06753	GPX2
1555229_a_at	9.01e-09	2.7e-10	2.06478	C1S
212998_x_at	5.49e-07	7.28e-08	2.064	LOC101060835
212067_s_at	1.34e-11	8.26e-14	2.06079	C1R
209598_at	9.51e-11	9.08e-13	2.06026	PNMA2
213241_at	2.06e-09	4.01e-11	2.05867	PLXNC1
34210_at	3.65e-05	1.22e-05	2.05851	CD52
235371_at	3.96e-11	3.17e-13	2.05813	GXYLT2
203561_at	1.39e-10	1.46e-12	2.05778	FCGR2A
218729_at	5.18e-12	2.48e-14	2.05046	LXN
205479_s_at	2.69e-11	1.99e-13	2.05029	PLAU
203903_s_at	1.09e-06	1.77e-07	2.04989	HEPH
209173_at	0.000128	5.12e-05	2.04964	AGR2
231240_at	2.89e-13	8.46e-16	2.04863	DIO2
205269_at	2.86e-06	5.94e-07	2.04712	LCP2
208965_s_at	4.88e-08	2.69e-09	2.04112	IFI16
1555745_a_at	0.000453	0.00021	2.03901	LYZ
238478_at	5.83e-11	5.14e-13	2.03513	BNC2
205991_s_at	2.5e-11	1.81e-13	2.03484	PRRX1
201721_s_at	4.42e-08	2.37e-09	2.03417	LAPTM5
229947_at	1.79e-08	6.82e-10	2.0326	PI15
207714_s_at	1.51e-13	3.8e-16	2.0264	SERPINH1
201431_s_at	8.5e-12	4.65e-14	2.01701	DPYSL3
228933_at	2.78e-14	4.78e-17	2.01354	NHS
210143_at	9.12e-05	3.47e-05	2.00705	ANXA10
201309_x_at	1.25e-12	4.56e-15	2.00443	NREP
200897_s_at	1.11e-10	1.1e-12	2.00189	PALLD
202504_at	2.88e-10	3.55e-12	2.00086	TRIM29
205206_at	7.69e-13	2.57e-15	2.0006	ANOS1
209949_at	3.83e-09	8.85e-11	1.99845	NCF2
204439_at	9.2e-10	1.49e-11	1.99737	IFI44L
221900_at	2.48e-13	6.99e-16	1.99559	COL8A2
225481_at	2.5e-11	1.81e-13	1.99533	FRMD6
1558199_at	5.19e-11	4.46e-13	1.99469	FN1
221132_at	7.49e-05	2.77e-05	1.99378	CLDN18
203417_at	1.02e-14	1.35e-17	1.98821	MFAP2
213817_at	2.36e-08	9.98e-10	1.98775	IRAK3
219789_at	2.97e-09	6.37e-11	1.98467	NPR3
226676_at	8.67e-10	1.39e-11	1.98197	ZNF521
235944_at	4.69e-10	6.47e-12	1.97974	HMCN1
201925_s_at	1.7e-08	6.33e-10	1.96983	CD55
208747_s_at	1.41e-11	8.77e-14	1.9688	C1S
202628_s_at	5.85e-07	7.94e-08	1.96506	SERPINE1
235182_at	5.03e-10	7.09e-12	1.96398	ISM1
218960_at	2.04e-07	1.93e-08	1.96373	TMPRSS4
220088_at	4.87e-08	2.69e-09	1.96201	C5AR1
203876_s_at	2.98e-09	6.38e-11	1.96178	MMP11
205249_at	6.64e-09	1.79e-10	1.96138	EGR2
216834_at	6.76e-08	4.13e-09	1.96108	RGS1
214511_x_at	8.75e-10	1.4e-11	1.95981	FCGR1B
221898_at	1.5e-12	5.75e-15	1.95888	PDPN
227475_at	1.99e-07	1.86e-08	1.9564	FOXQ1
205239_at	2.33e-06	4.6e-07	1.95575	AREG
213869_x_at	1.25e-14	1.8e-17	1.95501	THY1
218802_at	5.02e-08	2.78e-09	1.95421	MCUB
219607_s_at	2.48e-06	4.98e-07	1.95415	MS4A4A
204472_at	1.56e-08	5.66e-10	1.95358	GEM
32128_at	5.56e-06	1.34e-06	1.9504	CCL18
226875_at	2.49e-07	2.52e-08	1.949	DOCK11
204714_s_at	3.81e-09	8.76e-11	1.94876	F5
205234_at	1.87e-09	3.53e-11	1.94493	SLC16A4
229635_at	1.07e-12	3.75e-15	1.94316	LINC01094
230722_at	9.98e-11	9.61e-13	1.94233	BNC2
210933_s_at	1.07e-08	3.42e-10	1.9422	FSCN1
202949_s_at	3.81e-10	4.96e-12	1.94084	FHL2
227300_at	6.74e-10	1.01e-11	1.93674	TMEM119
226142_at	8.14e-08	5.36e-09	1.93592	GLIPR1
200974_at	2.91e-09	6.2e-11	1.93572	ACTA2
212588_at	1.83e-05	5.5e-06	1.93018	PTPRC
214807_at	1.41e-13	3.54e-16	1.92858	PLXDC2
225524_at	2.67e-10	3.25e-12	1.92808	ANTXR2
204122_at	1.01e-07	7.21e-09	1.92563	TYROBP
229030_at	9.82e-07	1.55e-07	1.92472	CAPN8
214247_s_at	7.45e-14	1.54e-16	1.92342	DKK3
200906_s_at	5.95e-11	5.27e-13	1.92308	PALLD
209211_at	1.63e-06	2.94e-07	1.92213	KLF5
206858_s_at	1.1e-09	1.86e-11	1.92102	HOXC6
202803_s_at	1.45e-08	5.11e-10	1.92042	ITGB2
212865_s_at	7.21e-07	1.04e-07	1.92027	COL14A1
219700_at	1.64e-13	4.19e-16	1.9185	PLXDC1
207691_x_at	5.76e-10	8.4e-12	1.91619	ENTPD1
218002_s_at	8.51e-06	2.24e-06	1.91555	CXCL14
210845_s_at	1.66e-11	1.07e-13	1.9152	PLAUR
202668_at	3.49e-08	1.7e-09	1.9145	EFNB2
201616_s_at	1.33e-10	1.36e-12	1.91404	CALD1
211958_at	1.65e-13	4.27e-16	1.91329	IGFBP5
207850_at	1.04e-07	7.6e-09	1.91279	CXCL3
202269_x_at	1.1e-06	1.81e-07	1.90954	GBP1
225328_at	5.28e-12	2.55e-14	1.90501	FBXO32
232914_s_at	2.07e-09	4.05e-11	1.90429	SYTL2
201617_x_at	3.36e-10	4.3e-12	1.90308	CALD1
202391_at	7.28e-08	4.6e-09	1.90258	BASP1
204846_at	2.5e-07	2.53e-08	1.90185	CP
202627_s_at	2.56e-07	2.61e-08	1.9011	SERPINE1
202357_s_at	9.47e-10	1.54e-11	1.89991	CFB
235616_at	9.23e-11	8.76e-13	1.89988	TSHZ2
206199_at	5.47e-06	1.32e-06	1.89456	CEACAM7
201506_at	7.08e-10	1.07e-11	1.89345	TGFBI
222549_at	1.67e-07	1.46e-08	1.89255	CLDN1
206638_at	2.69e-07	2.8e-08	1.89228	HTR2B
213790_at	2.93e-08	1.33e-09	1.89044	ADAM12
204959_at	1.92e-07	1.77e-08	1.88984	MNDA
211924_s_at	6.35e-11	5.69e-13	1.88941	PLAUR
218181_s_at	5.85e-12	2.92e-14	1.88799	MAP4K4
227266_s_at	5.89e-06	1.44e-06	1.88783	FYB
225782_at	2.09e-09	4.07e-11	1.8876	MSRB3
232090_at	5e-10	7.05e-12	1.88699	DNM3OS
225381_at	1.27e-09	2.2e-11	1.8853	MIR100HG
242625_at	4.63e-11	3.84e-13	1.88437	RSAD2
205997_at	3.7e-09	8.46e-11	1.8832	ADAM28
219778_at	7.62e-09	2.16e-10	1.8812	ZFPM2
229271_x_at	1.24e-07	9.68e-09	1.88114	COL11A1
214453_s_at	1.42e-10	1.5e-12	1.87978	IFI44
211966_at	9.27e-12	5.29e-14	1.87797	COL4A2
228750_at	4.52e-06	1.04e-06	1.87719	COL14A1
210895_s_at	6.35e-08	3.77e-09	1.8759	CD86
227995_at	4.24e-12	1.93e-14	1.87088	PLXDC2
208966_x_at	5.7e-09	1.47e-10	1.87084	IFI16
228617_at	8.07e-10	1.27e-11	1.87054	XAF1
202729_s_at	7.88e-16	5.19e-19	1.86952	LTBP1
219479_at	6.6e-13	2.16e-15	1.86816	KDELC1
219890_at	1.6e-10	1.73e-12	1.86808	CLEC5A
226084_at	4.61e-10	6.32e-12	1.86707	MAP1B
231964_at	3.85e-10	5.05e-12	1.86697	BICD1
1555630_a_at	2.7e-11	2e-13	1.86563	NARR
209474_s_at	2.94e-10	3.64e-12	1.86478	ENTPD1
208268_at	1e-07	7.18e-09	1.86173	ADAM28
203305_at	4.89e-07	6.24e-08	1.86118	F13A1
210670_at	0.016	0.0105	1.85931	PPY
205907_s_at	2.71e-07	2.84e-08	1.85858	OMD
222108_at	2.79e-12	1.19e-14	1.85829	AMIGO2
202664_at	2.07e-07	1.97e-08	1.85591	WIPF1
207719_x_at	2.45e-11	1.75e-13	1.85477	CEP170P1
202478_at	2.33e-10	2.76e-12	1.85306	TRIB2
202196_s_at	9.36e-13	3.19e-15	1.85141	DKK3
217022_s_at	8.99e-05	3.42e-05	1.84824	IGHA2
219508_at	5.28e-05	1.86e-05	1.84782	GCNT3
205668_at	2.14e-06	4.13e-07	1.84712	LY75
214581_x_at	5.99e-12	3.04e-14	1.84684	TNFRSF21
203001_s_at	1.41e-07	1.16e-08	1.84609	STMN2
205483_s_at	3.32e-10	4.2e-12	1.84431	ISG15
205597_at	9.08e-06	2.42e-06	1.84268	SLC44A4
226621_at	1.59e-10	1.72e-12	1.8416	OSMR
208782_at	5.26e-11	4.56e-13	1.84068	FSTL1
210889_s_at	2.17e-08	8.86e-10	1.8395	FCGR2B
215121_x_at	1.07e-05	2.94e-06	1.83923	CYAT1
216235_s_at	1.24e-14	1.75e-17	1.83821	EDNRA
201108_s_at	1.66e-08	6.12e-10	1.83455	THBS1
230836_at	5.31e-07	6.98e-08	1.8328	ST8SIA4
204614_at	7.69e-08	4.96e-09	1.83245	SERPINB2
213537_at	7.85e-07	1.17e-07	1.82828	HLA-DPA1
233814_at	5.99e-11	5.31e-13	1.82803	EFNA5
205529_s_at	1.03e-09	1.72e-11	1.82715	RUNX1T1
241762_at	2.64e-11	1.94e-13	1.82697	FBXO32
206332_s_at	1.03e-08	3.24e-10	1.82595	IFI16
1555564_a_at	2.49e-09	5.1e-11	1.82348	CFI
225646_at	1.32e-08	4.5e-10	1.82133	CTSC
203741_s_at	6.38e-09	1.7e-10	1.82036	ADCY7
232024_at	6.43e-06	1.6e-06	1.81821	GIMAP2
205330_at	6.62e-10	9.9e-12	1.81768	MN1
202381_at	3.2e-11	2.46e-13	1.81699	ADAM9
202952_s_at	4.08e-08	2.12e-09	1.81574	ADAM12
1568574_x_at	1.53e-08	5.5e-10	1.81422	SPP1
226435_at	8.05e-07	1.21e-07	1.81102	PAPLN
204137_at	5.14e-10	7.27e-12	1.80995	GPR137B
209651_at	1.06e-09	1.77e-11	1.80994	TGFB1I1
232164_s_at	1.02e-07	7.36e-09	1.80935	EPPK1
201147_s_at	8.72e-11	8.16e-13	1.80741	TIMP3
208555_x_at	4.08e-10	5.44e-12	1.80213	CST2
220356_at	6.57e-09	1.77e-10	1.80042	CORIN
202489_s_at	9.25e-07	1.44e-07	1.80034	FXYD3
202273_at	5.76e-14	1.15e-16	1.79856	PDGFRB
202820_at	2.25e-11	1.57e-13	1.79761	AHR
202270_at	3.93e-06	8.78e-07	1.79651	GBP1
213566_at	5.58e-08	3.19e-09	1.79496	RNASE6
209270_at	1.58e-08	5.76e-10	1.79451	LAMB3
218638_s_at	7.66e-14	1.6e-16	1.79336	LOC100130872
201743_at	4.35e-08	2.32e-09	1.7902	CD14
209732_at	2.78e-07	2.94e-08	1.78954	CLEC2B
225464_at	5.03e-11	4.27e-13	1.78913	FRMD6
222547_at	3.44e-10	4.41e-12	1.7882	MAP4K4
200832_s_at	3.6e-08	1.78e-09	1.78752	SCD
222235_s_at	4e-12	1.81e-14	1.78695	CSGALNACT2
209436_at	3.87e-08	1.97e-09	1.78622	SPON1
210982_s_at	9.16e-07	1.42e-07	1.78436	HLA-DRA
205680_at	4.42e-06	1.01e-06	1.78345	MMP10
243764_at	1.8e-05	5.4e-06	1.78321	VSIG1
209114_at	1.16e-07	8.84e-09	1.78294	TSPAN1
204114_at	1.78e-10	1.97e-12	1.78046	NID2
219090_at	9.65e-14	2.22e-16	1.78044	SLC24A3
201645_at	0.000139	5.6e-05	1.77884	TNC
218084_x_at	2.79e-10	3.42e-12	1.77808	FXYD5
212233_at	8.08e-10	1.27e-11	1.77671	MAP1B
204232_at	5.53e-07	7.37e-08	1.77648	FCER1G
225647_s_at	4.9e-07	6.26e-08	1.77615	CTSC
228964_at	1.86e-06	3.46e-07	1.77489	PRDM1
211896_s_at	3.06e-08	1.42e-09	1.77303	DCN
225295_at	9.98e-11	9.62e-13	1.77279	SLC39A10
227061_at	2.89e-07	3.1e-08	1.77078	LINC01279
227059_at	4.66e-10	6.41e-12	1.76995	GPC6
213194_at	7.75e-10	1.2e-11	1.76943	ROBO1
205729_at	4.5e-09	1.09e-10	1.76827	OSMR
244056_at	3.27e-08	1.56e-09	1.76665	SFTA2
203820_s_at	6.64e-08	4.02e-09	1.76527	IGF2BP3
227230_s_at	7.67e-07	1.13e-07	1.76496	KIAA1211
225021_at	9.31e-12	5.36e-14	1.76478	ZNF532
204679_at	1.94e-08	7.56e-10	1.76467	KCNK1
228827_at	2.29e-09	4.57e-11	1.76334	RUNX1T1
225353_s_at	3.91e-06	8.72e-07	1.76318	C1QC
238577_s_at	1.52e-09	2.73e-11	1.76298	TSHZ2
1555756_a_at	8.97e-07	1.38e-07	1.76156	CLEC7A
213943_at	1.31e-08	4.48e-10	1.76062	TWIST1
228128_x_at	4.86e-10	6.77e-12	1.75971	PAPPA
1556821_x_at	1.26e-06	2.12e-07	1.75788	DLEU2
215193_x_at	5.23e-07	6.82e-08	1.75713	LOC101060835
201843_s_at	5.81e-08	3.37e-09	1.75532	EFEMP1
224941_at	9.47e-10	1.55e-11	1.75528	PAPPA
201744_s_at	7.61e-11	7.02e-13	1.75493	LUM
212012_at	2.88e-08	1.3e-09	1.75465	PXDN
227628_at	6.62e-13	2.19e-15	1.75319	GPX8
222450_at	1.55e-11	9.89e-14	1.7531	PMEPA1
201667_at	2.41e-08	1.03e-09	1.75172	GJA1
202953_at	8.52e-06	2.24e-06	1.75049	C1QB
230071_at	1.03e-09	1.72e-11	1.74829	SEP11
201162_at	1.85e-11	1.24e-13	1.74677	IGFBP7
223949_at	1.29e-08	4.35e-10	1.74664	TMPRSS3
213139_at	5.07e-09	1.27e-10	1.74459	SNAI2
223204_at	3.01e-10	3.75e-12	1.74331	FAM198B
244780_at	5.98e-09	1.57e-10	1.7427	SGPP2
206023_at	1.21e-07	9.3e-09	1.74171	NMU
209719_x_at	2.27e-05	7.05e-06	1.7398	SERPINB3
222484_s_at	1.76e-05	5.23e-06	1.73965	CXCL14
227609_at	5.69e-08	3.28e-09	1.73909	EPSTI1
200600_at	4.08e-09	9.57e-11	1.739	MSN
227051_at	2.42e-10	2.88e-12	1.73635	BACE2
205076_s_at	2.59e-08	1.13e-09	1.73579	MTMR11
226834_at	1.1e-06	1.79e-07	1.73426	CLMP
226609_at	1.29e-14	1.89e-17	1.73398	DCBLD1
210139_s_at	6.04e-09	1.59e-10	1.7335	PMP22
206439_at	0.000132	5.3e-05	1.73276	EPYC
211991_s_at	1.14e-06	1.89e-07	1.73273	HLA-DPA1
205547_s_at	1.23e-08	4.12e-10	1.73224	TAGLN
212764_at	4.69e-10	6.49e-12	1.73147	ZEB1
1555728_a_at	2.38e-06	4.72e-07	1.72872	MS4A4A
205404_at	1.1e-11	6.62e-14	1.72697	HSD11B1
243940_at	1.84e-09	3.46e-11	1.72444	TSHZ2
212646_at	3.01e-08	1.39e-09	1.7242	RFTN1
222608_s_at	1.58e-06	2.82e-07	1.72383	ANLN
225803_at	9.65e-14	2.18e-16	1.7236	FBXO32
219612_s_at	8.31e-05	3.12e-05	1.72317	FGG
228608_at	3.78e-09	8.69e-11	1.72315	NALCN
201416_at	1.65e-13	4.33e-16	1.71825	SOX4
213422_s_at	1.18e-14	1.64e-17	1.71813	MXRA8
242907_at	9.63e-07	1.52e-07	1.71745	GBP2
215034_s_at	4.76e-11	3.99e-13	1.71595	TM4SF1
204170_s_at	5.05e-06	1.19e-06	1.71485	CKS2
209396_s_at	1.76e-07	1.56e-08	1.71437	CHI3L1
203691_at	2.88e-07	3.09e-08	1.71387	PI3
202902_s_at	1.58e-06	2.83e-07	1.71271	CTSS
218224_at	5.28e-10	7.52e-12	1.71233	PNMA1
228531_at	2.15e-09	4.24e-11	1.71161	SAMD9
1555326_a_at	2.19e-10	2.53e-12	1.71106	ADAM9
216576_x_at	0.000866	0.000428	1.71028	IGK
225056_at	2.42e-09	4.96e-11	1.70946	SIPA1L2
202834_at	1.02e-10	9.85e-13	1.70383	AGT
208894_at	2.07e-06	3.96e-07	1.70247	HLA-DRA
1555812_a_at	8.47e-06	2.22e-06	1.70208	ARHGDIB
204749_at	1.24e-08	4.14e-10	1.70085	NAP1L3
223501_at	6.14e-08	3.61e-09	1.7007	TNFSF13B
219014_at	0.00077	0.000376	1.69996	PLAC8
204932_at	1.36e-11	8.41e-14	1.69982	TNFRSF11B
204682_at	5.84e-12	2.9e-14	1.6993	LTBP2
207808_s_at	1.26e-08	4.25e-10	1.69926	PROS1
210664_s_at	1.26e-07	9.89e-09	1.69923	TFPI
218856_at	6.27e-13	2.02e-15	1.69519	TNFRSF21
224940_s_at	3.35e-10	4.25e-12	1.69476	PAPPA
225799_at	2.9e-11	2.16e-13	1.6944	LOC101930489
231130_at	1.71e-11	1.13e-13	1.69434	FKBP7
202855_s_at	7.42e-10	1.14e-11	1.69157	MIR6787
229553_at	5.43e-14	1.05e-16	1.69082	PGM2L1
202901_x_at	1.07e-06	1.74e-07	1.69037	CTSS
205453_at	1.15e-12	4.13e-15	1.69024	HOXB2
226560_at	8.84e-08	6e-09	1.69003	SGPP2
203382_s_at	3.05e-08	1.41e-09	1.68852	APOE
201170_s_at	3.91e-11	3.12e-13	1.68756	BHLHE40
226884_at	2.66e-12	1.13e-14	1.68746	LRRN1
212587_s_at	8.38e-05	3.15e-05	1.68693	PTPRC
1553678_a_at	4.92e-11	4.15e-13	1.68585	ITGB1
235046_at	3.48e-09	7.81e-11	1.68415	INPP4B
204787_at	1.37e-07	1.11e-08	1.68382	VSIG4
208851_s_at	6.62e-13	2.19e-15	1.68374	THY1
209312_x_at	3.75e-07	4.37e-08	1.68324	LOC101060835
201505_at	1.03e-10	1.01e-12	1.67963	LAMB1
224733_at	1.32e-12	4.92e-15	1.67936	CMTM3
218871_x_at	9.27e-12	5.3e-14	1.67927	CSGALNACT2
223463_at	1.11e-10	1.09e-12	1.67766	RAB23
204933_s_at	2.33e-10	2.76e-12	1.67542	TNFRSF11B
223434_at	1.95e-05	5.92e-06	1.6751	GBP3
226069_at	2.61e-09	5.42e-11	1.6745	PRICKLE1
226364_at	7e-12	3.7e-14	1.67384	HIP1
213910_at	2.26e-11	1.58e-13	1.67377	IGFBP7
231213_at	9.19e-09	2.78e-10	1.6726	PDE1A
203645_s_at	6.57e-06	1.64e-06	1.67056	CD163
204285_s_at	1.16e-07	8.89e-09	1.67033	PMAIP1
209723_at	5.76e-06	1.4e-06	1.66994	SERPINB9
204268_at	4.59e-06	1.06e-06	1.6694	S100A2
205081_at	8.52e-08	5.72e-09	1.66822	CRIP1
202465_at	1.16e-10	1.16e-12	1.66699	PCOLCE
225496_s_at	2.17e-09	4.27e-11	1.66533	SYTL2
206214_at	3.1e-07	3.41e-08	1.66461	PLA2G7
201508_at	2.67e-10	3.24e-12	1.66457	IGFBP4
227529_s_at	2.96e-06	6.2e-07	1.6638	AKAP12
224911_s_at	4.58e-12	2.13e-14	1.66254	DCBLD2
205528_s_at	6.08e-09	1.61e-10	1.66149	RUNX1T1
1556423_at	7.03e-10	1.06e-11	1.66102	VASH1
211026_s_at	4.13e-08	2.16e-09	1.65796	MGLL
201467_s_at	1.47e-07	1.22e-08	1.65713	NQO1
221210_s_at	3.11e-07	3.42e-08	1.65601	NPL
203476_at	2.43e-15	2.22e-18	1.65545	TPBG
60474_at	7.52e-08	4.8e-09	1.65538	FERMT1
206715_at	2.32e-07	2.29e-08	1.65527	TFEC
218232_at	2.91e-05	9.37e-06	1.65458	C1QA
208788_at	3.92e-08	2e-09	1.65437	ELOVL5
222020_s_at	8.13e-13	2.74e-15	1.654	LOC102725271
205403_at	4.9e-07	6.25e-08	1.65352	IL1R2
226136_at	2.07e-07	1.96e-08	1.65271	GLIPR1
200923_at	8.34e-10	1.33e-11	1.6526	LGALS3BP
1555950_a_at	6.99e-08	4.33e-09	1.65096	CD55
203044_at	3.17e-09	6.93e-11	1.65084	CHSY1
222877_at	3.23e-08	1.54e-09	1.65001	NRP2
202291_s_at	1.84e-08	7.06e-10	1.6498	MGP
230422_at	9.71e-09	3.01e-10	1.64889	FPR3
207802_at	0.00193	0.00104	1.64888	CRISP3
209823_x_at	1.49e-06	2.63e-07	1.64842	LOC101060835
202007_at	1.57e-07	1.33e-08	1.64824	NID1
214669_x_at	2.41e-05	7.53e-06	1.6471	IGKC
228532_at	6.72e-07	9.54e-08	1.64661	C1orf162
1554168_a_at	3.81e-09	8.78e-11	1.64606	SH3KBP1
1555724_s_at	3.85e-08	1.95e-09	1.64547	TAGLN
200838_at	9.69e-10	1.59e-11	1.6452	CTSB
227415_at	5.99e-12	3.05e-14	1.64478	DGKH
218051_s_at	4.52e-14	8.34e-17	1.64421	NT5DC2
225342_at	1.3e-07	1.02e-08	1.64266	LOC100507855
204589_at	1.56e-12	6.02e-15	1.64247	NUAK1
205173_x_at	2.42e-09	4.95e-11	1.64228	CD58
204254_s_at	2.29e-07	2.25e-08	1.64195	VDR
213800_at	5.16e-09	1.31e-10	1.64083	CFH
201525_at	1.87e-06	3.49e-07	1.63931	APOD
221127_s_at	1.52e-12	5.84e-15	1.63631	DKK3
204776_at	4.51e-07	5.59e-08	1.63616	THBS4
205780_at	2.89e-10	3.57e-12	1.63487	BIK
209626_s_at	1.92e-09	3.66e-11	1.63409	OSBPL3
223502_s_at	9.47e-08	6.61e-09	1.63298	TNFSF13B
225790_at	6.04e-09	1.59e-10	1.63245	MSRB3
217996_at	1.04e-06	1.67e-07	1.6316	PHLDA1
1554436_a_at	0.0213	0.0142	1.6312	REG4
224252_s_at	2.18e-10	2.52e-12	1.63101	FXYD5
224817_at	9.6e-15	1.25e-17	1.63077	SH3PXD2A
219947_at	3.2e-08	1.51e-09	1.62956	CLEC4A
208451_s_at	1.46e-08	5.15e-10	1.6292	C4B_2
203753_at	3.4e-08	1.65e-09	1.62718	TCF4
212077_at	2.12e-10	2.42e-12	1.6264	CALD1
204748_at	0.0011	0.000557	1.62528	PTGS2
219010_at	2.76e-06	5.68e-07	1.62353	C1orf106
211709_s_at	1.74e-11	1.15e-13	1.62325	CLEC11A
221698_s_at	1.3e-08	4.42e-10	1.62282	CLEC7A
223451_s_at	8.8e-12	4.84e-14	1.62269	CKLF
239286_at	2.09e-11	1.43e-13	1.62227	CDH11
223690_at	3.52e-11	2.73e-13	1.62149	LTBP2
204362_at	7.27e-09	2.02e-10	1.62028	SKAP2
224795_x_at	5.47e-06	1.31e-06	1.61879	IGK
203416_at	1.23e-05	3.45e-06	1.61843	CD53
202995_s_at	1.04e-06	1.67e-07	1.61834	FBLN1
37005_at	5.59e-10	8.07e-12	1.6172	MINOS1-NBL1
205174_s_at	8.31e-10	1.32e-11	1.6171	QPCT
201262_s_at	2.63e-12	1.1e-14	1.61702	BGN
205376_at	2.09e-10	2.36e-12	1.61525	INPP4B
224002_s_at	5.98e-13	1.9e-15	1.61514	FKBP7
223378_at	5.7e-13	1.8e-15	1.6135	GLIS2
201313_at	5.56e-10	8.02e-12	1.61298	ENO2
204337_at	1.12e-08	3.64e-10	1.61297	RGS4
227623_at	2.99e-08	1.37e-09	1.61225	CACNA2D1
202998_s_at	1.75e-09	3.25e-11	1.61216	LOXL2
221133_s_at	0.000291	0.000128	1.61076	CLDN18
229256_at	9.65e-14	2.22e-16	1.6102	PGM2L1
224560_at	9e-12	5e-14	1.61018	TIMP2
228707_at	1.59e-07	1.35e-08	1.60947	CLDN23
204319_s_at	2.67e-07	2.77e-08	1.60902	RGS10
204567_s_at	1.6e-06	2.87e-07	1.60824	ABCG1
209720_s_at	3.59e-05	1.19e-05	1.6055	SERPINB3
204885_s_at	1.3e-07	1.03e-08	1.60491	MSLN
221671_x_at	9.94e-06	2.69e-06	1.60423	IGK
225303_at	1.51e-11	9.61e-14	1.60217	KIRREL
201340_s_at	7.97e-10	1.25e-11	1.60185	ENC1
213413_at	3.91e-08	1.99e-09	1.60167	STON1
240432_x_at	1.2e-10	1.22e-12	1.60115	KLF7
203381_s_at	4.01e-08	2.07e-09	1.60074	APOE
205518_s_at	1.04e-07	7.55e-09	1.60005	CMAHP
238593_at	1.02e-08	3.23e-10	1.59942	C11orf80
203238_s_at	5e-14	9.52e-17	1.59914	NOTCH3
219666_at	7.89e-08	5.15e-09	1.59808	MS4A6A
225639_at	9.04e-09	2.71e-10	1.59757	SKAP2
207517_at	3.83e-09	8.83e-11	1.59628	LAMC2
204416_x_at	3.49e-08	1.7e-09	1.59516	APOC1
227697_at	2.06e-05	6.3e-06	1.59501	SOCS3
204774_at	3.47e-06	7.52e-07	1.59497	EVI2A
228585_at	8.93e-09	2.67e-10	1.59479	ENTPD1
209473_at	1.54e-10	1.65e-12	1.59371	ENTPD1
211744_s_at	2.55e-09	5.27e-11	1.59354	CD58
227897_at	7.52e-08	4.81e-09	1.59319	RAP2B
201621_at	1.08e-09	1.82e-11	1.59286	NBL1
207996_s_at	9.36e-09	2.86e-10	1.59141	LDLRAD4
213274_s_at	2.12e-10	2.42e-12	1.59011	CTSB
224650_at	6.37e-05	2.31e-05	1.58936	MAL2
214085_x_at	9.87e-08	7.04e-09	1.58908	GLIPR1
203706_s_at	4.61e-08	2.5e-09	1.58829	FZD7
203819_s_at	1.63e-07	1.4e-08	1.58746	IGF2BP3
210875_s_at	9.34e-09	2.85e-10	1.58703	ZEB1
219725_at	1.15e-13	2.79e-16	1.58659	TREM2
201926_s_at	6.25e-08	3.7e-09	1.58597	CD55
224916_at	1.9e-09	3.61e-11	1.58554	TMEM173
209619_at	6.52e-07	9.17e-08	1.585	CD74
207238_s_at	9.84e-05	3.79e-05	1.58495	PTPRC
205753_at	2.66e-06	5.43e-07	1.58465	CRP
221019_s_at	2.5e-07	2.54e-08	1.5843	COLEC12
223620_at	3.28e-07	3.66e-08	1.58404	GPR34
219161_s_at	2.31e-10	2.72e-12	1.58346	CKLF-CMTM1
205908_s_at	1.94e-06	3.65e-07	1.58223	OMD
219279_at	2.68e-05	8.54e-06	1.58088	DOCK10
203780_at	3.44e-10	4.43e-12	1.58015	MPZL2
229764_at	6.13e-10	9.03e-12	1.57682	TPRG1
226189_at	4.12e-07	4.97e-08	1.57658	ITGB8
200872_at	6.04e-11	5.38e-13	1.57656	S100A10
213258_at	9.51e-07	1.49e-07	1.5765	TFPI
204304_s_at	0.000725	0.000352	1.57586	PROM1
203939_at	1.64e-05	4.84e-06	1.57563	NT5E
225946_at	1.15e-10	1.16e-12	1.57498	RASSF8
221651_x_at	1.29e-05	3.66e-06	1.57143	IGK
215719_x_at	4.15e-08	2.17e-09	1.57091	FAS
201954_at	1.96e-09	3.76e-11	1.57074	ARPC1B
205666_at	3.06e-08	1.42e-09	1.57005	FMO1
209218_at	2.59e-12	1.08e-14	1.56954	SQLE
207426_s_at	6.37e-13	2.06e-15	1.5695	TNFSF4
224009_x_at	2.6e-07	2.67e-08	1.56944	DHRS9
226122_at	7.91e-07	1.18e-07	1.56828	PLEKHG1
222409_at	5.89e-09	1.54e-10	1.56795	CORO1C
236561_at	1.15e-09	1.96e-11	1.56775	TGFBR1
225847_at	7.22e-10	1.1e-11	1.56752	NCEH1
203698_s_at	5e-06	1.18e-06	1.56685	FRZB
220301_at	1.62e-08	5.91e-10	1.56482	CCDC102B
205786_s_at	3.16e-09	6.9e-11	1.56477	ITGAM
209969_s_at	3.01e-06	6.32e-07	1.56419	STAT1
201641_at	8.23e-10	1.31e-11	1.56415	BST2
215049_x_at	1.02e-05	2.76e-06	1.56402	CD163
243140_at	9.91e-06	2.68e-06	1.56347	ACTA2
214660_at	9.39e-08	6.53e-09	1.56285	ITGA1
201601_x_at	2.12e-08	8.6e-10	1.5625	IFITM2
223343_at	6.85e-06	1.73e-06	1.5622	MS4A7
211813_x_at	1.11e-07	8.26e-09	1.56162	DCN
202686_s_at	2.35e-09	4.74e-11	1.56076	AXL
226372_at	2.12e-10	2.43e-12	1.56051	CHST11
221447_s_at	2.45e-11	1.76e-13	1.55993	GLT8D2
218589_at	3.69e-09	8.42e-11	1.55948	LPAR6
219315_s_at	2.4e-12	9.89e-15	1.55921	TMEM204
211795_s_at	2.89e-05	9.3e-06	1.55899	FYB
212386_at	2.02e-08	8.05e-10	1.5579	TCF4
204361_s_at	1.51e-08	5.38e-10	1.55753	SKAP2
218986_s_at	2.29e-08	9.58e-10	1.55703	DDX60
210170_at	1.6e-06	2.88e-07	1.55601	PDLIM3
225227_at	3.91e-10	5.17e-12	1.55472	SKIL
202145_at	9.03e-14	1.93e-16	1.55464	LY6E
206796_at	1.04e-11	6.13e-14	1.55322	WISP1
212636_at	2.08e-07	1.99e-08	1.55282	QKI
1557432_at	1.51e-10	1.6e-12	1.55261	RASAL2
203603_s_at	2.55e-06	5.14e-07	1.55245	ZEB2
214844_s_at	1.89e-09	3.6e-11	1.55152	DOK5
209387_s_at	7.67e-10	1.18e-11	1.55068	TM4SF1
201468_s_at	1.99e-06	3.77e-07	1.55022	NQO1
244050_at	1.01e-07	7.25e-09	1.55002	HACD4
202934_at	7.54e-10	1.16e-11	1.54962	HK2
212687_at	1.17e-10	1.18e-12	1.54898	LIMS4
38241_at	2.63e-06	5.36e-07	1.54884	BTN3A3
230550_at	3.54e-06	7.7e-07	1.54797	MS4A6A
201842_s_at	1.2e-07	9.25e-09	1.54729	EFEMP1
202935_s_at	2.49e-05	7.85e-06	1.54718	SOX9
211742_s_at	6.86e-05	2.52e-05	1.54706	EVI2B
204779_s_at	2.4e-12	9.86e-15	1.5462	HOXB7
204162_at	8.2e-08	5.41e-09	1.54608	NDC80
240868_at	4.54e-10	6.22e-12	1.54508	LOC100129406
1558828_s_at	7.88e-07	1.17e-07	1.54488	CARMN
229504_at	9.99e-09	3.13e-10	1.54455	RAB23
212473_s_at	9.34e-14	2.05e-16	1.54441	MICAL2
216950_s_at	2.34e-09	4.71e-11	1.54417	FCGR1CP
226726_at	2.84e-12	1.22e-14	1.54336	MBOAT2
201417_at	2.84e-12	1.22e-14	1.54272	SOX4
201288_at	3.77e-06	8.34e-07	1.54211	ARHGDIB
211651_s_at	5.46e-11	4.77e-13	1.54179	LAMB1
226837_at	1.77e-08	6.68e-10	1.53914	SPRED1
213891_s_at	7.46e-08	4.75e-09	1.53819	TCF4
202510_s_at	3.13e-09	6.8e-11	1.53801	TNFAIP2
219434_at	2.31e-07	2.28e-08	1.53737	TREM1
219506_at	6.58e-08	3.97e-09	1.53573	C1orf54
202663_at	1.38e-06	2.39e-07	1.53522	WIPF1
201291_s_at	1.71e-05	5.08e-06	1.5347	TOP2A
201251_at	1.15e-12	4.13e-15	1.5341	PKM
241137_at	0.000133	5.31e-05	1.53132	DPCR1
202086_at	2.51e-08	1.08e-09	1.53094	MX1
218309_at	1.81e-07	1.63e-08	1.53064	CAMK2N1
217755_at	8.24e-08	5.45e-09	1.5292	HN1
204070_at	2.99e-06	6.28e-07	1.5281	RARRES3
209335_at	1.62e-06	2.92e-07	1.52786	DCN
211644_x_at	0.00187	0.000998	1.52723	IGK
209344_at	4.58e-11	3.79e-13	1.52652	TPM4
223595_at	4.42e-07	5.45e-08	1.52533	TMEM133
233109_at	7.24e-08	4.56e-09	1.52435	COL12A1
201037_at	7.18e-10	1.09e-11	1.52318	PFKP
201893_x_at	5.94e-08	3.47e-09	1.52296	DCN
204222_s_at	1.86e-07	1.69e-08	1.52238	GLIPR1
220658_s_at	4.6e-09	1.12e-10	1.52225	ARNTL2
219892_at	3.22e-10	4.04e-12	1.52207	TM6SF1
200986_at	1.22e-11	7.45e-14	1.52175	SERPING1
204702_s_at	9.12e-10	1.47e-11	1.5205	NFE2L3
201185_at	6e-12	3.06e-14	1.51945	HTRA1
231579_s_at	7.75e-12	4.18e-14	1.51931	TIMP2
204345_at	1.59e-13	4.05e-16	1.5183	COL16A1
223952_x_at	2.89e-07	3.1e-08	1.51812	DHRS9
213664_at	2.82e-05	9.05e-06	1.51716	SLC1A1
235952_at	5.53e-09	1.42e-10	1.51658	DGKH
203000_at	6.69e-06	1.68e-06	1.51635	STMN2
1569344_a_at	2.87e-05	9.22e-06	1.5162	LOC105375172
204438_at	1.72e-05	5.08e-06	1.51598	MRC1
57588_at	9.65e-14	2.2e-16	1.51503	SLC24A3
204823_at	7.14e-08	4.45e-09	1.5145	NAV3
212792_at	8.16e-10	1.29e-11	1.51426	DPY19L1
202878_s_at	4.47e-07	5.54e-08	1.51417	CD93
203185_at	4.03e-06	9.06e-07	1.51357	RASSF2
230424_at	1.21e-12	4.42e-15	1.51196	NREP
204653_at	4.18e-08	2.2e-09	1.51076	TFAP2A
226086_at	9.86e-06	2.67e-06	1.51017	SYT13
220272_at	1.18e-10	1.2e-12	1.50985	BNC2
202957_at	1.68e-05	4.94e-06	1.50978	HCLS1
204670_x_at	6.03e-07	8.27e-08	1.50922	LOC100996809
1553530_a_at	1.66e-11	1.07e-13	1.50918	ITGB1
214701_s_at	2.54e-10	3.05e-12	1.50889	FN1
220014_at	6.89e-12	3.63e-14	1.50863	PRR16
213416_at	0.00012	4.74e-05	1.50857	ITGA4
209960_at	6.42e-09	1.72e-10	1.50837	HGF
1557079_at	9.62e-10	1.57e-11	1.50823	ITGBL1
204446_s_at	9.5e-09	2.92e-10	1.50772	ALOX5
210517_s_at	6.37e-07	8.9e-08	1.50583	AKAP12
227036_at	5.4e-14	1.04e-16	1.50563	RASAL2
203935_at	4.15e-13	1.26e-15	1.50544	ACVR1
216915_s_at	1.06e-07	7.73e-09	1.50338	PTPN12
231956_at	5.75e-09	1.49e-10	1.50283	RNF213
203510_at	2.66e-09	5.54e-11	1.50207	MET
231941_s_at	2.76e-07	2.9e-08	1.50197	MUC20
234764_x_at	0.00107	0.000539	1.50169	IGLJ3
202760_s_at	2.14e-06	4.13e-07	1.50165	PALM2-AKAP2
205003_at	2.12e-10	2.43e-12	1.50164	DOCK4
217875_s_at	1.22e-11	7.49e-14	1.50137	PMEPA1
224583_at	4.59e-07	5.72e-08	1.5013	COTL1
203256_at	4.98e-09	1.24e-10	1.5013	CDH3
1552703_s_at	0.000136	5.45e-05	1.5004	CARD16
200697_at	4.2e-10	5.64e-12	1.5001	HK1
209924_at	4.24e-05	1.45e-05	1.50009	CCL18
205803_s_at	2.54e-09	5.24e-11	1.49993	TRPC1
208637_x_at	2.24e-13	6.23e-16	1.49886	ACTN1
213428_s_at	7.74e-09	2.21e-10	1.49856	COL6A1
227370_at	2.34e-09	4.71e-11	1.49803	FAM171B
204286_s_at	6.06e-07	8.33e-08	1.49684	PMAIP1
208636_at	1.13e-13	2.73e-16	1.49636	ACTN1
200839_s_at	6.01e-10	8.81e-12	1.49617	CTSB
214059_at	5.49e-10	7.9e-12	1.49507	IFI44
225502_at	2.93e-05	9.45e-06	1.49455	DOCK8
228573_at	5.46e-10	7.86e-12	1.4944	ANTXR2
235733_at	1.5e-09	2.68e-11	1.49428	GXYLT2
201858_s_at	3.56e-05	1.18e-05	1.49338	SRGN
209369_at	2.08e-07	1.98e-08	1.49208	ANXA3
220092_s_at	1.83e-12	7.21e-15	1.49082	ANTXR1
216942_s_at	5.89e-09	1.54e-10	1.49018	CD58
201292_at	7.4e-06	1.9e-06	1.48966	TOP2A
204256_at	7.56e-07	1.11e-07	1.48964	ELOVL6
221058_s_at	1.7e-11	1.11e-13	1.48932	CKLF
225442_at	2.37e-09	4.8e-11	1.48767	DDR2
221773_at	1.38e-08	4.78e-10	1.48648	ELK3
208306_x_at	3.27e-07	3.65e-08	1.48555	HLA-DRB1
238756_at	1.53e-07	1.28e-08	1.48546	GAS2L3
229723_at	0.000179	7.45e-05	1.48429	TAGAP
208396_s_at	7.26e-08	4.58e-09	1.48349	PDE1A
209386_at	6.75e-12	3.53e-14	1.48312	TM4SF1
227174_at	0.000392	0.000179	1.48309	WDR72
201005_at	3.88e-11	3.1e-13	1.48289	CD9
226000_at	3.77e-11	2.98e-13	1.48196	CTTNBP2NL
202679_at	7.95e-10	1.24e-11	1.47973	NPC1
209457_at	3.45e-06	7.46e-07	1.47829	DUSP5
218718_at	8.84e-12	4.9e-14	1.47826	PDGFC
218211_s_at	2.74e-07	2.88e-08	1.47717	MLPH
215077_at	5.36e-10	7.67e-12	1.4769	COL3A1
201063_at	1.02e-10	9.85e-13	1.47626	RCN1
212746_s_at	1.55e-11	9.91e-14	1.47598	CEP170P1
227449_at	8.17e-09	2.36e-10	1.47445	EPHA4
219901_at	2.37e-12	9.68e-15	1.47405	FGD6
1567628_at	7.09e-07	1.02e-07	1.47351	CD74
227889_at	2.07e-11	1.42e-13	1.47338	LPCAT2
227742_at	1.84e-07	1.66e-08	1.4729	CLIC6
224710_at	2.45e-11	1.75e-13	1.47279	NARR
214830_at	1.98e-10	2.21e-12	1.47267	SLC38A6
1568765_at	4.87e-06	1.14e-06	1.47174	SERPINE1
231029_at	1.63e-06	2.94e-07	1.47101	F5
1555349_a_at	8.88e-08	6.05e-09	1.46995	ITGB2
217478_s_at	8.45e-07	1.28e-07	1.46851	HLA-DMA
205116_at	3.37e-09	7.52e-11	1.46792	LAMA2
1558680_s_at	4.66e-08	2.53e-09	1.46568	PDE1A
216510_x_at	0.00204	0.0011	1.4656	IGHV3-23
224793_s_at	5.23e-11	4.52e-13	1.46556	TGFBR1
228080_at	3.27e-10	4.12e-12	1.46466	LAYN
226576_at	1.02e-09	1.7e-11	1.46379	ARHGAP26
224917_at	7.8e-08	5.06e-09	1.46312	MIR21
227801_at	3.18e-09	6.96e-11	1.46273	TRIM59
221541_at	2.15e-08	8.76e-10	1.46273	CRISPLD2
203131_at	4.33e-08	2.31e-09	1.46224	PDGFRA
226757_at	1.79e-08	6.85e-10	1.46033	IFIT2
226279_at	2.64e-09	5.5e-11	1.46028	PRSS23
221011_s_at	2.2e-10	2.56e-12	1.46009	LBH
219181_at	2.18e-08	8.94e-10	1.45919	LIPG
226065_at	1.84e-10	2.04e-12	1.4588	PRICKLE1
219134_at	3.66e-06	8.03e-07	1.45827	ADGRL4
205419_at	2.95e-05	9.53e-06	1.45699	GPR183
214836_x_at	0.000142	5.75e-05	1.45571	IGK
213923_at	7.27e-10	1.11e-11	1.45512	RAP2B
226425_at	1.53e-10	1.64e-12	1.45459	CLIP4
201125_s_at	3.49e-15	3.7e-18	1.45428	ITGB5
225189_s_at	7.82e-08	5.08e-09	1.45395	RAPH1
230000_at	6.81e-08	4.17e-09	1.45324	RNF213
207266_x_at	1.92e-08	7.48e-10	1.45207	RBMS1
219386_s_at	2.54e-08	1.09e-09	1.45194	SLAMF8
212985_at	6.05e-12	3.11e-14	1.45011	APBB2
225265_at	5.29e-07	6.94e-08	1.44924	RBMS1
213909_at	2.16e-08	8.8e-10	1.44892	LRRC15
220617_s_at	6.34e-12	3.28e-14	1.44874	ZNF532
235296_at	2.26e-14	3.56e-17	1.44871	EIF5A2
228280_at	1.27e-09	2.22e-11	1.44855	ZC3HAV1L
226789_at	3.27e-05	1.07e-05	1.44717	EMB
239272_at	5.33e-08	3e-09	1.44707	MMP28
214022_s_at	1.01e-07	7.28e-09	1.44394	IFITM1
209583_s_at	6.61e-08	3.99e-09	1.44296	CD200
213503_x_at	1.73e-13	4.59e-16	1.44215	ANXA2
209373_at	4.2e-05	1.44e-05	1.44177	MALL
226218_at	0.000561	0.000265	1.44125	IL7R
202006_at	3.03e-09	6.53e-11	1.44051	PTPN12
201422_at	1.48e-08	5.28e-10	1.44014	IFI30
222396_at	3.11e-08	1.45e-09	1.4395	HN1
223586_at	1.55e-09	2.79e-11	1.43839	ARNTL2
212481_s_at	3.51e-10	4.53e-12	1.43822	TPM4
201315_x_at	2e-09	3.86e-11	1.43816	IFITM2
209627_s_at	5.07e-09	1.27e-10	1.43809	OSBPL3
202052_s_at	2.21e-09	4.37e-11	1.43741	RAI14
213988_s_at	1.67e-07	1.46e-08	1.4367	SAT1
238447_at	1.62e-08	5.93e-10	1.43665	RBMS3
212423_at	6.43e-10	9.56e-12	1.43545	ZCCHC24
209682_at	5.34e-08	3.01e-09	1.43527	CBLB
222088_s_at	2.13e-06	4.11e-07	1.43397	SLC2A14
211734_s_at	9.09e-06	2.42e-06	1.43393	FCER1A
224791_at	2.03e-08	8.13e-10	1.43328	ASAP1
201720_s_at	1.38e-06	2.38e-07	1.43322	LAPTM5
211564_s_at	1.38e-10	1.44e-12	1.4328	PDLIM4
215617_at	5.73e-09	1.49e-10	1.43208	SPATS2L
228628_at	4.78e-10	6.65e-12	1.43161	SRGAP2C
217591_at	2.69e-11	1.99e-13	1.43013	SKIL
218502_s_at	3.71e-11	2.89e-13	1.42977	TRPS1
238029_s_at	2.89e-08	1.31e-09	1.42848	SLC16A14
223361_at	1.6e-06	2.87e-07	1.42826	ABRACL
224356_x_at	5.27e-07	6.9e-08	1.42765	MS4A6A
204279_at	4.08e-05	1.39e-05	1.42736	PSMB9
242943_at	8.9e-06	2.36e-06	1.42687	ST8SIA4
226077_at	1.45e-08	5.1e-10	1.42676	RNF145
213746_s_at	6.34e-09	1.69e-10	1.4265	FLNA
232165_at	6.88e-07	9.83e-08	1.42569	EPPK1
219054_at	2.04e-08	8.19e-10	1.42536	NPR3
217733_s_at	4.94e-11	4.18e-13	1.42527	TMSB10
203085_s_at	8.96e-09	2.69e-10	1.42464	TGFB1
230214_at	1.71e-07	1.5e-08	1.42378	MRVI1
1557049_at	5.12e-11	4.39e-13	1.42345	BTBD19
227870_at	1.44e-06	2.52e-07	1.42309	IGDCC4
226899_at	9.18e-12	5.16e-14	1.42198	UNC5B
204272_at	0.00572	0.00341	1.42153	LGALS4
213519_s_at	4.85e-08	2.67e-09	1.42115	LAMA2
206420_at	3.34e-06	7.19e-07	1.42043	IGSF6
225834_at	3.79e-07	4.44e-08	1.42036	FAM72A
227561_at	4.62e-09	1.12e-10	1.41976	DDR2
201150_s_at	1.03e-08	3.25e-10	1.41924	TIMP3
210643_at	4.7e-06	1.09e-06	1.41861	TNFSF11
219908_at	4.15e-08	2.17e-09	1.41847	DKK2
242979_at	2.72e-14	4.58e-17	1.41784	IRS1
1555137_a_at	9.36e-12	5.43e-14	1.417	FGD6
227236_at	9.2e-09	2.8e-10	1.41686	TSPAN2
1555420_a_at	2.46e-10	2.94e-12	1.41681	KLF7
203477_at	8.78e-09	2.61e-10	1.41667	COL15A1
212190_at	1.97e-07	1.83e-08	1.41664	SERPINE2
217109_at	4.97e-05	1.74e-05	1.41629	MUC4
209498_at	4.36e-05	1.5e-05	1.41622	CEACAM1
205559_s_at	4.96e-06	1.17e-06	1.41594	PCSK5
203213_at	2.92e-06	6.07e-07	1.41567	CDK1
228273_at	1.36e-06	2.35e-07	1.41505	PRR11
201250_s_at	7.88e-08	5.13e-09	1.41479	SLC2A1
203414_at	9.35e-07	1.46e-07	1.41476	MMD
213703_at	1.7e-10	1.86e-12	1.41472	LINC00342
201169_s_at	7.73e-10	1.2e-11	1.4146	BHLHE40
223280_x_at	4.2e-07	5.1e-08	1.41372	MS4A6A
228333_at	1.83e-06	3.39e-07	1.41306	ZEB2
216474_x_at	1.02e-05	2.76e-06	1.41232	TPSB2
202464_s_at	8.54e-07	1.3e-07	1.41209	PFKFB3
216899_s_at	2.05e-08	8.2e-10	1.41182	SKAP2
225269_s_at	5.81e-09	1.52e-10	1.41168	RBMS1
211911_x_at	4.32e-07	5.3e-08	1.41056	HLA-B
212382_at	1.01e-07	7.22e-09	1.41023	TCF4
219602_s_at	1.01e-07	7.22e-09	1.40975	PIEZO2
230323_s_at	0.00156	0.000819	1.40886	TMEM45B
204400_at	6.65e-09	1.79e-10	1.40759	EFS
202458_at	2.41e-10	2.86e-12	1.40751	PRSS23
204030_s_at	2.34e-06	4.64e-07	1.4066	IQCJ-SCHIP1
231807_at	9.31e-13	3.15e-15	1.40648	KIAA1217
222719_s_at	2.45e-11	1.76e-13	1.406	PDGFC
223176_at	9.19e-09	2.78e-10	1.40533	KCTD20
31845_at	3.33e-07	3.73e-08	1.40465	ELF4
244455_at	1.16e-08	3.81e-10	1.40389	KCNT2
224996_at	1.81e-09	3.38e-11	1.40343	ASPH
202555_s_at	1.24e-06	2.09e-07	1.4034	MYLK
227399_at	6.35e-07	8.86e-08	1.40296	VGLL3
223492_s_at	7.56e-08	4.84e-09	1.40262	LRRFIP1
207134_x_at	7.85e-06	2.04e-06	1.40185	TPSB2
221530_s_at	9.29e-10	1.51e-11	1.40101	BHLHE41
209437_s_at	3.59e-07	4.11e-08	1.40082	SPON1
218559_s_at	2.5e-07	2.53e-08	1.4005	MAFB
228923_at	2.73e-08	1.21e-09	1.40014	S100A6
224937_at	1.2e-11	7.31e-14	1.39992	PTGFRN
203835_at	3.35e-12	1.47e-14	1.39984	LRRC32
209374_s_at	0.00424	0.00246	1.39763	IGHM
232843_s_at	7.7e-05	2.87e-05	1.39741	DOCK8
204924_at	9.81e-09	3.05e-10	1.39652	TLR2
206101_at	2.15e-06	4.17e-07	1.39426	ECM2
204363_at	1.18e-08	3.9e-10	1.3927	F3
211990_at	1.43e-06	2.48e-07	1.39208	HLA-DPA1
224952_at	5.64e-13	1.78e-15	1.39194	TANC2
222146_s_at	8.59e-08	5.77e-09	1.39184	TCF4
228088_at	1.9e-11	1.28e-13	1.39171	SESTD1
232530_at	1.09e-07	8.12e-09	1.39121	PLD1
209868_s_at	4.2e-08	2.22e-09	1.3911	RBMS1
204972_at	1.22e-07	9.45e-09	1.39078	OAS2
205159_at	0.000423	0.000194	1.38798	CSF2RB
206994_at	9.73e-10	1.6e-11	1.38711	CST4
228121_at	8.42e-09	2.46e-10	1.38688	TGFB2
209621_s_at	1.54e-09	2.78e-11	1.38605	PDLIM3
37408_at	4.67e-12	2.19e-14	1.38586	MRC2
227452_at	3.64e-08	1.8e-09	1.38537	LINC00673
205654_at	3.77e-06	8.33e-07	1.38491	C4BPA
202800_at	5.24e-08	2.93e-09	1.38417	SLC1A3
211395_x_at	1.81e-08	6.95e-10	1.38379	FCGR2C
210785_s_at	2.07e-05	6.31e-06	1.38318	THEMIS2
219918_s_at	1.34e-05	3.82e-06	1.38313	ASPM
217196_s_at	5.46e-10	7.83e-12	1.38253	CAMSAP2
210538_s_at	8.05e-06	2.1e-06	1.38203	BIRC3
203923_s_at	1.53e-05	4.44e-06	1.38203	CYBB
205032_at	3.03e-12	1.31e-14	1.38191	ITGA2
228143_at	3.17e-05	1.03e-05	1.38183	CP
201286_at	4.41e-08	2.36e-09	1.38169	SDC1
238668_at	0.000141	5.68e-05	1.38168	NCKAP1L
209524_at	1.89e-09	3.58e-11	1.38085	HDGFRP3
203700_s_at	2.78e-13	8.08e-16	1.38034	DIO2
206133_at	7.35e-08	4.66e-09	1.38001	XAF1
226568_at	2.36e-08	9.96e-10	1.37961	FAM102B
201920_at	8.16e-09	2.36e-10	1.37879	SLC20A1
243864_at	3.75e-07	4.38e-08	1.37702	CCDC80
212387_at	2.78e-08	1.24e-09	1.37689	TCF4
226534_at	6.04e-09	1.59e-10	1.37617	KITLG
215033_at	1.86e-07	1.69e-08	1.37563	TM4SF1
208949_s_at	3.14e-08	1.47e-09	1.37481	LGALS3
226731_at	1.27e-07	9.94e-09	1.37439	ITGA1
211368_s_at	0.000382	0.000174	1.37437	CASP1
212419_at	2.55e-09	5.27e-11	1.37437	ZCCHC24
226743_at	2.21e-08	9.13e-10	1.37313	SLFN11
229560_at	2.57e-05	8.12e-06	1.37262	TLR8
201324_at	3.79e-06	8.4e-07	1.37056	EMP1
214467_at	2.25e-05	6.97e-06	1.36973	GPR65
203729_at	1.68e-07	1.46e-08	1.36928	EMP3
212013_at	6.18e-07	8.54e-08	1.36897	PXDN
219574_at	3.78e-05	1.27e-05	1.36873	MARCH1
210427_x_at	2.53e-13	7.17e-16	1.36778	ANXA2
205798_at	0.00057	0.00027	1.36574	IL7R
224823_at	4.52e-06	1.04e-06	1.36347	MYLK
229450_at	1.2e-06	2.01e-07	1.36234	IFIT3
208729_x_at	3.88e-07	4.59e-08	1.36198	HLA-B
227725_at	0.00122	0.000627	1.36196	ST6GALNAC1
219691_at	3.13e-08	1.46e-09	1.36083	SAMD9
225612_s_at	5.83e-06	1.42e-06	1.35817	B3GNT5
227955_s_at	1.66e-10	1.8e-12	1.35782	EFNA5
220146_at	1.72e-07	1.51e-08	1.35645	TLR7
227041_at	8.8e-12	4.85e-14	1.35643	SESTD1
214806_at	7.53e-11	6.91e-13	1.35547	BICD1
204192_at	0.000315	0.00014	1.35519	CD37
212136_at	9.86e-10	1.63e-11	1.35424	ATP2B4
214920_at	2.93e-08	1.33e-09	1.35421	THSD7A
224927_at	1.3e-07	1.02e-08	1.35345	PPP1R18
218796_at	1.64e-06	2.97e-07	1.35306	FERMT1
203854_at	2.87e-09	6.09e-11	1.35293	CFI
203708_at	0.000268	0.000117	1.35275	PDE4B
211654_x_at	3.39e-05	1.12e-05	1.35141	HLA-DQB1
205619_s_at	5.08e-06	1.2e-06	1.3501	MEOX1
205027_s_at	7.94e-06	2.07e-06	1.35005	MAP3K8
41469_at	2.53e-07	2.57e-08	1.34974	PI3
218883_s_at	6.05e-06	1.49e-06	1.34954	CENPU
201088_at	6.69e-08	4.08e-09	1.34912	KPNA2
206571_s_at	9.49e-13	3.24e-15	1.34873	MAP4K4
242881_x_at	4.19e-06	9.5e-07	1.34782	DUXAP10
200771_at	5.63e-10	8.13e-12	1.34764	LAMC1
213425_at	3.31e-09	7.33e-11	1.34725	WNT5A
225188_at	2.7e-08	1.19e-09	1.34723	RAPH1
202620_s_at	1.06e-08	3.4e-10	1.34714	PLOD2
203695_s_at	5.71e-10	8.29e-12	1.34641	DFNA5
222077_s_at	1.99e-07	1.86e-08	1.34498	RACGAP1
221485_at	2.89e-08	1.31e-09	1.34491	B4GALT5
227376_at	3.02e-09	6.48e-11	1.34437	GLI3
208789_at	1.59e-08	5.77e-10	1.34433	PTRF
213418_at	1.36e-05	3.89e-06	1.34401	HSPA6
213646_x_at	4.19e-09	9.95e-11	1.34373	TUBA1B
237094_at	3.83e-10	5.01e-12	1.34348	FAM19A5
214428_x_at	4.37e-08	2.34e-09	1.34296	C4B_2
213975_s_at	3.14e-05	1.02e-05	1.34249	LYZ
213668_s_at	2.61e-10	3.16e-12	1.34178	SOX4
219540_at	1.42e-08	4.99e-10	1.34153	ZNF267
201590_x_at	4.47e-13	1.39e-15	1.34083	ANXA2
230175_s_at	1.1e-09	1.87e-11	1.34057	DCBLD2
221676_s_at	8.05e-09	2.32e-10	1.34029	CORO1C
202283_at	3.84e-07	4.52e-08	1.34008	SERPINF1
201149_s_at	5.46e-09	1.4e-10	1.33939	TIMP3
226936_at	1.6e-07	1.36e-08	1.33863	CENPW
211796_s_at	0.000777	0.000379	1.33849	TRBC1
203748_x_at	8.72e-09	2.57e-10	1.3381	RBMS1
235421_at	3.7e-07	4.29e-08	1.33792	MAP3K8
226430_at	8.16e-07	1.23e-07	1.33721	RELL1
202619_s_at	1.06e-09	1.77e-11	1.33712	PLOD2
209101_at	1.02e-06	1.63e-07	1.33649	CTGF
235457_at	1.01e-09	1.68e-11	1.33625	MAML2
204205_at	5.13e-06	1.22e-06	1.3355	APOBEC3G
211750_x_at	1.86e-09	3.5e-11	1.3353	TUBA1C
217430_x_at	8.67e-08	5.85e-09	1.33504	COL1A1
212765_at	5.95e-10	8.72e-12	1.33501	CAMSAP2
240440_at	3.52e-07	4.02e-08	1.33487	NPL
204780_s_at	2.31e-08	9.68e-10	1.3336	FAS
214981_at	1.94e-07	1.79e-08	1.33351	POSTN
209212_s_at	9.74e-05	3.74e-05	1.33314	KLF5
228365_at	2.54e-09	5.23e-11	1.33257	CPNE8
242228_at	3.34e-09	7.42e-11	1.33212	BICD1
204533_at	4.95e-05	1.73e-05	1.33048	CXCL10
204223_at	4.89e-07	6.24e-08	1.33047	PRELP
211470_s_at	0.00242	0.00133	1.33038	SULT1C2
200644_at	4.09e-08	2.12e-09	1.33026	MARCKSL1
215127_s_at	3.68e-08	1.83e-09	1.33017	RBMS1
201474_s_at	7.36e-09	2.06e-10	1.32864	ITGA3
225241_at	5.42e-07	7.16e-08	1.32832	CCDC80
202669_s_at	1.18e-07	9.08e-09	1.32743	EFNB2
226769_at	2.43e-08	1.04e-09	1.32715	FIBIN
203231_s_at	9.98e-09	3.12e-10	1.32707	ATXN1
213094_at	3.07e-06	6.48e-07	1.32665	ADGRG6
203767_s_at	1.51e-10	1.61e-12	1.3263	STS
219922_s_at	2.64e-11	1.93e-13	1.32628	LTBP3
216252_x_at	2.34e-07	2.31e-08	1.32577	FAS
213001_at	3.56e-07	4.07e-08	1.32417	ANGPTL2
217986_s_at	1.2e-06	2e-07	1.32415	BAZ1A
219439_at	3.87e-07	4.57e-08	1.32406	C1GALT1
204678_s_at	5.49e-07	7.27e-08	1.3239	KCNK1
232304_at	3.84e-06	8.53e-07	1.32384	PELI1
227705_at	6.49e-07	9.12e-08	1.32373	TCEAL7
203895_at	1.53e-06	2.72e-07	1.32371	PLCB4
213603_s_at	0.000105	4.06e-05	1.32333	RAC2
206932_at	1.81e-06	3.35e-07	1.32328	CH25H
211058_x_at	3.73e-09	8.55e-11	1.32326	TUBA1B
221039_s_at	3.15e-08	1.47e-09	1.32282	ASAP1
201090_x_at	8.37e-09	2.43e-10	1.32224	TUBA1B
223854_at	3.66e-11	2.85e-13	1.32224	PCDHB9
205683_x_at	1.17e-05	3.26e-06	1.32219	TPSAB1
211656_x_at	1.59e-06	2.86e-07	1.32206	LOC101060835
202446_s_at	2.74e-09	5.75e-11	1.32172	PLSCR1
209118_s_at	4.91e-10	6.9e-12	1.3203	TUBA1A
224772_at	2.03e-09	3.93e-11	1.31999	NAV1
226552_at	2.2e-13	6.09e-16	1.31944	IER5L
208025_s_at	1.5e-05	4.36e-06	1.31922	HMGA2
223672_at	4.64e-11	3.86e-13	1.31893	SGIP1
205648_at	1.94e-09	3.73e-11	1.31861	WNT2
224594_x_at	6.73e-09	1.83e-10	1.31829	ACTB
214500_at	1.16e-07	8.85e-09	1.31779	H2AFY
213275_x_at	1.05e-10	1.02e-12	1.31698	CTSB
209209_s_at	8.21e-07	1.24e-07	1.31622	FERMT2
205552_s_at	3.3e-07	3.69e-08	1.31586	OAS1
224428_s_at	0.000223	9.51e-05	1.31573	CDCA7
222872_x_at	5.91e-05	2.12e-05	1.31542	NABP1
1559584_a_at	0.00155	0.000816	1.31461	C16orf54
207826_s_at	3.22e-08	1.52e-09	1.31342	ID3
208659_at	3.13e-10	3.92e-12	1.31271	CLIC1
239999_at	1.54e-07	1.29e-08	1.312	MIR99AHG
203932_at	2.87e-06	5.95e-07	1.31158	HLA-DMB
229669_at	8.34e-10	1.33e-11	1.31135	CCDC144NL-AS1
212414_s_at	5.06e-06	1.19e-06	1.31125	GLYR1
209035_at	1.14e-07	8.64e-09	1.31117	MDK
231823_s_at	6.14e-12	3.17e-14	1.31112	SH3PXD2B
209676_at	4.94e-06	1.16e-06	1.31064	TFPI
223939_at	7.52e-06	1.93e-06	1.31006	SUCNR1
222453_at	9.02e-06	2.4e-06	1.30999	CYBRD1
1552619_a_at	4.03e-06	9.06e-07	1.30954	ANLN
238439_at	1.07e-05	2.95e-06	1.30859	ANKRD22
213652_at	1.56e-07	1.32e-08	1.30811	PCSK5
218039_at	2.84e-06	5.86e-07	1.30747	NUSAP1
227480_at	1.86e-06	3.48e-07	1.30592	SUSD2
209901_x_at	1.8e-05	5.36e-06	1.30468	AIF1
209780_at	3.61e-09	8.2e-11	1.30458	PHTF2
201287_s_at	5.96e-09	1.57e-10	1.30438	SDC1
226047_at	2.88e-09	6.11e-11	1.30393	MRVI1
203140_at	7.65e-09	2.17e-10	1.3033	BCL6
203824_at	0.0136	0.00878	1.30328	TSPAN8
228592_at	0.0444	0.0317	1.30326	MS4A1
212298_at	3.17e-08	1.49e-09	1.30306	NRP1
227062_at	3.04e-09	6.54e-11	1.30258	MIR612
209909_s_at	3.43e-08	1.67e-09	1.3024	TGFB2
229927_at	4.61e-06	1.07e-06	1.30149	LEMD1
216840_s_at	1.01e-07	7.23e-09	1.30148	LAMA2
214329_x_at	1.14e-06	1.88e-07	1.30071	TNFSF10
215199_at	9.69e-10	1.59e-11	1.3002	CALD1
47550_at	6.57e-11	5.93e-13	1.29945	LZTS1
213793_s_at	1.28e-08	4.33e-10	1.299	HOMER1
225144_at	8.84e-11	8.31e-13	1.29844	BMPR2
1555852_at	0.000144	5.84e-05	1.29841	PSMB8-AS1
205767_at	0.000334	0.000149	1.29774	EREG
203915_at	7.02e-05	2.58e-05	1.29765	CXCL9
211762_s_at	2.95e-07	3.2e-08	1.29609	KPNA2
228218_at	3.52e-06	7.64e-07	1.2959	LSAMP
210220_at	1.24e-14	1.77e-17	1.29395	FZD2
203697_at	4.1e-05	1.39e-05	1.29355	FRZB
209900_s_at	8.38e-06	2.2e-06	1.29341	SLC16A1
233587_s_at	6.46e-09	1.73e-10	1.29312	SIPA1L2
202728_s_at	4.8e-14	9.03e-17	1.2926	LTBP1
204994_at	8.77e-08	5.94e-09	1.29192	MX2
205425_at	4.94e-11	4.17e-13	1.29162	HIP1
208937_s_at	3.04e-05	9.85e-06	1.29154	ID1
218400_at	3.93e-09	9.17e-11	1.29147	OAS3
200788_s_at	2.14e-09	4.19e-11	1.29121	PEA15
1556051_a_at	2.25e-10	2.63e-12	1.29109	BICD1
203074_at	1.24e-05	3.46e-06	1.29099	ANXA8L1
228776_at	6.95e-08	4.28e-09	1.29089	GJC1
226885_at	2.54e-12	1.05e-14	1.29088	RNF217
209040_s_at	8.84e-06	2.34e-06	1.29046	PSMB8
223082_at	1.84e-09	3.47e-11	1.28992	SH3KBP1
212724_at	2.34e-06	4.63e-07	1.28952	RND3
221538_s_at	4.9e-10	6.85e-12	1.28904	PLXNA1
200762_at	1.94e-08	7.62e-10	1.28867	DPYSL2
216207_x_at	0.00235	0.00129	1.2882	IGKC
200859_x_at	4.24e-09	1.01e-10	1.28803	FLNA
214081_at	3.79e-11	3.01e-13	1.28766	PLXDC1
227231_at	8.84e-06	2.34e-06	1.28615	KIAA1211
209526_s_at	3.31e-09	7.33e-11	1.28608	HDGFRP3
205802_at	1.94e-09	3.72e-11	1.28595	TRPC1
213293_s_at	2.15e-05	6.61e-06	1.28575	TRIM22
219032_x_at	2.01e-09	3.88e-11	1.28567	OPN3
205270_s_at	2.74e-05	8.77e-06	1.28549	LCP2
202748_at	2.26e-07	2.21e-08	1.28506	GBP2
202439_s_at	1.82e-11	1.22e-13	1.28459	IDS
213432_at	9.89e-05	3.81e-05	1.28456	MUC5B
227099_s_at	1.61e-05	4.73e-06	1.2837	C11orf96
222895_s_at	0.000123	4.86e-05	1.28363	BCL11B
210815_s_at	4.03e-07	4.83e-08	1.28351	CALCRL
202643_s_at	3.09e-05	1e-05	1.2834	TNFAIP3
209251_x_at	1.64e-09	3e-11	1.28337	TUBA1C
235352_at	7.17e-08	4.48e-09	1.28305	MR1
217294_s_at	1.43e-06	2.49e-07	1.283	ENO1
203370_s_at	9.27e-12	5.28e-14	1.28276	PDLIM7
224209_s_at	0.0035	0.00199	1.28263	GDA
203455_s_at	1.72e-07	1.51e-08	1.28255	SAT1
227346_at	0.00122	0.000627	1.28179	IKZF1
203104_at	6.02e-06	1.48e-06	1.28148	CSF1R
204686_at	5.45e-14	1.07e-16	1.28101	IRS1
209276_s_at	0.000116	4.57e-05	1.28079	GLRX
212262_at	1.21e-07	9.32e-09	1.28032	QKI
209012_at	1.47e-12	5.56e-15	1.28007	TRIO
206295_at	2.15e-07	2.07e-08	1.2799	IL18
213798_s_at	5.65e-09	1.46e-10	1.27981	CAP1
201201_at	1.12e-10	1.12e-12	1.27974	CSTB
203693_s_at	3.18e-08	1.49e-09	1.27941	E2F3
211643_x_at	0.00439	0.00255	1.27938	IGK
230130_at	3.11e-06	6.56e-07	1.2792	SLIT2
211072_x_at	5.18e-09	1.31e-10	1.27883	TUBA1B
1555638_a_at	5.18e-05	1.83e-05	1.27871	SAMSN1
227210_at	2.78e-06	5.73e-07	1.27855	SFMBT2
225687_at	3.62e-05	1.21e-05	1.27841	FAM83D
223279_s_at	2.96e-11	2.21e-13	1.27761	UACA
212599_at	3.52e-08	1.72e-09	1.27755	AUTS2
227367_at	5.91e-09	1.55e-10	1.27718	SLCO3A1
240303_at	0.000208	8.81e-05	1.27698	TMC5
228937_at	2.56e-07	2.61e-08	1.27557	LACC1
204348_s_at	2.25e-07	2.2e-08	1.27521	LOC100507855
1555203_s_at	0.000194	8.12e-05	1.27454	SLC44A4
202951_at	4.71e-10	6.52e-12	1.27452	STK38
203153_at	4.56e-07	5.68e-08	1.2735	IFIT1
212385_at	8.04e-08	5.27e-09	1.27309	TCF4
212192_at	7.09e-06	1.8e-06	1.27264	KCTD12
222379_at	1.61e-06	2.9e-07	1.27263	KCNE4
204221_x_at	3.77e-07	4.41e-08	1.27189	GLIPR1
226663_at	3.3e-09	7.31e-11	1.27166	ANKRD10-IT1
206414_s_at	5.4e-12	2.62e-14	1.27142	ASAP2
217525_at	2.47e-06	4.94e-07	1.27137	OLFML1
220177_s_at	5.67e-06	1.37e-06	1.27129	TMPRSS3
224894_at	1.27e-09	2.19e-11	1.27117	YAP1
205407_at	1.57e-06	2.82e-07	1.27064	RECK
212203_x_at	3.78e-10	4.91e-12	1.27005	IFITM3
226873_at	6.15e-10	9.07e-12	1.26933	FAM63B
225842_at	8.86e-08	6.02e-09	1.26897	PHLDA1
229491_at	1.35e-10	1.4e-12	1.26756	SLC9B2
216973_s_at	1.07e-12	3.77e-15	1.26704	HOXB7
204912_at	0.000179	7.44e-05	1.26667	IL10RA
221752_at	2.11e-10	2.39e-12	1.26644	SSH1
206884_s_at	4.29e-06	9.76e-07	1.2657	SCEL
226795_at	1.81e-08	6.91e-10	1.2646	LRCH1
208816_x_at	1.87e-13	5.07e-16	1.26457	ANXA2P2
231726_at	1.33e-08	4.56e-10	1.26444	PCDHB14
238430_x_at	4.02e-07	4.81e-08	1.26402	SLFN5
204944_at	7.98e-11	7.38e-13	1.26349	PTPRG
227148_at	1.13e-07	8.48e-09	1.26318	PLEKHH2
202609_at	6.62e-08	4.01e-09	1.26288	EPS8
226421_at	4.95e-10	6.96e-12	1.26232	AMMECR1
218182_s_at	4.23e-06	9.6e-07	1.26145	CLDN1
219655_at	2.67e-09	5.59e-11	1.26075	SUGCT
213113_s_at	2.3e-09	4.6e-11	1.26046	SLC43A3
222810_s_at	1.74e-16	7.8e-20	1.26001	RASAL2
202043_s_at	5.15e-09	1.3e-10	1.25896	SMS
223730_at	7.18e-10	1.09e-11	1.2589	GPC6
203936_s_at	0.000776	0.000379	1.25841	MMP9
235834_at	1.6e-11	1.02e-13	1.25836	CALD1
211071_s_at	1.21e-09	2.07e-11	1.25781	MLLT11
219895_at	1.43e-06	2.49e-07	1.25739	TMEM255A
209140_x_at	1.59e-07	1.35e-08	1.25737	HLA-B
220988_s_at	1.91e-08	7.41e-10	1.25703	C1QTNF3
201212_at	5.27e-06	1.26e-06	1.25653	LGMN
200625_s_at	1.67e-08	6.17e-10	1.25629	CAP1
200736_s_at	5.2e-10	7.38e-12	1.25388	GPX1
213867_x_at	5.91e-09	1.55e-10	1.25358	ACTB
220030_at	6.76e-06	1.7e-06	1.25356	STYK1
203964_at	1.06e-07	7.76e-09	1.2532	NMI
226756_at	7.23e-08	4.54e-09	1.25213	CCDC71L
201325_s_at	1.48e-05	4.27e-06	1.25208	EMP1
219799_s_at	1.83e-07	1.65e-08	1.25123	DHRS9
225990_at	1.08e-06	1.76e-07	1.25101	BOC
209260_at	1.65e-06	3e-07	1.2508	SFN
212887_at	9.06e-07	1.4e-07	1.25069	SEC23A
227607_at	7.55e-07	1.11e-07	1.25034	STAMBPL1
202771_at	3.77e-11	2.98e-13	1.24843	PIEZO1
223509_at	3.75e-05	1.26e-05	1.24735	CLDN2
205122_at	7.05e-10	1.07e-11	1.24722	MSANTD3-TMEFF1
200650_s_at	1.74e-07	1.54e-08	1.24683	LDHA
228821_at	7.52e-06	1.93e-06	1.24666	ST6GAL2
213419_at	9.36e-12	5.44e-14	1.24661	APBB2
230741_at	1.7e-07	1.49e-08	1.24617	P2RX7
203313_s_at	5.44e-12	2.65e-14	1.24523	TGIF1
209392_at	0.000169	6.98e-05	1.24409	ENPP2
222602_at	2.01e-07	1.89e-08	1.24362	UBA6
226622_at	1.2e-06	2.01e-07	1.24337	MUC20
215073_s_at	4.37e-07	5.37e-08	1.24322	NR2F2
229800_at	0.000462	0.000214	1.24273	DCLK1
203607_at	6.61e-11	6e-13	1.24248	INPP5F
202191_s_at	4.33e-08	2.31e-09	1.24244	GAS7
205242_at	0.0298	0.0206	1.24228	CXCL13
228224_at	2.01e-06	3.81e-07	1.2421	PRELP
203148_s_at	1.63e-05	4.79e-06	1.24178	TRIM14
230708_at	3.79e-07	4.43e-08	1.24135	PRICKLE1
217378_x_at	0.00268	0.00149	1.24105	IGKV1OR2-108
227013_at	8.72e-09	2.58e-10	1.24088	LATS2
203072_at	4.8e-12	2.27e-14	1.24031	MYO1E
210992_x_at	1.09e-08	3.54e-10	1.2402	FCGR2C
203180_at	1.84e-06	3.42e-07	1.2401	ALDH1A3
225731_at	1.76e-13	4.73e-16	1.23964	ANKRD50
225871_at	1.21e-09	2.07e-11	1.23941	STEAP2
205100_at	6.15e-07	8.49e-08	1.23867	GFPT2
223158_s_at	1.9e-10	2.11e-12	1.23865	NEK6
216693_x_at	8.28e-09	2.4e-10	1.2383	HDGFRP3
225735_at	6.05e-13	1.94e-15	1.23666	ANKRD50
208836_at	2.66e-07	2.76e-08	1.23648	ATP1B3
225355_at	2.22e-08	9.18e-10	1.23647	NEURL1B
213857_s_at	8.02e-10	1.26e-11	1.23568	CD47
204140_at	8.14e-11	7.57e-13	1.23528	TPST1
200787_s_at	5.21e-09	1.32e-10	1.23387	PEA15
213496_at	1.55e-07	1.31e-08	1.23317	PLPPR4
204990_s_at	6.66e-09	1.8e-10	1.23314	ITGB4
231775_at	3.15e-08	1.47e-09	1.23285	TNFRSF10A
203699_s_at	6.02e-11	5.35e-13	1.23241	DIO2
206201_s_at	0.000195	8.17e-05	1.23221	MEOX2
223679_at	2.15e-08	8.73e-10	1.23209	CTNNB1
202948_at	1.97e-08	7.76e-10	1.2317	IL1R1
238542_at	5.09e-08	2.83e-09	1.23159	ULBP2
204163_at	1.53e-10	1.63e-12	1.2314	EMILIN1
201137_s_at	4.18e-06	9.46e-07	1.23105	HLA-DPB1
226751_at	1.01e-06	1.61e-07	1.23093	CNRIP1
200801_x_at	4.93e-09	1.22e-10	1.2303	ACTB
205534_at	9.65e-07	1.52e-07	1.22869	PCDH7
213411_at	3.95e-08	2.03e-09	1.22853	ADAM22
200808_s_at	8.37e-09	2.44e-10	1.2281	ZYX
226350_at	1.82e-08	6.98e-10	1.22731	CHML
225102_at	1.62e-07	1.4e-08	1.22717	MGLL
205267_at	0.0177	0.0117	1.2271	POU2AF1
216401_x_at	0.00474	0.00278	1.2267	MLIP
221059_s_at	4.89e-06	1.14e-06	1.22664	COTL1
205590_at	1.9e-05	5.75e-06	1.22575	RASGRP1
210423_s_at	8.18e-08	5.39e-09	1.22485	SLC11A1
203788_s_at	7.54e-09	2.12e-10	1.22426	SEMA3C
227297_at	0.000298	0.000132	1.22376	ITGA9
222662_at	4.25e-09	1.01e-10	1.22348	PPP1R3B
222760_at	1.47e-09	2.62e-11	1.22279	ZNF703
218656_s_at	4.67e-06	1.08e-06	1.22277	LHFP
227812_at	7.25e-08	4.56e-09	1.22221	TNFRSF19
203892_at	1.09e-08	3.54e-10	1.22182	WFDC2
222392_x_at	9.75e-05	3.75e-05	1.22178	PERP
210605_s_at	8.89e-14	1.89e-16	1.22134	MFGE8
209298_s_at	2.32e-06	4.58e-07	1.22039	ITSN1
203504_s_at	3.35e-08	1.62e-09	1.22037	ABCA1
216623_x_at	0.00243	0.00133	1.22021	TOX3
221935_s_at	9.11e-09	2.75e-10	1.21955	EOGT
212334_at	3.1e-09	6.74e-11	1.21947	GNS
220955_x_at	1.99e-08	7.9e-10	1.21844	RAB23
202994_s_at	5.2e-06	1.24e-06	1.21765	FBLN1
202869_at	9.55e-07	1.5e-07	1.21739	OAS1
223922_x_at	1.6e-06	2.87e-07	1.21723	MS4A6A
213725_x_at	6.4e-09	1.72e-10	1.21715	XYLT1
201859_at	3.92e-06	8.76e-07	1.2158	SRGN
223499_at	1.41e-11	8.85e-14	1.21566	C1QTNF5
AFFX-HSAC07/X00351_5_at	1.09e-06	1.78e-07	1.21565	ACTB
211945_s_at	4.1e-11	3.31e-13	1.21561	ITGB1
221875_x_at	3.68e-06	8.09e-07	1.21537	HLA-F
212639_x_at	2.94e-09	6.28e-11	1.21426	TUBA1B
209356_x_at	2.33e-10	2.76e-12	1.21366	EFEMP2
225645_at	0.000875	0.000433	1.21362	EHF
201697_s_at	3.98e-07	4.74e-08	1.21361	DNMT1
204725_s_at	1.64e-10	1.78e-12	1.21349	NCK1
202351_at	1.95e-11	1.33e-13	1.21297	ITGAV
61734_at	2.24e-10	2.62e-12	1.21192	RCN3
205990_s_at	1.21e-08	4.02e-10	1.2119	WNT5A
220122_at	9.29e-05	3.54e-05	1.21187	MCTP1
228846_at	7.03e-05	2.59e-05	1.21163	MXD1
204825_at	4.19e-06	9.49e-07	1.21152	MELK
209795_at	0.0088	0.00545	1.21115	CD69
218773_s_at	3.04e-08	1.41e-09	1.21032	MSRB2
213518_at	1.08e-10	1.06e-12	1.20956	PRKCI
1554195_a_at	5.5e-07	7.3e-08	1.20937	C5orf46
211675_s_at	2.26e-07	2.22e-08	1.20904	MDFIC
203290_at	0.0204	0.0136	1.20874	HLA-DQA1
220979_s_at	1.48e-06	2.6e-07	1.2086	ST6GALNAC5
209576_at	7.73e-09	2.2e-10	1.20843	GNAI1
224374_s_at	1.95e-08	7.64e-10	1.2084	EMILIN2
233547_x_at	1.82e-07	1.64e-08	1.20835	PDE1A
204834_at	0.000403	0.000184	1.20763	FGL2
227692_at	3.95e-08	2.03e-09	1.20657	GNAI1
1553117_a_at	4.67e-09	1.14e-10	1.20657	STK38
205935_at	4.4e-06	1.01e-06	1.2064	FOXF1
204007_at	0.000164	6.73e-05	1.20588	FCGR3B
AFFX-HSAC07/X00351_M_at	3.99e-07	4.77e-08	1.20515	ACTB
230748_at	4.61e-06	1.07e-06	1.20493	SLC16A6
211075_s_at	1.09e-08	3.52e-10	1.2047	CD47
212472_at	1.38e-10	1.44e-12	1.20392	MICAL2
225406_at	2.41e-11	1.71e-13	1.20324	TWSG1
209946_at	6.46e-07	9.05e-08	1.20241	VEGFC
235746_s_at	2.5e-08	1.07e-09	1.20222	PLA2R1
230206_at	2.83e-06	5.85e-07	1.20142	DOCK5
226725_at	1.94e-08	7.57e-10	1.20131	SLFN5
202897_at	3.38e-09	7.55e-11	1.20093	SIRPA
1558028_x_at	1.13e-06	1.86e-07	1.20046	NORAD
235458_at	4.3e-08	2.29e-09	1.20039	HAVCR2
226604_at	9.35e-10	1.52e-11	1.20023	TMTC3
217118_s_at	2.38e-10	2.82e-12	1.20014	KIAA0930
201719_s_at	1.05e-07	7.62e-09	1.19991	EPB41L2
218404_at	7.11e-08	4.42e-09	1.19971	SNX10
228241_at	0.0206	0.0138	1.19955	AGR3
215198_s_at	1.61e-09	2.95e-11	1.19944	CALD1
204781_s_at	1.66e-07	1.45e-08	1.19915	FAS
230036_at	8.24e-07	1.24e-07	1.19915	SAMD9L
209882_at	9.19e-08	6.33e-09	1.19908	RIT1
205618_at	9.34e-10	1.52e-11	1.19888	PRRG1
235489_at	2.36e-05	7.37e-06	1.1984	RHOJ
201163_s_at	1.08e-08	3.46e-10	1.19831	IGFBP7
214752_x_at	1.51e-08	5.41e-10	1.19827	FLNA
202827_s_at	9.9e-11	9.51e-13	1.19812	MMP14
209604_s_at	6.37e-06	1.58e-06	1.19772	GATA3
223095_at	9.34e-14	2.04e-16	1.19769	MARVELD1
230494_at	4.87e-07	6.19e-08	1.1974	SLC20A1
203562_at	1.19e-06	1.99e-07	1.19728	FEZ1
226219_at	0.000193	8.11e-05	1.19693	ARHGAP30
226633_at	1.59e-05	4.64e-06	1.19686	RAB8B
210915_x_at	0.00164	0.000866	1.19608	TRBC1
201341_at	1.99e-11	1.35e-13	1.19393	ENC1
209897_s_at	2.96e-07	3.21e-08	1.19344	SLIT2
218574_s_at	2.46e-08	1.05e-09	1.19322	LMCD1
202637_s_at	2.22e-06	4.33e-07	1.1931	ICAM1
225763_at	0.000444	0.000205	1.19272	RCSD1
228772_at	2.82e-08	1.26e-09	1.19256	HNMT
226853_at	2.2e-07	2.12e-08	1.19199	BMP2K
200755_s_at	1.9e-12	7.53e-15	1.19099	CALU
225973_at	3.55e-05	1.18e-05	1.1904	TAP2
213135_at	1.82e-07	1.63e-08	1.18962	TIAM1
201579_at	2.71e-07	2.84e-08	1.18861	FAT1
1555705_a_at	1.18e-11	7.19e-14	1.18846	CMTM3
207992_s_at	1.3e-08	4.41e-10	1.18829	AMPD3
230875_s_at	6.33e-09	1.68e-10	1.18821	ATP11A
203559_s_at	0.0167	0.011	1.18761	AOC1
209933_s_at	3e-05	9.69e-06	1.18711	CD300A
215313_x_at	1.79e-07	1.6e-08	1.18689	HLA-A
226869_at	4.88e-10	6.81e-12	1.18651	MEGF6
231771_at	0.00146	0.000761	1.18649	GJB6
204451_at	4.65e-11	3.88e-13	1.18648	FZD1
204563_at	0.0051	0.003	1.18629	SELL
203362_s_at	4.22e-05	1.44e-05	1.18597	MAD2L1
225673_at	9.43e-08	6.57e-09	1.18595	MYADM
228167_at	0.000558	0.000264	1.18588	KLHL6
210827_s_at	5.33e-05	1.88e-05	1.18496	ELF3
235476_at	2.22e-06	4.34e-07	1.18468	TRIM59
236429_at	1.14e-10	1.14e-12	1.18424	ZNF83
223395_at	3.26e-05	1.07e-05	1.18418	ABI3BP
205308_at	3.64e-12	1.62e-14	1.18368	ZC2HC1A
222592_s_at	0.00243	0.00134	1.18357	ACSL5
212501_at	1.94e-08	7.6e-10	1.18308	CEBPB
202498_s_at	2.18e-05	6.72e-06	1.18292	SLC2A3
218401_s_at	1.68e-08	6.22e-10	1.18288	ZNF281
218252_at	1.52e-06	2.69e-07	1.18267	CKAP2
36711_at	0.000101	3.88e-05	1.18262	MAFF
225016_at	6.43e-08	3.84e-09	1.18246	APCDD1
241994_at	0.00775	0.00474	1.18246	XDH
221814_at	1.87e-09	3.53e-11	1.18192	ADGRA2
230318_at	1.25e-05	3.53e-06	1.18152	SERPINA1
226603_at	6.08e-07	8.36e-08	1.181	SAMD9L
222848_at	5.45e-05	1.93e-05	1.18079	CENPK
242447_at	1.88e-05	5.66e-06	1.18056	C3orf70
219872_at	3.91e-07	4.63e-08	1.18047	FAM198B
202566_s_at	1.25e-08	4.19e-10	1.18001	SVIL
203705_s_at	1.98e-07	1.84e-08	1.1798	FZD7
217356_s_at	1.89e-06	3.55e-07	1.17953	PGK1
212573_at	5.06e-09	1.27e-10	1.17934	ENDOD1
219684_at	5.98e-09	1.58e-10	1.17915	RTP4
218983_at	4.24e-11	3.47e-13	1.17878	C1RL
227126_at	1.97e-09	3.79e-11	1.17856	PTPRG
204698_at	0.000757	0.000369	1.17757	ISG20
211367_s_at	0.00108	0.000546	1.17729	CASP1
206115_at	0.00234	0.00128	1.17661	EGR3
213160_at	0.00015	6.11e-05	1.17601	DOCK2
210764_s_at	0.000372	0.000168	1.17594	CYR61
212091_s_at	2.77e-07	2.93e-08	1.17583	COL6A1
1552502_s_at	1.29e-07	1.02e-08	1.17564	RHBDL2
230229_at	2.04e-08	8.17e-10	1.17529	DLG1
215813_s_at	4.21e-08	2.22e-09	1.17467	PTGS1
205898_at	0.000128	5.1e-05	1.17403	CX3CR1
231832_at	1.98e-06	3.76e-07	1.17386	POC1B-GALNT4
1555730_a_at	3.9e-06	8.7e-07	1.17333	CFL1
225262_at	4.12e-07	4.98e-08	1.1728	FOSL2
214298_x_at	1.89e-05	5.69e-06	1.17279	SEP6
204715_at	3.32e-08	1.59e-09	1.17262	PANX1
229390_at	0.00469	0.00274	1.17239	FAM26F
204891_s_at	0.000596	0.000284	1.17235	LCK
225367_at	2.1e-08	8.46e-10	1.17197	PGM2
201718_s_at	7.41e-07	1.08e-07	1.17178	EPB41L2
217744_s_at	0.000156	6.37e-05	1.17178	PERP
214774_x_at	0.00266	0.00147	1.17155	TOX3
232617_at	6.09e-05	2.2e-05	1.17049	CTSS
210663_s_at	3.47e-08	1.69e-09	1.17046	KYNU
205501_at	3.22e-08	1.53e-09	1.17037	PDE10A
227719_at	1.09e-05	2.98e-06	1.17003	SMAD9
219383_at	2.96e-06	6.2e-07	1.1691	PRR5L
213110_s_at	2.71e-07	2.83e-08	1.16896	COL4A5
212188_at	2.59e-06	5.25e-07	1.16871	KCTD12
225008_at	2.22e-10	2.58e-12	1.16851	ASPH
202971_s_at	5.11e-07	6.63e-08	1.16798	DYRK2
201231_s_at	2.7e-08	1.19e-09	1.16793	ENO1
201890_at	0.00041	0.000188	1.16791	RRM2
214710_s_at	1.27e-05	3.58e-06	1.16722	CCNB1
239294_at	0.000182	7.59e-05	1.16644	PIK3CG
202479_s_at	4.85e-08	2.67e-09	1.16631	TRIB2
217771_at	4.14e-05	1.41e-05	1.16628	GOLM1
217148_x_at	0.00877	0.00542	1.16624	IGLJ3
226016_at	2.31e-07	2.28e-08	1.16596	CD47
1555731_a_at	1.63e-06	2.95e-07	1.1659	AP1S3
227998_at	1.59e-08	5.79e-10	1.16509	S100A16
231646_at	0.00217	0.00118	1.16453	DPCR1
213797_at	3.78e-09	8.67e-11	1.1642	RSAD2
215051_x_at	1.64e-05	4.83e-06	1.16375	AIF1
229310_at	2.96e-07	3.21e-08	1.16367	KLHL29
201631_s_at	1.84e-08	7.06e-10	1.1636	IER3
226225_at	5.2e-07	6.78e-08	1.16324	MCC
204026_s_at	1.6e-05	4.68e-06	1.16271	ZWINT
241808_at	5.44e-12	2.66e-14	1.16261	ZC2HC1A
211764_s_at	7.35e-08	4.67e-09	1.16183	UBE2D1
205579_at	3.87e-07	4.57e-08	1.1611	HRH1
227713_at	9.51e-11	9.08e-13	1.16048	KATNAL1
205488_at	0.00342	0.00194	1.16036	GZMA
242814_at	3.38e-05	1.11e-05	1.16022	SERPINB9
222830_at	3.26e-07	3.64e-08	1.16005	GRHL1
224218_s_at	1.23e-10	1.26e-12	1.15914	TRPS1
205266_at	1.86e-07	1.68e-08	1.15856	LIF
216560_x_at	0.00702	0.00426	1.15854	IGLC1
223344_s_at	0.000196	8.23e-05	1.15824	MS4A7
204806_x_at	7.16e-06	1.82e-06	1.15808	HLA-F
221765_at	5.02e-05	1.76e-05	1.15808	UGCG
235740_at	5.01e-07	6.42e-08	1.15781	MCTP1
226641_at	0.000244	0.000106	1.15744	ANKRD44
226841_at	0.00282	0.00157	1.15728	MPEG1
228152_s_at	1.06e-07	7.77e-09	1.15701	DDX60L
205475_at	0.000194	8.12e-05	1.15653	SCRG1
223047_at	1.81e-09	3.39e-11	1.15643	CMTM6
226348_at	4.14e-09	9.75e-11	1.15598	FUT11
206198_s_at	0.000128	5.09e-05	1.15583	CEACAM7
223454_at	6.41e-11	5.76e-13	1.15539	CXCL16
202370_s_at	1.87e-09	3.53e-11	1.15533	CBFB
218788_s_at	3.95e-12	1.78e-14	1.15434	SMYD3
203821_at	2.62e-05	8.31e-06	1.15368	HBEGF
224833_at	2.47e-05	7.75e-06	1.15356	ETS1
231067_s_at	5.05e-05	1.77e-05	1.15284	AKAP12
204255_s_at	3.53e-05	1.17e-05	1.15222	VDR
209406_at	4.19e-06	9.49e-07	1.15208	BAG2
232202_at	3.35e-05	1.1e-05	1.15008	FAM83B
204334_at	3.22e-10	4.04e-12	1.14985	KLF7
202604_x_at	3.09e-09	6.7e-11	1.14978	ADAM10
212647_at	1.12e-08	3.63e-10	1.14925	RRAS
214454_at	7.98e-11	7.4e-13	1.14923	ADAMTS2
227618_at	1.61e-07	1.38e-08	1.14898	NHSL2
226658_at	2.18e-10	2.52e-12	1.14844	PDPN
219594_at	2.42e-09	4.93e-11	1.1483	NINJ2
218162_at	1.96e-06	3.7e-07	1.14827	OLFML3
205098_at	6.86e-05	2.52e-05	1.14801	CCR1
226771_at	1.83e-05	5.49e-06	1.14686	ATP8B2
241789_at	3.63e-07	4.18e-08	1.14665	RBMS3
209365_s_at	3.76e-11	2.95e-13	1.14636	ECM1
1558732_at	4.91e-10	6.88e-12	1.14573	MAP4K4
1552365_at	0.00227	0.00124	1.14544	SCIN
226184_at	1.66e-09	3.05e-11	1.14458	FMNL2
226722_at	6.61e-11	6.01e-13	1.14445	FAM20C
210592_s_at	2.64e-08	1.16e-09	1.14431	SAT1
215108_x_at	0.00189	0.00101	1.14371	TOX3
207571_x_at	5.77e-05	2.07e-05	1.14367	THEMIS2
212372_at	6.97e-08	4.31e-09	1.14347	MYH10
229265_at	4.4e-09	1.06e-10	1.14316	SKI
227626_at	0.000124	4.93e-05	1.14302	PAQR8
227900_at	2.42e-06	4.83e-07	1.14281	CBLB
201307_at	1.38e-09	2.43e-11	1.14253	SEP11
226818_at	0.00455	0.00266	1.14202	MPEG1
212918_at	4.14e-09	9.75e-11	1.14197	RECQL
206350_at	2.57e-05	8.13e-06	1.14137	APCS
AFFX-HSAC07/X00351_3_at	2.13e-08	8.64e-10	1.14126	ACTB
205263_at	3.04e-06	6.39e-07	1.14112	BCL10
208892_s_at	1.38e-05	3.96e-06	1.14053	DUSP6
219099_at	2.93e-07	3.16e-08	1.13993	TIGAR
238689_at	4.41e-06	1.01e-06	1.13979	ADGRF1
231779_at	5.39e-09	1.38e-10	1.13978	IRAK2
221840_at	5.41e-05	1.92e-05	1.13962	PTPRE
204198_s_at	0.000531	0.00025	1.13959	RUNX3
214684_at	7.35e-08	4.67e-09	1.13938	MEF2A
227261_at	4.96e-06	1.17e-06	1.13932	KLF12
202141_s_at	1.62e-11	1.04e-13	1.13879	COPS8
201876_at	5.83e-09	1.52e-10	1.13858	PON2
233446_at	0.00336	0.0019	1.13831	ONECUT2
204821_at	1.64e-05	4.83e-06	1.13822	BTN3A3
205168_at	3.31e-09	7.33e-11	1.13756	DDR2
205068_s_at	4.68e-11	3.91e-13	1.13756	ARHGAP26
222348_at	2e-08	7.92e-10	1.13693	MAST4
211160_x_at	5.95e-12	2.99e-14	1.13667	ACTN1
226932_at	5.34e-08	3.02e-09	1.13592	SSPN
210559_s_at	1.24e-05	3.49e-06	1.13592	CDK1
201473_at	2.64e-07	2.73e-08	1.1356	JUNB
202307_s_at	8.31e-07	1.26e-07	1.13555	TAP1
228058_at	0.000518	0.000243	1.13548	ZG16B
217997_at	2.5e-05	7.86e-06	1.13521	PHLDA1
201289_at	0.000214	9.08e-05	1.13488	CYR61
204672_s_at	4.68e-09	1.14e-10	1.13476	ANKRD6
227966_s_at	8.16e-12	4.45e-14	1.13402	CCDC74B
213541_s_at	5.91e-05	2.12e-05	1.13389	ERG
1554464_a_at	1.15e-07	8.77e-09	1.1331	CRTAP
212702_s_at	3.03e-08	1.4e-09	1.13259	BICD2
226275_at	0.000128	5.09e-05	1.13188	MXD1
201124_at	1.47e-11	9.26e-14	1.13097	ITGB5
213288_at	1.3e-10	1.33e-12	1.12973	MBOAT2
209348_s_at	0.000459	0.000213	1.12957	MAF
234103_at	4.34e-09	1.04e-10	1.12945	KCNT2
242903_at	2.89e-06	6e-07	1.12936	IFNGR1
225604_s_at	4.19e-05	1.43e-05	1.12887	GLIPR2
204236_at	0.000855	0.000422	1.12866	FLI1
203407_at	5.35e-07	7.05e-08	1.12857	PPL
1566342_at	2.9e-07	3.11e-08	1.12857	SOD2
211003_x_at	5.08e-09	1.28e-10	1.12833	TGM2
205582_s_at	9.62e-12	5.61e-14	1.12829	GGT5
225975_at	8.02e-07	1.2e-07	1.1281	PCDH18
219476_at	0.000164	6.73e-05	1.12797	C1orf116
210830_s_at	2.1e-08	8.5e-10	1.12724	PON2
212799_at	3.24e-09	7.13e-11	1.12671	STX6
227862_at	2.75e-06	5.65e-07	1.12622	TRNP1
209191_at	5.95e-06	1.46e-06	1.12617	TUBB6
201189_s_at	1.38e-08	4.79e-10	1.1258	ITPR3
201487_at	6.61e-07	9.34e-08	1.12525	CTSC
225548_at	1.38e-05	3.94e-06	1.12522	SHROOM3
205190_at	0.00904	0.00561	1.12418	PLS1
202305_s_at	9.31e-07	1.45e-07	1.12394	FEZ2
211828_s_at	2.04e-06	3.9e-07	1.12354	TNIK
219410_at	6.11e-06	1.51e-06	1.12267	TMEM45A
216971_s_at	6.28e-11	5.61e-13	1.12254	PLEC
212632_at	7.86e-09	2.25e-10	1.12165	STX7
222572_at	6.8e-09	1.85e-10	1.12101	PDP1
202376_at	0.0155	0.0101	1.12067	SERPINA3
204879_at	1.26e-09	2.19e-11	1.12043	PDPN
225344_at	2.7e-07	2.82e-08	1.11978	NCOA7
203232_s_at	4.74e-10	6.58e-12	1.11964	ATXN1
210084_x_at	5.64e-05	2.01e-05	1.11957	TPSAB1
213568_at	5.39e-05	1.91e-05	1.11949	OSR2
227971_at	0.000307	0.000136	1.11943	NRK
212263_at	4.74e-08	2.59e-09	1.11933	QKI
205120_s_at	9.31e-12	5.35e-14	1.11924	SGCB
213457_at	1.84e-07	1.66e-08	1.11914	MFHAS1
223393_s_at	1.09e-08	3.52e-10	1.11896	TSHZ3
208423_s_at	2.94e-07	3.18e-08	1.11873	MSR1
207233_s_at	2.21e-11	1.54e-13	1.1186	MITF
209546_s_at	2.98e-10	3.71e-12	1.11857	APOL1
212338_at	3.78e-07	4.42e-08	1.11803	MYO1D
206448_at	3.36e-10	4.29e-12	1.11774	ZNF365
204404_at	1.7e-05	5.03e-06	1.1176	SLC12A2
206377_at	6.71e-06	1.68e-06	1.11757	FOXF2
219747_at	2.27e-06	4.47e-07	1.11705	NDNF
236129_at	9.77e-06	2.63e-06	1.11685	GALNT5
210176_at	6.95e-06	1.76e-06	1.11667	TLR1
228188_at	1.15e-06	1.9e-07	1.11655	FOSL2
209505_at	9.11e-06	2.43e-06	1.11559	NR2F1
218585_s_at	4.66e-05	1.62e-05	1.11542	DTL
1553043_a_at	1.16e-06	1.92e-07	1.11523	CD300LF
218273_s_at	2.12e-10	2.41e-12	1.1151	PDP1
204820_s_at	4.04e-05	1.37e-05	1.11471	BTN3A2
225835_at	1.45e-06	2.54e-07	1.11437	SLC12A2
226763_at	1.09e-10	1.07e-12	1.11434	SESTD1
208790_s_at	1.68e-07	1.47e-08	1.11425	PTRF
212758_s_at	1.75e-07	1.55e-08	1.11411	ZEB1
212650_at	1.94e-08	7.57e-10	1.11321	EHBP1
208394_x_at	1.24e-05	3.49e-06	1.1132	ESM1
204713_s_at	1.97e-06	3.72e-07	1.11317	F5
226632_at	6.88e-10	1.03e-11	1.11232	CYGB
225929_s_at	9.33e-09	2.85e-10	1.11179	RNF213
219648_at	1.21e-08	4.03e-10	1.1113	MREG
201215_at	1.57e-09	2.85e-11	1.11093	PLS3
204401_at	1.15e-07	8.79e-09	1.11085	KCNN4
227539_at	1.25e-06	2.1e-07	1.1108	GNA13
219454_at	3.87e-06	8.61e-07	1.11064	EGFL6
227850_x_at	9.33e-05	3.56e-05	1.1101	CDC42EP5
212592_at	0.0124	0.00794	1.11008	JCHAIN
209083_at	0.000807	0.000396	1.10944	CORO1A
204612_at	5.54e-08	3.15e-09	1.10935	PKIA
227295_at	3.62e-07	4.17e-08	1.10913	IKBIP
1555938_x_at	0.000422	0.000194	1.10889	VIM
210719_s_at	6.63e-08	4.01e-09	1.10877	HMG20B
208988_at	4.34e-08	2.32e-09	1.10865	KDM2A
215946_x_at	0.000209	8.83e-05	1.10854	IGLL3P
207034_s_at	1.08e-10	1.06e-12	1.10824	GLI2
225045_at	4.84e-09	1.19e-10	1.10664	CCDC88A
226066_at	2.43e-10	2.89e-12	1.10622	MITF
213154_s_at	2.17e-08	8.89e-10	1.1061	BICD2
1559529_at	2.46e-11	1.77e-13	1.10576	PTK2
225436_at	6.41e-05	2.33e-05	1.10563	ABHD17C
201328_at	0.000239	0.000103	1.10559	ETS2
208743_s_at	1.45e-07	1.2e-08	1.10542	YWHAB
238567_at	2.21e-06	4.31e-07	1.10519	SGPP2
219936_s_at	0.000392	0.000178	1.10466	GPR87
217757_at	2.38e-08	1.01e-09	1.1046	A2M
209678_s_at	1.55e-09	2.8e-11	1.1044	PRKCI
204415_at	2.12e-06	4.08e-07	1.10369	IFI6
1567107_s_at	3.47e-10	4.47e-12	1.10288	TPM4
1565717_s_at	1.53e-05	4.46e-06	1.10258	FUS
201939_at	6.81e-07	9.7e-08	1.10235	PLK2
222651_s_at	2.94e-09	6.29e-11	1.10209	TRPS1
228785_at	7.21e-09	2e-10	1.10107	ZNF281
217889_s_at	0.000169	6.97e-05	1.10082	CYBRD1
212486_s_at	0.000243	0.000105	1.1006	FYN
235085_at	3.78e-07	4.43e-08	1.09927	SGK223
222670_s_at	3.9e-07	4.62e-08	1.09927	MAFB
227530_at	3.43e-05	1.13e-05	1.09922	AKAP12
1552658_a_at	1.41e-05	4.06e-06	1.09907	NAV3
219403_s_at	9.79e-07	1.55e-07	1.09893	HPSE
229285_at	2.16e-08	8.8e-10	1.0985	RNASEL
1569150_x_at	5.24e-11	4.53e-13	1.09833	PDLIM7
203739_at	2.65e-06	5.39e-07	1.09819	ZNF217
228396_at	6.1e-09	1.62e-10	1.09814	PRKG1
232094_at	4.76e-07	6.02e-08	1.09812	KATNBL1
205421_at	7.77e-06	2.01e-06	1.09781	SLC22A3
209146_at	1.16e-07	8.85e-09	1.09759	MSMO1
225033_at	8.9e-09	2.66e-10	1.09753	ST3GAL1
212666_at	1.66e-11	1.08e-13	1.09747	SMURF1
220750_s_at	1.47e-11	9.3e-14	1.09696	P3H1
202068_s_at	9.01e-06	2.39e-06	1.09675	LDLR
201649_at	2.94e-07	3.18e-08	1.09661	UBE2L6
206100_at	1.6e-06	2.88e-07	1.09623	CPM
205119_s_at	7.77e-05	2.89e-05	1.09621	FPR1
222803_at	4.84e-09	1.19e-10	1.0959	PRTFDC1
227196_at	0.000237	0.000102	1.09546	RHPN2
202806_at	2.78e-10	3.4e-12	1.09487	DBN1
224341_x_at	0.00023	9.84e-05	1.09453	TLR4
202369_s_at	4.21e-08	2.22e-09	1.09427	TRAM2
235408_x_at	9.28e-09	2.83e-10	1.0939	ZNF117
218542_at	4.64e-05	1.61e-05	1.09293	CEP55
227688_at	2.44e-08	1.04e-09	1.09278	LRCH2
219229_at	1.08e-07	7.95e-09	1.09263	SLCO3A1
230252_at	2.48e-05	7.81e-06	1.0924	LPAR5
225380_at	5.11e-09	1.29e-10	1.09193	PKDCC
205349_at	8.27e-08	5.48e-09	1.09178	GNA15
204900_x_at	3.08e-07	3.37e-08	1.09166	SAP30
209154_at	1.5e-09	2.69e-11	1.09134	P2RX5-TAX1BP3
228584_at	5.3e-09	1.35e-10	1.09077	SGCB
203336_s_at	4.34e-10	5.85e-12	1.09054	ITGB1BP1
227152_at	0.0009	0.000446	1.0904	KIAA1551
214768_x_at	0.0118	0.00754	1.08998	IGKC
203688_at	2.02e-08	8.07e-10	1.08996	PKD2
208703_s_at	8.49e-09	2.5e-10	1.0899	APLP2
218870_at	0.00113	0.000572	1.08984	LOC101928361
213306_at	3.79e-06	8.41e-07	1.08932	MPDZ
205226_at	9.41e-05	3.6e-05	1.08904	PDGFRL
1557051_s_at	2.38e-06	4.73e-07	1.08903	HOTAIRM1
209906_at	6.68e-08	4.06e-09	1.08893	C3AR1
203453_at	0.000602	0.000287	1.08886	SCNN1A
228946_at	2.31e-09	4.63e-11	1.0886	INTU
238868_at	3.69e-07	4.28e-08	1.08807	UACA
226416_at	6.81e-08	4.17e-09	1.08775	ERI1
242396_at	2.02e-08	8.07e-10	1.0876	NR2F2
203882_at	8.67e-08	5.86e-09	1.08748	IRF9
216598_s_at	0.00356	0.00203	1.08741	CCL2
213844_at	8.23e-07	1.24e-07	1.08725	HOXA5
1555136_at	1.43e-08	5.04e-10	1.08683	FGD6
219049_at	5e-06	1.18e-06	1.08646	CSGALNACT1
237411_at	1.14e-08	3.74e-10	1.08645	ADAMTS6
215039_at	6.55e-06	1.64e-06	1.08584	LINC01140
224414_s_at	4.64e-08	2.51e-09	1.08571	CARD6
211986_at	4.61e-08	2.5e-09	1.0857	AHNAK
212919_at	5.78e-07	7.82e-08	1.08545	DCP2
228095_at	4.95e-09	1.22e-10	1.08534	PHF14
227188_at	2.26e-07	2.21e-08	1.08528	EVA1C
230906_at	8.16e-10	1.29e-11	1.08488	GALNT10
203502_at	9.99e-09	3.13e-10	1.08445	BPGM
235074_at	3.3e-10	4.16e-12	1.08383	SPRED1
238534_at	1.38e-05	3.94e-06	1.08365	LRRFIP1
226464_at	1.16e-08	3.83e-10	1.08364	C3orf58
227662_at	0.00318	0.0018	1.08281	SYNPO2
226694_at	8.14e-06	2.13e-06	1.08231	PALM2-AKAP2
220918_at	6.42e-08	3.83e-09	1.08223	RUNX1-IT1
218319_at	8.84e-06	2.34e-06	1.08202	PELI1
212242_at	1.34e-07	1.08e-08	1.08161	TUBA4A
201560_at	1.77e-08	6.71e-10	1.08135	CLIC4
212582_at	1.88e-06	3.52e-07	1.08128	OSBPL8
201830_s_at	6.24e-07	8.66e-08	1.08112	NET1
218627_at	2.26e-09	4.51e-11	1.08048	DRAM1
201655_s_at	4.24e-12	1.94e-14	1.08045	HSPG2
224596_at	1.33e-09	2.34e-11	1.0804	SLC44A1
205765_at	0.0222	0.0149	1.0797	CYP3A5
218728_s_at	4.28e-08	2.27e-09	1.07913	CNIH4
201809_s_at	1.73e-08	6.47e-10	1.07857	ENG
225611_at	6.88e-08	4.22e-09	1.07798	MAST4
201887_at	1.38e-09	2.43e-11	1.07792	IL13RA1
210108_at	1.92e-05	5.8e-06	1.07782	CACNA1D
200661_at	1.78e-11	1.18e-13	1.07779	CTSA
204457_s_at	4.89e-05	1.71e-05	1.07767	GAS1
200638_s_at	4.95e-07	6.33e-08	1.0772	YWHAZ
204700_x_at	2.56e-10	3.08e-12	1.07691	DIEXF
209655_s_at	2.06e-10	2.31e-12	1.07669	TMEM47
228461_at	4.14e-11	3.35e-13	1.07648	SH3RF3
200989_at	6.42e-10	9.53e-12	1.07614	HIF1A
207419_s_at	0.0017	0.000899	1.07613	RAC2
202133_at	5.33e-08	3e-09	1.07537	WWTR1
202157_s_at	0.000346	0.000156	1.07533	CELF2
209125_at	0.00264	0.00146	1.07508	KRT6A
202598_at	6.18e-09	1.64e-10	1.07477	S100A13
226825_s_at	9.47e-08	6.61e-09	1.07473	TMEM165
201020_at	2.34e-10	2.78e-12	1.0746	YWHAH
209935_at	9.27e-12	5.31e-14	1.07428	ATP2C1
210105_s_at	3.91e-05	1.32e-05	1.07428	FYN
207198_s_at	9.87e-08	7.04e-09	1.07395	LIMS4
227125_at	6.39e-07	8.93e-08	1.07248	IFNAR2
210644_s_at	5.1e-07	6.6e-08	1.07129	LAIR1
225129_at	7.62e-09	2.16e-10	1.07115	CPNE2
211676_s_at	7.48e-06	1.92e-06	1.07115	IFNGR1
226280_at	1.08e-06	1.75e-07	1.07095	BNIP2
224895_at	1.73e-10	1.9e-12	1.07071	YAP1
202409_at	0.00166	0.000879	1.07057	INS-IGF2
202149_at	2.37e-05	7.4e-06	1.07031	NEDD9
40665_at	4.75e-05	1.65e-05	1.07023	FMO3
40148_at	2.31e-10	2.71e-12	1.06884	APBB2
243409_at	1.34e-08	4.58e-10	1.06873	FOXL1
216194_s_at	1.71e-11	1.13e-13	1.06848	TBCB
204913_s_at	6.69e-06	1.68e-06	1.06847	SOX11
218009_s_at	1.42e-06	2.48e-07	1.06826	PRC1
213238_at	2.62e-08	1.15e-09	1.0682	ATP10D
218918_at	4.16e-06	9.4e-07	1.06781	MAN1C1
32069_at	1.88e-07	1.71e-08	1.06766	N4BP1
243296_at	0.000391	0.000178	1.06737	NAMPT
212895_s_at	1.87e-09	3.54e-11	1.06732	ABR
209121_x_at	1.1e-07	8.24e-09	1.06705	NR2F2
209205_s_at	5.57e-11	4.89e-13	1.06704	LMO4
218677_at	0.000371	0.000168	1.06699	S100A14
216491_x_at	0.0131	0.00841	1.06625	IGHM
204963_at	1.36e-07	1.09e-08	1.06582	SSPN
235463_s_at	1.01e-06	1.62e-07	1.06571	CERS6
223218_s_at	3.92e-05	1.33e-05	1.06561	NFKBIZ
208891_at	2.47e-05	7.77e-06	1.06549	DUSP6
211063_s_at	4.14e-10	5.54e-12	1.06538	NCK1
237159_x_at	3.45e-07	3.91e-08	1.06535	AP1S3
202759_s_at	1.91e-05	5.76e-06	1.06501	PALM2-AKAP2
230640_at	1.62e-08	5.94e-10	1.06471	FMNL3
217795_s_at	2.75e-10	3.35e-12	1.06394	TMEM43
208170_s_at	0.0112	0.00708	1.06367	TRIM31
37512_at	0.00137	0.000712	1.0635	HSD17B6
212813_at	2.83e-08	1.27e-09	1.06297	JAM3
206227_at	0.00129	0.000664	1.0629	CILP
227068_at	4.4e-07	5.42e-08	1.0629	PGK1
244885_at	0.00219	0.00119	1.06273	EBF2
217480_x_at	0.00541	0.00321	1.06263	IGKV1OR2-118
242418_at	3.53e-10	4.56e-12	1.06239	C2orf27A
223374_s_at	7.96e-09	2.29e-10	1.06207	B3GALNT1
226799_at	1.59e-09	2.9e-11	1.06124	FGD6
204939_s_at	0.00197	0.00106	1.06113	PLN
217933_s_at	1.81e-05	5.42e-06	1.06075	LAP3
232213_at	1.31e-05	3.71e-06	1.06058	PELI1
209210_s_at	1.59e-06	2.85e-07	1.06038	FERMT2
219631_at	9.23e-11	8.75e-13	1.06036	LRP12
227514_at	1.24e-08	4.17e-10	1.06034	ITPRIPL2
219232_s_at	0.000122	4.83e-05	1.06013	EGLN3
201428_at	6.34e-05	2.3e-05	1.05948	CLDN4
AFFX-HUMISGF3A/M97935_3_at	1.59e-06	2.84e-07	1.05941	STAT1
225776_at	5.23e-12	2.52e-14	1.05911	RBMS2
209008_x_at	0.000443	0.000204	1.059	KRT8
211714_x_at	6.18e-10	9.14e-12	1.05789	TUBB
228483_s_at	2.93e-07	3.15e-08	1.05734	TAF9B
1569652_at	7.59e-08	4.87e-09	1.05733	MLLT3
202968_s_at	1.36e-08	4.71e-10	1.05725	DYRK2
225231_at	3.78e-07	4.42e-08	1.05707	CBL
222846_at	0.000157	6.41e-05	1.0569	RAB8B
213256_at	2.08e-07	1.97e-08	1.05655	MARCH3
1555579_s_at	1.23e-07	9.49e-09	1.05647	PTPRM
224618_at	3.81e-07	4.46e-08	1.05631	PTBP3
1552486_s_at	1.48e-07	1.23e-08	1.05617	LACTB
1554452_a_at	3.51e-08	1.72e-09	1.05607	HILPDA
222646_s_at	1.11e-05	3.07e-06	1.05604	ERO1A
205700_at	0.000971	0.000485	1.05596	HSD17B6
209307_at	8.92e-06	2.37e-06	1.05588	SWAP70
229095_s_at	1.54e-05	4.49e-06	1.05585	LOC100507334
202180_s_at	6.28e-09	1.67e-10	1.05446	MVP
225585_at	1.17e-06	1.94e-07	1.05446	RAP2A
203554_x_at	2.27e-05	7.05e-06	1.05445	PTTG1
204881_s_at	1.45e-06	2.54e-07	1.05413	UGCG
228299_at	1.75e-08	6.61e-10	1.05381	KCTD20
201389_at	5.34e-07	7.02e-08	1.05356	ITGA5
206364_at	1.19e-06	1.99e-07	1.05329	KIF14
212104_s_at	1.06e-11	6.33e-14	1.05298	RBFOX2
224796_at	2.1e-08	8.5e-10	1.05259	ASAP1
225566_at	1.06e-10	1.03e-12	1.0524	NRP2
202422_s_at	7.33e-08	4.65e-09	1.05235	ACSL4
210117_at	6.36e-09	1.7e-10	1.05206	SPAG1
227038_at	1.38e-05	3.94e-06	1.05204	SGMS2
212959_s_at	1.02e-08	3.24e-10	1.05174	GNPTAB
220230_s_at	7.02e-12	3.73e-14	1.05165	CYB5R2
1568619_s_at	6.6e-16	4.22e-19	1.05152	ITPRIPL2
200931_s_at	2.35e-08	9.88e-10	1.05094	VCL
218611_at	1.29e-05	3.64e-06	1.05059	IER5
219492_at	5.05e-08	2.8e-09	1.05015	CHIC2
225717_at	2.15e-08	8.77e-10	1.04999	LNPK
223405_at	2.13e-06	4.11e-07	1.04966	NPL
201664_at	4.47e-07	5.52e-08	1.04957	SMC4
227792_at	2.03e-15	1.67e-18	1.04948	ITPRIPL2
220615_s_at	1.05e-05	2.87e-06	1.04931	FAR2
213888_s_at	0.00148	0.000773	1.04919	TRAF3IP3
204976_s_at	3.61e-09	8.2e-11	1.04915	AMMECR1
1570259_at	6.34e-09	1.69e-10	1.0486	LIMS1
225841_at	1.61e-07	1.38e-08	1.04847	HENMT1
221978_at	8.92e-05	3.39e-05	1.04749	HLA-F
212651_at	1.85e-08	7.16e-10	1.04722	RHOBTB1
227462_at	0.00599	0.00359	1.04684	ERAP2
235911_at	8.67e-08	5.86e-09	1.04676	MELTF
213252_at	1.7e-11	1.11e-13	1.04658	SH3PXD2A
227727_at	0.000171	7.06e-05	1.04601	MRGPRF
238332_at	0.000428	0.000197	1.04546	ANKRD29
1553589_a_at	0.00034	0.000153	1.04424	PDZK1IP1
209493_at	4.51e-08	2.43e-09	1.04399	PDZD2
211798_x_at	0.00761	0.00465	1.04399	IGLJ3
209200_at	3.42e-05	1.13e-05	1.04349	MEF2C
215464_s_at	1.17e-09	2e-11	1.04282	P2RX5-TAX1BP3
224595_at	4.35e-09	1.04e-10	1.04272	SLC44A1
222853_at	0.000319	0.000142	1.04249	FLRT3
220416_at	6.79e-05	2.49e-05	1.04224	ATP8B4
223235_s_at	0.000917	0.000455	1.04195	SMOC2
220532_s_at	7.34e-06	1.88e-06	1.0415	TMEM176B
233085_s_at	0.000402	0.000183	1.04114	NABP1
201888_s_at	4.1e-09	9.64e-11	1.04056	IL13RA1
231822_at	6.88e-10	1.03e-11	1.04009	CTTNBP2NL
206247_at	3.06e-05	9.93e-06	1.0398	MICB
206335_at	2.95e-10	3.66e-12	1.03952	GALNS
203300_x_at	9.99e-06	2.7e-06	1.03935	AP1S2
204396_s_at	0.000435	0.000201	1.03921	GRK5
208250_s_at	0.0406	0.0288	1.03907	DMBT1
228729_at	1.98e-05	6.01e-06	1.03885	CCNB1
224955_at	9.2e-09	2.8e-10	1.03881	TEAD1
227372_s_at	0.000785	0.000384	1.03849	BAIAP2L1
224550_s_at	6.21e-07	8.61e-08	1.03846	MRVI1
235606_at	2.33e-10	2.74e-12	1.0383	DUBR
201818_at	8.78e-07	1.35e-07	1.03829	LPCAT1
229152_at	0.0234	0.0158	1.03784	FDCSP
202430_s_at	4.64e-07	5.82e-08	1.03749	PLSCR1
236293_at	0.0127	0.0081	1.03732	RHOH
204790_at	5.58e-08	3.19e-09	1.03706	SMAD7
230360_at	3.5e-05	1.16e-05	1.03687	GLDN
1555797_a_at	4.89e-07	6.23e-08	1.03662	ARPC5
229202_at	3.3e-10	4.17e-12	1.03635	PCNX2
219630_at	0.00134	0.000695	1.03629	PDZK1IP1
203764_at	0.000141	5.67e-05	1.03619	DLGAP5
223380_s_at	7.3e-09	2.04e-10	1.03594	LATS2
221489_s_at	6.44e-10	9.58e-12	1.03591	SPRY4
[truncated: 512 more rows]

## Sheet: GSE16515
ID	adj.P.Val	P.Value	logFC	Gene.symbol
204351_at	4.81e-09	8.8e-13	6.25801	S100P
201884_at	2.33e-07	3.33e-10	6.25257	CEACAM5
232578_at	1.19e-06	4.11e-09	5.262	CLDN18
214135_at	7.21e-07	1.83e-09	5.1483	CLDN18
202504_at	4.81e-09	7.12e-13	5.09358	TRIM29
203757_s_at	2.56e-06	1.27e-08	4.80396	CEACAM6
205009_at	1.28e-05	1.31e-07	4.68343	TFF1
209792_s_at	4.25e-07	7.95e-10	4.62785	KLK10
219795_at	9.65e-08	8.25e-11	4.62658	SLC6A14
205927_s_at	2.67e-07	4.06e-10	4.62087	CTSE
214974_x_at	8.3e-06	6.73e-08	4.61958	CXCL5
231646_at	1.12e-05	1.08e-07	4.57387	DPCR1
218960_at	1.14e-09	8.37e-14	4.50413	TMPRSS4
201650_at	1.61e-08	7.07e-12	4.47293	KRT19
221133_s_at	4.95e-06	3.3e-08	4.40972	CLDN18
204855_at	3.79e-08	2.92e-11	4.39284	SERPINB5
203108_at	1.13e-07	1.08e-10	4.31962	GPRC5A
37892_at	2.42e-06	1.17e-08	4.26526	COL11A1
211657_at	2.11e-06	9.84e-09	4.26003	CEACAM6
204885_s_at	3.21e-08	2.41e-11	4.25863	MSLN
33323_r_at	2.39e-08	1.36e-11	4.22556	SFN
223631_s_at	1.7e-07	2.18e-10	4.18528	C19orf33
238017_at	2.32e-08	1.27e-11	4.18474	SDR16C5
221132_at	2.73e-05	3.86e-07	4.03649	CLDN18
217109_at	9.34e-06	8.18e-08	4.01381	MUC4
202267_at	2.89e-08	2.07e-11	4.01339	LAMC2
209173_at	2.05e-08	1e-11	3.96986	AGR2
204320_at	2.81e-06	1.5e-08	3.94503	COL11A1
204602_at	1.03e-06	3.33e-09	3.87619	DKK1
212531_at	6.5e-06	4.87e-08	3.78675	LCN2
212444_at	2.33e-07	3.39e-10	3.77771	GPRC5A
205941_s_at	6.29e-06	4.69e-08	3.76944	COL10A1
1554436_a_at	0.00179	0.000252	3.75141	REG4
205319_at	5.11e-05	9.75e-07	3.7433	PSCA
241137_at	8.01e-05	1.83e-06	3.72339	DPCR1
209114_at	2.62e-08	1.65e-11	3.6883	TSPAN1
210519_s_at	5.08e-09	1.21e-12	3.6798	NQO1
209270_at	2.96e-10	1.52e-14	3.6739	LAMB3
215125_s_at	7.19e-06	5.58e-08	3.67006	UGT1A3
215101_s_at	0.000103	2.6e-06	3.66101	CXCL5
203559_s_at	1.12e-06	3.83e-09	3.63069	AOC1
229030_at	6.76e-07	1.55e-09	3.63003	CAPN8
205044_at	0.000164	5.1e-06	3.62085	GABRP
223278_at	1.68e-07	2.12e-10	3.58615	GJB2
219014_at	4.67e-06	3.06e-08	3.57918	PLAC8
33322_i_at	2.97e-08	2.17e-11	3.56219	SFN
212657_s_at	1.33e-08	4.63e-12	3.55513	IL1RN
228058_at	4.81e-09	6.83e-13	3.53866	ZG16B
211002_s_at	8.29e-09	2.12e-12	3.5036	TRIM29
206023_at	7.71e-07	2.15e-09	3.44244	NMU
203878_s_at	2.19e-06	1.04e-08	3.42506	MMP11
219727_at	0.000112	2.92e-06	3.39705	DUOX2
217428_s_at	1.37e-05	1.42e-07	3.36735	COL10A1
210095_s_at	4.25e-07	8.02e-10	3.36205	IGFBP3
206884_s_at	3.4e-06	1.97e-08	3.36035	SCEL
219508_at	1.03e-06	3.32e-09	3.35471	GCNT3
205476_at	9.93e-06	9e-08	3.34829	CCL20
202411_at	2.33e-07	3.32e-10	3.32958	IFI27
205513_at	0.000195	6.57e-06	3.32909	TCN1
212992_at	1.52e-06	5.94e-09	3.32779	AHNAK2
205157_s_at	1.03e-05	9.48e-08	3.32706	KRT17
203021_at	1.24e-08	3.86e-12	3.31295	SLPI
202831_at	3.81e-06	2.27e-08	3.30725	GPX2
203726_s_at	7.33e-07	1.95e-09	3.29136	LAMA3
209016_s_at	6.96e-07	1.66e-09	3.28726	KRT7
214476_at	0.000243	9.11e-06	3.28016	TFF2
210809_s_at	7.95e-05	1.81e-06	3.27973	POSTN
201467_s_at	1.6e-08	5.98e-12	3.27175	NQO1
243764_at	0.000303	1.28e-05	3.25878	VSIG1
210143_at	0.000249	9.5e-06	3.25099	ANXA10
211430_s_at	0.00309	0.000582	3.2447	MIR8071-2
209803_s_at	2.86e-07	4.69e-10	3.23688	PHLDA2
212236_x_at	3.81e-06	2.26e-08	3.22257	KRT17
203820_s_at	4.33e-06	2.73e-08	3.19524	IGF2BP3
214385_s_at	0.00012	3.22e-06	3.18571	MUC5AC
219580_s_at	1.88e-06	8.33e-09	3.17936	TMC5
202856_s_at	1.51e-07	1.8e-10	3.16981	MIR6787
228923_at	1.77e-07	2.29e-10	3.16751	S100A6
209498_at	1.79e-07	2.36e-10	3.16332	CEACAM1
240304_s_at	6.03e-06	4.4e-08	3.15045	TMC5
205466_s_at	2.74e-07	4.42e-10	3.14524	HS3ST1
227140_at	2.43e-05	3.27e-07	3.14086	INHBA
210511_s_at	9.77e-06	8.8e-08	3.13496	INHBA
204580_at	0.000523	3.06e-05	3.11681	MMP12
244056_at	4.41e-06	2.83e-08	3.11429	SFTA2
202489_s_at	1.28e-07	1.28e-10	3.10047	FXYD3
219404_at	1.27e-06	4.58e-09	3.0999	EPS8L3
207517_at	4.14e-07	7.58e-10	3.0936	LAMC2
207126_x_at	4.57e-05	8.2e-07	3.07776	UGT1A1
201250_s_at	2.96e-10	1.63e-14	3.05336	SLC2A1
203819_s_at	1.67e-05	1.91e-07	3.05287	IGF2BP3
202859_x_at	4.89e-05	9.17e-07	3.04042	CXCL8
206224_at	0.000461	2.48e-05	3.03828	CST1
222904_s_at	1.45e-06	5.35e-09	3.02766	TMC5
224009_x_at	0.000216	7.65e-06	3.02148	DHRS9
227314_at	2.08e-08	1.06e-11	3.003	ITGA2
212143_s_at	2.03e-07	2.75e-10	2.99604	IGFBP3
204475_at	0.000463	2.5e-05	2.96071	MMP1
239370_at	4.64e-05	8.35e-07	2.95782	LINC01133
205597_at	4.28e-06	2.68e-08	2.95184	SLC44A4
208596_s_at	4.41e-05	7.72e-07	2.94859	UGT1A3
204614_at	0.000204	7.05e-06	2.94073	SERPINB2
217110_s_at	0.000116	3.07e-06	2.92539	MUC4
204268_at	0.000172	5.48e-06	2.91494	S100A2
209950_s_at	1.06e-06	3.52e-09	2.91404	VILL
212354_at	5.31e-05	1.03e-06	2.91086	SULF1
41469_at	5.01e-05	9.47e-07	2.90846	PI3
225436_at	1.6e-08	6.17e-12	2.89582	ABHD17C
223952_x_at	0.00028	1.14e-05	2.87812	DHRS9
201468_s_at	1.51e-07	1.83e-10	2.87563	NQO1
222592_s_at	2.58e-05	3.56e-07	2.87057	ACSL5
236129_at	2.62e-08	1.68e-11	2.86282	GALNT5
206560_s_at	2.86e-06	1.54e-08	2.86048	MIA
203074_at	0.00015	4.53e-06	2.8578	ANXA8L1
223748_at	2.05e-08	1.01e-11	2.85721	SLC4A11
223949_at	2.74e-07	4.38e-10	2.85693	TMPRSS3
230323_s_at	1.11e-05	1.07e-07	2.84462	TMEM45B
206482_at	2.62e-08	1.68e-11	2.84295	PTK6
204653_at	1.39e-07	1.55e-10	2.84273	TFAP2A
227725_at	0.000141	4.17e-06	2.84121	ST6GALNAC1
205076_s_at	2.67e-06	1.36e-08	2.82933	MTMR11
213796_at	0.00754	0.00207	2.82899	SPRR1A
219911_s_at	5.71e-06	4.11e-08	2.81682	SLCO4A1
205455_at	1.51e-07	1.79e-10	2.80461	MST1R
232165_at	2.56e-06	1.28e-08	2.79597	EPPK1
212353_at	6.16e-05	1.24e-06	2.79375	SULF1
1555778_a_at	0.000109	2.79e-06	2.79027	POSTN
209260_at	1.35e-07	1.47e-10	2.78469	SFN
212942_s_at	4.01e-06	2.44e-08	2.78463	CEMIP
206094_x_at	8.76e-05	2.07e-06	2.78107	UGT1A3
228969_at	3.29e-05	5.06e-07	2.7722	AGR2
244780_at	1.35e-07	1.41e-10	2.77137	SGPP2
218211_s_at	4.75e-07	9.3e-10	2.74808	MLPH
205479_s_at	1.92e-05	2.32e-07	2.7324	PLAU
225681_at	0.000267	1.06e-05	2.73089	CTHRC1
231148_at	9.77e-06	8.79e-08	2.72895	IGFL2
203691_at	2.73e-05	3.87e-07	2.71663	PI3
202934_at	1.25e-08	4.13e-12	2.71613	HK2
220468_at	0.000311	1.34e-05	2.69991	ARL14
221665_s_at	1.82e-06	7.91e-09	2.69696	EPS8L1
214303_x_at	0.000672	4.62e-05	2.69189	MUC5AC
217728_at	7.33e-07	1.93e-09	2.68377	S100A6
203256_at	7.33e-07	1.93e-09	2.68259	CDH3
203876_s_at	1.92e-05	2.31e-07	2.6723	MMP11
218677_at	1.02e-06	3.24e-09	2.66432	S100A14
219787_s_at	2.89e-08	1.99e-11	2.65836	ECT2
222608_s_at	5.32e-08	4.28e-11	2.65684	ANLN
241994_at	4.64e-05	8.33e-07	2.65574	XDH
228707_at	1.59e-05	1.77e-07	2.65443	CLDN23
211506_s_at	0.000269	1.07e-05	2.65416	CXCL8
203892_at	2.86e-07	4.83e-10	2.65329	WFDC2
229927_at	1.19e-05	1.17e-07	2.65144	LEMD1
205032_at	1.13e-07	1.07e-10	2.64911	ITGA2
240303_at	1.1e-05	1.05e-07	2.6388	TMC5
205660_at	2.74e-07	4.32e-10	2.63303	OASL
201286_at	2.96e-10	1.62e-14	2.62872	SDC1
228232_s_at	1e-05	9.1e-08	2.6206	VSIG2
222712_s_at	0.000119	3.16e-06	2.61471	MUC13
205064_at	0.00243	0.000404	2.60958	SPRR1B
239381_at	0.000407	2.01e-05	2.6052	KLK7
223484_at	1.19e-07	1.15e-10	2.60511	C15orf48
218990_s_at	0.00444	0.000988	2.60031	SPRR3
227475_at	2.26e-07	3.14e-10	2.59486	FOXQ1
203510_at	3.93e-09	3.6e-13	2.58989	MET
217755_at	5.82e-07	1.24e-09	2.58876	HN1
205342_s_at	0.00045	2.38e-05	2.58818	SULT1C2
218963_s_at	0.00143	0.000173	2.5868	KRT23
204733_at	0.000778	5.97e-05	2.57752	KLK6
204532_x_at	0.000167	5.27e-06	2.57443	UGT1A1
238439_at	5.14e-06	3.48e-08	2.57367	ANKRD22
218687_s_at	2.08e-05	2.64e-07	2.56998	MUC13
232164_s_at	8.84e-06	7.53e-08	2.56426	EPPK1
220658_s_at	3e-07	5.32e-10	2.56182	ARNTL2
209373_at	4.37e-05	7.58e-07	2.55839	MALL
204272_at	0.00026	1.01e-05	2.55609	LGALS4
201291_s_at	1.52e-06	5.93e-09	2.55444	TOP2A
205081_at	2.77e-06	1.46e-08	2.55314	CRIP1
212464_s_at	7.73e-06	6.2e-08	2.55303	FN1
1555950_a_at	2.56e-06	1.28e-08	2.55185	CD55
232056_at	4.13e-05	7.03e-07	2.53519	SCEL
220030_at	2.55e-08	1.49e-11	2.53492	STYK1
231766_s_at	4.78e-05	8.86e-07	2.53323	COL12A1
91826_at	3.02e-06	1.63e-08	2.53051	EPS8L1
216442_x_at	6.99e-06	5.39e-08	2.53018	FN1
218779_x_at	5.82e-07	1.23e-09	2.52369	EPS8L1
208126_s_at	5.8e-05	1.14e-06	2.52111	CYP2C18
202855_s_at	6.96e-07	1.68e-09	2.51908	MIR6787
238689_at	2.7e-06	1.4e-08	2.51537	ADGRF1
204636_at	6.42e-05	1.31e-06	2.51312	COL17A1
202145_at	7.61e-06	6.04e-08	2.50976	LY6E
226237_at	0.000476	2.61e-05	2.50966	COL8A1
209212_s_at	1.95e-05	2.39e-07	2.50842	KLF5
201925_s_at	7.01e-07	1.71e-09	2.50543	CD55
227566_at	8.62e-05	2.02e-06	2.50227	LOC102725271
204415_at	3.84e-05	6.36e-07	2.50058	IFI6
211470_s_at	0.000586	3.7e-05	2.49662	SULT1C2
201926_s_at	1.63e-06	6.71e-09	2.49091	CD55
221558_s_at	0.000116	3.08e-06	2.4865	LEF1
205490_x_at	4.94e-09	9.96e-13	2.47963	GJB3
203824_at	2.05e-07	2.82e-10	2.47829	TSPAN8
224428_s_at	8.72e-06	7.26e-08	2.47737	CDCA7
219529_at	3.13e-06	1.73e-08	2.47659	CLIC3
217388_s_at	2.68e-05	3.76e-07	2.46795	KYNU
218644_at	9.65e-08	8.48e-11	2.46572	PLEK2
211924_s_at	2.87e-07	5e-10	2.44932	PLAUR
211719_x_at	1.03e-05	9.51e-08	2.44121	FN1
209324_s_at	2.82e-05	4.03e-07	2.44018	RGS16
219799_s_at	0.000522	3.05e-05	2.43396	DHRS9
208250_s_at	0.00413	0.00089	2.42733	DMBT1
204259_at	0.000822	6.54e-05	2.41861	MMP7
212344_at	0.000145	4.29e-06	2.41814	SULF1
205552_s_at	8.64e-07	2.55e-09	2.41811	OAS1
204714_s_at	3.63e-05	5.84e-07	2.41783	F5
228846_at	4.75e-07	9.3e-10	2.41453	MXD1
223779_at	3.81e-06	2.27e-08	2.40654	AFAP1-AS1
222847_s_at	7.21e-06	5.62e-08	2.40561	EGLN3
236044_at	2.18e-05	2.83e-07	2.40514	PLPP4
1555203_s_at	3.13e-05	4.68e-07	2.39955	SLC44A4
209365_s_at	2.15e-05	2.77e-07	2.39708	ECM1
1556034_s_at	4.71e-06	3.11e-08	2.39638	MTMR11
212488_at	0.00061	3.95e-05	2.39295	COL5A1
208937_s_at	7.04e-07	1.77e-09	2.38649	ID1
206561_s_at	0.0027	0.000475	2.38585	AKR1B10
205780_at	1.61e-08	6.88e-12	2.38573	BIK
219429_at	2.05e-06	9.41e-09	2.37062	FA2H
210495_x_at	9.06e-06	7.86e-08	2.3704	FN1
201292_at	7.55e-07	2.09e-09	2.36406	TOP2A
209773_s_at	1.38e-05	1.45e-07	2.35309	RRM2
219010_at	1.62e-06	6.59e-09	2.35134	C1orf106
225342_at	1.21e-05	1.2e-07	2.34937	LOC100507855
221655_x_at	1.64e-06	6.88e-09	2.34853	EPS8L1
219232_s_at	1.31e-05	1.35e-07	2.34841	EGLN3
224204_x_at	1.62e-07	2.02e-10	2.34398	ARNTL2
202869_at	4.37e-05	7.62e-07	2.34348	OAS1
213680_at	0.00469	0.00107	2.3422	KRT6B
209125_at	0.00422	0.00092	2.33728	KRT6A
204895_x_at	0.000548	3.31e-05	2.33493	MUC4
204678_s_at	1.52e-06	5.87e-09	2.33456	KCNK1
225664_at	8.53e-05	2e-06	2.32931	COL12A1
204990_s_at	5.82e-07	1.23e-09	2.32797	ITGB4
226560_at	1.64e-06	6.84e-09	2.32529	SGPP2
220177_s_at	2.49e-06	1.22e-08	2.32369	TMPRSS3
209719_x_at	0.00143	0.000173	2.31704	SERPINB3
219773_at	9.5e-05	2.31e-06	2.31545	NOX4
201428_at	1.78e-08	8.13e-12	2.31477	CLDN4
233565_s_at	1.23e-05	1.25e-07	2.31454	FKBP1A-SDCBP2
207850_at	0.000181	5.94e-06	2.31366	CXCL3
224252_s_at	7.03e-05	1.51e-06	2.31348	FXYD5
227253_at	0.00189	0.000274	2.31015	CP
235871_at	7.21e-07	1.84e-09	2.30876	LIPH
239273_s_at	5.42e-05	1.05e-06	2.3082	MMP28
233814_at	1.43e-06	5.24e-09	2.30713	EFNA5
218804_at	9.61e-05	2.35e-06	2.30187	ANO1
207847_s_at	0.000459	2.46e-05	2.299	MUC1
202286_s_at	3.43e-05	5.42e-07	2.2985	TACSTD2
202998_s_at	5.53e-06	3.91e-08	2.29268	LOXL2
204348_s_at	5.16e-06	3.52e-08	2.29107	LOC100507855
204846_at	0.00308	0.00058	2.28743	CP
215444_s_at	1.28e-05	1.32e-07	2.28719	TRIM31
205483_s_at	2.08e-05	2.62e-07	2.28565	ISG15
200660_at	6.56e-07	1.48e-09	2.28216	S100A11
201474_s_at	1.25e-06	4.41e-09	2.28004	ITGA3
242271_at	0.00177	0.000246	2.27216	SLC26A9
215034_s_at	2.87e-07	4.97e-10	2.27007	TM4SF1
212925_at	2.74e-06	1.44e-08	2.26224	MISP
214710_s_at	1.05e-06	3.48e-09	2.26097	CCNB1
206858_s_at	3.84e-05	6.31e-07	2.26077	HOXC6
229271_x_at	0.000164	5.13e-06	2.25895	COL11A1
205538_at	1.84e-06	8.1e-09	2.25891	CORO2A
227177_at	1.19e-05	1.17e-07	2.25871	CORO2A
202870_s_at	4.17e-05	7.14e-07	2.25613	CDC20
1555731_a_at	5.08e-09	1.21e-12	2.25511	AP1S3
60474_at	7.04e-07	1.75e-09	2.25391	FERMT1
203186_s_at	2.82e-05	4.04e-07	2.25382	S100A4
238542_at	2.19e-06	1.04e-08	2.25225	ULBP2
209211_at	9.74e-06	8.74e-08	2.24903	KLF5
204378_at	3.9e-06	2.35e-08	2.24857	BCAS1
202086_at	0.000119	3.18e-06	2.24766	MX1
230493_at	5.29e-06	3.67e-08	2.24385	SHISA2
204401_at	4.45e-07	8.47e-10	2.24002	KCNN4
210004_at	0.000702	4.98e-05	2.23246	OLR1
1552619_a_at	1.35e-07	1.43e-10	2.23152	ANLN
229802_at	0.000901	7.71e-05	2.23058	WISP1
201850_at	8.56e-06	7.07e-08	2.22904	CAPG
211668_s_at	4.78e-05	8.87e-07	2.22173	PLAU
232105_at	1.03e-07	9.42e-11	2.2212	BLACAT1
227955_s_at	2.88e-08	1.9e-11	2.21231	EFNA5
205778_at	0.00131	0.000149	2.2118	KLK7
210845_s_at	3.86e-07	6.92e-10	2.20615	PLAUR
205220_at	0.000889	7.51e-05	2.20269	HCAR3
234370_at	0.00195	0.000288	2.2007	VSIG1
228640_at	0.000235	8.68e-06	2.19588	PCDH7
213432_at	0.000913	7.85e-05	2.19244	MUC5B
209679_s_at	1.22e-08	3.56e-12	2.19216	SMAGP
228241_at	0.00283	0.000513	2.19082	AGR3
204641_at	1.12e-06	3.82e-09	2.18587	NEK2
213338_at	0.000116	3.06e-06	2.18547	TMEM158
202949_s_at	1.27e-05	1.29e-07	2.18402	FHL2
231879_at	0.000226	8.18e-06	2.18313	COL12A1
203083_at	0.000424	2.16e-05	2.1819	THBS2
204679_at	1.64e-06	6.88e-09	2.17955	KCNK1
203903_s_at	0.000921	7.99e-05	2.17882	HEPH
213078_x_at	1.56e-06	6.24e-09	2.1761	LPCAT4
201287_s_at	4.81e-09	8.43e-13	2.17603	SDC1
220017_x_at	0.000506	2.89e-05	2.17573	CYP2C9
214088_s_at	4.42e-06	2.84e-08	2.17547	FUT3
205681_at	0.000237	8.79e-06	2.17104	BCL2A1
227609_at	9.5e-05	2.31e-06	2.17033	EPSTI1
210052_s_at	5.96e-07	1.29e-09	2.16737	TPX2
214290_s_at	1.49e-05	1.63e-07	2.16715	HIST2H2AA4
219918_s_at	4.95e-06	3.3e-08	2.16643	ASPM
208170_s_at	2.41e-05	3.23e-07	2.16357	TRIM31
204698_at	0.00026	1.01e-05	2.16288	ISG20
1558034_s_at	0.0026	0.000451	2.16041	CP
1555745_a_at	0.00555	0.00137	2.15906	LYZ
1555326_a_at	3.13e-06	1.73e-08	2.158	ADAM9
204779_s_at	6.86e-06	5.25e-08	2.15789	HOXB7
225750_at	1.61e-08	6.71e-12	2.1572	ERO1A
205713_s_at	0.00399	0.000845	2.15586	COMP
226961_at	5.28e-06	3.64e-08	2.15506	PRR15
218796_at	9.48e-07	2.92e-09	2.15009	FERMT1
218469_at	0.00143	0.000173	2.14553	GREM1
211571_s_at	0.00101	9.5e-05	2.14009	VCAN
228302_x_at	3.34e-05	5.2e-07	2.13938	CAMK2N1
202311_s_at	0.000583	3.66e-05	2.13926	COL1A1
203213_at	5.82e-07	1.21e-09	2.13863	CDK1
237183_at	1.47e-05	1.6e-07	2.13625	GALNT5
202404_s_at	0.000511	2.93e-05	2.13581	COL1A2
211372_s_at	9.5e-05	2.31e-06	2.13417	IL1R2
219630_at	0.000277	1.12e-05	2.13243	PDZK1IP1
229218_at	0.00179	0.000252	2.13227	COL1A2
239272_at	1.31e-05	1.36e-07	2.12975	MMP28
226226_at	9.04e-05	2.17e-06	2.12792	TMEM45B
218084_x_at	8.01e-05	1.83e-06	2.12721	FXYD5
205819_at	0.00046	2.46e-05	2.12133	MARCO
205302_at	0.0071	0.00191	2.11711	IGFBP1
201169_s_at	1.5e-06	5.69e-09	2.1163	BHLHE40
229491_at	2.49e-06	1.23e-08	2.11528	SLC9B2
239196_at	2.94e-07	5.17e-10	2.11285	ANKRD22
227998_at	9.73e-08	8.73e-11	2.11003	S100A16
213909_at	0.000212	7.43e-06	2.10893	LRRC15
204170_s_at	5.2e-06	3.55e-08	2.10789	CKS2
213693_s_at	0.000187	6.22e-06	2.10686	MUC1
201037_at	1.05e-06	3.48e-09	2.10583	PFKP
224650_at	5.82e-07	1.2e-09	2.10253	MAL2
204713_s_at	0.000105	2.67e-06	2.10232	F5
206576_s_at	3.1e-06	1.7e-08	2.1001	CEACAM1
238567_at	2.1e-06	9.7e-09	2.09815	SGPP2
232321_at	0.00378	0.000782	2.09577	MUC17
200644_at	1.84e-07	2.46e-10	2.09265	MARCKSL1
209800_at	0.0002	6.82e-06	2.09164	KRT16
202310_s_at	0.00118	0.000125	2.09145	COL1A1
202708_s_at	6.11e-05	1.22e-06	2.08897	HIST2H2BE
226726_at	2.86e-07	4.82e-10	2.08525	MBOAT2
213150_at	7.78e-05	1.73e-06	2.08074	HOXA10
219434_at	1.28e-05	1.31e-07	2.07986	TREM1
204623_at	0.00303	0.000566	2.07971	TFF3
203764_at	7.33e-07	1.91e-09	2.07904	DLGAP5
202488_s_at	2.6e-06	1.3e-08	2.07439	FXYD3
204702_s_at	4.18e-07	7.73e-10	2.07117	NFE2L3
204972_at	0.00018	5.89e-06	2.07093	OAS2
223385_at	0.000725	5.31e-05	2.06801	CYP2S1
211883_x_at	1.12e-06	3.84e-09	2.06617	CEACAM1
1552502_s_at	2.61e-07	3.92e-10	2.06496	RHBDL2
205403_at	0.0003	1.27e-05	2.06179	IL1R2
204439_at	0.00104	9.92e-05	2.05398	IFI44L
203554_x_at	1.82e-05	2.13e-07	2.05347	PTTG1
202668_at	8.57e-06	7.11e-08	2.05288	EFNB2
227342_s_at	1.23e-05	1.24e-07	2.04897	MYEOV
205890_s_at	0.00097	8.72e-05	2.04743	UBD
215103_at	0.000245	9.26e-06	2.04218	CYP2C18
227919_at	0.00045	2.38e-05	2.04125	UCA1
229369_at	3.37e-05	5.31e-07	2.03821	VSIG2
202669_s_at	3.28e-05	5.03e-07	2.03801	EFNB2
208510_s_at	4.73e-05	8.72e-07	2.0368	PPARG
226622_at	0.000268	1.06e-05	2.03351	MUC20
227230_s_at	0.000168	5.32e-06	2.03328	KIAA1211
211026_s_at	5.4e-06	3.78e-08	2.03149	MGLL
225102_at	1.2e-05	1.19e-07	2.02798	MGLL
207828_s_at	9.15e-07	2.77e-09	2.02767	CENPF
201890_at	6.38e-06	4.77e-08	2.02716	RRM2
204825_at	1.5e-06	5.71e-09	2.02705	MELK
203499_at	1.07e-05	1.01e-07	2.02333	EPHA2
236179_at	0.000273	1.1e-05	2.02322	CDH11
204989_s_at	1.96e-05	2.41e-07	2.02244	ITGB4
206084_at	9.75e-05	2.39e-06	2.02242	PTPRR
209911_x_at	1.92e-05	2.33e-07	2.02017	HIST1H2BD
221730_at	0.000981	8.93e-05	2.01773	COL5A2
209642_at	7.04e-07	1.76e-09	2.01524	BUB1
205376_at	7.06e-05	1.51e-06	2.01351	INPP4B
205767_at	0.00104	9.94e-05	2.01133	EREG
210663_s_at	3.36e-05	5.25e-07	2.01101	KYNU
218542_at	1.35e-07	1.4e-10	2.01017	CEP55
205997_at	0.000124	3.38e-06	2.01005	ADAM28
227371_at	2.17e-06	1.03e-08	2.00823	BAIAP2L1
205648_at	1.87e-05	2.24e-07	2.00761	WNT2
218468_s_at	0.00189	0.000275	2.00677	GREM1
238021_s_at	1.69e-05	1.94e-07	2.00412	CRNDE
209924_at	0.00224	0.000356	2.00391	CCL18
221731_x_at	0.000912	7.84e-05	2.00079	VCAN
211518_s_at	1.42e-06	5.2e-09	2.00071	BMP4
212489_at	0.00049	2.75e-05	2.00064	COL5A1
222646_s_at	5.28e-06	3.64e-08	2.0003	ERO1A
215646_s_at	0.000989	9.1e-05	1.99851	VCAN
218039_at	1.58e-06	6.35e-09	1.99556	NUSAP1
209387_s_at	2.74e-07	4.29e-10	1.99314	TM4SF1
229538_s_at	5.98e-07	1.3e-09	1.99201	IQGAP3
213843_x_at	4.15e-05	7.1e-07	1.98928	SLC6A8
202528_at	8.69e-08	7.16e-11	1.98277	GALE
205239_at	0.00022	7.85e-06	1.98267	AREG
225687_at	0.00127	0.000142	1.98135	FAM83D
242234_at	8.73e-06	7.35e-08	1.97919	XAF1
204620_s_at	0.000761	5.76e-05	1.97808	VCAN
223229_at	8.7e-07	2.58e-09	1.97695	UBE2T
205891_at	1e-05	9.15e-08	1.97468	ADORA2B
209218_at	2.05e-05	2.58e-07	1.97047	SQLE
206276_at	0.00353	0.000708	1.96805	LY6D
207173_x_at	0.00146	0.000181	1.96668	CDH11
227452_at	9.83e-07	3.1e-09	1.96366	LINC00673
205199_at	0.00196	0.00029	1.96168	CA9
216973_s_at	5.14e-06	3.49e-08	1.96068	HOXB7
235153_at	1.95e-05	2.39e-07	1.95863	RNF183
204533_at	0.000707	5.07e-05	1.9556	CXCL10
211597_s_at	0.00192	0.00028	1.95368	HOPX
242625_at	0.000529	3.13e-05	1.9533	RSAD2
40472_at	6.06e-06	4.46e-08	1.95277	LPCAT4
205668_at	3.25e-05	4.93e-07	1.95243	LY75
206043_s_at	0.000113	2.98e-06	1.95119	ATP2C2
226545_at	0.000196	6.63e-06	1.95081	CD109
232231_at	0.000805	6.32e-05	1.94776	RUNX2
209546_s_at	1.82e-06	7.88e-09	1.94697	APOL1
204619_s_at	0.000941	8.27e-05	1.94616	VCAN
215033_at	0.000468	2.55e-05	1.94447	TM4SF1
228706_s_at	0.000112	2.92e-06	1.94369	CLDN23
239332_at	0.00262	0.000456	1.94201	LOC105371809
203214_x_at	4.58e-06	2.96e-08	1.9379	CDK1
205534_at	4.53e-05	8.06e-07	1.93773	PCDH7
216623_x_at	1.06e-05	9.92e-08	1.93694	TOX3
202912_at	0.000457	2.44e-05	1.93662	ADM
206439_at	0.00842	0.00241	1.9366	EPYC
210608_s_at	1.64e-05	1.86e-07	1.93355	FUT2
210559_s_at	4.33e-06	2.72e-08	1.93286	CDK1
202219_at	2.03e-05	2.52e-07	1.93026	SLC6A8
209369_at	1.47e-06	5.48e-09	1.93015	ANXA3
203913_s_at	0.000726	5.35e-05	1.92611	HPGD
211905_s_at	2.66e-05	3.73e-07	1.92592	ITGB4
210675_s_at	9.16e-05	2.2e-06	1.92564	PTPRR
218280_x_at	4.65e-05	8.39e-07	1.92545	HIST2H2AA4
218322_s_at	0.000196	6.6e-06	1.92449	ACSL5
214581_x_at	7.53e-07	2.05e-09	1.92396	TNFRSF21
218498_s_at	8.59e-07	2.52e-09	1.92376	ERO1A
211548_s_at	0.00112	0.000116	1.92257	HPGD
207172_s_at	0.00105	0.000101	1.92215	CDH11
238103_at	0.0113	0.00358	1.9176	LINC01207
224762_at	9.04e-07	2.72e-09	1.91643	SERINC2
220638_s_at	4.73e-05	8.65e-07	1.91256	CBLC
229777_at	0.00414	0.000894	1.90986	CLRN3
219789_at	0.000176	5.69e-06	1.90939	NPR3
203914_x_at	0.00213	0.000331	1.90666	HPGD
209955_s_at	0.00281	0.000508	1.90464	FAP
213288_at	1.27e-06	4.53e-09	1.90185	MBOAT2
1553589_a_at	0.000376	1.78e-05	1.8998	PDZK1IP1
204994_at	4.02e-05	6.77e-07	1.89966	MX2
242722_at	3.22e-06	1.81e-08	1.89844	LMO7
215243_s_at	9.65e-08	8.43e-11	1.89628	GJB3
209720_s_at	0.00416	0.000901	1.8953	SERPINB3
209847_at	0.00905	0.00266	1.89523	CDH17
232151_at	4.08e-06	2.51e-08	1.89457	MACC1
229555_at	2.29e-06	1.1e-08	1.89401	GALNT5
218186_at	0.000111	2.91e-06	1.89199	RAB25
205190_at	3.17e-05	4.75e-07	1.89086	PLS1
223939_at	0.000791	6.13e-05	1.89078	SUCNR1
226777_at	0.00432	0.000952	1.89071	ADAM12
243409_at	8.92e-05	2.13e-06	1.8899	FOXL1
200923_at	7.63e-06	6.08e-08	1.8872	LGALS3BP
213797_at	0.000499	2.83e-05	1.88586	RSAD2
208209_s_at	5.12e-05	9.78e-07	1.88057	C4BPB
219054_at	6.59e-05	1.37e-06	1.8797	NPR3
223948_s_at	2.13e-06	1e-08	1.87771	TMPRSS3
1552365_at	0.000564	3.46e-05	1.87725	SCIN
204116_at	0.000277	1.12e-05	1.87264	IL2RG
218883_s_at	8.84e-06	7.55e-08	1.87251	CENPU
1558216_at	0.000177	5.74e-06	1.87221	AFAP1-AS1
209386_at	1.59e-07	1.95e-10	1.86935	TM4SF1
218856_at	6.76e-07	1.57e-09	1.86869	TNFRSF21
226997_at	0.00022	7.9e-06	1.86832	ADAMTS12
221729_at	0.000775	5.92e-05	1.86673	COL5A2
238617_at	0.00085	6.95e-05	1.85866	KIF26B
226067_at	0.0143	0.00484	1.85775	BPIFB1
222396_at	1.54e-06	6.02e-09	1.85764	HN1
219684_at	2.49e-06	1.23e-08	1.85744	RTP4
219476_at	4.4e-05	7.69e-07	1.85679	C1orf116
222848_at	7.12e-06	5.52e-08	1.85632	CENPK
201798_s_at	1.45e-05	1.55e-07	1.85489	MYOF
220106_at	0.000204	7.02e-06	1.85315	NPC1L1
227014_at	2.24e-05	2.92e-07	1.85285	ASPHD2
228531_at	6.03e-06	4.42e-08	1.85097	SAMD9
213668_s_at	8.84e-06	7.52e-08	1.85084	SOX4
206364_at	9.71e-07	3.02e-09	1.84972	KIF14
214774_x_at	2.58e-05	3.57e-07	1.84871	TOX3
211864_s_at	2.37e-05	3.14e-07	1.84711	MYOF
202381_at	8.41e-07	2.45e-09	1.84661	ADAM9
231941_s_at	0.000529	3.12e-05	1.84604	MUC20
223586_at	1.05e-06	3.44e-09	1.84535	ARNTL2
228617_at	0.000105	2.69e-06	1.84471	XAF1
223509_at	0.000813	6.41e-05	1.84049	CLDN2
211695_x_at	0.000226	8.2e-06	1.83986	MUC1
230710_at	1.17e-06	4.04e-09	1.8367	MIR210HG
204444_at	2.69e-06	1.4e-08	1.8359	KIF11
219148_at	0.000104	2.61e-06	1.83538	PBK
208025_s_at	0.000808	6.35e-05	1.83344	HMGA2
209626_s_at	7.39e-06	5.8e-08	1.8294	OSBPL3
207202_s_at	0.00166	0.000221	1.82757	NR1I2
219936_s_at	0.00103	9.85e-05	1.82634	GPR87
1555137_a_at	8.73e-09	2.4e-12	1.82568	FGD6
228754_at	7.62e-05	1.68e-06	1.82532	SLC6A6
210854_x_at	6.17e-05	1.24e-06	1.82194	SLC6A8
209627_s_at	1.23e-06	4.27e-09	1.8104	OSBPL3
206199_at	0.0206	0.00776	1.8067	CEACAM7
218400_at	4.91e-05	9.23e-07	1.8065	OAS3
204748_at	0.0011	0.000111	1.80516	PTGS2
217234_s_at	1.42e-06	5.21e-09	1.80138	EZR
214702_at	0.000222	7.96e-06	1.80074	FN1
219233_s_at	2.37e-05	3.15e-07	1.79881	GSDMB
227862_at	1.19e-05	1.17e-07	1.7986	TRNP1
205765_at	0.000732	5.42e-05	1.79838	CYP3A5
226311_at	0.00191	0.000278	1.79819	ADAMTS2
228904_at	3.9e-05	6.48e-07	1.79738	HOXB3
200872_at	1.55e-06	6.15e-09	1.79649	S100A10
225834_at	1.6e-05	1.78e-07	1.79599	FAM72A
241140_at	3.98e-06	2.41e-08	1.79571	LMO7
227015_at	4.06e-05	6.87e-07	1.79568	ASPHD2
230615_at	0.00311	0.000589	1.7955	DUOXA2
204256_at	1.95e-05	2.39e-07	1.79549	ELOVL6
209596_at	0.000345	1.55e-05	1.79452	MXRA5
218009_s_at	7.21e-07	1.85e-09	1.79285	PRC1
219073_s_at	8.42e-06	6.87e-08	1.79252	OSBPL10
200832_s_at	0.000227	8.26e-06	1.79115	SCD
223381_at	7.21e-06	5.61e-08	1.79102	NUF2
200800_s_at	0.000431	2.21e-05	1.7892	HSPA1L
220289_s_at	5.14e-06	3.49e-08	1.78842	AIM1L
210827_s_at	3.21e-05	4.85e-07	1.7884	ELF3
226292_at	0.000384	1.84e-05	1.78713	CAPN5
32128_at	0.00309	0.000582	1.7869	CCL18
235476_at	5.56e-06	3.97e-08	1.78441	TRIM59
213880_at	0.00152	0.000191	1.78387	LGR5
203287_at	4.22e-06	2.62e-08	1.78355	LAD1
201042_at	0.00232	0.000378	1.78319	TGM2
208621_s_at	5.29e-06	3.67e-08	1.78165	EZR
229964_at	0.000312	1.35e-05	1.78114	C9orf152
219439_at	1.35e-07	1.48e-10	1.77755	C1GALT1
213577_at	0.000165	5.18e-06	1.77752	SQLE
1555733_s_at	2.89e-08	2.05e-11	1.77648	AP1S3
1566766_a_at	2.11e-06	9.83e-09	1.77645	MACC1
219691_at	2.05e-06	9.41e-09	1.77457	SAMD9
225496_s_at	0.000261	1.02e-05	1.77424	SYTL2
205343_at	0.0035	0.000698	1.77269	SULT1C2
204463_s_at	0.00124	0.000137	1.77197	EDNRA
201188_s_at	3.81e-06	2.26e-08	1.76738	ITPR3
232914_s_at	0.000323	1.41e-05	1.7671	SYTL2
204856_at	3.34e-06	1.91e-08	1.76518	B3GNT3
219856_at	1.61e-05	1.8e-07	1.76516	C1orf116
222449_at	2.37e-05	3.15e-07	1.76141	PMEPA1
203325_s_at	0.00198	0.000295	1.76133	COL5A1
204464_s_at	0.00082	6.5e-05	1.75858	EDNRA
1555269_a_at	0.000159	4.88e-06	1.75743	ANO1
201860_s_at	0.00405	0.000864	1.75738	PLAT
201251_at	4.09e-06	2.52e-08	1.75686	PKM
1554997_a_at	0.000958	8.55e-05	1.75186	PTGS2
222108_at	6.79e-06	5.18e-08	1.74843	AMIGO2
203936_s_at	0.000539	3.22e-05	1.74593	MMP9
214421_x_at	0.00284	0.000516	1.74496	CYP2C9
228729_at	7.48e-06	5.92e-08	1.74324	CCNB1
224694_at	0.00099	9.12e-05	1.74066	ANTXR1
204033_at	8.95e-06	7.72e-08	1.74025	TRIP13
233555_s_at	0.00107	0.000105	1.73955	SULF2
242662_at	4.72e-05	8.63e-07	1.73757	PCSK6
202095_s_at	1.83e-05	2.17e-07	1.73688	BIRC5
219032_x_at	6.12e-05	1.22e-06	1.73465	OPN3
218810_at	3.77e-05	6.13e-07	1.73438	MIR6732
225314_at	6.96e-07	1.66e-09	1.73349	OCIAD2
205180_s_at	8.85e-07	2.64e-09	1.73193	ADAM8
227372_s_at	3.07e-05	4.57e-07	1.73166	BAIAP2L1
225536_at	5.61e-05	1.1e-06	1.731	TMEM54
217763_s_at	0.00212	0.000329	1.73042	RAB31
238063_at	1.83e-05	2.17e-07	1.7292	TMEM154
202503_s_at	6.73e-06	5.1e-08	1.72837	KIAA0101
1559361_at	5.67e-07	1.15e-09	1.7273	LOC101927668
1554897_s_at	5.67e-06	4.06e-08	1.72521	RHBDL2
216971_s_at	0.000172	5.5e-06	1.7246	PLEC
204285_s_at	4.43e-05	7.8e-07	1.72458	PMAIP1
221900_at	0.000515	2.97e-05	1.72387	COL8A2
207222_at	0.000845	6.88e-05	1.72323	LOC100652777
204962_s_at	1.95e-05	2.37e-07	1.72287	SLC35F6
202827_s_at	0.000176	5.67e-06	1.72059	MMP14
203755_at	2.56e-06	1.28e-08	1.71993	BUB1B
226275_at	1.1e-05	1.06e-07	1.7194	MXD1
209714_s_at	0.000224	8.09e-06	1.71845	CDKN3
201792_at	0.00199	0.000298	1.71542	AEBP1
206326_at	0.000349	1.59e-05	1.71448	GRP
201309_x_at	0.000285	1.17e-05	1.71249	NREP
204073_s_at	1.06e-06	3.54e-09	1.70857	MYRF
202023_at	3.36e-05	5.25e-07	1.70843	EFNA1
218585_s_at	6.86e-05	1.45e-06	1.70794	DTL
227660_at	7.91e-05	1.8e-06	1.70612	ANTXR1
207414_s_at	8.72e-06	7.31e-08	1.70591	LOC100507472
206025_s_at	0.000665	4.52e-05	1.70508	TNFAIP6
205700_at	0.000344	1.55e-05	1.70354	HSD17B6
204341_at	2.03e-06	9.2e-09	1.70011	TRIM16
236313_at	0.00234	0.000384	1.69964	CDKN2B
202581_at	0.000839	6.76e-05	1.69811	HSPA1B
215108_x_at	4.85e-05	9.06e-07	1.69796	TOX3
225387_at	4e-05	6.71e-07	1.6977	TSPAN5
203362_s_at	6.56e-06	4.94e-08	1.69699	MAD2L1
220133_at	0.00792	0.00222	1.69659	ODAM
201313_at	9.21e-05	2.23e-06	1.69467	ENO2
1555383_a_at	7.9e-05	1.79e-06	1.69436	POF1B
219956_at	5.75e-05	1.13e-06	1.69387	GALNT6
227196_at	0.000296	1.24e-05	1.6932	RHPN2
210398_x_at	0.000122	3.32e-06	1.69206	FUT6
220918_at	0.000139	4.1e-06	1.6919	RUNX1-IT1
205568_at	0.000401	1.97e-05	1.69087	AQP9
220196_at	0.00466	0.00106	1.6905	MUC16
205071_x_at	2.5e-05	3.4e-07	1.69038	XRCC4
238956_at	0.00366	0.000747	1.69008	EFNA2
223540_at	3.81e-06	2.27e-08	1.68789	NECTIN4
201621_at	0.000202	6.9e-06	1.68545	NBL1
201201_at	4.82e-07	9.52e-10	1.68389	CSTB
214234_s_at	0.0016	0.000208	1.68265	CYP3A5
215729_s_at	0.00203	0.000306	1.68234	VGLL1
207165_at	1.56e-05	1.73e-07	1.68152	HMMR
208358_s_at	0.000166	5.22e-06	1.68083	UGT8
235568_at	0.000865	7.15e-05	1.67822	MCEMP1
227614_at	0.000341	1.53e-05	1.67608	HKDC1
212021_s_at	1.08e-05	1.02e-07	1.67365	MKI67
207714_s_at	0.000458	2.45e-05	1.67193	SERPINH1
205185_at	0.00652	0.00171	1.6714	SPINK5
219901_at	4.81e-09	6.14e-13	1.66921	FGD6
210797_s_at	1.47e-05	1.6e-07	1.66716	OASL
228933_at	3.48e-05	5.54e-07	1.66577	NHS
204279_at	0.00161	0.000211	1.6649	PSMB9
228865_at	8.14e-05	1.88e-06	1.66474	C1orf116
222020_s_at	0.000267	1.06e-05	1.66441	LOC102725271
208300_at	4.65e-05	8.39e-07	1.66383	PTPRH
211958_at	0.00334	0.000653	1.66142	IGFBP5
202510_s_at	0.00074	5.52e-05	1.6611	TNFAIP2
202580_x_at	0.000303	1.28e-05	1.66026	FOXM1
209008_x_at	2.99e-05	4.43e-07	1.66015	KRT8
1569150_x_at	0.000101	2.54e-06	1.65971	PDLIM7
227801_at	4.05e-08	3.19e-11	1.65893	TRIM59
213418_at	0.00458	0.00103	1.65726	HSPA6
205499_at	0.000936	8.2e-05	1.65446	SRPX2
33304_at	0.000263	1.03e-05	1.65348	ISG20
216010_x_at	0.000152	4.58e-06	1.65241	FUT3
204933_s_at	0.00532	0.00129	1.65203	TNFRSF11B
203789_s_at	0.00211	0.000325	1.65036	SEMA3C
202779_s_at	5.68e-06	4.07e-08	1.65001	UBE2S
209604_s_at	0.00119	0.000127	1.64929	GATA3
209417_s_at	0.000131	3.7e-06	1.64813	IFI35
213611_at	0.000101	2.53e-06	1.64796	AQP5
1566764_at	8.74e-06	7.38e-08	1.64762	MACC1
205421_at	0.000134	3.85e-06	1.64632	SLC22A3
217875_s_at	0.000183	6.04e-06	1.64624	PMEPA1
201506_at	0.00041	2.04e-05	1.646	TGFBI
201431_s_at	0.00174	0.00024	1.64534	DPYSL3
201641_at	0.000813	6.41e-05	1.64306	BST2
204006_s_at	0.00689	0.00184	1.64251	FCGR3B
37512_at	0.000198	6.7e-06	1.6425	HSD17B6
204286_s_at	2.54e-05	3.48e-07	1.64197	PMAIP1
204026_s_at	1.61e-05	1.8e-07	1.64195	ZWINT
235521_at	0.000347	1.56e-05	1.64019	HOXA3
1563209_a_at	0.00461	0.00104	1.63879	MACROD2
217771_at	9.06e-06	7.83e-08	1.63875	GOLM1
202954_at	5.01e-06	3.35e-08	1.63851	UBE2C
205844_at	0.0141	0.00477	1.63842	VNN1
208323_s_at	0.00961	0.00288	1.63811	ANXA13
200737_at	1.56e-06	6.2e-09	1.63776	PGK1
202712_s_at	0.00045	2.38e-05	1.63724	CKMT1A
213905_x_at	0.00201	0.000302	1.63663	BGN
211889_x_at	2.67e-06	1.38e-08	1.63578	CEACAM1
221755_at	0.000262	1.03e-05	1.6351	EHBP1L1
1558378_a_at	0.00022	7.87e-06	1.6347	AHNAK2
226930_at	0.00825	0.00235	1.63307	FNDC1
209201_x_at	0.00716	0.00193	1.63285	CXCR4
221696_s_at	4.62e-06	3.01e-08	1.62943	STYK1
222899_at	3.6e-05	5.74e-07	1.62929	ITGA11
232361_s_at	8.95e-06	7.7e-08	1.62899	EHF
206284_x_at	2.88e-05	4.18e-07	1.62844	CLTB
233109_at	0.000378	1.8e-05	1.62683	COL12A1
209872_s_at	0.000113	2.96e-06	1.62679	PKP3
224724_at	0.000689	4.83e-05	1.62462	SULF2
219747_at	0.000202	6.97e-06	1.62457	NDNF
230252_at	0.000264	1.04e-05	1.62393	LPAR5
229070_at	0.00577	0.00144	1.62284	ADTRP
219655_at	0.000184	6.08e-06	1.62121	SUGCT
214453_s_at	0.00098	8.91e-05	1.62069	IFI44
209969_s_at	2e-05	2.48e-07	1.62005	STAT1
210538_s_at	0.000354	1.62e-05	1.616	BIRC3
1555758_a_at	0.000426	2.17e-05	1.61552	CDKN3
1555136_at	1.23e-07	1.22e-10	1.61494	FGD6
205227_at	1.4e-05	1.48e-07	1.61332	IL1RAP
214068_at	4.67e-05	8.47e-07	1.61313	BEAN1
226757_at	0.000272	1.09e-05	1.61231	IFIT2
226799_at	2.87e-07	4.99e-10	1.61014	FGD6
213562_s_at	0.000211	7.4e-06	1.60884	SQLE
204304_s_at	0.00584	0.00147	1.60803	PROM1
219916_s_at	2.85e-05	4.09e-07	1.60405	RNF39
208622_s_at	2.01e-06	9.02e-09	1.60391	EZR
206595_at	0.00705	0.00189	1.60299	CST6
231240_at	0.00238	0.000393	1.60199	DIO2
205266_at	0.000282	1.15e-05	1.60095	LIF
208268_at	0.000335	1.48e-05	1.5978	ADAM28
219756_s_at	2.18e-05	2.82e-07	1.59768	POF1B
227676_at	0.0108	0.00335	1.59697	FAM3D
213094_at	0.00023	8.4e-06	1.59613	ADGRG6
241898_at	4.8e-05	8.93e-07	1.59576	LIPH
224916_at	0.000249	9.49e-06	1.59549	TMEM173
206074_s_at	5.99e-05	1.18e-06	1.59535	HMGA1
211599_x_at	7.29e-06	5.71e-08	1.59459	MET
201015_s_at	1.8e-05	2.11e-07	1.59381	JUP
223232_s_at	0.000695	4.9e-05	1.59284	CGN
201005_at	2.44e-06	1.19e-08	1.59226	CD9
226869_at	0.000409	2.03e-05	1.59214	MEGF6
204070_at	0.001	9.35e-05	1.59032	RARRES3
219909_at	0.000762	5.77e-05	1.58998	MMP28
218002_s_at	0.0207	0.00781	1.58916	CXCL14
222830_at	0.000408	2.02e-05	1.5885	GRHL1
210423_s_at	0.000617	4.01e-05	1.58138	SLC11A1
231029_at	0.000666	4.53e-05	1.58073	F5
202207_at	0.000439	2.28e-05	1.58008	ARL4C
237159_x_at	2.67e-07	4.1e-10	1.57897	AP1S3
214580_x_at	0.00934	0.00277	1.57783	KRT6C
208502_s_at	1.08e-05	1.02e-07	1.57701	PITX1
211184_s_at	9.55e-06	8.5e-08	1.57643	USH1C
208949_s_at	1.46e-05	1.57e-07	1.57568	LGALS3
202575_at	0.00131	0.000151	1.57335	CRABP2
209949_at	0.00234	0.000382	1.57334	NCF2
233177_s_at	5.72e-06	4.12e-08	1.57273	PNKD
219990_at	9.8e-06	8.85e-08	1.57223	E2F8
1557197_a_at	6.63e-05	1.38e-06	1.56978	LGALS3
1554452_a_at	0.000796	6.21e-05	1.56975	HILPDA
36742_at	5e-05	9.45e-07	1.56944	TRIM15
211919_s_at	0.00871	0.00252	1.56876	CXCR4
1566465_at	4.42e-05	7.77e-07	1.56852	KCNK1
217764_s_at	0.00273	0.000484	1.56816	RAB31
236979_at	0.00087	7.22e-05	1.56768	BCL2L15
203699_s_at	0.00148	0.000183	1.56765	DIO2
201852_x_at	0.00259	0.000448	1.56725	COL3A1
208436_s_at	0.000407	2.01e-05	1.56612	IRF7
225320_at	1.64e-06	6.89e-09	1.56581	MCU
1554768_a_at	0.00013	3.6e-06	1.56445	MAD2L1
204174_at	0.00332	0.000648	1.56426	ALOX5AP
1558199_at	0.000551	3.34e-05	1.56355	FN1
200906_s_at	0.0025	0.000423	1.56279	PALLD
212792_at	1.03e-05	9.54e-08	1.56226	DPY19L1
235911_at	0.00019	6.36e-06	1.56039	MELTF
218507_at	0.00103	9.84e-05	1.56025	HILPDA
210233_at	0.000161	4.96e-06	1.5583	IL1RAP
209408_at	2.88e-05	4.19e-07	1.55796	KIF2C
201189_s_at	1.68e-05	1.92e-07	1.55683	ITPR3
211882_x_at	0.000176	5.69e-06	1.55561	FUT6
228407_at	0.000201	6.88e-06	1.55502	SCUBE3
219215_s_at	0.000115	3.04e-06	1.55501	SLC39A4
209873_s_at	1.35e-05	1.4e-07	1.55441	PKP3
223233_s_at	0.00021	7.33e-06	1.55295	CGN
232530_at	3.37e-05	5.29e-07	1.55236	PLD1
229459_at	8.13e-05	1.88e-06	1.55221	FAM19A5
214059_at	0.000644	4.29e-05	1.55191	IFI44
41660_at	7.48e-06	5.91e-08	1.55163	CELSR1
208659_at	5e-07	9.98e-10	1.55013	CLIC1
217518_at	1.8e-05	2.1e-07	1.54935	MYOF
1563792_at	0.00204	0.00031	1.54876	AMN
225275_at	0.0011	0.000111	1.54767	EDIL3
217762_s_at	0.00188	0.00027	1.54765	RAB31
202679_at	7.47e-05	1.64e-06	1.54741	NPC1
218986_s_at	3.2e-05	4.83e-07	1.54696	DDX60
203453_at	0.00159	0.000206	1.54643	SCNN1A
206515_at	0.000692	4.87e-05	1.54568	CYP4F3
226129_at	2.03e-05	2.52e-07	1.54551	FAM83H
231835_at	9.71e-06	8.67e-08	1.54508	FAM213B
205068_s_at	2.75e-06	1.45e-08	1.54415	ARHGAP26
226884_at	0.000499	2.83e-05	1.54385	LRRN1
206133_at	0.000116	3.07e-06	1.543	XAF1
235821_at	0.000983	8.97e-05	1.54259	WISP1
229764_at	0.000752	5.63e-05	1.54199	TPRG1
218355_at	2.62e-06	1.33e-08	1.54149	KIF4A
209040_s_at	0.000462	2.49e-05	1.54142	PSMB8
220048_at	0.000124	3.38e-06	1.54118	EDAR
202206_at	0.000386	1.86e-05	1.54069	ARL4C
206026_s_at	0.00106	0.000103	1.54056	TNFAIP6
226107_at	4.76e-06	3.15e-08	1.54046	C1GALT1
209360_s_at	0.00108	0.000107	1.53668	LOC101928269
227449_at	0.00161	0.000212	1.53632	EPHA4
222662_at	8.72e-06	7.3e-08	1.53527	PPP1R3B
202208_s_at	0.000149	4.48e-06	1.53521	ARL4C
202748_at	0.00016	4.93e-06	1.53395	GBP2
219161_s_at	5.46e-06	3.84e-08	1.53383	CKLF-CMTM1
238996_x_at	8.57e-06	7.09e-08	1.53303	ALDOA
212647_at	8.21e-05	1.91e-06	1.533	RRAS
208063_s_at	0.00087	7.24e-05	1.5322	CAPN9
215071_s_at	0.00018	5.87e-06	1.53159	HIST1H2AC
233487_s_at	4.15e-05	7.07e-07	1.53118	LRRC8A
215446_s_at	0.00425	0.00093	1.53045	LOX
218693_at	3.37e-05	5.29e-07	1.5303	TSPAN15
201666_at	0.00157	0.000201	1.52902	TIMP1
205807_s_at	1.61e-05	1.81e-07	1.52791	TUFT1
204254_s_at	0.000508	2.9e-05	1.52719	VDR
227949_at	0.00406	0.000869	1.52687	PHACTR3
217867_x_at	7.55e-07	2.09e-09	1.52682	BACE2
209457_at	0.000464	2.51e-05	1.52613	DUSP5
201310_s_at	0.000489	2.74e-05	1.52587	NREP
91703_at	0.000181	5.93e-06	1.52568	EHBP1L1
205566_at	2.88e-05	4.16e-07	1.52507	ABHD2
203397_s_at	1.22e-05	1.21e-07	1.52447	GALNT3
203153_at	0.00293	0.000539	1.52409	IFIT1
206600_s_at	0.000388	1.87e-05	1.5238	SLC16A5
200665_s_at	0.00188	0.000271	1.52138	SPARC
204083_s_at	0.00364	0.000742	1.51922	TPM2
200666_s_at	0.000125	3.41e-06	1.51887	DNAJB1
1552797_s_at	0.00792	0.00222	1.51872	PROM2
235463_s_at	1.4e-05	1.48e-07	1.51503	CERS6
202391_at	0.00207	0.000316	1.51364	BASP1
200916_at	1.69e-06	7.13e-09	1.51343	TAGLN2
201954_at	0.000474	2.59e-05	1.51265	ARPC1B
227626_at	0.00045	2.38e-05	1.51261	PAQR8
204747_at	0.000556	3.39e-05	1.51196	IFIT3
207426_s_at	0.000137	3.94e-06	1.51023	TNFSF4
210641_at	0.00054	3.23e-05	1.50989	CAPN9
226907_at	0.000821	6.54e-05	1.50963	PPP1R14C
201170_s_at	3.34e-06	1.92e-08	1.50943	BHLHE40
212022_s_at	6.66e-06	5.03e-08	1.50886	MKI67
218309_at	0.000338	1.5e-05	1.50801	CAMK2N1
204162_at	6.45e-05	1.33e-06	1.50759	NDC80
1554195_a_at	0.00144	0.000175	1.50707	C5orf46
201416_at	1.82e-06	7.89e-09	1.5062	SOX4
203700_s_at	0.00109	0.00011	1.50429	DIO2
210933_s_at	4.8e-05	8.94e-07	1.50388	FSCN1
214070_s_at	0.00501	0.00118	1.50223	ATP10B
228956_at	0.000394	1.91e-05	1.50185	UGT8
213503_x_at	4.06e-06	2.48e-08	1.50049	ANXA2
91816_f_at	7.68e-05	1.7e-06	1.50033	MEX3D
234994_at	0.00127	0.000141	1.50028	TMEM200A
222392_x_at	1.51e-07	1.75e-10	1.49954	PERP
205627_at	0.000184	6.09e-06	1.49901	CDA
221173_at	2.16e-05	2.77e-07	1.49793	USH1C
222077_s_at	2.12e-05	2.72e-07	1.49718	RACGAP1
228273_at	6.16e-05	1.24e-06	1.49387	PRR11
206307_s_at	0.00012	3.22e-06	1.49325	FOXD1
210978_s_at	8.18e-07	2.35e-09	1.49252	TAGLN2
1555420_a_at	6.83e-05	1.44e-06	1.49165	KLF7
213007_at	5.75e-06	4.17e-08	1.49148	FANCI
231832_at	0.000123	3.37e-06	1.49108	POC1B-GALNT4
220356_at	0.000981	8.94e-05	1.49096	CORIN
225524_at	0.000531	3.15e-05	1.49092	ANTXR2
211959_at	0.00266	0.000465	1.49039	IGFBP5
222859_s_at	0.000224	8.09e-06	1.48865	DAPP1
204857_at	2.88e-05	4.2e-07	1.48839	MAD1L1
204146_at	0.000187	6.19e-06	1.48789	RAD51AP1
204416_x_at	0.0149	0.0051	1.48638	APOC1
230748_at	0.00112	0.000114	1.48348	SLC16A6
223878_at	0.000244	9.16e-06	1.4832	INPP4B
227174_at	0.0442	0.0204	1.48143	WDR72
1554020_at	7.62e-05	1.68e-06	1.48014	BICD1
208190_s_at	0.000867	7.19e-05	1.48006	LSR
204404_at	0.000392	1.9e-05	1.48	SLC12A2
1561254_at	0.000185	6.12e-06	1.47975	LOC340340
202403_s_at	0.0012	0.000128	1.47779	COL1A2
209921_at	0.000836	6.73e-05	1.47616	SLC7A11
217356_s_at	1.22e-05	1.23e-07	1.47556	PGK1
217678_at	0.00153	0.000194	1.47556	SLC7A11
204932_at	0.00329	0.00064	1.47512	TNFRSF11B
214701_s_at	0.00298	0.000553	1.47483	FN1
227647_at	0.00152	0.000192	1.47465	KCNE3
210117_at	2.32e-05	3.06e-07	1.47463	SPAG1
202705_at	3.25e-05	4.92e-07	1.47259	CCNB2
227249_at	6.95e-05	1.48e-06	1.47248	NDE1
37005_at	0.000357	1.64e-05	1.47115	MINOS1-NBL1
31845_at	3.64e-05	5.87e-07	1.46972	ELF4
208527_x_at	0.000231	8.43e-06	1.46885	HIST1H2BE
204778_x_at	1.02e-05	9.39e-08	1.46862	HOXB7
1553994_at	0.000563	3.45e-05	1.46847	NT5E
204822_at	0.000303	1.28e-05	1.46649	TTK
203780_at	2.35e-05	3.1e-07	1.46543	MPZL2
1569149_at	0.000481	2.66e-05	1.46541	PDLIM7
219513_s_at	1.51e-05	1.65e-07	1.46466	SH2D3A
205990_s_at	0.000956	8.51e-05	1.46338	WNT5A
219463_at	0.0254	0.0102	1.46286	LAMP5
228575_at	0.00219	0.000345	1.46245	IL20RB
206354_at	0.0186	0.00683	1.46244	SLCO1B3
234942_s_at	6.76e-07	1.57e-09	1.46115	DNTTIP1
219403_s_at	0.000386	1.86e-05	1.46088	HPSE
204298_s_at	0.00646	0.00169	1.45968	LOX
216243_s_at	7.83e-05	1.76e-06	1.45941	IL1RN
231779_at	3.82e-05	6.27e-07	1.45935	IRAK2
221011_s_at	0.000566	3.49e-05	1.45834	LBH
224583_at	0.000664	4.5e-05	1.45786	COTL1
209900_s_at	0.000757	5.72e-05	1.45749	SLC16A1
217028_at	0.00503	0.00119	1.45681	CXCR4
228010_at	0.0027	0.000477	1.45673	PPP2R2C
202269_x_at	0.00117	0.000124	1.45659	GBP1
201663_s_at	2.57e-05	3.53e-07	1.45652	SMC4
219493_at	1.22e-05	1.23e-07	1.45611	SHCBP1
235278_at	0.00555	0.00137	1.45509	MACROD2
232202_at	8.69e-05	2.05e-06	1.45478	FAM83B
213125_at	0.0119	0.00384	1.45453	OLFML2B
228708_at	0.000579	3.61e-05	1.45349	RAB27B
217744_s_at	2.67e-06	1.38e-08	1.45007	PERP
203418_at	2.45e-05	3.3e-07	1.44996	CCNA2
211744_s_at	9.21e-06	8.04e-08	1.44808	CD58
213425_at	0.000547	3.3e-05	1.44626	WNT5A
205535_s_at	0.000291	1.21e-05	1.44548	PCDH7
201897_s_at	1.88e-06	8.36e-09	1.44492	CKS1B
228910_at	4.79e-06	3.17e-08	1.44463	CD82
210159_s_at	0.000921	7.97e-05	1.44434	TRIM31
206414_s_at	1.25e-06	4.39e-09	1.44372	ASAP2
205234_at	0.000968	8.7e-05	1.44324	SLC16A4
214455_at	0.00208	0.000319	1.44192	HIST1H2BC
222067_x_at	0.000216	7.63e-06	1.44175	HIST1H2BD
216641_s_at	2.18e-05	2.83e-07	1.44156	LAD1
232458_at	0.0159	0.00557	1.44108	COL3A1
209325_s_at	0.000584	3.68e-05	1.44077	RGS16
219179_at	0.00619	0.00159	1.44023	DACT1
213807_x_at	2.56e-05	3.51e-07	1.43982	MET
206295_at	0.000109	2.83e-06	1.43901	IL18
209146_at	7.18e-05	1.55e-06	1.43879	MSMO1
227143_s_at	0.000174	5.58e-06	1.43871	BID
216836_s_at	0.000109	2.81e-06	1.43839	ERBB2
229553_at	0.000133	3.77e-06	1.43538	PGM2L1
201562_s_at	1.44e-05	1.54e-07	1.43453	SORD
203148_s_at	0.000496	2.81e-05	1.43301	TRIM14
217118_s_at	0.000856	7.04e-05	1.43288	KIAA0930
201596_x_at	9.63e-05	2.36e-06	1.43231	KRT18
208546_x_at	0.000133	3.78e-06	1.43212	HIST1H2BH
216251_s_at	1.14e-05	1.1e-07	1.43206	TTLL12
230100_x_at	2.94e-05	4.31e-07	1.43196	PAK1
201695_s_at	0.00021	7.36e-06	1.43166	PNP
218717_s_at	0.00338	0.000665	1.42758	P3H2
200664_s_at	0.000581	3.63e-05	1.42698	DNAJB1
205173_x_at	1.7e-05	1.96e-07	1.42676	CD58
201564_s_at	0.000443	2.31e-05	1.42653	FSCN1
223451_s_at	9.55e-06	8.49e-08	1.42546	CKLF
228948_at	0.00137	0.000161	1.42513	EPHA4
205349_at	4.42e-05	7.76e-07	1.42464	GNA15
207109_at	0.00085	6.95e-05	1.42454	POU2F3
204971_at	0.0027	0.000475	1.42338	CSTA
229450_at	0.00197	0.000292	1.42307	IFIT3
210413_x_at	0.00611	0.00156	1.42109	SERPINB4
238460_at	0.00253	0.000432	1.42021	FAM83A
201012_at	0.000783	6.04e-05	1.42007	ANXA1
212242_at	1.05e-06	3.45e-09	1.4196	TUBA4A
221978_at	0.000317	1.38e-05	1.41759	HLA-F
202068_s_at	0.000677	4.67e-05	1.41731	LDLR
206467_x_at	0.000944	8.32e-05	1.41695	RTEL1-TNFRSF6B
210367_s_at	0.000134	3.82e-06	1.41471	PTGES
205107_s_at	3.5e-06	2.04e-08	1.41419	EFNA4
202833_s_at	0.00435	0.000958	1.41391	SERPINA1
203767_s_at	0.000133	3.78e-06	1.41347	STS
208613_s_at	4.48e-05	7.96e-07	1.41311	FLNB
200862_at	8.8e-05	2.09e-06	1.41257	DHCR24
207691_x_at	0.00231	0.000375	1.41199	ENTPD1
205730_s_at	0.000134	3.82e-06	1.4092	ABLIM3
204362_at	0.000166	5.22e-06	1.40863	SKAP2
230398_at	0.000333	1.47e-05	1.40812	TNS4
229256_at	0.00015	4.53e-06	1.40758	PGM2L1
206558_at	0.00127	0.000141	1.4072	SIM2
222858_s_at	0.000481	2.65e-05	1.40537	DAPP1
204589_at	0.000716	5.19e-05	1.40536	NUAK1
201563_at	6.56e-06	4.94e-08	1.40497	SORD
1557352_at	0.00103	9.88e-05	1.40463	SQLE
210643_at	0.00166	0.000221	1.40443	TNFSF11
235046_at	0.00107	0.000106	1.40331	INPP4B
236193_at	0.000765	5.8e-05	1.40258	HIST1H2BC
225799_at	0.000356	1.63e-05	1.40119	LOC101930489
201430_s_at	0.00472	0.00108	1.39996	DPYSL3
205422_s_at	0.025	0.00995	1.39985	ITGBL1
202450_s_at	0.00783	0.00218	1.39867	CTSK
231270_at	0.000125	3.44e-06	1.39795	LOC100507258
220192_x_at	9.74e-06	8.73e-08	1.3974	SPDEF
230518_at	3.34e-05	5.19e-07	1.39708	MPZL2
239586_at	0.000483	2.67e-05	1.39653	FAM83A
217901_at	0.000139	4.06e-06	1.39608	DSG2
201590_x_at	2.67e-06	1.38e-08	1.39542	ANXA2
224733_at	0.00103	9.78e-05	1.39522	CMTM3
227850_x_at	0.00225	0.00036	1.39511	CDC42EP5
203382_s_at	0.0144	0.00491	1.3945	APOE
241762_at	0.00414	0.000894	1.3939	FBXO32
219332_at	2.08e-05	2.63e-07	1.39263	MICALL2
210427_x_at	3.33e-06	1.89e-08	1.39253	ANXA2
200907_s_at	0.00411	0.000883	1.39239	PALLD
205542_at	0.00136	0.000159	1.39211	STEAP1
227320_at	0.00038	1.82e-05	1.39162	ZNF664-FAM101A
202096_s_at	1.43e-05	1.53e-07	1.39036	TSPO
221058_s_at	3.34e-05	5.19e-07	1.39006	CKLF
208727_s_at	0.0018	0.000253	1.38787	CDC42
225061_at	2.26e-05	2.96e-07	1.38778	DNAJA4
204385_at	0.000157	4.79e-06	1.38766	KYNU
212573_at	0.000153	4.65e-06	1.38738	ENDOD1
224825_at	8.41e-07	2.45e-09	1.38682	DNTTIP1
225295_at	0.000218	7.79e-06	1.38614	SLC39A10
238028_at	0.000295	1.23e-05	1.38599	C6orf132
230424_at	0.00028	1.13e-05	1.38448	NREP
205980_s_at	2.97e-05	4.37e-07	1.38408	PRR5-ARHGAP8
222760_at	0.000503	2.87e-05	1.38382	ZNF703
218847_at	3.46e-05	5.48e-07	1.3838	IGF2BP2
225803_at	0.00245	0.000411	1.38356	FBXO32
227068_at	3.23e-06	1.82e-08	1.38318	PGK1
209545_s_at	3.83e-05	6.29e-07	1.38301	RIPK2
202478_at	0.000446	2.34e-05	1.38271	TRIB2
201105_at	0.00316	0.000602	1.38239	LGALS1
204588_s_at	0.00279	0.000501	1.38236	SLC7A7
205073_at	0.00101	9.53e-05	1.38195	CYP2J2
205016_at	6.37e-07	1.42e-09	1.38181	TGFA
223541_at	0.0027	0.000477	1.3805	HAS3
1557257_at	0.00294	0.000542	1.37984	BCL10
228323_at	0.000102	2.56e-06	1.37935	KNL1
232213_at	5.18e-05	9.95e-07	1.37837	PELI1
209615_s_at	1.05e-05	9.82e-08	1.37729	PAK1
229545_at	4.34e-06	2.74e-08	1.37728	FERMT1
234608_at	0.00283	0.000513	1.3756	LAMA3
223000_s_at	7.42e-07	2.01e-09	1.3752	F11R
202237_at	0.0114	0.00361	1.37359	LOC101928916
201058_s_at	0.0155	0.00539	1.37316	MYL9
213226_at	4.67e-05	8.46e-07	1.37266	CCNA2
231822_at	2.81e-05	4.01e-07	1.37217	CTTNBP2NL
205014_at	0.00606	0.00154	1.37195	FGFBP1
201579_at	1.83e-06	8.01e-09	1.37171	FAT1
218451_at	3.33e-06	1.89e-08	1.37059	CDCP1
204137_at	0.000616	4e-05	1.37	GPR137B
202637_s_at	0.00204	0.00031	1.36889	ICAM1
207543_s_at	1.64e-05	1.86e-07	1.36737	P4HA1
221305_s_at	0.00241	0.0004	1.36675	UGT1A3
224609_at	1.88e-06	8.34e-09	1.36626	SLC44A2
214366_s_at	0.00178	0.000249	1.36607	ALOX5
203424_s_at	0.00131	0.000151	1.36275	IGFBP5
210387_at	0.0022	0.000347	1.36167	HIST1H2BJ
1558549_s_at	0.0193	0.00715	1.36122	VNN1
202071_at	3.75e-06	2.19e-08	1.36101	SDC4
214235_at	0.00376	0.000776	1.36089	CYP3A5
214866_at	4.53e-06	2.92e-08	1.36039	PLAUR
204818_at	0.0344	0.0149	1.36009	HSD17B2
226213_at	0.000243	9.06e-06	1.35918	ERBB3
211885_x_at	0.00036	1.66e-05	1.35888	FUT6
219978_s_at	6.82e-05	1.44e-06	1.35871	NUSAP1
208816_x_at	1.62e-06	6.59e-09	1.35844	ANXA2P2
204891_s_at	0.00765	0.00212	1.35795	LCK
1555486_a_at	2.04e-05	2.56e-07	1.35794	PRR5L
211161_s_at	0.00416	0.0009	1.3573	COL3A1
212481_s_at	0.000184	6.09e-06	1.3558	TPM4
216235_s_at	0.00184	0.000262	1.35563	EDNRA
202674_s_at	7.34e-05	1.6e-06	1.35507	LMO7
226702_at	0.000726	5.33e-05	1.35493	CMPK2
235651_at	7.15e-05	1.54e-06	1.3549	TTC22
225847_at	2.04e-05	2.57e-07	1.35366	NCEH1
213590_at	0.000488	2.72e-05	1.35365	SLC16A5
228143_at	0.0207	0.00784	1.35313	CP
213664_at	0.0085	0.00244	1.35289	SLC1A1
229276_at	0.000548	3.31e-05	1.35219	IGSF9
200974_at	0.00402	0.000857	1.35216	ACTA2
205709_s_at	0.00055	3.33e-05	1.35151	CDS1
235182_at	0.00864	0.0025	1.35139	ISM1
1553613_s_at	0.000348	1.57e-05	1.35099	FOXC1
217996_at	4.65e-05	8.39e-07	1.35082	PHLDA1
204914_s_at	0.00169	0.000229	1.35081	SOX11
204255_s_at	0.00129	0.000145	1.34948	VDR
213857_s_at	5.15e-05	9.87e-07	1.3481	CD47
202499_s_at	0.00212	0.000329	1.34807	SLC2A3
229661_at	6.43e-05	1.32e-06	1.34731	SALL4
218900_at	1.04e-06	3.37e-09	1.34725	CNNM4
243276_at	0.000244	9.19e-06	1.34533	ALS2CL
202253_s_at	4.15e-05	7.07e-07	1.34501	DNM2
205579_at	4.53e-05	8.08e-07	1.34498	HRH1
226185_at	0.00088	7.39e-05	1.34487	CDS1
202803_s_at	0.00853	0.00245	1.344	ITGB2
203407_at	1.99e-05	2.47e-07	1.34355	PPL
209709_s_at	0.000164	5.09e-06	1.34115	HMMR
238327_at	0.00119	0.000127	1.3404	ODF3B
225842_at	1.95e-05	2.4e-07	1.33993	PHLDA1
223386_at	0.000138	4.01e-06	1.33838	FAM118B
214549_x_at	0.0143	0.00487	1.33699	SPRR1A
209035_at	0.000189	6.32e-06	1.33655	MDK
202234_s_at	0.000593	3.77e-05	1.33586	SLC16A1
1553043_a_at	0.00208	0.000319	1.33413	CD300LF
223434_at	0.00317	0.000605	1.33357	GBP3
214927_at	0.0323	0.0138	1.33345	ITGBL1
221666_s_at	0.000371	1.75e-05	1.33303	PYCARD
238593_at	0.000177	5.73e-06	1.33261	C11orf80
204347_at	4.42e-05	7.79e-07	1.3325	LOC100507855
202202_s_at	0.0059	0.00149	1.33237	LAMA4
219985_at	0.000204	7.07e-06	1.33198	HS3ST3A1
214435_x_at	2.61e-05	3.64e-07	1.33169	RALA
205166_at	0.000143	4.24e-06	1.3313	CAPN5
226013_at	8.21e-05	1.91e-06	1.33129	TRAK1
216942_s_at	3.84e-05	6.35e-07	1.33111	CD58
232977_x_at	0.000311	1.34e-05	1.33104	MYH14
228696_at	3.45e-05	5.45e-07	1.331	SLC45A3
208079_s_at	0.000983	8.96e-05	1.33086	AURKA
218755_at	0.000677	4.67e-05	1.33083	KIF20A
238741_at	0.00187	0.00027	1.33068	FAM83A
203585_at	3.01e-05	4.46e-07	1.33036	ZNF185
211075_s_at	0.000137	3.95e-06	1.33025	CD47
208103_s_at	7.55e-05	1.66e-06	1.32955	ANP32E
202307_s_at	0.00032	1.39e-05	1.32951	TAP1
210868_s_at	3.15e-05	4.72e-07	1.32951	ELOVL6
218802_at	0.00155	0.000198	1.32915	MCUB
206571_s_at	4.08e-06	2.5e-08	1.32885	MAP4K4
205525_at	0.00142	0.000171	1.32865	CALD1
202935_s_at	0.000163	5.04e-06	1.32853	SOX9
204420_at	0.000423	2.14e-05	1.32839	FOSL1
204007_at	0.00652	0.0017	1.32827	FCGR3B
236489_at	0.00335	0.000656	1.32808	ADGRF1
227379_at	5.16e-05	9.9e-07	1.32701	MBOAT1
219383_at	5.3e-05	1.02e-06	1.32697	PRR5L
1553997_a_at	0.000112	2.93e-06	1.32601	ASPHD1
202604_x_at	7.41e-06	5.83e-08	1.32484	ADAM10
226936_at	0.00128	0.000144	1.32382	CENPW
218051_s_at	0.00174	0.000239	1.32325	NT5DC2
220988_s_at	0.00283	0.000515	1.32277	C1QTNF3
222750_s_at	0.00115	0.00012	1.32162	SRD5A3
209758_s_at	0.0273	0.0112	1.32067	MFAP5
219371_s_at	0.0018	0.000254	1.32062	KLF2
226456_at	1.15e-05	1.12e-07	1.32028	RMI2
224209_s_at	0.00922	0.00272	1.32009	GDA
220615_s_at	0.00133	0.000155	1.31981	FAR2
239108_at	0.00146	0.00018	1.31734	FAR2
213603_s_at	0.00256	0.000439	1.31732	RAC2
234290_x_at	0.00054	3.23e-05	1.3153	MYH14
222675_s_at	0.000125	3.41e-06	1.31522	BAIAP2L1
223595_at	0.000296	1.25e-05	1.31497	TMEM133
1553105_s_at	0.000944	8.34e-05	1.31286	DSG2
238022_at	6.39e-05	1.31e-06	1.31248	CRNDE
228400_at	0.00067	4.58e-05	1.31086	SHROOM3
211043_s_at	0.000368	1.72e-05	1.30963	CLTB
201417_at	4.58e-06	2.97e-08	1.30887	SOX4
226980_at	0.000929	8.1e-05	1.30804	DEPDC1B
200625_s_at	3.78e-05	6.14e-07	1.3075	CAP1
206393_at	0.00113	0.000116	1.30728	TNNI2
217733_s_at	2.29e-05	3e-07	1.30519	TMSB10
227415_at	0.0002	6.81e-06	1.30506	DGKH
210915_x_at	0.0299	0.0125	1.30502	TRBC1
226707_at	0.000489	2.74e-05	1.30496	NAPRT
223307_at	0.00129	0.000147	1.30447	CDCA3
202363_at	0.00291	0.000535	1.3039	SPOCK1
206796_at	0.00226	0.000362	1.30371	WISP1
203313_s_at	4.24e-06	2.65e-08	1.30366	TGIF1
206082_at	0.000613	3.98e-05	1.3031	HCP5
214036_at	6.99e-06	5.38e-08	1.30283	EFNA5
206091_at	0.0125	0.00406	1.30253	MATN3
1557051_s_at	0.00265	0.000463	1.30101	HOTAIRM1
234725_s_at	0.000104	2.62e-06	1.3005	SEMA4B
202236_s_at	0.00206	0.000314	1.3	SLC16A1
203964_at	8.95e-06	7.67e-08	1.2996	NMI
201261_x_at	0.00483	0.00111	1.29801	BGN
202454_s_at	0.00117	0.000124	1.29743	ERBB3
201481_s_at	0.000138	4.03e-06	1.29733	PYGB
229377_at	0.000708	5.09e-05	1.29595	GRTP1
232304_at	0.000156	4.75e-06	1.29478	PELI1
212013_at	0.00271	0.000479	1.29472	PXDN
206110_at	0.00138	0.000163	1.29436	HIST1H3F
229635_at	0.00647	0.00169	1.29383	LINC01094
201649_at	0.000512	2.94e-05	1.29356	UBE2L6
226055_at	0.000718	5.21e-05	1.29244	ARRDC2
225548_at	0.000282	1.15e-05	1.29238	SHROOM3
212659_s_at	4.23e-05	7.29e-07	1.29187	IL1RN
200661_at	2.37e-05	3.17e-07	1.29163	CTSA
238462_at	0.000946	8.38e-05	1.29123	UBASH3B
211762_s_at	1.54e-05	1.7e-07	1.28694	KPNA2
227041_at	3.82e-06	2.29e-08	1.28688	SESTD1
205046_at	0.000274	1.1e-05	1.28669	CENPE
205206_at	0.00283	0.000513	1.28644	ANOS1
229842_at	0.00141	0.00017	1.28585	ELF3
210896_s_at	0.000515	2.97e-05	1.28382	ASPH
242907_at	0.000757	5.72e-05	1.28345	GBP2
203476_at	1.62e-05	1.83e-07	1.28316	TPBG
219959_at	0.00719	0.00194	1.28181	MOCOS
225618_at	5.1e-05	9.72e-07	1.28168	ARHGAP27
215812_s_at	0.00125	0.000139	1.28109	SLC6A10PB
206114_at	0.00157	0.000203	1.28087	EPHA4
224929_at	0.000726	5.34e-05	1.28028	TMEM173
205453_at	0.00292	0.000537	1.27971	HOXB2
230000_at	0.000655	4.42e-05	1.2797	RNF213
210264_at	6.29e-05	1.28e-06	1.27849	GPR35
201418_s_at	2.24e-05	2.92e-07	1.27843	SOX4
226372_at	0.00206	0.000315	1.27794	CHST11
215076_s_at	0.00261	0.000454	1.27762	COL3A1
202107_s_at	7.91e-05	1.8e-06	1.27752	MCM2
213453_x_at	2.13e-06	1e-08	1.27687	GAPDH
225655_at	0.000303	1.28e-05	1.2766	UHRF1
225186_at	1.15e-05	1.12e-07	1.2762	RAPH1
202910_s_at	8.79e-05	2.08e-06	1.27562	ADGRE5
201231_s_at	7.75e-05	1.73e-06	1.27518	ENO1
38037_at	0.00204	0.000309	1.27506	HBEGF
204858_s_at	0.000797	6.23e-05	1.27497	TYMP
1555705_a_at	0.00101	9.53e-05	1.27495	CMTM3
210664_s_at	0.000665	4.51e-05	1.27475	TFPI
200615_s_at	0.000109	2.83e-06	1.27465	AP2B1
207191_s_at	0.0132	0.00438	1.27436	ISLR
226552_at	0.000214	7.58e-06	1.27417	IER5L
210813_s_at	7.59e-05	1.67e-06	1.27387	XRCC4
211725_s_at	3.69e-05	5.95e-07	1.27366	BID
217173_s_at	0.00168	0.000226	1.27263	LDLR
208680_at	0.00013	3.62e-06	1.27241	PRDX1
219263_at	0.000182	5.97e-06	1.27192	RNF128
205366_s_at	0.000216	7.67e-06	1.27123	HOXB6
221911_at	0.00037	1.73e-05	1.27013	ETV1
227231_at	0.000977	8.86e-05	1.26922	KIAA1211
221879_at	0.00172	0.000236	1.26883	CALML4
224392_s_at	1.22e-05	1.23e-07	1.26863	OPN3
236641_at	0.000157	4.82e-06	1.26753	KIF14
209882_at	6.02e-05	1.2e-06	1.26698	RIT1
229242_at	0.000373	1.76e-05	1.26677	TNFSF15
202180_s_at	0.000109	2.82e-06	1.26669	MVP
213790_at	0.0201	0.00756	1.26604	ADAM12
222680_s_at	0.000231	8.45e-06	1.26576	DTL
230318_at	0.0326	0.014	1.26489	SERPINA1
213703_at	0.00305	0.000573	1.26466	LINC00342
217294_s_at	0.000983	8.98e-05	1.26416	ENO1
231577_s_at	0.00216	0.000338	1.26392	GBP1
203234_at	3.49e-05	5.57e-07	1.26384	UPP1
209160_at	0.00618	0.00158	1.26378	AKR1C3
209691_s_at	1e-05	9.14e-08	1.26309	DOK4
203939_at	0.00417	0.000904	1.26234	NT5E
200838_at	0.00102	9.7e-05	1.26226	CTSB
1552367_a_at	0.00181	0.000257	1.26226	SCIN
202079_s_at	5.73e-05	1.12e-06	1.26213	TRAK1
209621_s_at	0.00611	0.00156	1.2618	PDLIM3
226423_at	0.000935	8.19e-05	1.26004	PAQR8
213164_at	4.67e-06	3.06e-08	1.25975	SLC5A3
214898_x_at	0.000711	5.13e-05	1.25961	MUC3B
203502_at	1.05e-05	9.8e-08	1.25894	BPGM
200650_s_at	2.03e-05	2.53e-07	1.25857	LDHA
205640_at	6.43e-05	1.32e-06	1.25811	ALDH3B1
229296_at	0.0107	0.00332	1.25786	LINC01503
219360_s_at	1.38e-05	1.45e-07	1.25661	TRPM4
219211_at	0.00037	1.74e-05	1.25616	USP18
200641_s_at	1.87e-05	2.24e-07	1.25607	YWHAZ
239155_at	0.00115	0.000119	1.25544	CXADR
1552477_a_at	0.000487	2.72e-05	1.25481	IRF6
226582_at	0.000517	3e-05	1.25465	LOC400043
221059_s_at	0.00103	9.79e-05	1.25382	COTL1
1554168_a_at	0.000586	3.7e-05	1.25354	SH3KBP1
202052_s_at	2.98e-05	4.4e-07	1.25291	RAI14
228054_at	3.27e-05	4.99e-07	1.25289	TMEM44
206994_at	0.00268	0.000472	1.25269	CST4
203417_at	0.00249	0.000421	1.25258	MFAP2
216025_x_at	0.0172	0.00618	1.25201	CYP2C9
218260_at	2.42e-06	1.17e-08	1.25134	DDA1
222810_s_at	0.000184	6.1e-06	1.25128	RASAL2
219090_at	0.0016	0.000208	1.25125	SLC24A3
207158_at	0.0256	0.0103	1.25068	APOBEC1
206214_at	0.0123	0.00399	1.2498	PLA2G7
208555_x_at	0.00241	0.0004	1.24891	CST2
205137_x_at	8.08e-05	1.86e-06	1.24868	USH1C
209937_at	0.0169	0.00605	1.24799	TM4SF4
65517_at	0.000138	4e-06	1.24781	AP1M2
203035_s_at	0.000129	3.56e-06	1.24764	PIAS3
203370_s_at	0.00272	0.000482	1.24598	PDLIM7
229720_at	0.00107	0.000106	1.24515	BAG1
205394_at	0.000394	1.91e-05	1.24513	CHEK1
223038_s_at	5.75e-06	4.18e-08	1.2446	FAM60A
207223_s_at	0.00037	1.74e-05	1.24439	PTBP3
209344_at	0.00172	0.000235	1.24397	TPM4
210830_s_at	7.9e-05	1.79e-06	1.2426	PON2
208965_s_at	0.0072	0.00195	1.24088	IFI16
230831_at	0.000304	1.29e-05	1.24061	FRMD5
204927_at	9.35e-05	2.26e-06	1.24054	RASSF7
202902_s_at	0.00392	0.000825	1.24015	CTSS
208161_s_at	0.00123	0.000135	1.2397	ABCC3
223739_at	0.00893	0.00261	1.23968	PADI1
1554334_a_at	2.67e-05	3.74e-07	1.23965	DNAJA4
204034_at	0.000197	6.67e-06	1.23916	ETHE1
241812_at	5.96e-07	1.28e-09	1.23911	SPATS2L
34210_at	0.0298	0.0124	1.23677	CD52
217655_at	0.00472	0.00108	1.23531	LOC100127972
213599_at	0.000755	5.69e-05	1.23517	OIP5
242228_at	1.17e-05	1.14e-07	1.2349	BICD1
201283_s_at	4.73e-05	8.68e-07	1.23462	TRAK1
213943_at	0.00318	0.000607	1.23422	TWIST1
221241_s_at	0.00612	0.00156	1.23387	BCL2L14
202205_at	3.29e-05	5.06e-07	1.23316	VASP
230630_at	0.0001	2.48e-06	1.2331	LOC100507855
219229_at	0.000665	4.51e-05	1.23261	SLCO3A1
208702_x_at	4.11e-06	2.55e-08	1.23238	APLP2
201422_at	0.00155	0.000199	1.23179	IFI30
211756_at	0.00168	0.000227	1.23158	PTHLH
222088_s_at	0.00178	0.000248	1.23151	SLC2A14
210177_at	0.000796	6.21e-05	1.23078	TRIM15
222446_s_at	1.39e-05	1.47e-07	1.23069	BACE2
210220_at	0.00022	7.87e-06	1.23046	FZD2
207018_s_at	0.00058	3.63e-05	1.23045	RAB27B
221485_at	4.23e-05	7.27e-07	1.23038	B4GALT5
202820_at	0.00011	2.84e-06	1.23016	AHR
221875_x_at	0.000412	2.06e-05	1.22978	HLA-F
218788_s_at	0.000339	1.51e-05	1.22898	SMYD3
227309_at	8.71e-06	7.24e-08	1.22865	YOD1
223556_at	0.000145	4.3e-06	1.22858	HELLS
222484_s_at	0.048	0.0226	1.22682	CXCL14
205339_at	9.15e-07	2.78e-09	1.22678	STIL
203028_s_at	0.0012	0.000128	1.22634	CYBA
205991_s_at	0.0117	0.00371	1.22509	PRRX1
203779_s_at	7.03e-05	1.5e-06	1.22438	MPZL2
225639_at	0.000295	1.22e-05	1.2237	SKAP2
220622_at	0.01	0.00304	1.22334	LRRC31
203570_at	0.00385	0.000804	1.22329	LOXL1
203410_at	0.000893	7.58e-05	1.22304	AP3M2
202828_s_at	6.29e-05	1.28e-06	1.22245	MMP14
218567_x_at	6.76e-07	1.55e-09	1.22228	DPP3
200897_s_at	0.00436	0.000962	1.22106	PALLD
210399_x_at	0.000806	6.32e-05	1.21979	FUT6
1557749_at	0.000809	6.37e-05	1.21967	EHBP1L1
218499_at	1.67e-05	1.91e-07	1.21951	STK26
217140_s_at	2.46e-05	3.33e-07	1.21945	VDAC1
220092_s_at	0.000876	7.33e-05	1.21854	ANTXR1
236561_at	0.00108	0.000107	1.21838	TGFBR1
239579_at	4.78e-05	8.85e-07	1.21802	EPHX4
243582_at	0.00758	0.00209	1.21745	SH3RF2
218943_s_at	0.0012	0.000129	1.21735	DDX58
1552546_a_at	0.00458	0.00103	1.21678	LETM2
220312_at	0.00061	3.94e-05	1.21583	FAM83E
225868_at	0.00085	6.93e-05	1.21561	TRIM47
202952_s_at	0.022	0.00846	1.21557	ADAM12
200697_at	0.000707	5.07e-05	1.21497	HK1
204166_at	0.000465	2.52e-05	1.2144	SBNO2
225645_at	0.000291	1.2e-05	1.2142	EHF
203768_s_at	0.000112	2.92e-06	1.21332	STS
235245_at	0.000181	5.94e-06	1.21256	TMEM92
214687_x_at	2.72e-06	1.42e-08	1.21186	ALDOA
204361_s_at	6.18e-05	1.25e-06	1.21145	SKAP2
216905_s_at	1.99e-05	2.46e-07	1.21122	ST14
212012_at	0.00337	0.000662	1.20993	PXDN
226576_at	0.00047	2.57e-05	1.20991	ARHGAP26
216899_s_at	0.000363	1.69e-05	1.20933	SKAP2
205172_x_at	0.000123	3.34e-06	1.20927	CLTB
222549_at	0.00543	0.00133	1.20854	CLDN1
1552257_a_at	1.25e-05	1.26e-07	1.20824	TTLL12
239286_at	0.000802	6.28e-05	1.20808	CDH11
203085_s_at	0.00498	0.00117	1.20786	TGFB1
36936_at	3.1e-05	4.62e-07	1.20779	TSTA3
225189_s_at	4.42e-05	7.78e-07	1.2046	RAPH1
228152_s_at	4.72e-05	8.6e-07	1.20426	DDX60L
218849_s_at	0.000126	3.46e-06	1.20425	PPP1R13L
229899_s_at	4.17e-05	7.16e-07	1.20419	ZFAS1
200799_at	0.00107	0.000105	1.20417	HSPA1B
218182_s_at	0.00845	0.00242	1.20413	CLDN1
201830_s_at	1.77e-05	2.05e-07	1.20381	NET1
230047_at	0.000245	9.2e-06	1.2037	ARHGAP42
231033_at	0.00112	0.000116	1.20356	DSC2
226706_at	0.000206	7.17e-06	1.20355	FLJ23867
201124_at	0.000304	1.29e-05	1.20335	ITGB5
208156_x_at	0.00014	4.12e-06	1.20268	EPPK1
234992_x_at	0.000104	2.64e-06	1.20245	ECT2
224674_at	0.000232	8.5e-06	1.2005	TTYH3
235746_s_at	0.000237	8.79e-06	1.20003	PLA2R1
225777_at	4.29e-05	7.43e-07	1.19954	SAPCD2
202196_s_at	0.00296	0.000547	1.19944	DKK3
237411_at	2.58e-05	3.56e-07	1.19855	ADAMTS6
200677_at	1.36e-05	1.42e-07	1.19837	PTTG1IP
238673_at	1.47e-05	1.59e-07	1.1975	SAMD12
226187_at	0.00019	6.36e-06	1.19665	CDS1
209529_at	0.000349	1.58e-05	1.19566	PLPP2
223239_at	7.17e-05	1.54e-06	1.19556	GSKIP
206125_s_at	0.0125	0.00409	1.19537	KLK8
200839_s_at	0.000659	4.45e-05	1.1951	CTSB
202270_at	0.00183	0.00026	1.19383	GBP1
218638_s_at	0.00438	0.000968	1.19291	LOC100130872
1555905_a_at	0.000226	8.2e-06	1.1928	TCAIM
213667_at	2.58e-05	3.56e-07	1.19239	TMEM265
208490_x_at	0.000311	1.34e-05	1.19237	HIST1H2BC
227051_at	0.00118	0.000125	1.1918	BACE2
218840_s_at	0.000787	6.08e-05	1.191	NADSYN1
218115_at	4.46e-05	7.88e-07	1.19074	ASF1B
202238_s_at	0.02	0.00751	1.19045	LOC101928916
226319_s_at	0.000396	1.93e-05	1.19016	ALYREF
204981_at	0.000682	4.73e-05	1.18986	SLC22A18
223220_s_at	0.000236	8.7e-06	1.18984	PARP9
235988_at	0.00211	0.000327	1.18936	ADGRF1
209581_at	0.000229	8.33e-06	1.18917	PLA2G16
224596_at	2.05e-06	9.34e-09	1.18863	SLC44A1
200738_s_at	4.11e-06	2.55e-08	1.18838	PGK1
205072_s_at	7.68e-05	1.7e-06	1.18813	XRCC4
207826_s_at	0.00211	0.000327	1.18726	ID3
202239_at	2.04e-05	2.55e-07	1.18699	PARP4
236471_at	2.99e-05	4.43e-07	1.18689	NFE2L3
230206_at	2.73e-05	3.84e-07	1.18669	DOCK5
211911_x_at	0.00119	0.000127	1.18584	HLA-B
217497_at	0.000686	4.78e-05	1.18571	TYMP
204109_s_at	6.83e-05	1.44e-06	1.18569	NFYA
211297_s_at	3.33e-05	5.15e-07	1.18546	CDK7
217584_at	0.000131	3.65e-06	1.18516	NPC1
220617_s_at	0.000951	8.44e-05	1.18514	ZNF532
204567_s_at	0.00257	0.000441	1.18442	ABCG1
205595_at	0.0155	0.00537	1.18422	DSG3
228080_at	0.00482	0.00111	1.18418	LAYN
202153_s_at	7.37e-05	1.6e-06	1.18376	NUP62
203358_s_at	1.83e-05	2.17e-07	1.18372	EZH2
219648_at	2.62e-05	3.65e-07	1.18363	MREG
226695_at	0.0145	0.00493	1.18359	PRRX1
219946_x_at	0.000409	2.03e-05	1.1822	MYH14
211981_at	0.00759	0.0021	1.18104	COL4A1
218454_at	6.82e-06	5.21e-08	1.18099	PLBD1
210895_s_at	0.0187	0.00687	1.18065	CD86
1558217_at	0.000989	9.09e-05	1.18063	SLFN13
205822_s_at	0.00276	0.000492	1.18024	HMGCS1
213798_s_at	4.36e-05	7.55e-07	1.18024	CAP1
202597_at	0.000665	4.52e-05	1.17975	IRF6
229233_at	0.00301	0.000561	1.17969	NRG3
224701_at	0.000238	8.84e-06	1.17908	PARP14
1558732_at	0.000269	1.07e-05	1.17885	MAP4K4
235075_at	0.0242	0.00956	1.17839	DSG3
203918_at	7.78e-05	1.74e-06	1.17818	PCDH1
211828_s_at	0.000282	1.15e-05	1.17813	TNIK
201601_x_at	0.00467	0.00106	1.17808	IFITM2
208729_x_at	0.000883	7.43e-05	1.1776	HLA-B
238075_at	0.000809	6.37e-05	1.17712	CHEK1
220110_s_at	0.0083	0.00237	1.17711	NXF3
205054_at	0.0357	0.0156	1.17565	NEB
236741_at	0.0253	0.0101	1.17521	WDR72
210074_at	6.43e-05	1.32e-06	1.17393	CTSV
227966_s_at	0.000212	7.45e-06	1.17386	CCDC74B
213988_s_at	0.00161	0.00021	1.17217	SAT1
238852_at	0.00871	0.00253	1.17164	PRRX1
209204_at	0.000504	2.87e-05	1.17093	LMO4
218336_at	3.37e-05	5.3e-07	1.17039	PFDN2
228069_at	9.16e-05	2.21e-06	1.16946	MTFR2
200750_s_at	0.000269	1.07e-05	1.16926	RAN
203304_at	0.00111	0.000113	1.16922	BAMBI
204493_at	0.000162	5.01e-06	1.16852	BID
213816_s_at	0.00065	4.36e-05	1.16836	MET
227897_at	0.000839	6.77e-05	1.16824	RAP2B
219454_at	0.00282	0.000511	1.16806	EGFL6
202497_x_at	0.00178	0.00025	1.16728	SLC2A3
212581_x_at	2.61e-06	1.31e-08	1.16713	GAPDH
221676_s_at	0.000431	2.21e-05	1.16641	CORO1C
206693_at	0.00117	0.000123	1.16606	IL7
214924_s_at	0.000232	8.47e-06	1.16564	TRAK1
226789_at	0.00372	0.000765	1.16525	EMB
202067_s_at	0.00287	0.000525	1.16472	LDLR
230906_at	0.000959	8.56e-05	1.16433	GALNT10
218657_at	0.00644	0.00168	1.16404	RAPGEFL1
218800_at	0.00275	0.000489	1.16362	SRD5A3
1554895_a_at	7.96e-05	1.82e-06	1.16283	RHBDL2
201130_s_at	0.00236	0.000389	1.16224	CDH1
226416_at	0.000484	2.68e-05	1.16219	ERI1
209762_x_at	0.00146	0.000179	1.16214	SP110
201125_s_at	0.000169	5.33e-06	1.16211	ITGB5
1555730_a_at	0.000192	6.46e-06	1.16168	CFL1
200638_s_at	3.22e-06	1.8e-08	1.1613	YWHAZ
208623_s_at	1.77e-05	2.06e-07	1.16116	EZR
214875_x_at	5.39e-06	3.76e-08	1.16071	APLP2
219722_s_at	0.000804	6.29e-05	1.16068	GDPD3
227961_at	0.00141	0.000169	1.16035	CTSB
90265_at	2.47e-05	3.34e-07	1.15972	ADAP1
37117_at	0.000175	5.63e-06	1.15958	PRR5-ARHGAP8
226105_at	5.56e-06	3.96e-08	1.15927	C1GALT1
213172_at	0.000475	2.6e-05	1.1587	TTC9
218996_at	0.000131	3.67e-06	1.15831	TFPT
1555630_a_at	0.00804	0.00227	1.15701	NARR
204913_s_at	0.00493	0.00115	1.15589	SOX11
228303_at	0.001	9.28e-05	1.15436	GALNT6
117_at	0.0219	0.00841	1.15426	HSPA6
205470_s_at	0.0476	0.0223	1.15385	KLK11
205093_at	4.87e-05	9.12e-07	1.15362	PLEKHA6
225021_at	0.00155	0.000198	1.15301	ZNF532
223158_s_at	0.000697	4.93e-05	1.15293	NEK6
228585_at	0.00194	0.000285	1.15258	ENTPD1
222773_s_at	0.000871	7.25e-05	1.15254	GALNT12
241954_at	0.000407	2.02e-05	1.15236	FDFT1
223723_at	0.00138	0.000163	1.15187	MELTF
213274_s_at	0.00148	0.000185	1.15175	CTSB
200966_x_at	5.46e-06	3.84e-08	1.1516	ALDOA
228573_at	0.0013	0.000149	1.15148	ANTXR2
1557094_at	0.00173	0.000238	1.15133	LOC100996760
224996_at	0.000486	2.7e-05	1.15112	ASPH
64408_s_at	0.00264	0.000461	1.14986	CALML4
226534_at	0.00235	0.000387	1.14971	KITLG
229254_at	0.00862	0.00249	1.14959	MFSD4A
235458_at	0.00716	0.00193	1.14914	HAVCR2
227642_at	0.000218	7.79e-06	1.1486	TFCP2L1
213518_at	3.87e-07	7.02e-10	1.14825	PRKCI
209205_s_at	0.000416	2.09e-05	1.14767	LMO4
221664_s_at	8.34e-06	6.78e-08	1.14691	F11R
219614_s_at	0.00805	0.00227	1.14688	SLC6A20
216661_x_at	0.0129	0.00425	1.14682	CYP2C9
202589_at	0.000233	8.54e-06	1.14656	TYMS
218261_at	0.000427	2.18e-05	1.14646	AP1M2
225835_at	0.000824	6.58e-05	1.14585	SLC12A2
236083_at	0.00571	0.00142	1.14568	BCL2L15
46323_at	3.73e-05	6.03e-07	1.14561	CANT1
213975_s_at	0.00261	0.000454	1.14549	LYZ
213923_at	0.000277	1.12e-05	1.14488	RAP2B
213765_at	0.0309	0.013	1.14441	MFAP5
224773_at	0.000753	5.65e-05	1.14434	NAV1
204638_at	0.00427	0.000934	1.14407	ACP5
212336_at	0.000281	1.15e-05	1.14387	EPB41L1
217187_at	0.0215	0.00823	1.1437	MUC5AC
1553099_at	1.53e-05	1.69e-07	1.14316	TIGD1
226988_s_at	0.000985	9.02e-05	1.14314	MYH14
210087_s_at	0.000564	3.46e-05	1.14212	MPZL1
226609_at	0.000146	4.36e-06	1.14194	DCBLD1
208002_s_at	0.0012	0.000129	1.14193	ACOT7
242037_at	0.000608	3.93e-05	1.14154	ASPH
218741_at	0.000705	5.03e-05	1.14131	CENPM
234963_s_at	0.000304	1.29e-05	1.14056	FA2H
227804_at	7.42e-05	1.62e-06	1.13998	TLCD1
234932_s_at	4.81e-05	8.98e-07	1.13913	CDCP1
216511_s_at	4.6e-06	2.99e-08	1.13887	TCF7L2
201720_s_at	0.0225	0.00871	1.13884	LAPTM5
218880_at	0.00178	0.000248	1.13881	FOSL2
221269_s_at	0.00017	5.38e-06	1.13873	SH3BGRL3
226077_at	0.000311	1.34e-05	1.13811	RNF145
216236_s_at	0.00358	0.000722	1.13727	SLC2A14
218319_at	1.06e-05	9.96e-08	1.13705	PELI1
222039_at	0.000694	4.89e-05	1.13704	KIF18B
211429_s_at	0.00812	0.0023	1.13653	SERPINA1
222547_at	0.000388	1.87e-05	1.13573	MAP4K4
1554921_a_at	0.00244	0.000408	1.13554	SCEL
204806_x_at	0.00046	2.46e-05	1.13552	HLA-F
233446_at	0.0105	0.00322	1.13549	ONECUT2
208864_s_at	1.63e-06	6.72e-09	1.13525	TXN
205263_at	8.03e-06	6.47e-08	1.1347	BCL10
201861_s_at	3.17e-06	1.76e-08	1.13468	LRRFIP1
218252_at	0.000132	3.73e-06	1.13388	CKAP2
204608_at	4.71e-06	3.1e-08	1.1338	ASL
221732_at	0.000182	5.99e-06	1.13345	CANT1
213700_s_at	1.49e-05	1.62e-07	1.13326	PKM
217398_x_at	1.37e-05	1.43e-07	1.13308	GAPDH
202765_s_at	0.0291	0.012	1.13282	FBN1
203967_at	0.00158	0.000205	1.1328	CDC6
229879_at	0.000662	4.48e-05	1.13241	ASPH
235296_at	0.000941	8.28e-05	1.13204	EIF5A2
218872_at	0.00922	0.00272	1.13169	TESC
219836_at	0.00362	0.000734	1.13165	ZBED2
232103_at	0.000358	1.65e-05	1.13081	BPNT1
219150_s_at	3.44e-05	5.43e-07	1.13071	ADAP1
231775_at	6.17e-05	1.24e-06	1.1305	TNFRSF10A
218663_at	0.000221	7.94e-06	1.13017	NCAPG
230036_at	0.0017	0.000231	1.13	SAMD9L
202006_at	4.77e-05	8.82e-07	1.12912	PTPN12
1553678_a_at	0.000247	9.33e-06	1.12879	ITGB1
209651_at	0.00776	0.00216	1.12829	TGFB1I1
202734_at	1.62e-05	1.82e-07	1.12826	TRIP10
208637_x_at	0.000254	9.75e-06	1.12819	ACTN1
227747_at	3.09e-06	1.69e-08	1.12808	MPZL3
212632_at	0.00142	0.000171	1.12775	STX7
204345_at	0.00668	0.00176	1.12735	COL16A1
202609_at	2.75e-05	3.91e-07	1.12643	EPS8
202771_at	0.00105	0.000103	1.12607	PIEZO1
209678_s_at	2.81e-06	1.5e-08	1.12606	PRKCI
200755_s_at	0.00017	5.38e-06	1.12591	CALU
213272_s_at	1.82e-05	2.13e-07	1.12564	TMEM159
223361_at	0.000312	1.35e-05	1.12551	ABRACL
223101_s_at	0.000213	7.48e-06	1.12537	ARPC5L
218474_s_at	1.05e-05	9.74e-08	1.12474	KCTD5
226000_at	9.13e-05	2.19e-06	1.12464	CTTNBP2NL
224927_at	0.00419	0.00091	1.1243	PPP1R18
210715_s_at	7.81e-05	1.75e-06	1.12142	SPINT2
225008_at	0.000607	3.92e-05	1.12139	ASPH
212666_at	0.000208	7.24e-06	1.12098	SMURF1
200640_at	3.99e-06	2.43e-08	1.1205	YWHAZ
205633_s_at	6.59e-05	1.36e-06	1.12012	ALAS1
202357_s_at	0.0156	0.00542	1.11998	CFB
209940_at	6.95e-05	1.48e-06	1.11994	PARP3
203233_at	0.000666	4.53e-05	1.11982	IL4R
201721_s_at	0.0147	0.00505	1.11968	LAPTM5
207419_s_at	0.00627	0.00162	1.11964	RAC2
212473_s_at	0.000607	3.91e-05	1.11884	MICAL2
216915_s_at	0.000267	1.06e-05	1.11766	PTPN12
242814_at	0.002	0.000301	1.11765	SERPINB9
230135_at	0.00114	0.000118	1.1169	HHIP
223249_at	1.51e-07	1.82e-10	1.11676	CLDN12
222443_s_at	2.81e-05	4.01e-07	1.11671	RBM8A
235085_at	0.000607	3.91e-05	1.11562	SGK223
238513_at	7.97e-05	1.82e-06	1.11463	PRRG4
214697_s_at	3.78e-05	6.15e-07	1.1145	PTBP3
213571_s_at	7.81e-05	1.75e-06	1.11421	EIF4E2
210540_s_at	3.28e-05	5.03e-07	1.11348	B4GALT4
206628_at	0.0484	0.0228	1.11322	SLC5A1
1554438_at	8.04e-07	2.27e-09	1.11289	KIAA1217
211750_x_at	0.000212	7.47e-06	1.11198	TUBA1C
224911_s_at	0.00301	0.000563	1.11163	DCBLD2
228141_at	0.00341	0.000673	1.11161	GPX8
222922_at	0.00612	0.00156	1.11101	KCNE3
208614_s_at	7.62e-05	1.68e-06	1.11099	FLNB
228628_at	0.00131	0.00015	1.11081	SRGAP2C
222877_at	0.00332	0.000648	1.11058	NRP2
208657_s_at	0.000166	5.18e-06	1.11049	SEP9
212759_s_at	1.1e-05	1.04e-07	1.11043	TCF7L2
213412_at	0.0012	0.00013	1.11016	TJP3
201329_s_at	0.00159	0.000206	1.1086	ETS2
217997_at	0.000555	3.38e-05	1.10852	PHLDA1
206102_at	0.000941	8.26e-05	1.10844	GINS1
227607_at	0.00022	7.87e-06	1.10841	STAMBPL1
221648_s_at	0.0116	0.00369	1.10836	AGMAT
216903_s_at	2.73e-05	3.85e-07	1.10786	MICU1
212587_s_at	0.0382	0.017	1.10663	PTPRC
200824_at	5.54e-06	3.93e-08	1.10607	GSTP1
218308_at	0.000166	5.2e-06	1.10558	TACC3
204601_at	4.07e-05	6.89e-07	1.10518	N4BP1
208893_s_at	0.000164	5.09e-06	1.10477	DUSP6
228367_at	0.00573	0.00143	1.10458	ALPK2
228705_at	0.00126	0.00014	1.10436	CAPN12
226122_at	0.00299	0.000556	1.10402	PLEKHG1
218928_s_at	3.8e-05	6.23e-07	1.10379	SLC37A1
221794_at	0.000111	2.91e-06	1.10361	DOCK6
225841_at	0.00357	0.000719	1.10297	HENMT1
218000_s_at	7.41e-05	1.62e-06	1.10291	PHLDA1
202790_at	0.0015	0.000187	1.10268	CLDN7
215501_s_at	0.0015	0.000189	1.10225	DUSP10
226071_at	0.00627	0.00162	1.10207	ADAMTSL4
232046_at	0.0004	1.96e-05	1.10201	KIAA1217
210972_x_at	0.0471	0.022	1.10193	TRAC
1567107_s_at	0.00109	0.00011	1.10171	TPM4
212570_at	0.00547	0.00134	1.10037	ENDOD1
210605_s_at	0.00402	0.000855	1.10017	MFGE8
243444_at	0.00394	0.000832	1.09995	SRD5A3
215037_s_at	0.00058	3.62e-05	1.09983	BCL2L1
225973_at	0.00363	0.000738	1.09949	TAP2
219540_at	1.83e-05	2.16e-07	1.09924	ZNF267
230343_at	6.14e-05	1.23e-06	1.09868	CST3
1558290_a_at	0.00186	0.000268	1.09859	MIR1204
1558621_at	0.000468	2.54e-05	1.09854	CABLES1
212944_at	3.47e-05	5.53e-07	1.09774	SLC5A3
214958_s_at	0.000174	5.54e-06	1.09712	TMC6
201318_s_at	2.61e-06	1.32e-08	1.09699	MYL12B
214782_at	0.000244	9.15e-06	1.09693	CTTN
238949_at	0.000358	1.65e-05	1.09682	RNF145
204122_at	0.0253	0.0101	1.09672	TYROBP
206976_s_at	0.000129	3.58e-06	1.09552	HSPH1
202953_at	0.0455	0.0211	1.09535	C1QB
230660_at	0.00111	0.000113	1.09511	SERTAD4
210056_at	0.000607	3.92e-05	1.09506	RND1
227889_at	0.00112	0.000114	1.09472	LPCAT2
210594_x_at	6.09e-05	1.21e-06	1.09461	MPZL1
223303_at	0.00409	0.000878	1.09345	FERMT3
225612_s_at	0.000675	4.65e-05	1.09271	B3GNT5
205290_s_at	0.00773	0.00215	1.09183	BMP2
223082_at	0.00108	0.000107	1.09182	SH3KBP1
215009_s_at	6.68e-06	5.05e-08	1.09179	THAP9-AS1
210319_x_at	0.00103	9.82e-05	1.09143	MSX2
1556821_x_at	0.00612	0.00156	1.09123	DLEU2
1569344_a_at	0.0193	0.00714	1.09119	LOC105375172
226421_at	4.73e-05	8.72e-07	1.09102	AMMECR1
202962_at	0.000528	3.11e-05	1.09097	KIF13B
224595_at	4.23e-05	7.3e-07	1.0903	SLC44A1
201631_s_at	0.00183	0.00026	1.08939	IER3
219045_at	0.00026	1.01e-05	1.08922	RHOF
205774_at	0.0021	0.000322	1.08906	F12
229097_at	1.59e-05	1.78e-07	1.08904	DIAPH3
209723_at	0.0143	0.00487	1.08862	SERPINB9
203072_at	1.47e-05	1.6e-07	1.08848	MYO1E
1555812_a_at	0.0144	0.0049	1.08847	ARHGDIB
209124_at	3.8e-05	6.19e-07	1.08829	MYD88
201373_at	0.000655	4.42e-05	1.08792	PLEC
207332_s_at	0.00013	3.62e-06	1.08785	TFRC
209037_s_at	0.00044	2.28e-05	1.0877	EHD1
235643_at	0.003	0.000558	1.08743	SAMD9L
213107_at	0.000168	5.29e-06	1.08736	TNIK
224710_at	0.011	0.00345	1.08665	NARR
206421_s_at	0.00313	0.000594	1.08607	SERPINB7
1554018_at	0.0199	0.00744	1.08577	GPNMB
204675_at	0.000443	2.32e-05	1.08563	SRD5A1
205241_at	0.00151	0.00019	1.08539	SCO2
213929_at	1.95e-05	2.39e-07	1.08536	EXPH5
210861_s_at	0.0255	0.0102	1.08514	WISP3
202043_s_at	1.73e-06	7.34e-09	1.08481	SMS
242013_at	0.00401	0.000853	1.08377	BCL2L15
218795_at	0.000132	3.75e-06	1.08362	ACP6
213422_s_at	0.00534	0.0013	1.08236	MXRA8
202555_s_at	0.0474	0.0222	1.08213	MYLK
207039_at	0.0209	0.00794	1.08115	CDKN2A
228955_at	0.00055	3.33e-05	1.08048	LRP8
214022_s_at	0.00696	0.00186	1.07996	IFITM1
205786_s_at	0.0135	0.00452	1.07947	ITGAM
202022_at	0.00178	0.000248	1.07946	ALDOC
223047_at	1.1e-05	1.06e-07	1.07924	CMTM6
209158_s_at	0.000117	3.11e-06	1.07902	CYTH2
226944_at	0.000894	7.59e-05	1.07782	HTRA3
201790_s_at	0.000706	5.06e-05	1.07733	DHCR7
211549_s_at	0.0098	0.00295	1.07683	HPGD
229374_at	0.00229	0.000371	1.07612	EPHA4
208850_s_at	0.029	0.012	1.0753	THY1
208703_s_at	3.61e-05	5.77e-07	1.07517	APLP2
234995_at	1.24e-06	4.33e-09	1.07512	SPICE1
211139_s_at	1.05e-05	9.75e-08	1.07485	NAB1
227628_at	0.00407	0.000873	1.07461	GPX8
220189_s_at	0.000689	4.82e-05	1.07327	MGAT4B
224707_at	0.000351	1.6e-05	1.07322	CYSTM1
235421_at	0.00574	0.00143	1.07186	MAP3K8
227556_at	0.00789	0.0022	1.07131	NME7
201829_at	3.45e-05	5.47e-07	1.07123	NET1
227212_s_at	0.000327	1.43e-05	1.0703	PHF19
228964_at	0.00943	0.00281	1.06976	PRDM1
226368_at	0.00392	0.000825	1.06961	CHST11
231956_at	0.000702	4.99e-05	1.06933	RNF213
225647_s_at	0.00871	0.00253	1.06877	CTSC
220239_at	0.00043	2.2e-05	1.06875	KLHL7
235276_at	0.00148	0.000183	1.06856	EPSTI1
202626_s_at	0.00208	0.000318	1.06854	LYN
228483_s_at	0.000655	4.41e-05	1.06852	TAF9B
233030_at	0.00436	0.00096	1.06625	PNPLA3
226350_at	0.000349	1.58e-05	1.06603	CHML
232682_at	6.24e-05	1.27e-06	1.06546	MREG
209641_s_at	0.00131	0.000149	1.06511	ABCC3
208921_s_at	6.54e-05	1.35e-06	1.06502	SRI
232510_s_at	9.74e-07	3.05e-09	1.06494	DPP3
210118_s_at	0.0173	0.00623	1.06415	IL1A
206553_at	0.000796	6.21e-05	1.06397	OAS2
213869_x_at	0.014	0.00472	1.06313	THY1
226985_at	0.00198	0.000296	1.06243	FGD5
200756_x_at	0.00121	0.000131	1.06234	CALU
218094_s_at	0.000131	3.71e-06	1.06208	SYS1-DBNDD2
206448_at	0.00847	0.00243	1.06206	ZNF365
219099_at	0.00105	0.000101	1.06171	TIGAR
213349_at	8.72e-06	7.29e-08	1.06103	TMCC1
213038_at	0.00178	0.000249	1.06052	RNF19B
210950_s_at	0.000767	5.83e-05	1.06041	FDFT1
215714_s_at	0.000213	7.49e-06	1.06036	SMARCA4
203821_at	0.0055	0.00135	1.05969	HBEGF
211465_x_at	0.000433	2.23e-05	1.05917	FUT6
200896_x_at	4.05e-05	6.84e-07	1.05916	HDGF
201614_s_at	3.31e-05	5.1e-07	1.05899	RUVBL1
229674_at	0.000494	2.79e-05	1.05873	SERTAD4
1564064_a_at	3.8e-05	6.23e-07	1.05751	ATP11B
212895_s_at	0.000823	6.56e-05	1.05745	ABR
226603_at	0.00105	0.000102	1.05737	SAMD9L
239595_at	0.00771	0.00214	1.05708	GPX2
215313_x_at	0.000709	5.11e-05	1.0569	HLA-A
204092_s_at	0.0019	0.000276	1.05679	AURKA
208836_at	0.000913	7.85e-05	1.05659	ATP1B3
220266_s_at	0.00972	0.00292	1.05538	KLF4
202014_at	0.00193	0.000282	1.05531	PPP1R15A
211031_s_at	0.00317	0.000605	1.05507	CLIP2
204729_s_at	0.000245	9.24e-06	1.05496	STX1A
200885_at	0.000146	4.36e-06	1.05496	RHOC
1554600_s_at	0.000574	3.56e-05	1.05426	LMNA
227740_at	0.00209	0.00032	1.05397	UHMK1
211564_s_at	0.0182	0.00664	1.05351	PDLIM4
207076_s_at	0.0022	0.000346	1.05332	ASS1
201876_at	0.000123	3.33e-06	1.05329	PON2
214587_at	0.0146	0.00499	1.05326	COL8A1
218728_s_at	2.09e-05	2.66e-07	1.05309	CNIH4
211906_s_at	0.0264	0.0107	1.05308	SERPINB4
204455_at	0.00047	2.57e-05	1.05288	DST
203440_at	0.000459	2.45e-05	1.0523	CDH2
202638_s_at	0.00908	0.00266	1.05177	ICAM1
205618_at	0.000175	5.62e-06	1.05115	PRRG1
239525_at	0.000122	3.32e-06	1.05062	CTTNBP2NL
206242_at	0.0224	0.00867	1.05041	TM4SF5
209875_s_at	0.0323	0.0138	1.05039	SPP1
213622_at	0.000511	2.93e-05	1.05036	COL9A2
211368_s_at	0.017	0.00606	1.05004	CASP1
201644_at	0.000267	1.06e-05	1.04993	TSTA3
204319_s_at	0.0156	0.00542	1.04972	RGS10
223452_s_at	3.64e-05	5.86e-07	1.04936	ATL3
204484_at	4.37e-05	7.64e-07	1.04932	PIK3C2B
218686_s_at	2.3e-05	3.02e-07	1.04926	RHBDF1
205293_x_at	0.000607	3.91e-05	1.04911	BAIAP2
202826_at	0.0017	0.000231	1.04897	SPINT1
218634_at	0.000543	3.25e-05	1.04882	PHLDA3
206420_at	0.0186	0.00682	1.04868	IGSF6
201548_s_at	7.33e-07	1.93e-09	1.04784	KDM5B
202498_s_at	0.00718	0.00194	1.04784	SLC2A3
202531_at	0.0013	0.000147	1.04778	IRF1
231880_at	0.00753	0.00207	1.04767	STRIP2
233587_s_at	0.00284	0.000518	1.04717	SIPA1L2
204709_s_at	0.000133	3.8e-06	1.0469	KIF23
204767_s_at	3.98e-05	6.65e-07	1.04683	FEN1
212762_s_at	0.000339	1.51e-05	1.04675	TCF7L2
223993_s_at	0.000139	4.07e-06	1.04668	CNIH4
233887_at	0.0038	0.000787	1.04664	ADGRG6
206407_s_at	0.0107	0.0033	1.0466	CCL13
218224_at	0.000889	7.51e-05	1.04636	PNMA1
212446_s_at	0.000103	2.59e-06	1.04611	CERS6
227672_at	3.8e-05	6.22e-07	1.04526	MROH6
210665_at	0.00327	0.000633	1.04504	TFPI
207620_s_at	5.65e-05	1.11e-06	1.04433	CASK
36711_at	0.00309	0.000584	1.04403	MAFF
201510_at	0.00533	0.00129	1.04398	ELF3
223186_at	1.87e-05	2.24e-07	1.04334	TMEM189-UBE2V1
211921_x_at	3.34e-05	5.19e-07	1.04303	LOC100506248
209945_s_at	0.000374	1.77e-05	1.04233	GSK3B
200765_x_at	1.49e-06	5.61e-09	1.04232	CTNNA1
201875_s_at	2.88e-05	4.17e-07	1.04166	MPZL1
203882_at	0.000194	6.52e-06	1.04095	IRF9
217436_x_at	0.000527	3.09e-05	1.04087	HLA-J
204657_s_at	0.000475	2.61e-05	1.04074	SHB
201874_at	9.35e-05	2.27e-06	1.03963	MPZL1
213011_s_at	0.000202	6.92e-06	1.03952	TPI1
1555292_at	0.0106	0.00327	1.03938	STRIP2
218077_s_at	5.28e-06	3.65e-08	1.03879	ZDHHC3
219382_at	0.000361	1.68e-05	1.03841	SERTAD3
1555895_at	0.000164	5.09e-06	1.03801	DNM2
225402_at	6.41e-05	1.31e-06	1.03638	TP53RK
204136_at	0.00061	3.94e-05	1.03587	COL7A1
200931_s_at	0.000132	3.73e-06	1.03543	VCL
205306_x_at	0.00756	0.00208	1.03534	KMO
221922_at	0.000705	5.03e-05	1.03531	GPSM2
205397_x_at	0.000328	1.44e-05	1.03456	SMAD3
1555734_x_at	1.19e-05	1.17e-07	1.03406	AP1S3
213646_x_at	0.000243	9.1e-06	1.03397	TUBA1B
202275_at	0.0012	0.000129	1.03377	G6PD
200863_s_at	1.22e-05	1.23e-07	1.03329	RAB11A
219479_at	0.00318	0.000608	1.03329	KDELC1
1553995_a_at	0.00294	0.000541	1.03295	NT5E
202525_at	0.0107	0.00333	1.03274	PRSS8
218606_at	9.55e-06	8.49e-08	1.03246	ZDHHC7
218885_s_at	0.00146	0.000178	1.03192	GALNT12
209933_s_at	0.00915	0.00269	1.03032	CD300A
225590_at	0.000483	2.67e-05	1.03005	SH3RF1
214895_s_at	6.91e-05	1.47e-06	1.03	ADAM10
218473_s_at	0.000157	4.8e-06	1.02998	COLGALT1
212141_at	3.35e-05	5.22e-07	1.02785	MCM4
201088_at	4.07e-05	6.91e-07	1.02718	KPNA2
217946_s_at	0.000204	7.08e-06	1.0256	SAE1
227753_at	0.0203	0.00763	1.02504	TMEM139
220085_at	0.000835	6.71e-05	1.02432	HELLS
211661_x_at	0.0026	0.000449	1.02327	PTAFR
204519_s_at	0.00589	0.00148	1.02323	PLLP
230229_at	1.83e-05	2.18e-07	1.02202	DLG1
232079_s_at	0.00341	0.000674	1.02191	NECTIN2
218556_at	1.49e-06	5.59e-09	1.02188	ORMDL2
203332_s_at	0.0258	0.0104	1.02159	INPP5D
204334_at	0.00108	0.000107	1.02153	KLF7
243999_at	0.00228	0.000368	1.02133	SLFN5
212442_s_at	0.000168	5.31e-06	1.02132	CERS6
208636_at	0.00032	1.39e-05	1.02098	ACTN1
205547_s_at	0.0259	0.0104	1.02027	TAGLN
224594_x_at	0.000139	4.09e-06	1.01987	ACTB
219725_at	0.0402	0.0181	1.01975	TREM2
1560916_a_at	3.92e-05	6.53e-07	1.0197	DPY19L1
212724_at	0.00385	0.000804	1.01948	RND3
209468_at	0.00108	0.000107	1.01856	LRP5
1554696_s_at	0.00157	0.000203	1.01849	TYMS
232360_at	0.00122	0.000132	1.01835	EHF
216041_x_at	0.000482	2.66e-05	1.01805	GRN
203411_s_at	0.000424	2.15e-05	1.01804	LMNA
202871_at	0.000218	7.77e-06	1.01782	TRAF4
216202_s_at	7.16e-05	1.54e-06	1.01777	SPTLC2
209251_x_at	0.000291	1.2e-05	1.01776	TUBA1C
201090_x_at	0.000245	9.26e-06	1.01776	TUBA1B
209231_s_at	6.09e-05	1.22e-06	1.01773	DCTN5
210405_x_at	0.000654	4.4e-05	1.01692	TNFRSF10B
200634_at	0.000526	3.09e-05	1.01689	PFN1
206377_at	0.00532	0.00128	1.01617	FOXF2
221761_at	2.86e-06	1.54e-08	1.01561	ADSS
232078_at	0.00362	0.000735	1.01557	NECTIN2
202687_s_at	0.00212	0.000328	1.01547	TNFSF10
214500_at	0.00555	0.00137	1.01486	H2AFY
217918_at	5.55e-05	1.08e-06	1.01465	DYNLRB1
225597_at	0.000218	7.79e-06	1.0145	SLC45A4
205659_at	0.00189	0.000274	1.01436	HDAC9
243463_s_at	0.000262	1.03e-05	1.01368	RIT1
204875_s_at	0.00738	0.00201	1.01358	GMDS
205020_s_at	0.00147	0.000182	1.01347	ARL4A
222958_s_at	0.00262	0.000455	1.01335	DEPDC1
226086_at	0.0106	0.00329	1.01313	SYT13
230263_s_at	8.09e-06	6.54e-08	1.01301	DOCK5
242963_at	0.000994	9.2e-05	1.01298	SGMS2
202988_s_at	0.0353	0.0154	1.01296	RGS1
219735_s_at	0.000197	6.66e-06	1.01282	TFCP2L1
223174_at	4.85e-05	9.07e-07	1.01239	BTBD10
230165_at	0.000264	1.04e-05	1.01197	SGO2
227046_at	9.09e-05	2.18e-06	1.01169	SLC39A11
218611_at	0.00143	0.000173	1.01082	IER5
218180_s_at	0.00439	0.000971	1.01075	EPS8L2
208875_s_at	0.000463	2.5e-05	1.01	PAK2
200752_s_at	0.000277	1.12e-05	1.00974	CAPN1
215129_at	0.036	0.0158	1.00937	PIK3C2G
207034_s_at	0.00413	0.00089	1.00933	GLI2
205729_at	0.00304	0.00057	1.00913	OSMR
218340_s_at	0.00523	0.00126	1.00846	UBA6
223159_s_at	0.000424	2.16e-05	1.00743	NEK6
228365_at	0.000176	5.69e-06	1.00656	CPNE8
221474_at	1.52e-05	1.67e-07	1.00653	MYL12B
213746_s_at	0.0098	0.00295	1.00615	FLNA
225646_at	0.0144	0.00488	1.00595	CTSC
201438_at	0.0213	0.00811	1.00593	COL6A3
209925_at	0.00239	0.000394	1.00568	OCLN
221898_at	0.0119	0.00383	1.00514	PDPN
222221_x_at	0.000992	9.17e-05	1.00511	EHD1
218826_at	0.000188	6.26e-06	1.00497	SLC35F2
201616_s_at	0.0139	0.00467	1.00488	CALD1
205623_at	0.0448	0.0207	1.00482	ALDH3A1
208890_s_at	0.000243	9.11e-06	1.00439	PLXNB2
230788_at	0.0254	0.0102	1.00426	GCNT2
224598_at	0.00026	1.01e-05	1.00386	MGAT4B
225365_at	6.17e-06	4.56e-08	1.00379	ZDHHC20
225566_at	0.000792	6.15e-05	1.00368	NRP2
228236_at	0.00442	0.000982	1.00292	SLC52A3
218181_s_at	0.000783	6.03e-05	1.00228	MAP4K4
235165_at	0.00151	0.000189	1.00221	PARD6B
208908_s_at	3.22e-06	1.81e-08	1.00141	CAST
235003_at	0.000741	5.53e-05	1.00101	UHMK1
226246_at	0.000132	3.75e-06	1.00096	KCTD1
204459_at	9.57e-05	2.33e-06	1.00093	CSTF2
1558365_at	0.000595	3.79e-05	1.00037	PGK1
218782_s_at	0.00181	0.000256	1.0002	ATAD2
213933_at	0.00225	0.000358	-1.00188	PTGER3
205413_at	0.000223	8.03e-06	-1.00502	MPPED2
239765_at	0.00037	1.74e-05	-1.00508	CPEB3
236335_at	0.00478	0.0011	-1.00605	GUCY1A2
225001_at	0.0112	0.00351	-1.00629	RAB3D
209292_at	0.00175	0.000242	-1.0074	ID4
231978_at	0.00156	0.0002	-1.00863	TPCN2
227053_at	0.000103	2.6e-06	-1.00875	PACSIN1
205399_at	0.00534	0.00129	-1.00946	DCLK1
202146_at	0.00219	0.000345	-1.0096	IFRD1
205612_at	0.00282	0.00051	-1.01055	MMRN1
1555450_a_at	4.15e-05	7.08e-07	-1.01057	NAA16
204288_s_at	0.0112	0.00351	-1.01112	SORBS2
233720_at	0.0267	0.0108	-1.01185	SORBS2
233903_s_at	7.34e-05	1.59e-06	-1.01264	ARHGEF26
209220_at	0.0027	0.000476	-1.01313	GPC3
206888_s_at	0.00059	3.74e-05	-1.01318	ARHGDIG
220987_s_at	0.00116	0.000121	-1.01446	NUAK2
200810_s_at	5.02e-05	9.52e-07	-1.01574	CIRBP
239884_at	0.015	0.00514	-1.01834	CADPS
204560_at	0.0164	0.00582	-1.01873	FKBP5
237619_at	0.000229	8.32e-06	-1.01881	FAM217A
231050_at	0.00398	0.000845	-1.02056	HRASLS5
223467_at	0.00756	0.00208	-1.021	RASD1
1560112_at	0.000436	2.25e-05	-1.02122	WDFY2
221974_at	0.000349	1.59e-05	-1.02229	LOC101930404
243278_at	0.00218	0.000343	-1.02241	FOXP2
214091_s_at	0.00643	0.00167	-1.02294	GPX3
221614_s_at	0.000352	1.61e-05	-1.02361	RPH3AL
221031_s_at	0.00122	0.000132	-1.02408	APOLD1
200811_at	6.7e-05	1.4e-06	-1.02433	CIRBP
205614_x_at	0.00228	0.000368	-1.02672	MST1
205384_at	0.00171	0.000233	-1.02875	FXYD1
206109_at	0.00814	0.0023	-1.02934	FUT1
242426_at	0.00226	0.00036	-1.03028	NRG4
202843_at	0.00251	0.000426	-1.03134	DNAJB9
229476_s_at	0.0155	0.00538	-1.03356	THRSP
235977_at	0.00352	0.000705	-1.03591	LONRF2
225912_at	0.000689	4.81e-05	-1.03592	TP53INP1
209230_s_at	0.0116	0.00371	-1.03648	NUPR1
228568_at	0.00082	6.5e-05	-1.03677	MYZAP
223623_at	0.0259	0.0104	-1.03748	C2orf40
1560698_a_at	0.00231	0.000375	-1.03869	TRHDE-AS1
222043_at	0.00492	0.00115	-1.03874	CLU
1564339_a_at	0.00197	0.000292	-1.03952	CHRM3
207776_s_at	8.5e-06	6.97e-08	-1.04025	CACNB2
242323_at	4.44e-05	7.84e-07	-1.04059	PLA2G12A
202975_s_at	0.00534	0.00129	-1.04329	RHOBTB3
229169_at	9.58e-05	2.34e-06	-1.0441	CFAP70
225540_at	0.00779	0.00217	-1.047	MAP2
235626_at	0.000705	5.01e-05	-1.04802	CAMK1D
228523_at	0.00508	0.0012	-1.04989	NANOS1
227985_at	0.00132	0.000152	-1.05111	LOC100506098
236300_at	0.00694	0.00185	-1.05131	PDE3A
229290_at	0.00118	0.000124	-1.05475	DAPL1
1554755_a_at	0.00103	9.86e-05	-1.05769	MTUS2
235561_at	8.07e-05	1.86e-06	-1.05824	TXNL1
228325_at	4.17e-05	7.16e-07	-1.05916	SPIDR
215559_at	0.00863	0.00249	-1.05963	LOC101930322
1564494_s_at	0.0113	0.00357	-1.05965	P4HB
230418_s_at	0.00216	0.000337	-1.06075	GALNT16
216049_at	0.00443	0.000986	-1.062	RHOBTB3
216048_s_at	0.00815	0.00231	-1.06215	RHOBTB3
228831_s_at	2.54e-05	3.48e-07	-1.06247	GNG7
236222_at	0.000262	1.03e-05	-1.06274	MAATS1
214582_at	0.0012	0.000128	-1.06329	PDE3B
229721_x_at	0.000824	6.57e-05	-1.0633	DERL3
221453_at	0.00421	0.000917	-1.06374	G6PC2
220306_at	0.000643	4.28e-05	-1.06454	FAM46C
218653_at	0.00417	0.000906	-1.06489	SLC25A15
232136_s_at	0.000182	6.01e-06	-1.06518	CTTNBP2
225424_at	0.00455	0.00102	-1.06675	GPAM
213006_at	3.37e-05	5.28e-07	-1.06704	CEBPD
218806_s_at	0.00719	0.00194	-1.06768	VAV3
200962_at	0.00352	0.000706	-1.06779	RPL31
206159_at	0.000585	3.69e-05	-1.0679	GDF10
226982_at	0.000252	9.64e-06	-1.06826	ELL2
235079_at	0.00113	0.000117	-1.06887	ZNF704
221589_s_at	6.24e-05	1.27e-06	-1.0691	ALDH6A1
230624_at	0.00085	6.95e-05	-1.07008	SLC25A27
221928_at	9.62e-05	2.36e-06	-1.07047	ACACB
204955_at	0.0185	0.00679	-1.0707	SRPX
228391_at	0.000481	2.66e-05	-1.07209	CYP4V2
226705_at	7.9e-05	1.79e-06	-1.07312	FGFR1
209496_at	0.00365	0.000743	-1.07317	RARRES2
230417_at	2.67e-06	1.38e-08	-1.0737	GALNT16
209167_at	0.00943	0.00281	-1.07478	GPM6B
213737_x_at	0.000296	1.24e-05	-1.07488	GOLGA8N
239210_at	0.00233	0.000381	-1.07533	LOC102724387
203438_at	0.00645	0.00168	-1.07572	STC2
232593_at	0.0171	0.00612	-1.07729	NEURL3
227195_at	0.00332	0.000647	-1.07782	ZNF503
220937_s_at	0.000129	3.59e-06	-1.07908	ST6GALNAC4
209462_at	0.000874	7.3e-05	-1.08203	APLP1
207401_at	0.0115	0.00363	-1.08221	PROX1
213228_at	0.00158	0.000204	-1.08306	PDE8B
214834_at	5.91e-06	4.31e-08	-1.08313	PWAR5
218168_s_at	0.000246	9.29e-06	-1.08409	COQ8A
238919_at	0.000224	8.11e-06	-1.08615	PCDH9
210198_s_at	0.0122	0.00393	-1.08687	PLP1
228370_at	0.000165	5.17e-06	-1.08701	LOC101930404
1559214_at	0.00259	0.000446	-1.08798	FBXO22
228469_at	0.00264	0.000462	-1.08809	PPID
[truncated: 547 more rows]

## Sheet: GSE32676
ID	adj.P.Val	P.Value	logFC	Gene.symbol
201884_at	0.0011281	1.45e-06	6.81	CEACAM5
204351_at	0.0003364	1.6e-07	6.75	S100P
204885_s_at	5.29e-05	2.9e-09	6.44	MSLN
201650_at	0.0001693	2.17e-08	6.22	KRT19
219795_at	0.0020798	5.52e-06	5.88	SLC6A14
203757_s_at	0.0036739	1.54e-05	5.85	CEACAM6
218960_at	0.000136	1.49e-08	5.76	TMPRSS4
211657_at	0.0029107	1.11e-05	5.72	CEACAM6
209173_at	0.0002504	6e-08	5.69	AGR2
223631_s_at	5.29e-05	2.15e-09	5.67	C19orf33
204855_at	7.36e-05	5.39e-09	5.62	SERPINB5
203878_s_at	0.0002995	1.37e-07	5.44	MMP11
202489_s_at	0.0001866	2.73e-08	5.39	FXYD3
202504_at	0.0012938	1.99e-06	5.31	TRIM29
229030_at	0.0030735	1.2e-05	5.28	CAPN8
214476_at	0.0215962	0.000313	5.19	TFF2
209792_s_at	0.0013039	2.05e-06	5.15	KLK10
205927_s_at	0.009362	7.67e-05	5.12	CTSE
205009_at	0.0137165	0.000144	5.06	TFF1
33323_r_at	0.0007451	6.95e-07	5	SFN
226535_at	0.0012901	1.93e-06	4.96	LOC100505984
202267_at	0.0002728	9.44e-08	4.93	LAMC2
206224_at	0.0016163	3.04e-06	4.9	CST1
209270_at	0.0002728	9.1e-08	4.87	LAMB3
238017_at	0.0026992	9.73e-06	4.78	SDR16C5
209016_s_at	0.0004267	2.34e-07	4.65	KRT7
206482_at	0.0002504	7.06e-08	4.64	PTK6
212531_at	0.0075448	5.34e-05	4.59	LCN2
231211_s_at	0.0002011	3.31e-08	4.54	YIF1B
223278_at	0.0011318	1.49e-06	4.54	GJB2
209114_at	0.0007451	6.91e-07	4.41	TSPAN1
218963_s_at	0.0074453	5.24e-05	4.41	KRT23
240304_s_at	0.0033501	1.37e-05	4.32	TMC5
210143_at	0.0170772	0.000212	4.32	ANXA10
217109_at	0.0164007	0.000199	4.3	MUC4
239370_at	0.0006964	5.73e-07	4.23	LINC01133
231646_at	0.0431839	0.00118	4.23	DPCR1
227475_at	0.0014886	2.61e-06	4.22	FOXQ1
202831_at	0.01459	0.000166	4.2	GPX2
219404_at	0.0170772	0.000212	4.19	EPS8L3
205513_at	0.0481311	0.0014	4.18	TCN1
219010_at	0.0002504	7.32e-08	4.18	C1orf106
218211_s_at	0.00111	1.36e-06	4.15	MLPH
244056_at	0.0073639	5.16e-05	4.14	SFTA2
209212_s_at	0.0002728	1.05e-07	4.14	KLF5
232164_s_at	0.0009141	9.19e-07	4.08	EPPK1
220468_at	0.0051811	2.74e-05	4.08	ARL14
1552797_s_at	0.000915	9.87e-07	4.07	PROM2
205597_at	0.00206	5.33e-06	4.06	SLC44A4
241994_at	0.0022892	6.82e-06	4.02	XDH
205157_s_at	0.0268806	0.000479	4.01	KRT17
202286_s_at	0.0017638	3.77e-06	3.98	TACSTD2
206023_at	0.012781	0.000129	3.97	NMU
222608_s_at	0.0012258	1.73e-06	3.97	ANLN
218186_at	0.0005568	3.97e-07	3.96	RAB25
228969_at	0.0026291	8.82e-06	3.96	AGR2
201291_s_at	0.0133645	0.000137	3.95	TOP2A
219580_s_at	0.0022201	6.33e-06	3.95	TMC5
228058_at	0.0091133	7.33e-05	3.94	ZG16B
219508_at	0.0076377	5.55e-05	3.93	GCNT3
218796_at	0.0011006	1.28e-06	3.92	FERMT1
204272_at	0.0283938	0.000535	3.84	LGALS4
222904_s_at	0.0014658	2.45e-06	3.83	TMC5
207847_s_at	0.0108386	9.64e-05	3.83	MUC1
91826_at	0.0016641	3.23e-06	3.8	EPS8L1
203021_at	0.0012104	1.68e-06	3.79	SLPI
223484_at	9.03e-05	8.26e-09	3.77	C15orf48
33322_i_at	0.0014886	2.59e-06	3.76	SFN
203559_s_at	0.0354477	0.000823	3.76	AOC1
212992_at	0.0021938	6.02e-06	3.76	AHNAK2
228241_at	0.0136175	0.000143	3.76	AGR3
227725_at	0.002603	8.62e-06	3.75	ST6GALNAC1
203726_s_at	0.0019654	4.67e-06	3.75	LAMA3
202488_s_at	0.0020542	5.21e-06	3.75	FXYD3
229927_at	0.0044634	2.11e-05	3.74	LEMD1
60474_at	0.0010705	1.21e-06	3.71	FERMT1
201467_s_at	0.0063763	3.64e-05	3.69	NQO1
226961_at	0.001255	1.85e-06	3.67	PRR15
203256_at	0.0028073	1.02e-05	3.65	CDH3
1558378_a_at	0.0014868	2.53e-06	3.65	AHNAK2
230323_s_at	0.0180357	0.000239	3.63	TMEM45B
203892_at	0.0019231	4.41e-06	3.61	WFDC2
204678_s_at	0.0014658	2.47e-06	3.6	KCNK1
215125_s_at	0.0343666	0.000775	3.58	UGT1A3
205076_s_at	0.0006905	5.56e-07	3.58	MTMR11
214234_s_at	0.0247748	0.000405	3.57	CYP3A5
210519_s_at	0.0077605	5.69e-05	3.56	NQO1
223949_at	0.00111	1.35e-06	3.55	TMPRSS3
214235_at	0.0242543	0.000387	3.55	CYP3A5
232165_at	0.0026665	9.46e-06	3.54	EPPK1
212236_x_at	0.0180357	0.00024	3.52	KRT17
229964_at	0.0366016	0.000881	3.49	C9orf152
205190_at	0.002603	8.38e-06	3.48	PLS1
41469_at	0.0119684	0.000114	3.47	PI3
209498_at	0.0109235	9.82e-05	3.47	CEACAM1
220177_s_at	0.0013039	2.03e-06	3.46	TMPRSS3
227372_s_at	0.000915	9.45e-07	3.45	BAIAP2L1
201286_at	0.0010609	1.18e-06	3.43	SDC1
205778_at	0.0322796	0.000697	3.43	KLK7
203453_at	0.0071731	4.68e-05	3.39	SCNN1A
219630_at	0.0067273	4e-05	3.39	PDZK1IP1
205455_at	0.0043654	2.02e-05	3.39	MST1R
219476_at	0.002603	8.6e-06	3.35	C1orf116
220030_at	0.0040779	1.8e-05	3.34	STYK1
224650_at	0.0004557	2.83e-07	3.34	MAL2
226213_at	0.0061396	3.43e-05	3.34	ERBB3
240303_at	0.0068118	4.13e-05	3.33	TMC5
227314_at	0.0018777	4.05e-06	3.33	ITGA2
243409_at	0.0080642	6.02e-05	3.32	FOXL1
223232_s_at	0.0008784	8.68e-07	3.32	CGN
239381_at	0.0210657	0.000298	3.31	KLK7
204259_at	0.0331429	0.000729	3.3	MMP7
227676_at	0.0324539	0.000703	3.27	FAM3D
223540_at	0.0007451	6.61e-07	3.26	NECTIN4
205032_at	0.0005182	3.58e-07	3.25	ITGA2
228708_at	0.0029003	1.1e-05	3.23	RAB27B
1553589_a_at	0.0068819	4.25e-05	3.22	PDZK1IP1
239272_at	0.0073219	5.06e-05	3.22	MMP28
219429_at	0.0024556	7.46e-06	3.21	FA2H
228707_at	0.0049007	2.54e-05	3.21	CLDN23
225436_at	0.0007451	6.71e-07	3.21	ABHD17C
206560_s_at	0.0490984	0.00145	3.2	MIA
236979_at	0.0026645	9.41e-06	3.2	BCL2L15
207126_x_at	0.0313274	0.000642	3.19	UGT1A1
210827_s_at	0.0045368	2.2e-05	3.19	ELF3
202454_s_at	0.0063763	3.67e-05	3.15	ERBB3
226226_at	0.0273176	0.000493	3.14	TMEM45B
213693_s_at	0.0098814	8.4e-05	3.14	MUC1
203108_at	0.015766	0.000186	3.14	GPRC5A
203691_at	0.0084767	6.42e-05	3.13	PI3
238439_at	0.0020542	5.12e-06	3.13	ANKRD22
223748_at	0.0033301	1.35e-05	3.12	SLC4A11
218677_at	0.0002995	1.3e-07	3.12	S100A14
238021_s_at	0.0060524	3.35e-05	3.12	CRNDE
228923_at	0.013467	0.000138	3.11	S100A6
215444_s_at	0.0113192	0.000104	3.1	TRIM31
201468_s_at	0.0107335	9.44e-05	3.09	NQO1
235871_at	0.000778	7.54e-07	3.09	LIPH
209211_at	0.001448	2.36e-06	3.09	KLF5
202708_s_at	0.0022201	6.3e-06	3.08	HIST2H2BE
204653_at	0.0105739	9.24e-05	3.07	TFAP2A
232151_at	0.0022115	6.17e-06	3.07	MACC1
227371_at	0.00111	1.4e-06	3.07	BAIAP2L1
239273_s_at	0.0219116	0.000321	3.06	MMP28
225846_at	0.0070216	4.45e-05	3.05	ESRP1
209803_s_at	0.0068819	4.24e-05	3.04	PHLDA2
226185_at	0.0045531	2.23e-05	3.03	CDS1
203824_at	0.0257764	0.000436	3.02	TSPAN8
209911_x_at	0.0075448	5.38e-05	3.02	HIST1H2BD
1558216_at	0.0259171	0.000443	3.02	AFAP1-AS1
232360_at	0.0011854	1.61e-06	3	EHF
224209_s_at	0.0474517	0.00137	2.99	GDA
232361_s_at	0.0004468	2.67e-07	2.99	EHF
209950_s_at	0.0097686	8.2e-05	2.98	VILL
230398_at	0.0146398	0.000168	2.98	TNS4
228232_s_at	0.0148732	0.000172	2.97	VSIG2
229377_at	0.0028379	1.06e-05	2.97	GRTP1
209008_x_at	0.002672	9.53e-06	2.95	KRT8
229538_s_at	0.011282	0.000104	2.95	IQGAP3
232105_at	0.0083007	6.24e-05	2.95	BLACAT1
228865_at	0.0020542	5.26e-06	2.94	C1orf116
226622_at	0.0016163	3.03e-06	2.93	MUC20
242722_at	0.000915	9.74e-07	2.93	LMO7
1566766_a_at	0.0019231	4.45e-06	2.91	MACC1
218779_x_at	0.0073219	5.04e-05	2.9	EPS8L1
228400_at	0.0164007	0.000199	2.88	SHROOM3
231941_s_at	0.0026291	8.88e-06	2.88	MUC20
203876_s_at	0.0353683	0.000816	2.88	MMP11
202597_at	0.0029862	1.16e-05	2.88	IRF6
223779_at	0.0121113	0.000117	2.88	AFAP1-AS1
204641_at	0.0072015	4.79e-05	2.87	NEK2
204990_s_at	0.0011795	1.57e-06	2.87	ITGB4
226129_at	0.0020512	4.95e-06	2.87	FAM83H
225645_at	0.0038955	1.67e-05	2.87	EHF
226803_at	0.001559	2.79e-06	2.87	CHMP4C
208170_s_at	0.0165164	0.000201	2.86	TRIM31
201015_s_at	0.0015708	2.84e-06	2.86	JUP
206515_at	0.0140087	0.000151	2.85	CYP4F3
205709_s_at	0.0063763	3.63e-05	2.84	CDS1
226560_at	0.0251682	0.000418	2.83	SGPP2
211518_s_at	0.0358383	0.000848	2.83	BMP4
218804_at	0.0004249	2.18e-07	2.83	ANO1
213288_at	0.0048512	2.5e-05	2.82	MBOAT2
211002_s_at	0.0179704	0.000233	2.81	TRIM29
204401_at	0.0234156	0.000363	2.8	KCNN4
222549_at	0.0071236	4.63e-05	2.8	CLDN1
226292_at	0.0266437	0.00047	2.8	CAPN5
219918_s_at	0.0367761	0.000888	2.8	ASPM
208190_s_at	0.0048512	2.5e-05	2.79	LSR
204679_at	0.0040172	1.76e-05	2.79	KCNK1
1552477_a_at	0.0043654	2.03e-05	2.78	IRF6
236129_at	0.0392613	0.00101	2.78	GALNT5
35148_at	0.0026291	8.9e-06	2.77	TJP3
219684_at	0.0006144	4.72e-07	2.77	RTP4
223233_s_at	0.0016163	3.02e-06	2.77	CGN
201292_at	0.0330342	0.000724	2.76	TOP2A
221696_s_at	0.0055452	2.97e-05	2.75	STYK1
204073_s_at	0.0241775	0.000383	2.75	MYRF
203287_at	0.0019231	4.32e-06	2.75	LAD1
211184_s_at	0.0209309	0.000295	2.74	USH1C
217744_s_at	0.0058129	3.16e-05	2.74	PERP
204378_at	0.0259812	0.000447	2.74	BCAS1
202525_at	0.0063763	3.67e-05	2.73	PRSS8
37117_at	0.0066153	3.85e-05	2.73	PRR5-ARHGAP8
206043_s_at	0.0263133	0.000459	2.73	ATP2C2
202826_at	0.0016713	3.35e-06	2.72	SPINT1
204818_at	0.0382953	0.000958	2.72	HSD17B2
218644_at	0.0028379	1.04e-05	2.71	PLEK2
203510_at	0.0016713	3.34e-06	2.71	MET
219121_s_at	0.0028379	1.06e-05	2.71	ESRP1
1553105_s_at	0.0167085	0.000205	2.71	DSG2
203407_at	0.0082137	6.16e-05	2.7	PPL
241898_at	0.0022628	6.5e-06	2.7	LIPH
222847_s_at	0.0289554	0.000557	2.7	EGLN3
213668_s_at	0.0010596	1.16e-06	2.69	SOX4
244780_at	0.0355727	0.00083	2.69	SGPP2
226997_at	0.0497022	0.00148	2.69	ADAMTS12
224762_at	0.0028637	1.08e-05	2.68	SERINC2
201287_s_at	0.0020542	5.14e-06	2.68	SDC1
219263_at	0.0372438	0.000913	2.68	RNF128
202503_s_at	0.0261329	0.000453	2.68	KIAA0101
243582_at	0.0320699	0.000683	2.67	SH3RF2
226988_s_at	0.0002728	9.79e-08	2.67	MYH14
201596_x_at	0.0066795	3.94e-05	2.67	KRT18
214070_s_at	0.0360731	0.000862	2.67	ATP10B
225548_at	0.0130493	0.000133	2.66	SHROOM3
227177_at	0.0310674	0.000631	2.66	CORO2A
229163_at	0.0105739	9.22e-05	2.66	CAMK2N1
236083_at	0.0249995	0.000411	2.66	BCL2L15
218451_at	0.0014512	2.39e-06	2.65	CDCP1
209260_at	0.012781	0.000129	2.64	SFN
208300_at	0.0067373	4.02e-05	2.64	PTPRH
233565_s_at	0.0071851	4.76e-05	2.64	FKBP1A-SDCBP2
205980_s_at	0.0093944	7.72e-05	2.63	PRR5-ARHGAP8
205780_at	0.0123809	0.000121	2.63	BIK
204532_x_at	0.0282436	0.00053	2.62	UGT1A1
213078_x_at	0.0170772	0.000212	2.62	LPCAT4
221173_at	0.0315538	0.000662	2.61	USH1C
222067_x_at	0.0239589	0.000379	2.61	HIST1H2BD
1552502_s_at	0.0244111	0.000394	2.6	RHBDL2
218687_s_at	0.0391695	0.001	2.6	MUC13
201839_s_at	0.0347785	0.000788	2.6	EPCAM
203213_at	0.0180357	0.000239	2.6	CDK1
201474_s_at	0.0017638	3.75e-06	2.59	ITGA3
209369_at	0.0022201	6.29e-06	2.58	ANXA3
232530_at	0.0005182	3.39e-07	2.57	PLD1
227452_at	0.0252551	0.000423	2.57	LINC00673
210159_s_at	0.0188915	0.000255	2.56	TRIM31
204825_at	0.0091571	7.39e-05	2.56	MELK
219215_s_at	0.0011854	1.63e-06	2.55	SLC39A4
205660_at	0.0221724	0.00033	2.55	OASL
239196_at	0.0029448	1.14e-05	2.54	ANKRD22
226403_at	0.0144209	0.000162	2.53	TMC4
230518_at	0.0063541	3.6e-05	2.53	MPZL2
204779_s_at	0.0135113	0.000141	2.53	HOXB7
40472_at	0.0109017	9.75e-05	2.52	LPCAT4
202869_at	0.0209813	0.000296	2.51	OAS1
208596_s_at	0.0261329	0.000451	2.5	UGT1A3
205137_x_at	0.0294827	0.000574	2.49	USH1C
229842_at	0.036051	0.000859	2.49	ELF3
227753_at	0.0073219	5.01e-05	2.48	TMEM139
210608_s_at	0.0047465	2.43e-05	2.48	FUT2
209679_s_at	0.0104007	9e-05	2.46	SMAGP
221884_at	0.0123918	0.000122	2.46	MECOM
218542_at	0.0116108	0.000109	2.46	CEP55
227272_at	0.0047374	2.38e-05	2.46	C15orf52
227196_at	0.0016713	3.38e-06	2.45	RHPN2
202954_at	0.0135113	0.00014	2.44	UBE2C
219360_s_at	0.0024732	7.6e-06	2.44	TRPM4
213412_at	0.0026645	9.39e-06	2.44	TJP3
219127_at	0.0314797	0.000659	2.44	PRR15L
241763_s_at	0.0095169	7.87e-05	2.44	FBXO32
207828_s_at	0.027127	0.000485	2.44	CENPF
1562440_at	0.0021533	5.79e-06	2.43	MAP3K13
218280_x_at	0.0087552	6.86e-05	2.43	HIST2H2AA4
202935_s_at	0.0192543	0.000262	2.42	SOX9
214088_s_at	0.001255	1.86e-06	2.42	FUT3
222853_at	0.0137031	0.000144	2.42	FLRT3
206994_at	0.0095937	8.02e-05	2.42	CST4
220638_s_at	0.0118899	0.000113	2.42	CBLC
215243_s_at	0.0040877	1.82e-05	2.41	GJB3
202528_at	0.0073475	5.13e-05	2.41	GALE
201890_at	0.0358383	0.000845	2.4	RRM2
1554897_s_at	0.0253856	0.000429	2.4	RHBDL2
219787_s_at	0.0097686	8.2e-05	2.4	ECT2
212925_at	0.0086954	6.77e-05	2.39	MISP
232202_at	0.0164007	0.000199	2.39	FAM83B
204856_at	0.0063763	3.67e-05	2.39	B3GNT3
1552619_a_at	0.0353205	0.000813	2.39	ANLN
242013_at	0.008521	6.55e-05	2.38	BCL2L15
229254_at	0.0218487	0.000319	2.37	MFSD4A
229369_at	0.0421383	0.00114	2.36	VSIG2
235144_at	0.0397664	0.00102	2.36	RASEF
209035_at	0.0044634	2.1e-05	2.35	MDK
218585_s_at	0.0161756	0.000193	2.35	DTL
238022_at	0.0277006	0.000511	2.35	CRNDE
201416_at	5.29e-05	1.71e-09	2.34	SOX4
219395_at	0.0285095	0.000541	2.34	MIR6773
218849_s_at	0.0079049	5.84e-05	2.33	PPP1R13L
227614_at	0.0473872	0.00136	2.33	HKDC1
217901_at	0.0153377	0.000179	2.33	DSG2
241762_at	0.0215962	0.000312	2.32	FBXO32
213929_at	0.0137504	0.000146	2.32	EXPH5
201510_at	0.0355997	0.000833	2.31	ELF3
214073_at	0.0234156	0.000362	2.31	CTTN
202790_at	0.0135113	0.000141	2.31	CLDN7
204026_s_at	0.0110719	0.0001	2.3	ZWINT
215071_s_at	0.0102152	8.82e-05	2.3	HIST1H2AC
213425_at	0.0073219	4.98e-05	2.29	WNT5A
223948_s_at	0.0047088	2.35e-05	2.29	TMPRSS3
235651_at	0.0070395	4.51e-05	2.28	TTC22
209529_at	0.0263133	0.000459	2.27	PLPP2
225314_at	0.0019231	4.29e-06	2.27	OCIAD2
65517_at	0.0019231	4.47e-06	2.27	AP1M2
205490_x_at	0.0070906	4.59e-05	2.26	GJB3
221655_x_at	0.0221411	0.000329	2.26	EPS8L1
1553768_a_at	0.0109235	9.83e-05	2.26	DCBLD1
218261_at	0.002603	8.29e-06	2.26	AP1M2
238513_at	0.0036739	1.54e-05	2.25	PRRG4
207517_at	0.0038994	1.7e-05	2.25	LAMC2
203397_s_at	0.0070216	4.48e-05	2.25	GALNT3
216836_s_at	0.0036739	1.53e-05	2.25	ERBB2
213008_at	0.0209991	0.000297	2.24	FANCI
215066_at	0.0073219	4.95e-05	2.23	PTPRF
204702_s_at	0.0080839	6.05e-05	2.23	NFE2L3
228323_at	0.0401248	0.00104	2.22	KNL1
213506_at	0.0120203	0.000115	2.22	F2RL1
214290_s_at	0.0153048	0.000178	2.21	HIST2H2AA4
221879_at	0.0256441	0.000433	2.21	CALML4
201242_s_at	0.0310674	0.000633	2.21	ATP1B1
212022_s_at	0.0371169	0.000905	2.2	MKI67
209691_s_at	0.0090348	7.2e-05	2.2	DOK4
209160_at	0.0375896	0.000928	2.2	AKR1C3
205990_s_at	0.0144209	0.000162	2.19	WNT5A
222392_x_at	0.0035875	1.48e-05	2.19	PERP
230206_at	0.0014886	2.61e-06	2.19	DOCK5
210791_s_at	0.0019987	4.79e-06	2.19	ARHGAP32
219901_at	0.001255	1.84e-06	2.18	FGD6
221911_at	0.0314797	0.000648	2.18	ETV1
201340_s_at	0.002271	6.73e-06	2.18	ENC1
223229_at	0.0173495	0.000218	2.17	UBE2T
230660_at	0.02304	0.00035	2.17	SERTAD4
202145_at	0.0156774	0.000185	2.16	LY6E
205640_at	0.0006144	4.64e-07	2.16	ALDH3B1
225536_at	0.0098814	8.37e-05	2.15	TMEM54
209921_at	0.036051	0.000857	2.15	SLC7A11
239609_s_at	0.022546	0.000338	2.15	LPCAT4
238673_at	0.0066352	3.87e-05	2.14	SAMD12
227556_at	0.0249437	0.000409	2.14	NME7
235141_at	0.0313424	0.000643	2.14	MARVELD2
229105_at	0.0070906	4.59e-05	2.14	GPR39
219250_s_at	0.0073219	4.9e-05	2.14	FLRT3
205807_s_at	0.0011281	1.46e-06	2.13	TUFT1
226420_at	0.0307637	0.000618	2.13	MECOM
209373_at	0.0411187	0.00109	2.13	MALL
211465_x_at	0.0029003	1.1e-05	2.13	FUT6
229545_at	0.0204231	0.000286	2.13	FERMT1
208711_s_at	0.002603	8.59e-06	2.13	CCND1
227955_s_at	0.0399515	0.00103	2.12	EFNA5
203431_s_at	0.0024847	7.68e-06	2.12	ARHGAP32
207169_x_at	0.0244512	0.000396	2.11	MIR4640
222773_s_at	0.0073219	5.04e-05	2.11	GALNT12
226726_at	0.0046766	2.33e-05	2.1	MBOAT2
202411_at	0.0144464	0.000163	2.1	IFI27
221665_s_at	0.0241775	0.000384	2.1	EPS8L1
228696_at	0.0463527	0.00132	2.09	SLC45A3
228904_at	0.0113736	0.000105	2.08	HOXB3
218309_at	0.0238918	0.000376	2.08	CAMK2N1
220658_s_at	0.031948	0.000677	2.08	ARNTL2
208161_s_at	0.036051	0.00086	2.07	ABCC3
206600_s_at	0.002271	6.59e-06	2.06	SLC16A5
222456_s_at	0.009099	7.31e-05	2.06	LIMA1
218009_s_at	0.0331429	0.000729	2.04	PRC1
219959_at	0.0367625	0.000886	2.04	MOCOS
226799_at	0.0017064	3.5e-06	2.03	FGD6
230682_x_at	0.040673	0.00107	2.02	ABCC3
238567_at	0.0356759	0.000838	2.01	SGPP2
210749_x_at	0.0310674	0.000633	2.01	MIR4640
202023_at	0.0095937	7.99e-05	2.01	EFNA1
201428_at	0.0098814	8.4e-05	2	CLDN4
214898_x_at	0.0232811	0.000357	1.99	MUC3B
201131_s_at	0.0059962	3.3e-05	1.99	CDH1
218657_at	0.0252692	0.000424	1.98	RAPGEFL1
232762_at	0.0089575	7.07e-05	1.98	KIAA1217
90265_at	0.0335702	0.000745	1.98	ADAP1
1555326_a_at	0.0144209	0.000162	1.98	ADAM9
205552_s_at	0.0457864	0.00129	1.97	OAS1
208886_at	0.0022115	6.13e-06	1.97	H1F0
206102_at	0.0261625	0.000454	1.97	GINS1
218182_s_at	0.0216886	0.000316	1.97	CLDN1
210715_s_at	0.0016624	3.16e-06	1.96	SPINT2
215177_s_at	0.0123918	0.000122	1.96	ITGA6
238028_at	0.0213897	0.000306	1.96	C6orf132
220189_s_at	0.0080061	5.96e-05	1.95	MGAT4B
216973_s_at	0.0364123	0.000875	1.95	HOXB7
64408_s_at	0.0398793	0.00103	1.95	CALML4
240770_at	0.0394427	0.00101	1.94	TMEM171
211026_s_at	0.0344067	0.000777	1.94	MGLL
218180_s_at	0.0196711	0.000273	1.94	EPS8L2
224204_x_at	0.0300739	0.000592	1.94	ARNTL2
222750_s_at	0.0190941	0.000259	1.93	SRD5A3
204778_x_at	0.0314797	0.000649	1.93	HOXB7
231835_at	0.0252551	0.000423	1.93	FAM213B
219411_at	0.014039	0.000152	1.93	ELMO3
225320_at	0.0163506	0.000196	1.92	MCU
221256_s_at	0.0289554	0.000554	1.92	HDHD3
202669_s_at	0.0114824	0.000106	1.92	EFNB2
204136_at	0.0164007	0.000197	1.92	COL7A1
224598_at	0.0060524	3.35e-05	1.91	MGAT4B
242881_x_at	0.0226129	0.000339	1.91	DUXAP10
235165_at	0.01185	0.000112	1.9	PARD6B
225301_s_at	0.0371169	0.000904	1.9	MYO5B
232977_x_at	0.0068118	4.16e-05	1.9	MYH14
232046_at	0.0091826	7.46e-05	1.9	KIAA1217
219513_s_at	0.019433	0.000268	1.89	SH2D3A
213590_at	0.0020542	5.18e-06	1.88	SLC16A5
209596_at	0.0379712	0.000942	1.88	MXRA5
202674_s_at	0.0314797	0.000653	1.88	LMO7
203713_s_at	0.012144	0.000118	1.88	LLGL2
225803_at	0.0176426	0.000226	1.88	FBXO32
223249_at	0.0140087	0.000151	1.88	CLDN12
218755_at	0.0459804	0.00131	1.87	KIF20A
201188_s_at	0.0355997	0.000834	1.87	ITPR3
221215_s_at	0.0445459	0.00124	1.86	RIPK4
201189_s_at	0.0252692	0.000425	1.86	ITPR3
213007_at	0.0411187	0.00109	1.86	FANCI
222675_s_at	0.0069313	4.34e-05	1.86	BAIAP2L1
217419_x_at	0.0213166	0.000303	1.86	AGRN
1556034_s_at	0.0061949	3.48e-05	1.85	MTMR11
1007_s_at	0.0284651	0.000538	1.85	MIR4640
210399_x_at	0.0076293	5.5e-05	1.85	FUT6
216905_s_at	0.0072551	4.84e-05	1.84	ST14
226456_at	0.0269408	0.000481	1.84	RMI2
210026_s_at	0.0494165	0.00147	1.84	CARD10
201243_s_at	0.0229415	0.000347	1.84	ATP1B1
205968_at	0.0337925	0.000752	1.83	KCNS3
235148_at	0.0226375	0.00034	1.82	KRTCAP3
223586_at	0.0310674	0.000633	1.82	ARNTL2
212285_s_at	0.022521	0.000337	1.82	AGRN
235955_at	0.0358468	0.00085	1.81	MARVELD2
1555137_a_at	0.0069313	4.35e-05	1.81	FGD6
218686_s_at	0.0036739	1.55e-05	1.79	RHBDF1
205483_s_at	0.0163506	0.000196	1.79	ISG15
201904_s_at	0.0076377	5.54e-05	1.79	CTDSPL
227492_at	0.0146398	0.000167	1.78	OCLN
240735_at	0.0180357	0.00024	1.78	CDC42BPA
220520_s_at	0.0386649	0.000977	1.77	NUP62CL
218885_s_at	0.0144994	0.000165	1.77	GALNT12
214074_s_at	0.0069802	4.39e-05	1.77	CTTN
219749_at	0.0194034	0.000266	1.76	SH2D4A
225150_s_at	0.0301	0.000593	1.76	RTKN
216222_s_at	0.0084146	6.34e-05	1.76	MYO10
208613_s_at	0.0108032	9.53e-05	1.76	FLNB
212339_at	0.041771	0.00112	1.76	EPB41L1
203585_at	0.0130123	0.000133	1.75	ZNF185
231832_at	0.0499926	0.0015	1.75	POC1B-GALNT4
235110_at	0.0314797	0.000659	1.75	PLA2G16
209873_s_at	0.0268222	0.000476	1.75	PKP3
218856_at	0.0089774	7.13e-05	1.74	TNFRSF21
235583_at	0.0258692	0.000438	1.74	ILDR1
229648_at	0.0310125	0.000628	1.74	ARHGAP32
209605_at	0.0251682	0.000418	1.73	TST
214581_x_at	0.0487657	0.00143	1.73	TNFRSF21
236094_at	0.0108309	9.61e-05	1.73	TCF7L2
242546_at	0.0322796	0.000696	1.73	LINC01296
237159_x_at	0.0390521	0.000992	1.73	AP1S3
214833_at	0.0116003	0.000109	1.72	TMEM63A
204927_at	0.0329487	0.000719	1.72	RASSF7
236616_at	0.0203725	0.000285	1.72	PSD4
211778_s_at	0.0411187	0.00109	1.72	OVOL2
238593_at	0.0047465	2.42e-05	1.72	C11orf80
201830_s_at	0.0016641	3.22e-06	1.71	NET1
201579_at	0.0041557	1.88e-05	1.71	FAT1
212336_at	0.0313069	0.00064	1.71	EPB41L1
227334_at	0.0179704	0.000234	1.7	USP54
1553099_at	0.0108309	9.59e-05	1.7	TIGD1
228892_at	0.0355727	0.00083	1.7	SH3RF2
200635_s_at	0.0057965	3.14e-05	1.7	PTPRF
217755_at	0.0322796	0.000695	1.7	HN1
202005_at	0.0024661	7.53e-06	1.69	ST14
236471_at	0.0333912	0.000737	1.68	NFE2L3
242979_at	0.0284651	0.000538	1.68	IRS1
214734_at	0.0261329	0.000453	1.68	EXPH5
230263_s_at	0.0021938	5.96e-06	1.68	DOCK5
242196_at	0.0139381	0.000149	1.68	ARHGAP32
227998_at	0.0086713	6.73e-05	1.67	S100A16
236513_at	0.0173383	0.000217	1.67	PRELID2
242417_at	0.0467428	0.00134	1.67	PLEKHA7
219946_x_at	0.0068897	4.28e-05	1.67	MYH14
228236_at	0.0314797	0.000652	1.66	SLC52A3
203215_s_at	0.0068118	4.11e-05	1.66	MYO6
208779_x_at	0.0397698	0.00103	1.66	MIR4640
216641_s_at	0.0173495	0.000219	1.66	LAD1
219722_s_at	0.0277302	0.000512	1.66	GDPD3
221927_s_at	0.0087552	6.86e-05	1.66	ABHD11
202129_s_at	0.0085038	6.5e-05	1.65	RIOK3
1553114_a_at	0.0436602	0.0012	1.65	PTK6
230424_at	0.0247553	0.000403	1.65	NREP
224746_at	0.0261329	0.000451	1.65	KIAA1522
218412_s_at	0.0029107	1.12e-05	1.65	GTF2IRD1
212070_at	0.0212139	0.000301	1.65	ADGRG1
221024_s_at	0.0350446	0.000798	1.64	SLC2A10
211004_s_at	0.0070679	4.54e-05	1.64	ALDH3B1
229997_at	0.00111	1.35e-06	1.63	VANGL1
205016_at	0.0017469	3.67e-06	1.63	TGFA
243444_at	0.0059112	3.22e-05	1.63	SRD5A3
201418_s_at	0.0037041	1.57e-05	1.63	SOX4
201562_s_at	0.0028379	1.06e-05	1.63	SORD
239155_at	0.0490766	0.00145	1.62	CXADR
201850_at	0.0386414	0.000975	1.62	CAPG
218693_at	0.0146398	0.000168	1.61	TSPAN15
201341_at	0.0177138	0.000229	1.61	ENC1
208712_at	0.0118134	0.000111	1.61	CCND1
234725_s_at	0.0183601	0.000246	1.6	SEMA4B
207076_s_at	0.0277828	0.000516	1.6	ASS1
201563_at	0.0085038	6.5e-05	1.59	SORD
229396_at	0.0469413	0.00135	1.59	OVOL1
204765_at	0.0214401	0.000307	1.59	ARHGEF5
202949_s_at	0.0140029	0.00015	1.58	FHL2
214355_x_at	0.0277506	0.000514	1.58	CTAGE8
211574_s_at	0.0004468	2.59e-07	1.58	CD46
210480_s_at	0.0268806	0.000479	1.57	MYO6
222587_s_at	0.0125929	0.000126	1.56	GALNT7
239010_at	0.0367625	0.000887	1.56	DUXAP10
230207_s_at	0.0040864	1.81e-05	1.56	DOCK5
1554438_at	0.006583	3.82e-05	1.55	KIAA1217
221610_s_at	0.0090718	7.27e-05	1.54	STAP2
217875_s_at	0.0496078	0.00148	1.54	PMEPA1
214464_at	0.0068897	4.28e-05	1.54	CDC42BPA
201310_s_at	0.0212139	0.000301	1.53	NREP
234290_x_at	0.0259171	0.000441	1.53	MYH14
219332_at	0.0385411	0.000969	1.53	MICALL2
214782_at	0.0075952	5.45e-05	1.53	CTTN
213230_at	0.0499926	0.0015	1.53	CDR2L
221815_at	0.0419161	0.00113	1.53	ABHD2
209262_s_at	0.0441697	0.00122	1.52	NR2F6
203917_at	0.0400482	0.00104	1.52	CXADR
226455_at	0.0272611	0.000489	1.52	CREB3L4
222721_at	0.0119011	0.000114	1.52	CNIH4
226187_at	0.0377394	0.000935	1.52	CDS1
205339_at	0.0180357	0.00024	1.51	STIL
241812_at	0.0135113	0.00014	1.51	SPATS2L
39549_at	0.0272611	0.00049	1.51	NPAS2
226552_at	0.0164007	0.000198	1.51	IER5L
238049_at	0.0068118	4.12e-05	1.51	GRAMD3
219916_s_at	0.0450942	0.00127	1.5	RNF39
202421_at	0.012144	0.000118	1.5	IGSF3
201417_at	0.0026927	9.65e-06	1.49	SOX4
239433_at	0.0413877	0.00111	1.49	LRRC8E
213235_at	0.0023145	6.94e-06	1.49	KNOP1
201548_s_at	0.0006221	4.89e-07	1.49	KDM5B
207265_s_at	0.0417435	0.00112	1.49	KDELR3
34726_at	0.0028379	1.04e-05	1.49	CACNB3
209678_s_at	0.0016713	3.39e-06	1.48	PRKCI
205366_s_at	0.03265	0.000711	1.48	HOXB6
207606_s_at	0.0303105	0.000599	1.48	ARHGAP12
51192_at	0.0160211	0.00019	1.47	SSH3
201481_s_at	0.0314797	0.000652	1.47	PYGB
203370_s_at	0.0489162	0.00144	1.47	PDLIM7
226707_at	0.0499882	0.00149	1.47	NAPRT
210253_at	0.0189552	0.000257	1.47	HTATIP2
206414_s_at	0.0052525	2.79e-05	1.47	ASAP2
221843_s_at	0.0259171	0.000446	1.46	TLDC1
217728_at	0.0043654	2.02e-05	1.46	S100A6
218816_at	0.0129937	0.000132	1.46	LRRC1
226324_s_at	0.0073475	5.12e-05	1.46	IFT172
1555136_at	0.0109209	9.79e-05	1.46	FGD6
219439_at	0.0244512	0.000396	1.46	C1GALT1
226609_at	0.0247553	0.000403	1.45	DCBLD1
210830_s_at	0.0046014	2.28e-05	1.44	PON2
218400_at	0.0391695	0.001	1.44	OAS3
201829_at	0.0017231	3.56e-06	1.44	NET1
225864_at	0.0051811	2.74e-05	1.44	FAM84B
227046_at	0.0051636	2.71e-05	1.43	SLC39A11
202668_at	0.0164007	0.000199	1.43	EFNB2
212611_at	0.0277506	0.000515	1.43	DTX4
213272_s_at	0.0049771	2.6e-05	1.42	TMEM159
65438_at	0.0273235	0.000495	1.42	TLDC1
227431_at	0.0181164	0.000243	1.42	APTR
229887_at	0.0266704	0.000471	1.42	ALS2CL
207180_s_at	0.0332566	0.000732	1.41	HTATIP2
242649_x_at	0.0180357	0.000236	1.41	HMGN2P46
223000_s_at	0.0007451	6.29e-07	1.41	F11R
217208_s_at	0.0140889	0.000154	1.41	DLG1
202687_s_at	0.0118899	0.000113	1.4	TNFSF10
201825_s_at	0.0364316	0.000876	1.4	SCCPDH
200636_s_at	0.027399	0.0005	1.4	PTPRF
218454_at	0.00907	7.25e-05	1.4	PLBD1
229553_at	0.0075448	5.38e-05	1.4	PGM2L1
1558738_at	0.0322796	0.000696	1.4	NOL3
225750_at	0.0160945	0.000191	1.4	ERO1A
226899_at	0.040209	0.00105	1.39	UNC5B
36936_at	0.0458719	0.0013	1.39	TSTA3
202071_at	0.0252551	0.000423	1.39	SDC4
207291_at	0.0044634	2.11e-05	1.39	PRRG4
213462_at	0.028118	0.000527	1.39	NPAS2
219024_at	0.0036455	1.51e-05	1.38	PLEKHA1
201976_s_at	0.0275307	0.000506	1.38	MYO10
210220_at	0.0372438	0.000914	1.38	FZD2
242234_at	0.0352393	0.000809	1.37	XAF1
201656_at	0.0194031	0.000265	1.37	ITGA6
221794_at	0.0076455	5.57e-05	1.37	DOCK6
1553764_a_at	0.0360716	0.000861	1.37	AJUBA
214375_at	0.0387248	0.00098	1.36	PPFIBP1
226485_at	0.0253334	0.000427	1.36	LOC101928274
200923_at	0.0123918	0.000123	1.36	LGALS3BP
205601_s_at	0.0073219	4.94e-05	1.36	HOXB5
232017_at	0.033553	0.000742	1.35	TJP2
218800_at	0.0358383	0.000849	1.35	SRD5A3
224595_at	0.0089575	7.08e-05	1.35	SLC44A1
200660_at	0.0076293	5.49e-05	1.35	S100A11
225009_at	0.0297619	0.000581	1.35	CMTM4
205308_at	0.0025624	8.01e-06	1.34	ZC2HC1A
1558356_at	0.0285074	0.00054	1.34	UACA
214329_x_at	0.02201	0.000324	1.34	TNFSF10
220021_at	0.0377058	0.000934	1.34	TMC7
204669_s_at	0.030426	0.000602	1.34	RNF24
224097_s_at	0.002271	6.68e-06	1.34	F11R
226507_at	0.0277506	0.000515	1.33	PAK1
1554609_at	0.0451772	0.00127	1.33	LOC100287896
221664_s_at	0.0037353	1.59e-05	1.33	F11R
204608_at	0.0277302	0.000513	1.33	ASL
219919_s_at	0.0273472	0.000497	1.32	SSH3
205406_s_at	0.0180375	0.000241	1.32	SPA17
201251_at	0.0403636	0.00105	1.32	PKM
1555842_at	0.0355727	0.000829	1.32	CYTH2
207549_x_at	0.0004468	2.7e-07	1.32	CD46
202381_at	0.0094716	7.81e-05	1.32	ADAM9
202740_at	0.0458699	0.0013	1.32	ABHD14A-ACY1
210609_s_at	0.0288688	0.000552	1.31	TP53I3
202786_at	0.0105739	9.25e-05	1.31	STK39
224596_at	0.0141464	0.000155	1.31	SLC44A1
228450_at	0.0071851	4.73e-05	1.31	PLEKHA7
222396_at	0.0236263	0.000366	1.31	HN1
222810_s_at	0.0201577	0.000281	1.3	RASAL2
225177_at	0.0156774	0.000184	1.3	RAB11FIP1
226697_at	0.0091995	7.5e-05	1.29	FAM114A1
237411_at	0.0419523	0.00113	1.29	ADAMTS6
219330_at	0.0091729	7.43e-05	1.28	VANGL1
210706_s_at	0.0251074	0.000416	1.28	RNF24
209635_at	0.0266312	0.000469	1.28	AP1S1
235927_at	0.0226869	0.000342	1.27	XPO1
209448_at	0.0099214	8.47e-05	1.27	HTATIP2
210813_s_at	0.0495089	0.00147	1.26	XRCC4
202096_s_at	0.02201	0.000324	1.26	TSPO
218826_at	0.0350454	0.000801	1.26	SLC35F2
214483_s_at	0.0310674	0.000632	1.26	ARFIP1
212762_s_at	0.0481092	0.0014	1.25	TCF7L2
218900_at	0.0391135	0.000997	1.25	CNNM4
201927_s_at	0.0314038	0.000646	1.24	PKP4
212473_s_at	0.0268806	0.000479	1.24	MICAL2
238715_at	0.0288165	0.000549	1.24	LOC646014
208949_s_at	0.0041557	1.88e-05	1.24	LGALS3
201876_at	0.0045368	2.2e-05	1.23	PON2
216243_s_at	0.0412402	0.0011	1.23	IL1RN
207525_s_at	0.0074365	5.22e-05	1.23	GIPC1
205107_s_at	0.0342116	0.000769	1.23	EFNA4
201059_at	0.0026354	9.01e-06	1.23	CTTN
214435_x_at	0.0022115	6.19e-06	1.22	RALA
231807_at	0.0420814	0.00114	1.22	KIAA1217
202894_at	0.0371169	0.000903	1.22	EPHB4
201906_s_at	0.0354339	0.000822	1.22	CTDSPL
224623_at	0.0324763	0.000704	1.21	LOC728554
223452_s_at	0.0337925	0.000753	1.21	ATL3
223078_s_at	0.0177939	0.00023	1.19	TMOD3
222154_s_at	0.0061396	3.44e-05	1.19	SPATS2L
207705_s_at	0.0289554	0.000556	1.19	NINL
203216_s_at	0.0371621	0.000908	1.19	MYO6
210150_s_at	0.0410062	0.00109	1.19	LAMA5
226706_at	0.0307313	0.000615	1.19	FLJ23867
202604_x_at	0.0110762	0.000101	1.19	ADAM10
218788_s_at	0.0341021	0.000762	1.18	SMYD3
200885_at	0.0272611	0.00049	1.18	RHOC
218313_s_at	0.0314797	0.000655	1.18	GALNT7
243618_s_at	0.0487657	0.00143	1.17	ZNF827
214168_s_at	0.0054262	2.9e-05	1.17	TJP1
206949_s_at	0.0237987	0.000371	1.17	RUSC1
214697_s_at	0.0450241	0.00126	1.17	PTBP3
202239_at	0.0086284	6.64e-05	1.17	PARP4
229097_at	0.0347292	0.000786	1.17	DIAPH3
229492_at	0.0108032	9.54e-05	1.16	VANGL1
235152_at	0.0174172	0.000221	1.16	LOC101927204
1553530_a_at	0.0361671	0.000865	1.16	ITGB1
212876_at	0.01677	0.000206	1.16	B4GALT4
214374_s_at	0.0108386	9.65e-05	1.15	PPFIBP1
202516_s_at	0.0341842	0.000766	1.15	DLG1
222819_at	0.0313812	0.000645	1.15	CTPS2
227960_s_at	0.0138289	0.000147	1.14	FAHD1
213365_at	0.0282821	0.000532	1.14	ERI2
226637_at	0.0115914	0.000108	1.13	UBE2H
208407_s_at	0.0045033	2.16e-05	1.12	TMX2-CTNND1
203228_at	0.0062181	3.5e-05	1.12	PAFAH1B3
201201_at	0.0362227	0.000868	1.12	CSTB
210540_s_at	0.0277302	0.000512	1.12	B4GALT4
223382_s_at	0.0288688	0.000552	1.11	ZNRF1
225412_at	0.004202	1.92e-05	1.11	TMEM87B
223363_at	0.0324516	0.000702	1.11	PSMG3
230229_at	0.0207506	0.000291	1.11	DLG1
201633_s_at	0.0141573	0.000157	1.11	CYB5B
202440_s_at	0.0055717	3e-05	1.1	ST5
225467_s_at	0.0283938	0.000534	1.1	RDH13
225278_at	0.0263457	0.000461	1.1	PRKAB2
225224_at	0.0244512	0.000397	1.1	NOL4L
215017_s_at	0.0385673	0.000972	1.1	FNBP1L
226287_at	0.0392613	0.00101	1.1	CCDC34
213503_x_at	0.0026354	8.99e-06	1.1	ANXA2
218815_s_at	0.0147117	0.000169	1.09	TMEM51
1556009_at	0.0354197	0.000819	1.09	PEX13
223849_s_at	0.0329487	0.000719	1.09	MOV10
225325_at	0.028714	0.000546	1.09	MFSD6
201549_x_at	0.0174172	0.000221	1.09	KDM5B
201193_at	0.0242543	0.000388	1.09	IDH1
210427_x_at	0.0028379	1.05e-05	1.09	ANXA2
213518_at	0.0350446	0.000799	1.08	PRKCI
208890_s_at	0.0220388	0.000326	1.08	PLXNB2
209222_s_at	0.0234156	0.000362	1.08	OSBPL2
210087_s_at	0.0457864	0.00129	1.08	MPZL1
228437_at	0.008521	6.53e-05	1.08	CNIH4
201590_x_at	0.002603	8.59e-06	1.08	ANXA2
222600_s_at	0.0489757	0.00144	1.07	UBA6
200872_at	0.0358383	0.000848	1.07	S100A10
215903_s_at	0.0179704	0.000233	1.07	MAST2
214352_s_at	0.0143225	0.000159	1.07	KRAS
201681_s_at	0.0267263	0.000474	1.07	DLG5
217140_s_at	0.0174657	0.000222	1.06	VDAC1
232961_at	0.0407665	0.00108	1.06	SPATS2L
211043_s_at	0.030735	0.000617	1.06	CLTB
202185_at	0.02201	0.000324	1.05	PLOD3
55583_at	0.0086713	6.74e-05	1.05	DOCK6
218077_s_at	0.0350232	0.000797	1.04	ZDHHC3
209403_at	0.0411187	0.00109	1.04	TBC1D3I
1567458_s_at	0.0357095	0.000839	1.04	RAC1
226767_s_at	0.0068118	4.14e-05	1.04	FAHD1
213893_x_at	0.0152078	0.000177	1.03	PMS2P9
218942_at	0.0288221	0.000549	1.03	PIP4K2C
211202_s_at	0.0309034	0.000624	1.03	KDM5B
204034_at	0.0444119	0.00123	1.03	ETHE1
209048_s_at	0.0458678	0.0013	1.02	ZMYND8
222387_s_at	0.0403636	0.00105	1.02	VPS35
203236_s_at	0.0177116	0.000228	1.02	LGALS9
200824_at	0.0262039	0.000455	1.02	GSTP1
220800_s_at	0.0242543	0.000388	1.01	TMOD3
222647_at	0.0397664	0.00102	1.01	SLC35C1
213571_s_at	0.0002504	6.11e-08	1.01	EIF4E2
244251_at	0.0173358	0.000217	-1.01	LCP2
227439_at	0.0314797	0.000654	-1.01	ANKS1B
239042_at	0.0073219	4.96e-05	-1.02	TSR1
1569482_at	0.0487657	0.00143	-1.03	TNRC6C
226573_at	0.0068316	4.2e-05	-1.03	DIRAS1
213715_s_at	0.0304709	0.000604	-1.04	KANK3
209789_at	0.0141464	0.000156	-1.04	CORO2B
204184_s_at	0.0261065	0.00045	-1.05	GRK3
231031_at	0.0408763	0.00108	-1.05	FGF7P3
229452_at	0.0073219	5.08e-05	-1.06	TMEM88
232629_at	0.0403853	0.00105	-1.06	PROK2
229687_s_at	0.0482026	0.00141	-1.06	PRDM11
1569484_s_at	0.00928	7.59e-05	-1.06	MDN1
217833_at	0.0110762	0.000101	-1.08	SYNCRIP
239427_at	0.0487841	0.00144	-1.08	SLAMF1
210676_x_at	0.0341051	0.000763	-1.08	RGPD6
218305_at	0.0124044	0.000124	-1.08	IPO4
220117_at	0.0251016	0.000414	-1.09	ZNF385D
213236_at	0.0391933	0.001	-1.09	SASH1
32625_at	0.031948	0.000677	-1.1	NPR1
214153_at	0.0369242	0.000895	-1.1	ELOVL5
229121_at	0.0073219	5.03e-05	-1.1	CMKLR1
209307_at	0.0383115	0.00096	-1.11	SWAP70
218032_at	0.0364123	0.000875	-1.11	SNN
229407_at	0.0019231	4.35e-06	-1.12	SDK1
36829_at	0.0405752	0.00106	-1.12	MIR6883
214805_at	0.0236571	0.000367	-1.13	SNORD10
224450_s_at	0.039675	0.00102	-1.13	RIOK1
205813_s_at	0.038833	0.000984	-1.13	MAT1A
235359_at	0.0445059	0.00124	-1.14	NRROS
227993_at	0.021514	0.000309	-1.14	METAP2
244025_at	0.0242543	0.000388	-1.14	ITPRIP
213515_x_at	0.0259171	0.000445	-1.14	HBG2
205839_s_at	0.0151299	0.000176	-1.15	TSPOAP1
219448_at	0.0073475	5.13e-05	-1.15	TMEM70
233952_s_at	0.0285074	0.00054	-1.16	ZBTB21
223504_at	0.0193824	0.000264	-1.16	DNAJC27
201963_at	0.0477459	0.00138	-1.16	ACSL1
225539_at	0.0194236	0.000267	-1.17	ZBTB21
238624_at	0.0036739	1.55e-05	-1.17	LOC102724517
220370_s_at	0.0166459	0.000204	-1.19	USP36
240806_at	0.0020542	5.13e-06	-1.19	RPL15
238600_at	0.0319009	0.000674	-1.19	JAKMIP1
218012_at	0.0040779	1.8e-05	-1.2	TSPYL2
225570_at	0.0137504	0.000145	-1.2	SLC41A1
205858_at	0.0477792	0.00138	-1.2	NGFR
231907_at	0.0120209	0.000116	-1.2	ABL2
233057_at	0.0477792	0.00138	-1.21	HSPB8
210152_at	0.0238061	0.000372	-1.22	LILRB4
206896_s_at	0.0354339	0.000822	-1.22	GNG7
204753_s_at	0.0316971	0.000668	-1.23	HLF
209193_at	0.0367625	0.000887	-1.25	PIM1
226370_at	0.0026645	9.34e-06	-1.26	KLHL15
1552711_a_at	0.0019231	4.43e-06	-1.26	CYB5D1
223960_s_at	0.0490984	0.00145	-1.26	CDIP1
208056_s_at	0.0321729	0.000688	-1.26	CBFA2T3
226694_at	0.0251692	0.000419	-1.27	PALM2-AKAP2
202861_at	0.0297394	0.00058	-1.27	MIR6883
220358_at	0.0493953	0.00147	-1.28	BATF3
205027_s_at	0.0390785	0.000995	-1.29	MAP3K8
209681_at	0.0405468	0.00106	-1.3	SLC19A2
200790_at	0.0084841	6.44e-05	-1.3	ODC1
206380_s_at	0.0213897	0.000305	-1.31	CFP
236621_at	0.0193784	0.000264	-1.32	RPS27
41387_r_at	0.000383	1.89e-07	-1.32	KDM6B
212196_at	0.0035026	1.44e-05	-1.32	IL6ST
239648_at	0.0252195	0.000421	-1.32	DCUN1D3
1554182_at	0.0463857	0.00132	-1.35	TRIM74
207075_at	0.013467	0.000138	-1.35	NLRP3
235030_at	0.0253342	0.000427	-1.37	NXPE3
226022_at	0.033553	0.000742	-1.38	SASH1
1556321_a_at	0.0124554	0.000125	-1.38	MESDC1
205237_at	0.0045033	2.16e-05	-1.38	FCN1
232606_at	0.0353683	0.000816	-1.38	ANK2
229465_s_at	0.036051	0.000858	-1.39	PTPRS
200798_x_at	0.0350973	0.000803	-1.39	MCL1
227859_at	0.00206	5.39e-06	-1.39	DNAJC27
1553645_at	0.028001	0.000524	-1.39	CCDC141
1553133_at	0.0269408	0.000481	-1.39	C9orf72
238649_at	0.0087552	6.87e-05	-1.42	PITPNC1
207072_at	0.0194236	0.000267	-1.42	IL18RAP
235122_at	0.028001	0.000523	-1.42	HIVEP3
226911_at	0.0421464	0.00115	-1.42	EGFLAM
224925_at	0.0333908	0.000736	-1.43	PREX1
230075_at	0.0198336	0.000276	-1.44	RAB39B
217540_at	0.028001	0.000521	-1.44	NXPE3
215838_at	0.0002995	1.24e-07	-1.45	LILRA5
229926_at	0.0158074	0.000187	-1.46	MIR3682
226333_at	0.0407184	0.00107	-1.46	IL6R
244546_at	0.0221111	0.000328	-1.46	CYCS
223533_at	0.0356159	0.000835	-1.47	LOC101927933
205225_at	0.0297619	0.000582	-1.47	ESR1
208707_at	0.0007455	7.09e-07	-1.47	EIF5
239250_at	0.0343666	0.000775	-1.48	ZNF542P
219334_s_at	0.0307825	0.000619	-1.49	NABP1
205945_at	0.0176683	0.000227	-1.49	IL6R
228749_at	0.0428373	0.00117	-1.5	ZDBF2
227178_at	0.0488625	0.00144	-1.5	CELF2
38487_at	0.0427566	0.00117	-1.51	STAB1
211143_x_at	0.0180357	0.000237	-1.51	NR4A1
207316_at	0.0019574	4.62e-06	-1.51	HAS1
201531_at	0.0069313	4.34e-05	-1.52	ZFP36
215311_at	0.0095534	7.92e-05	-1.52	NTRK3
239823_at	0.0047374	2.38e-05	-1.52	LOC101927841
232355_at	0.0330252	0.000723	-1.53	SNORD114-3
215303_at	0.0373807	0.000922	-1.53	DCLK1
234987_at	0.0406375	0.00107	-1.55	SAMHD1
202431_s_at	0.0026645	9.24e-06	-1.55	MYC
1569136_at	0.0015857	2.9e-06	-1.55	MGAT4A
238071_at	0.0066795	3.94e-05	-1.55	LCN10
220027_s_at	0.0014303	2.3e-06	-1.56	RASIP1
218625_at	0.0459804	0.00131	-1.56	NRN1
205756_s_at	0.0320699	0.000681	-1.56	F8
208609_s_at	0.0124554	0.000125	-1.57	TNXB
206876_at	0.0268806	0.000478	-1.57	SIM1
228771_at	0.0342362	0.000771	-1.59	GRK3
205876_at	0.0033301	1.35e-05	-1.6	LIFR
212230_at	0.0180357	0.000238	-1.61	PLPP3
207697_x_at	0.0176164	0.000225	-1.62	LILRB2
207442_at	0.0325979	0.000708	-1.62	CSF3
209967_s_at	0.0251016	0.000415	-1.62	CREM
230867_at	0.0421464	0.00115	-1.62	COL6A6
227791_at	0.025909	0.000439	-1.63	SLC9A9
244654_at	0.0497022	0.00148	-1.63	MYO1G
1553243_at	0.0354339	0.000822	-1.64	ITIH5
228831_s_at	0.0123918	0.000123	-1.64	GNG7
238695_s_at	0.0105739	9.19e-05	-1.65	RAB39B
228193_s_at	0.0102152	8.8e-05	-1.67	RGCC
218723_s_at	0.0140029	0.000151	-1.68	RGCC
64064_at	0.0367947	0.000889	-1.68	GIMAP1-GIMAP5
210375_at	0.0084584	6.39e-05	-1.69	PTGER3
226397_s_at	0.0070003	4.42e-05	-1.69	PHACTR1
229414_at	0.0119011	0.000114	-1.7	PITPNC1
219993_at	0.0100591	8.64e-05	-1.73	SOX17
207547_s_at	0.0194922	0.00027	-1.73	FAM107A
213960_at	0.0412034	0.0011	-1.74	NTRK3
41386_i_at	0.0002995	1.32e-07	-1.74	KDM6B
204271_s_at	0.0338378	0.000755	-1.74	EDNRB
203574_at	0.0388107	0.000983	-1.75	NFIL3
235024_at	0.0490984	0.00145	-1.75	JADE1
210432_s_at	0.0061344	3.41e-05	-1.77	SCN3A
207978_s_at	0.0070906	4.57e-05	-1.77	NR4A3
214696_at	0.0164007	0.000199	-1.77	MIR22
211776_s_at	0.0432353	0.00118	-1.77	EPB41L3
226833_at	0.001559	2.79e-06	-1.77	CYB5D1
204513_s_at	0.0045368	2.19e-05	-1.78	ELMO1
206170_at	0.023186	0.000354	-1.78	ADRB2
216233_at	0.0066352	3.88e-05	-1.8	CD163
201739_at	0.0187698	0.000253	-1.81	SGK1
216979_at	0.0446203	0.00124	-1.81	NR4A3
205792_at	0.0172326	0.000215	-1.82	WISP2
213146_at	0.0026645	9.23e-06	-1.82	KDM6B
227550_at	0.0450942	0.00127	-1.84	GFRA1
225557_at	0.0176164	0.000225	-1.84	CSRNP1
235597_s_at	0.002603	8.59e-06	-1.85	RGPD2
220244_at	0.0275175	0.000504	-1.85	LINC00312
226991_at	0.0238061	0.000372	-1.86	NFATC2
209840_s_at	0.030594	0.000611	-1.86	LRRN3
230511_at	0.0194031	0.000265	-1.86	CREM
229487_at	0.0310674	0.000632	-1.87	EBF1
220088_at	0.0454334	0.00128	-1.87	C5AR1
214582_at	0.0123856	0.000121	-1.88	PDE3B
241369_at	0.0059962	3.29e-05	-1.89	ADAMTS9-AS1
204642_at	0.0241775	0.000384	-1.9	S1PR1
227419_x_at	0.0275267	0.000505	-1.9	PLAC9
206030_at	0.0372438	0.000916	-1.91	ASPA
228442_at	0.0230679	0.000351	-1.93	NFATC2
209305_s_at	0.0477792	0.00138	-1.93	GADD45B
222164_at	0.0251682	0.000418	-1.93	FGFR1
214508_x_at	0.0371169	0.000905	-1.95	CREM
214913_at	0.011052	9.97e-05	-1.95	ADAMTS3
228325_at	0.0387406	0.000981	-1.96	SPIDR
229004_at	0.0372438	0.000918	-1.96	ADAMTS15
209304_x_at	0.0294827	0.00057	-1.98	GADD45B
230380_at	0.0224437	0.000335	-1.99	THAP2
211105_s_at	0.0221111	0.000328	-1.99	NFATC1
209841_s_at	0.0135113	0.000141	-1.99	LRRN3
226811_at	0.0479984	0.00139	-1.99	FAM46C
206359_at	0.0019219	4.22e-06	-2.01	SOCS3
225575_at	0.0310674	0.000634	-2.01	LIFR
208438_s_at	0.0322419	0.000691	-2.01	FGR
206093_x_at	0.0262067	0.000456	-2.03	TNXB
205384_at	0.0075481	5.4e-05	-2.03	FXYD1
213006_at	0.0418928	0.00113	-2.03	CEBPD
210873_x_at	0.0025792	8.14e-06	-2.05	APOBEC3A_B
203812_at	0.0038994	1.69e-05	-2.07	SLIT3
225571_at	0.0271893	0.000487	-2.07	LIFR
220037_s_at	0.038377	0.000963	-2.1	LYVE1
210162_s_at	0.0005182	3.6e-07	-2.13	NFATC1
204273_at	0.0315846	0.000663	-2.13	EDNRB
229404_at	0.0005182	3.48e-07	-2.16	TWIST2
230372_at	0.0180357	0.00024	-2.16	HAS2
221031_s_at	0.0071731	4.68e-05	-2.16	APOLD1
202340_x_at	0.028001	0.000522	-2.17	NR4A1
201236_s_at	0.0273235	0.000494	-2.17	BTG2
216333_x_at	0.0238061	0.000372	-2.19	TNXB
235798_at	0.0089575	7.09e-05	-2.21	TMEM170B
228399_at	0.0021938	6.02e-06	-2.21	OSR1
203665_at	0.0216886	0.000316	-2.22	HMOX1
206701_x_at	0.0144464	0.000163	-2.22	EDNRB
209614_at	0.0331429	0.000727	-2.23	ADH1B
219563_at	0.0294827	0.00057	-2.25	SYNE3
214156_at	0.0379712	0.000945	-2.26	MYRIP
204622_x_at	0.0376484	0.000931	-2.28	NR4A2
235735_at	0.0463857	0.00132	-2.3	TNFSF8
216248_s_at	0.0267029	0.000473	-2.31	NR4A2
222317_at	0.0049007	2.55e-05	-2.32	PDE3B
214961_at	0.0242543	0.000389	-2.32	MTUS2
237252_at	0.0047465	2.43e-05	-2.34	THBD
243813_at	0.0070216	4.47e-05	-2.34	LINC00968
227613_at	0.0123858	0.000122	-2.35	ZNF331
205612_at	0.029775	0.000583	-2.35	MMRN1
213451_x_at	0.0261329	0.000453	-2.36	TNXB
229580_at	0.0390521	0.000992	-2.36	CLSTN2
242680_at	0.0420814	0.00114	-2.36	AVPR1A
203887_s_at	0.0141573	0.000157	-2.38	THBD
205498_at	0.0391695	0.001	-2.38	GHR
204154_at	0.0479137	0.00139	-2.39	CDO1
206432_at	0.0119764	0.000115	-2.41	HAS2
206067_s_at	0.0234156	0.000361	-2.42	WT1
205478_at	0.0487657	0.00143	-2.42	PPP1R1A
206932_at	0.0314797	0.00065	-2.42	CH25H
227697_at	0.0137768	0.000147	-2.43	SOCS3
210146_x_at	0.0026291	8.81e-06	-2.45	LILRB2
226856_at	0.0259171	0.000444	-2.47	TMEM110-MUSTN1
203888_at	0.0137504	0.000146	-2.5	THBD
211663_x_at	0.0141464	0.000156	-2.5	PTGDS
221795_at	0.0330647	0.000725	-2.55	NTRK2
238835_at	0.0273472	0.000498	-2.6	AVPR1A
223467_at	0.0155534	0.000182	-2.62	RASD1
235849_at	0.0110719	0.0001	-2.63	SCARA5
1564796_at	0.0372438	0.000912	-2.63	EMP1
202242_at	0.0307313	0.000615	-2.66	TSPAN7
219059_s_at	0.0044205	2.06e-05	-2.72	LYVE1
213895_at	0.0141464	0.000156	-2.72	EMP1
213247_at	0.0154487	0.000181	-2.73	SVEP1
214370_at	0.0321266	0.000686	-2.76	S100A8
211748_x_at	0.0450942	0.00126	-2.79	PTGDS
204591_at	0.0262796	0.000458	-2.81	CHL1
220287_at	0.0207506	0.000291	-2.82	ADAMTS9
201348_at	0.019216	0.000261	-2.83	GPX3
205382_s_at	0.0213707	0.000304	-2.83	CFD
222486_s_at	0.0238918	0.000376	-2.83	ADAMTS1
214091_s_at	0.0144209	0.000162	-2.85	GPX3
213791_at	0.0040896	1.83e-05	-2.86	PENK
39402_at	0.000915	9.85e-07	-2.93	IL1B
212187_x_at	0.0351709	0.000807	-2.97	PTGDS
207977_s_at	0.0031893	1.27e-05	-2.97	DPT
223623_at	0.0465883	0.00134	-2.97	C2orf40
205863_at	0.0019075	4.15e-06	-2.98	S100A12
204575_s_at	0.0019468	4.56e-06	-3	MMP19
209074_s_at	0.0049451	2.58e-05	-3.01	FAM107A
222162_s_at	0.0347906	0.000789	-3.02	ADAMTS1
235086_at	0.0079051	5.86e-05	-3.11	THBS1
213071_at	0.0040877	1.82e-05	-3.12	DPT
218730_s_at	0.0392402	0.001	-3.2	OGN
214038_at	0.0238918	0.000376	-3.23	CCL8
1568768_s_at	0.0002728	1.02e-07	-3.23	BRE-AS1
205067_at	0.00111	1.4e-06	-3.4	IL1B
221796_at	0.0390521	0.000993	-3.44	NTRK2
227058_at	0.0156774	0.000184	-3.52	MEDAG
208335_s_at	0.0237987	0.000371	-3.52	ACKR1
229839_at	0.0086713	6.74e-05	-3.7	SCARA5
216598_s_at	0.0307905	0.00062	-3.71	CCL2
209763_at	0.0314618	0.000647	-3.85	CHRDL1
213068_at	0.0020542	5.02e-06	-3.89	DPT
202768_at	0.0174172	0.000221	-3.97	FOSB
209612_s_at	0.0362568	0.00087	-3.97	ADH1B
209959_at	0.004202	1.92e-05	-4.06	NR4A3
206211_at	0.0007451	6.62e-07	-4.07	SELE
209613_s_at	0.036051	0.000859	-4.3	ADH1B
206157_at	0.0017333	3.61e-06	-5.02	PTX3
205207_at	0.0012466	1.78e-06	-5.19	IL6

## Sheet: GSE62452
ID	adj.P.Val	P.Value	logFC	Gene.symbol
8029086	1.35e-12	1.62e-15	2.79	CEACAM5
8169504	1.63e-13	1.08e-16	2.66	SLC6A14
7908072	1.36e-16	4.1e-21	2.65	LAMC2
7909164	1.62e-14	6.32e-18	2.55	CTSE
7971077	2.43e-12	3.76e-15	2.5	POSTN
8045835	2.24e-15	2.69e-19	2.46	GALNT5
8029098	1.99e-12	2.64e-15	2.42	CEACAM6
7901175	1.44e-15	1.3e-19	2.38	TSPAN1
8058765	2.3e-12	3.32e-15	2.19	FN1
8105267	1.85e-13	1.33e-16	2.14	ITGA2
7924029	6.69e-16	4.02e-20	2.08	LAMB3
7944164	5.75e-15	1.38e-18	2.06	TMPRSS4
8056184	6.81e-11	2.66e-13	2.02	ITGB6
8146863	2.4e-12	3.54e-15	1.98	SULF1
8021584	1.98e-13	1.54e-16	1.97	SERPINB5
8098246	2.82e-09	2.82e-11	1.94	ANXA10
8138381	1.87e-11	5.39e-14	1.86	AGR2
8109926	7.58e-09	9.35e-11	1.86	GABRP
7918064	1.25e-12	1.46e-15	1.85	COL11A1
8015349	2.31e-13	1.87e-16	1.83	KRT19
8118061	1.5e-07	3.67e-09	1.81	DPCR1
8101429	1.04e-10	4.58e-13	1.76	PLAC8
8106743	1.18e-09	9.57e-12	1.76	VCAN
8179221	3.45e-07	1.02e-08	1.75	DPCR1
8066493	2.37e-11	7.27e-14	1.73	SLPI
8082928	1.16e-08	1.57e-10	1.72	CLDN18
8091385	2.14e-06	9.59e-08	1.67	CP
7915472	4.57e-15	9.61e-19	1.67	SLC2A1
8127563	2.57e-09	2.53e-11	1.65	COL12A1
7936144	1.84e-14	7.85e-18	1.65	COL17A1
8065412	2.63e-09	2.6e-11	1.65	CST1
8112980	1.42e-10	6.86e-13	1.61	EDIL3
8056257	1.11e-08	1.48e-10	1.61	FAP
8169263	5.94e-08	1.16e-09	1.6	VSIG1
7948444	4.71e-06	2.51e-07	1.59	TCN1
8042439	2.3e-12	3.3e-15	1.55	ANTXR1
8050160	3.69e-15	5.54e-19	1.55	MBOAT2
7969493	5.3e-12	9.91e-15	1.55	SCEL
7993638	2.22e-08	3.51e-10	1.55	TMC5
8016646	1.19e-07	2.75e-09	1.53	COL1A1
8134263	6.08e-08	1.19e-09	1.53	COL1A2
8130867	4.89e-10	3.13e-12	1.53	THBS2
7981514	4.38e-15	7.88e-19	1.51	AHNAK2
8001800	4.77e-11	1.72e-13	1.51	CDH11
8090180	4.82e-07	1.56e-08	1.51	MUC13
8070579	2.27e-07	6.08e-09	1.51	TFF1
8058857	9.6e-09	1.23e-10	1.49	IGFBP5
7955613	2.21e-08	3.49e-10	1.49	KRT7
8132318	1.19e-10	5.39e-13	1.47	ANLN
8092541	1.77e-09	1.61e-11	1.47	LIPH
8152703	1.83e-13	1.26e-16	1.45	FBXO32
8015387	1.95e-10	1.04e-12	1.45	KRT17
8072735	3.34e-12	5.72e-15	1.43	APOL1
7996819	3.93e-14	2.25e-17	1.43	CDH3
8008237	2.14e-11	6.48e-14	1.43	ITGA3
7930498	8.95e-10	6.85e-12	1.42	ACSL5
8129082	1.89e-13	1.42e-16	1.42	COL10A1
8046922	4.2e-07	1.33e-08	1.42	COL3A1
7902541	4.04e-08	7.29e-10	1.42	IFI44L
7951297	1.38e-08	1.94e-10	1.41	MMP12
7950933	6.32e-13	6.1e-16	1.41	NOX4
8150509	2.92e-09	2.92e-11	1.41	PLAT
7985317	2.06e-11	6.13e-14	1.39	CEMIP
7978544	9.24e-12	2.28e-14	1.39	EGLN3
8056113	8.58e-12	1.96e-14	1.39	LY75-CD302
7935058	6.27e-12	1.29e-14	1.39	MYOF
7964927	2.69e-06	1.28e-07	1.39	TSPAN8
8126820	5.44e-10	3.62e-12	1.38	ADGRF1
8139207	5.57e-09	6.24e-11	1.38	INHBA
8081235	5.5e-10	3.69e-12	1.37	COL8A1
8057620	2.15e-08	3.35e-10	1.36	COL5A2
7933312	5.28e-09	5.87e-11	1.35	ANXA8L1
8135601	5.81e-11	2.14e-13	1.35	MET
8179617	6.68e-09	7.88e-11	1.35	TRIM31
8064904	1.8e-12	2.27e-15	1.34	FERMT1
7984001	1.19e-07	2.77e-09	1.34	GCNT3
7963410	3.87e-07	1.18e-08	1.34	KRT6C
8178330	1.62e-08	2.34e-10	1.33	TRIM31
7927307	4.37e-09	4.74e-11	1.32	ANXA8L1
7927367	5.13e-09	5.68e-11	1.32	ANXA8L1
8097692	6.46e-11	2.43e-13	1.32	EDNRA
8027748	9.18e-12	2.23e-14	1.32	FXYD3
8123104	5.58e-08	1.08e-09	1.31	FNDC1
8002303	9.16e-12	2.18e-14	1.31	NQO1
8015016	1.54e-11	4.18e-14	1.31	TNS4
8135048	2.57e-06	1.21e-07	1.3	MUC17
7928429	7.6e-12	1.67e-14	1.29	PLAU
7952290	6.32e-13	6.26e-16	1.28	TRIM29
8049349	1.26e-10	5.88e-13	1.28	UGT1A3
8059905	4.22e-07	1.33e-08	1.27	COL6A3
8104758	1.42e-08	2.01e-10	1.27	NPR3
8048864	5.25e-08	1.01e-09	1.26	CCL20
7929466	1.7e-07	4.28e-09	1.26	CYP2C18
8140534	7.29e-07	2.57e-08	1.26	SEMA3C
8066214	1.55e-09	1.38e-11	1.26	TGM2
8120719	5.8e-10	4e-12	1.25	CD109
8046124	7.08e-08	1.43e-09	1.25	DHRS9
8020551	9.43e-15	3.04e-18	1.24	LAMA3
8049487	1.03e-14	3.71e-18	1.24	MLPH
8120967	1.28e-08	1.76e-10	1.24	NT5E
7961142	6.66e-06	3.79e-07	1.24	OLR1
7934906	8.15e-08	1.69e-09	1.23	ACTA2
8145293	2.32e-09	2.25e-11	1.23	ADAM28
8170648	6.45e-09	7.58e-11	1.23	BGN
8100977	2.68e-08	4.36e-10	1.23	CXCL5
7976443	1.55e-11	4.29e-14	1.23	IFI27
8009951	1.97e-14	9.48e-18	1.23	ITGB4
8102232	2.43e-12	3.8e-15	1.23	LEF1
8050537	1.9e-08	2.86e-10	1.23	MATN3
8071758	1.47e-10	7.16e-13	1.23	MMP11
8053417	8.48e-12	1.9e-14	1.22	CAPG
8067125	8.86e-11	3.73e-13	1.21	BCAS1
8146000	7.47e-10	5.52e-12	1.2	ADAM9
7942135	4.4e-12	7.97e-15	1.2	ANO1
8035517	1.7e-07	4.25e-09	1.2	COMP
7951217	0.000263	3.58e-05	1.2	MMP7
8150889	3.06e-12	5.14e-15	1.2	SDR16C5
8078014	2.47e-11	7.8e-14	1.2	SLC6A6
7919815	8.7e-07	3.2e-08	1.19	CTSK
8083941	5.3e-12	1.02e-14	1.19	ECT2
7988467	3.92e-06	2.02e-07	1.19	FBN1
7951271	9.21e-05	9.75e-06	1.19	MMP1
7973336	5.86e-11	2.18e-13	1.19	MMP14
8033674	6.81e-09	8.1e-11	1.19	MUC16
7965541	1.21e-12	1.38e-15	1.18	FGD6
8102950	9.16e-12	2.2e-14	1.18	INPP4B
8045539	1.35e-08	1.89e-10	1.17	KYNU
7969438	2.43e-11	7.51e-14	1.17	LMO7
8162394	4.9e-07	1.59e-08	1.16	ASPN
8042942	6.93e-11	2.73e-13	1.16	HK2
8060940	1.09e-07	2.46e-09	1.16	LAMP5
8047763	1.48e-08	2.1e-10	1.16	NRP2
8138613	8.62e-12	1.99e-14	1.16	OSBPL3
8014974	4.08e-09	4.39e-11	1.16	TOP2A
8104746	9.68e-09	1.25e-10	1.15	NPR3
8045688	1.73e-05	1.22e-06	1.15	TNFAIP6
8111387	3.74e-10	2.27e-12	1.14	ADAMTS12
7934898	7.78e-07	2.78e-08	1.14	ANKRD22
7898413	1.25e-09	1.04e-11	1.14	PADI1
7993588	2.58e-14	1.31e-17	1.14	TMC7
8103563	1.73e-10	8.8e-13	1.13	DDX60
7938485	6.07e-13	5.47e-16	1.13	MICAL2
8123246	3.68e-09	3.88e-11	1.13	SLC22A3
8124707	6.1e-08	1.2e-09	1.13	TRIM31
7909708	1.19e-09	9.65e-12	1.12	CENPF
8158167	4.54e-06	2.41e-07	1.12	LCN2
7945169	1.16e-07	2.66e-09	1.12	TMEM45B
8056151	6.73e-11	2.61e-13	1.11	PLA2R1
8037205	6.2e-10	4.41e-12	1.1	CEACAM1
8089082	2.94e-10	1.72e-12	1.1	DCBLD2
8114920	1.02e-07	2.24e-09	1.1	DPYSL3
8041383	5.22e-10	3.42e-12	1.1	LTBP1
8023696	0.000103	1.11e-05	1.1	SERPINB3
7979179	2.83e-10	1.62e-12	1.09	ERO1A
7902553	6.39e-08	1.27e-09	1.09	IFI44
7989985	5.3e-12	1.01e-14	1.09	ITGA11
7979710	6.7e-12	1.41e-14	1.09	PLEK2
8066822	9.93e-08	2.14e-09	1.09	SULF2
8095744	0.000157	1.88e-05	1.08	AREG
7954527	5.72e-10	3.9e-12	1.08	ARNTL2
8105348	7.26e-09	8.85e-11	1.08	GPX8
8029773	5.89e-10	4.13e-12	1.08	IGFL2
8084794	3.55e-11	1.2e-13	1.08	IL1RAP
7920297	1.39e-08	1.97e-10	1.08	S100A14
8125149	1.24e-07	2.91e-09	1.08	SLC44A4
8178653	1.24e-07	2.91e-09	1.08	SLC44A4
8179861	1.24e-07	2.91e-09	1.08	SLC44A4
8132557	4.04e-09	4.33e-11	1.07	AEBP1
8148220	2.15e-06	9.66e-08	1.07	FER1L6
7979658	3.41e-07	1e-08	1.07	GPX2
8167973	3.68e-10	2.21e-12	1.07	HEPH
8168749	5.54e-07	1.87e-08	1.07	SRPX2
8103769	1.08e-05	6.9e-07	1.06	HPGD
7960919	0.000113	1.26e-05	1.06	MFAP5
7950810	4.96e-11	1.82e-13	1.06	SYTL2
8013042	1.1e-09	8.71e-12	1.05	KRT17
7957023	3.87e-07	1.19e-08	1.05	LYZ
7934278	1.47e-10	7.22e-13	1.05	P4HA1
8065416	4.78e-10	3.03e-12	1.04	CST2
8020762	2.53e-05	1.97e-06	1.04	DSG3
8028924	2.72e-10	1.54e-12	1.04	MIA-RAB4B
7958913	1.89e-10	1e-12	1.04	OAS2
8101260	6.31e-10	4.53e-12	1.03	ANTXR2
8040113	9.43e-15	2.89e-18	1.03	ASAP2
7923086	3.07e-08	5.15e-10	1.03	ASPM
7988350	0.00115	0.000229	1.03	DUOX2
7982377	6.05e-09	7.03e-11	1.03	GREM1
8005449	2.01e-09	1.86e-11	1.03	KRT17
8120043	2.63e-12	4.31e-15	1.03	RUNX2
8115327	1.41e-06	5.79e-08	1.03	SPARC
7961215	7.07e-14	4.25e-17	1.03	STYK1
7968800	3.32e-09	3.46e-11	1.02	DGKH
8059279	1.08e-09	8.5e-12	1.02	EPHA4
8138289	1.86e-09	1.7e-11	1.02	ETV1
7963421	3.39e-05	2.82e-06	1.02	KRT6A
8108217	2.31e-07	6.23e-09	1.02	TGFBI
8086517	1.86e-10	9.7e-13	1.01	CDCP1
7954065	2.61e-11	8.4e-14	1.01	GPRC5A
7964907	6.61e-11	2.54e-13	1.01	PTPRR
7910915	4.13e-06	2.14e-07	-1.02	CHRM3
7938687	6.18e-07	2.11e-08	-1.02	NUCB2
7988987	9.4e-05	1e-05	-1.02	ONECUT1
8068684	0.000162	1.96e-05	-1.03	FAM3B
8126954	0.00184	0.000413	-1.03	PKHD1
8167027	1.49e-07	3.63e-09	-1.03	RGN
8092682	2.49e-05	1.94e-06	-1.03	SST
8056327	3.8e-07	1.15e-08	-1.04	GRB14
7913768	4.91e-05	4.46e-06	-1.04	IL22RA1
8020795	0.0271	0.0118	-1.04	TTR
8145532	5.36e-10	3.54e-12	-1.05	EPHX2
7949320	3.82e-06	1.96e-07	-1.05	GPHA2
8136807	0.00304	0.000776	-1.06	PRSS3P2
8174201	4.11e-08	7.5e-10	-1.07	BEX1
8176193	8.43e-07	3.08e-08	-1.07	F8
8046116	1.01e-05	6.36e-07	-1.09	G6PC2
8044700	3.1e-07	8.95e-09	-1.1	DPP10
8101881	8.35e-05	8.64e-06	-1.11	ADH1B
8049729	1.01e-07	2.21e-09	-1.11	AQP12B
8141016	5.08e-06	2.75e-07	-1.11	TFPI2
7908917	3.23e-10	1.93e-12	-1.12	BTG2
7989473	2.79e-07	7.82e-09	-1.12	C2CD4B
7961580	1.48e-09	1.3e-11	-1.12	LMO3
7948249	1.12e-07	2.57e-09	-1.12	SLC43A1
8060126	8.15e-08	1.69e-09	-1.13	AQP12B
7937079	2.19e-06	9.88e-08	-1.13	BNIP3
8163839	3.62e-08	6.42e-10	-1.13	C5
7951910	2.55e-07	7.03e-09	-1.14	BACE1
7991034	9.47e-07	3.55e-08	-1.15	HOMER2
8117304	2.58e-05	2.03e-06	-1.15	SLC17A4
8089402	5.17e-07	1.7e-08	-1.17	GUCA1C
8111864	5.26e-06	2.87e-07	-1.18	C6
8124196	1.32e-05	8.77e-07	-1.18	DCDC2
7918134	0.00023	3.03e-05	-1.19	AMY2B
7903425	0.00023	3.03e-05	-1.19	AMY2B
7903440	0.00023	3.03e-05	-1.19	AMY2B
8110990	4.34e-08	8.07e-10	-1.19	CTNND2
8169389	8.25e-07	2.99e-08	-1.19	PAK3
8074201	1.04e-06	3.98e-08	-1.2	ANKRD62
8166202	5.11e-06	2.77e-07	-1.2	GRPR
8057056	3.18e-10	1.89e-12	-1.2	TTN
8001531	1.03e-06	3.95e-08	-1.22	MT1G
8151532	0.000856	0.000157	-1.25	FABP4
8154848	4.81e-05	4.34e-06	-1.25	PRSS3
8036699	1.43e-05	9.75e-07	-1.25	SYCN
8042978	0.000821	0.000149	-1.27	REG3G
8135661	0.00531	0.00155	-1.28	CFTR
8119620	1.17e-05	7.59e-07	-1.28	GNMT
8136790	0.000527	8.5e-05	-1.28	PRSS2
8117288	2.82e-05	2.25e-06	-1.28	SCGN
7956229	7.54e-07	2.67e-08	-1.29	SLC39A5
8052372	1.3e-06	5.28e-08	-1.3	MIR217
8114964	0.00471	0.00133	-1.3	SPINK1
7944793	4.82e-07	1.56e-08	-1.31	OR8D4
8142270	5.75e-08	1.12e-09	-1.33	NRCAM
8009493	3.06e-05	2.49e-06	-1.35	KCNJ16
7923837	1.25e-06	5.02e-08	-1.35	PM20D1
8127065	2.14e-07	5.66e-09	-1.38	GSTA2
8095585	0.000337	4.87e-05	-1.39	SLC4A4
8144786	3.87e-11	1.34e-13	-1.39	SLC7A2
8058591	1.42e-08	2.01e-10	-1.45	ACADL
8158987	1.52e-06	6.37e-08	-1.45	CELP
7994252	1.15e-06	4.52e-08	-1.46	AQP8
7903414	0.000354	5.17e-05	-1.49	AMY2B
8053341	0.00303	0.000773	-1.49	REG3A
8136801	0.000242	3.24e-05	-1.5	PRSS3P2
8141094	4.65e-09	5.08e-11	-1.52	PDK4
8062948	7.75e-07	2.77e-08	-1.52	RBPJL
7934936	2.39e-08	3.8e-10	-1.52	SLC16A12
7990555	2.74e-06	1.31e-07	-1.53	NRG4
7988414	0.00015	1.78e-05	-1.54	GATM
8052940	1.61e-07	3.99e-09	-1.54	PAIP2B
8042986	0.000991	0.000189	-1.58	REG1A
7957221	5.32e-07	1.77e-08	-1.61	TRHDE
7925342	1.37e-09	1.18e-11	-1.62	ERO1B
8136795	0.000538	8.74e-05	-1.64	PRSS1
8098671	2.81e-07	7.89e-09	-1.67	F11
8149521	1.78e-06	7.69e-08	-1.67	FGL1
8083246	0.000561	9.24e-05	-1.71	CPB1
8002283	2.59e-08	4.2e-10	-1.73	TMED6
8047300	1.04e-10	4.56e-13	-1.77	AOX1
7991335	6.95e-08	1.4e-09	-1.78	ANPEP
7903592	2.69e-07	7.5e-09	-1.78	KIAA1324
8038633	2.42e-06	1.13e-07	-1.79	KLK1
8096845	3.49e-06	1.76e-07	-1.82	EGF
7997264	0.00018	2.24e-05	-1.84	CTRB2
7908597	1.37e-07	3.29e-09	-1.85	NR5A2
8136235	0.000236	3.14e-05	-1.9	CPA1
7991815	6.56e-07	2.27e-08	-1.94	PDIA2
7898713	2.6e-05	2.05e-06	-1.96	CELA3B
8053330	0.000783	0.000141	-1.96	REG1B
8053337	0.000398	6e-05	-1.98	REG1CP
8002845	0.000112	1.24e-05	-2.01	CTRB2
7930777	0.000201	2.57e-05	-2.03	PNLIP
8002121	1.66e-06	7.07e-08	-2.06	CTRL
7898184	1.77e-05	1.26e-06	-2.09	CELA2B
7898725	5.3e-05	4.89e-06	-2.12	CELA3A
7898176	2.55e-05	2e-06	-2.14	CELA2A
7967034	2.75e-05	2.19e-06	-2.22	PLA2G1B
8091910	8.58e-07	3.15e-08	-2.3	SERPINI2
7954377	1.92e-08	2.9e-10	-2.31	IAPP
8125936	2.66e-05	2.1e-06	-2.35	CLPS
7961524	1.97e-06	8.66e-08	-2.42	ERP27
8158976	3.11e-05	2.54e-06	-2.46	CEL
8136187	4.51e-05	4.02e-06	-2.5	CPA2
8095628	3.52e-08	6.14e-10	-2.51	ALB
7936798	2.11e-05	1.58e-06	-2.52	FAM24B-CUZD1
7898167	8.46e-06	5.05e-07	-2.57	CTRC
7999920	1.53e-05	1.06e-06	-2.6	GP2
7930804	1.59e-05	1.1e-06	-2.6	PNLIPRP2
7930790	3.06e-06	1.51e-07	-2.84	PNLIPRP1

## Sheet: GSE101448
ID	adj.P.Val	P.Value	logFC	Gene.symbol
ILMN_1674386	1.58e-11	3.68e-14	4.2	PITX1
ILMN_2228162	1.13e-09	4.62e-12	4.19	KRT16
ILMN_1806607	3.6e-10	1.2e-12	4.05	SFN
ILMN_1655915	8.27e-12	1.74e-14	3.99	MMP11
ILMN_1753449	2.51e-09	1.2e-11	3.96	CST1
ILMN_1670959	9.07e-09	5.11e-11	3.68	CEACAM5
ILMN_1745570	1.9e-06	2.67e-08	3.62	KLK7
ILMN_1715684	1.57e-09	6.91e-12	3.57	LAMB3
ILMN_1801216	7.29e-09	3.95e-11	3.44	S100P
ILMN_2196328	4.69e-11	1.25e-13	3.27	POSTN
ILMN_1651282	7.66e-08	5.93e-10	3.26	COL17A1
ILMN_1793888	1.1e-09	4.49e-12	3.22	SERPINB5
ILMN_1666845	4.17e-07	4.31e-09	3.2	KRT17
ILMN_1731433	3.49e-08	2.5e-10	3.11	AOC1
ILMN_2246555	2.1e-06	3.04e-08	3.05	MUC4
ILMN_1771538	7.66e-06	1.36e-07	3.04	PSCA
ILMN_1705403	1.42e-06	1.89e-08	3.04	CYP2S1
ILMN_1689146	4.15e-07	4.26e-09	3.02	GABRP
ILMN_1720282	1.98e-09	9.06e-12	2.98	NQO1
ILMN_2387224	7.95e-06	1.43e-07	2.94	CTSE
ILMN_1696284	0.00339	0.000229	2.91	CLDN18
ILMN_1790761	2.71e-11	6.64e-14	2.9	POSTN
ILMN_1653824	1.15e-09	4.72e-12	2.9	LAMC2
ILMN_1769388	1.57e-09	6.87e-12	2.9	GJB2
ILMN_3310080	1.1e-10	3.33e-13	2.89	MIR614
ILMN_2321153	1.52e-06	2.06e-08	2.87	MUC4
ILMN_1701424	2.13e-08	1.42e-10	2.87	LAMC2
ILMN_1686097	2.43e-08	1.66e-10	2.86	TOP2A
ILMN_1673261	3.64e-07	3.65e-09	2.86	EPS8L3
ILMN_1787193	3.22e-08	2.27e-10	2.86	CYP2S1
ILMN_1796423	6e-09	3.13e-11	2.86	CLIC3
ILMN_2093343	1.4e-06	1.87e-08	2.85	PLAC8
ILMN_2384152	2.83e-07	2.72e-09	2.83	EPS8L3
ILMN_2353161	5.1e-05	1.35e-06	2.82	MSLN
ILMN_1799887	1.56e-06	2.14e-08	2.81	CTSE
ILMN_1718173	4.32e-06	7.02e-08	2.8	CDHR2
ILMN_2334531	8e-08	6.29e-10	2.78	GJB3
ILMN_1725090	6.49e-11	1.85e-13	2.75	CTHRC1
ILMN_2301083	1.46e-11	3.34e-14	2.69	UBE2C
ILMN_1796316	7.45e-08	5.71e-10	2.69	MMP9
ILMN_1789507	9.27e-08	7.38e-10	2.69	COL11A1
ILMN_1702125	1.96e-09	8.88e-12	2.62	HOXB7
ILMN_1734653	9.07e-09	5.07e-11	2.61	FNDC1
ILMN_1806710	2.1e-06	3.04e-08	2.59	ESPN
ILMN_1660904	5.97e-05	1.63e-06	2.58	TRIM15
ILMN_1798379	3.71e-08	2.68e-10	2.58	NTM
ILMN_1665372	3.07e-06	4.71e-08	2.58	FXYD3
ILMN_2410826	1.24e-07	1.05e-09	2.56	OAS1
ILMN_2349393	4.93e-11	1.35e-13	2.56	MDK
ILMN_1774874	2.02e-09	9.26e-12	2.56	IL1RN
ILMN_1725139	0.000308	1.22e-05	2.56	CA9
ILMN_1714592	3.31e-07	3.27e-09	2.54	CDA
ILMN_3243156	3.25e-08	2.3e-10	2.54	AHNAK2
ILMN_1702363	8.88e-06	1.65e-07	2.53	SULF1
ILMN_1682599	4.61e-10	1.65e-12	2.53	GPRC5A
ILMN_1733042	7.66e-06	1.36e-07	2.53	BCAS1
ILMN_1653026	1.99e-06	2.84e-08	2.51	PLAC8
ILMN_2393765	2.98e-07	2.89e-09	2.51	IGLL1
ILMN_2327974	5.51e-12	1.11e-14	2.51	CORO2A
ILMN_1676192	0.000757	3.62e-05	2.5	SLC13A5
ILMN_2399016	4.42e-07	4.66e-09	2.49	MMP28
ILMN_3242004	3.13e-05	7.5e-07	2.49	ANXA8L1
ILMN_1658426	1.43e-06	1.91e-08	2.48	WNT10A
ILMN_1725276	0.00902	0.000763	2.48	FDCSP
ILMN_2396875	2.88e-05	6.74e-07	2.47	IGFBP3
ILMN_1746085	6.89e-05	1.94e-06	2.47	IGFBP3
ILMN_1687625	0.00103	5.32e-05	2.47	DPCR1
ILMN_1677636	3.9e-07	3.97e-09	2.45	COMP
ILMN_1731446	4.35e-08	3.21e-10	2.45	COL11A1
ILMN_1691508	1.85e-08	1.22e-10	2.43	PLAUR
ILMN_1813746	8.98e-09	5e-11	2.43	CORO2A
ILMN_1672776	1.23e-05	2.4e-07	2.43	COL10A1
ILMN_1685433	1.3e-05	2.59e-07	2.41	COL8A1
ILMN_1713561	0.000423	1.8e-05	2.4	LAMP5
ILMN_2219002	0.000104	3.24e-06	2.4	KRT6A
ILMN_2392803	1.14e-05	2.2e-07	2.4	COL11A1
ILMN_1706813	1.9e-05	4.05e-07	2.39	SLC6A14
ILMN_2402392	6.72e-07	7.76e-09	2.39	COL8A1
ILMN_1800142	1.25e-07	1.06e-09	2.38	LAMB3
ILMN_1727577	1.82e-09	8.15e-12	2.38	GLI2
ILMN_1791726	1.89e-07	1.7e-09	2.37	TUBB3
ILMN_1801899	1.08e-05	2.07e-07	2.37	PLEC
ILMN_1785444	1.46e-05	2.96e-07	2.36	LEMD1
ILMN_1721354	0.000784	3.78e-05	2.36	KRT6B
ILMN_2058782	6.61e-09	3.5e-11	2.36	IFI27
ILMN_1717793	2.47e-05	5.55e-07	2.36	C19orf33
ILMN_1683774	5.22e-08	3.9e-10	2.35	IL2RA
ILMN_2366463	2.87e-11	7.16e-14	2.35	FN1
ILMN_1701308	5.16e-08	3.84e-10	2.35	COL1A1
ILMN_1731073	3.79e-05	9.5e-07	2.35	CAPN9
ILMN_1765574	6.22e-07	7.02e-09	2.32	TFAP2A
ILMN_2125346	0.000947	4.78e-05	2.32	MUC16
ILMN_1693738	9.89e-08	8.06e-10	2.32	CTSE
ILMN_1746517	2.23e-09	1.03e-11	2.31	KYNU
ILMN_1653856	1.31e-05	2.61e-07	2.3	UBASH3B
ILMN_1711439	1.96e-09	8.87e-12	2.29	EMILIN1
ILMN_1787981	1.69e-06	2.34e-08	2.28	MFAP2
ILMN_2351466	5.74e-05	1.55e-06	2.27	NTM
ILMN_1658301	3.12e-05	7.46e-07	2.27	FAM83E
ILMN_3239771	4.65e-07	4.97e-09	2.27	DLGAP5
ILMN_2193233	5.35e-06	9.02e-08	2.26	MZB1
ILMN_1726114	1.04e-08	6.1e-11	2.25	SLC45A3
ILMN_2411864	4.45e-05	1.15e-06	2.25	PHACTR3
ILMN_2232854	3.97e-06	6.33e-08	2.25	FAP
ILMN_1678899	7.81e-05	2.24e-06	2.24	ERN2
ILMN_1690170	5.06e-05	1.33e-06	2.24	CRABP2
ILMN_1687301	4.42e-05	1.14e-06	2.23	VCAN
ILMN_1752952	7.58e-09	4.13e-11	2.23	MMP28
ILMN_1747016	1.8e-07	1.61e-09	2.23	CEP55
ILMN_1656361	2.42e-09	1.14e-11	2.23	ARHGAP27
ILMN_1730777	3.45e-07	3.43e-09	2.22	KRT19
ILMN_2176467	0.000244	9.22e-06	2.22	COX6B2
ILMN_1724375	0.0006	2.74e-05	2.21	MUC17
ILMN_1769299	4.62e-07	4.92e-09	2.21	MTMR11
ILMN_1711009	6.72e-07	7.73e-09	2.21	ISLR
ILMN_1688205	0.000123	3.98e-06	2.2	KLK10
ILMN_1672611	0.00132	7.15e-05	2.2	CDH11
ILMN_1670881	6.47e-07	7.34e-09	2.19	CHST6
ILMN_1674063	2.06e-05	4.46e-07	2.18	OAS2
ILMN_1778831	0.000923	4.63e-05	2.18	NTSR1
ILMN_1685616	1.34e-07	1.14e-09	2.18	EFNA5
ILMN_3307874	1.47e-06	1.99e-08	2.18	AIM1L
ILMN_1685625	5.19e-07	5.73e-09	2.17	UCP2
ILMN_1754476	6.89e-05	1.94e-06	2.17	TRIM15
ILMN_1704861	0.000451	1.94e-05	2.17	MYO1A
ILMN_1735156	1.98e-06	2.82e-08	2.16	SLC4A11
ILMN_1692223	0.00061	2.8e-05	2.15	LCN2
ILMN_2316236	9.7e-08	7.86e-10	2.15	HOPX
ILMN_1712082	0.00283	0.000185	2.15	GCNT3
ILMN_2311537	2.35e-08	1.59e-10	2.14	HMGA1
ILMN_1723486	8.5e-07	1.04e-08	2.14	HK2
ILMN_1749368	1.3e-06	1.7e-08	2.14	HIST1H3H
ILMN_1784532	8.17e-06	1.48e-07	2.14	COL22A1
ILMN_1753139	0.00014	4.62e-06	2.13	ZG16B
ILMN_1741755	2.4e-05	5.33e-07	2.12	TRIM29
ILMN_1722489	0.0226	0.00244	2.12	TFF1
ILMN_1764508	0.000106	3.31e-06	2.12	PTK6
ILMN_1773963	1.78e-06	2.48e-08	2.12	GNA15
ILMN_3251592	0.000148	4.92e-06	2.11	SAPCD2
ILMN_1657708	2.89e-07	2.79e-09	2.11	MGLL
ILMN_2228035	4.98e-06	8.2e-08	2.1	HS3ST1
ILMN_2389054	0.000269	1.04e-05	2.1	CLDN18
ILMN_1720433	0.00164	9.27e-05	2.09	FAM3D
ILMN_1663390	1.45e-05	2.93e-07	2.09	CDC20
ILMN_1713542	1.43e-06	1.92e-08	2.08	TRIM14
ILMN_1673886	7.66e-07	9.18e-09	2.08	SIM2
ILMN_2044453	1.64e-05	3.4e-07	2.08	LPAR5
ILMN_1716815	0.000245	9.25e-06	2.08	CEACAM1
ILMN_1814985	2.18e-07	2e-09	2.07	PDLIM7
ILMN_1710622	0.000192	6.8e-06	2.07	DUOXA1
ILMN_1704294	9.11e-07	1.13e-08	2.07	CDH3
ILMN_2349633	1.13e-07	9.31e-10	2.06	TNFRSF18
ILMN_1734827	1.17e-05	2.26e-07	2.06	MKI67
ILMN_1672908	4.4e-07	4.63e-09	2.05	TWIST1
ILMN_1710723	1.47e-07	1.27e-09	2.05	ROBO1
ILMN_2075800	2.13e-05	4.64e-07	2.05	PTK6
ILMN_2213136	1.26e-05	2.47e-07	2.05	LEF1
ILMN_1704247	1.43e-05	2.89e-07	2.05	LAMA3
ILMN_1789846	5.94e-05	1.62e-06	2.05	ITGB6
ILMN_1661825	0.000189	6.66e-06	2.03	TNFRSF6B
ILMN_1705107	4.78e-07	5.14e-09	2.03	SDCBP2
ILMN_1728049	1.41e-07	1.21e-09	2.03	S100A16
ILMN_1669335	2.23e-09	1.04e-11	2.03	RUNX1
ILMN_1708006	1.2e-06	1.55e-08	2.03	MICB
ILMN_1805410	2.51e-06	3.69e-08	2.03	C15orf48
ILMN_1679267	0.000189	6.64e-06	2.02	TGM2
ILMN_1665792	1.44e-07	1.24e-09	2.02	ITGA2
ILMN_2410612	0.00747	0.000601	2.02	DMBT1
ILMN_1693192	4.66e-05	1.21e-06	2.01	PI3
ILMN_1658247	1.86e-06	2.61e-08	2.01	OAS1
ILMN_1735996	3.87e-07	3.93e-09	2.01	NOX4
ILMN_2068257	1.47e-08	9.28e-11	2.01	MXRA8
ILMN_2133205	0.00223	0.000137	2.01	GPX2
ILMN_1710221	1.27e-06	1.65e-08	2.01	GPR35
ILMN_1697703	0.000673	3.14e-05	2	HPDL
ILMN_1706505	9.7e-08	7.86e-10	2	COL5A1
ILMN_1668411	2.85e-06	4.29e-08	1.99	FHL2
ILMN_1741165	1.9e-05	4.07e-07	1.98	SLC11A1
ILMN_1703864	0.00251	0.000159	1.98	SFTA2
ILMN_2376108	5.65e-07	6.31e-09	1.98	PSMB9
ILMN_1722798	1.56e-08	9.97e-11	1.98	PLCD3
ILMN_1664855	4.35e-05	1.12e-06	1.97	PPP1R14C
ILMN_1738589	1.59e-07	1.39e-09	1.97	MGLL
ILMN_1712065	1.53e-06	2.09e-08	1.97	FAM19A5
ILMN_1676452	1.49e-05	3.05e-07	1.97	ADAMTS14
ILMN_2370882	1.78e-06	2.48e-08	1.97	ACSL5
ILMN_1660691	0.00398	0.000277	1.96	RAB31
ILMN_2042771	1.2e-05	2.32e-07	1.96	PTTG1
ILMN_1731503	1.04e-05	1.98e-07	1.96	MARCO
ILMN_1680054	3.36e-05	8.16e-07	1.96	LAMB3
ILMN_1780255	0.000104	3.23e-06	1.96	KLK6
ILMN_1736820	1.5e-05	3.08e-07	1.96	HIST1H2BM
ILMN_1701613	5.29e-07	5.86e-09	1.95	RARRES3
ILMN_2364384	0.00104	5.35e-05	1.95	PPARG
ILMN_1710544	1.81e-05	3.82e-07	1.95	PCDH7
ILMN_1719547	4.37e-08	3.23e-10	1.95	INHBA
ILMN_1725338	0.00266	0.000171	1.95	CLDN23
ILMN_1774207	4.17e-07	4.3e-09	1.95	ANGPT2
ILMN_1811765	6.56e-10	2.47e-12	1.95	ADAMTS2
ILMN_1796949	2.38e-07	2.22e-09	1.94	TPX2
ILMN_1756814	1.11e-06	1.41e-08	1.94	PTPRE
ILMN_1752995	0.000174	6.04e-06	1.93	FAM83A
ILMN_1779043	0.00167	9.47e-05	1.93	CACNG6
ILMN_1710325	3.38e-06	5.25e-08	1.92	SCEL
ILMN_1654319	2.02e-08	1.34e-10	1.92	HAPLN3
ILMN_1770505	3.86e-05	9.75e-07	1.92	BIK
ILMN_1813641	8.49e-07	1.04e-08	1.91	TOR4A
ILMN_1656057	7.87e-05	2.26e-06	1.9	PLAU
ILMN_1807036	0.00246	0.000155	1.9	AQP5
ILMN_1657766	8.03e-07	9.7e-09	1.89	TRIM29
ILMN_1673586	7.48e-10	2.91e-12	1.89	SLC6A6
ILMN_1811049	0.00122	6.45e-05	1.89	POU2AF1
ILMN_2395496	0.00593	0.000453	1.89	KLK7
ILMN_1705258	7.55e-06	1.33e-07	1.89	CPZ
ILMN_1773079	3.13e-07	3.06e-09	1.89	COL3A1
ILMN_1662484	0.00168	9.56e-05	1.89	CLDN18
ILMN_1663453	2.41e-07	2.27e-09	1.88	HIST1H2AI
ILMN_1752965	0.000191	6.76e-06	1.88	GREM1
ILMN_1688154	0.000462	2e-05	1.87	MST1R
ILMN_1716400	5.51e-06	9.37e-08	1.87	FOXM1
ILMN_1781943	2.73e-05	6.26e-07	1.87	FAM83D
ILMN_1800082	1.04e-08	6.12e-11	1.87	B3GNT3
ILMN_2167808	0.00607	0.000467	1.86	TM4SF5
ILMN_1749044	0.00193	0.000114	1.86	NECTIN4
ILMN_2162972	8.9e-05	2.65e-06	1.86	LYZ
ILMN_1733811	4.07e-07	4.16e-09	1.86	JUP
ILMN_2057479	1.6e-05	3.3e-07	1.86	EGFL6
ILMN_2171384	2.23e-05	4.9e-07	1.86	CXCL5
ILMN_1673843	5.92e-05	1.6e-06	1.86	CST2
ILMN_1700183	0.00185	0.000109	1.86	APLNR
ILMN_1811877	7.81e-05	2.24e-06	1.86	ANTXR1
ILMN_1755974	0.000312	1.25e-05	1.86	ALDOC
ILMN_1686981	1.06e-09	4.23e-12	1.85	SULF2
ILMN_2161330	0.000257	9.84e-06	1.85	SPDEF
ILMN_1731745	9.12e-05	2.74e-06	1.85	NINJ2
ILMN_1714523	7.99e-06	1.44e-07	1.85	HEPH
ILMN_2163873	0.000114	3.62e-06	1.85	FNDC1
ILMN_1809384	0.000476	2.08e-05	1.85	CYP4F12
ILMN_2387995	4.18e-09	2.13e-11	1.85	ANTXR1
ILMN_1802100	9.95e-09	5.75e-11	1.85	ADAM28
ILMN_1743620	0.00132	7.12e-05	1.84	RARRES1
ILMN_1666222	0.00241	0.000151	1.84	PHACTR3
ILMN_2317543	0.00029	1.14e-05	1.84	ITGB4
ILMN_1689874	1.61e-06	2.21e-08	1.84	HOXB3
ILMN_1683450	0.00022	8.13e-06	1.84	CDCA5
ILMN_1794959	0.000133	4.34e-06	1.83	SLC35F3
ILMN_1789599	6.64e-07	7.61e-09	1.83	NBL1
ILMN_2370976	1.47e-06	1.98e-08	1.83	MYOF
ILMN_2198878	6.64e-07	7.6e-09	1.83	INPP4B
ILMN_1751776	3.09e-05	7.37e-07	1.83	CKAP2L
ILMN_1675640	1.08e-08	6.38e-11	1.82	OAS1
ILMN_1770612	0.000909	4.54e-05	1.82	KRT15
ILMN_2054019	0.00052	2.31e-05	1.82	ISG15
ILMN_2136147	0.000139	4.58e-06	1.82	BCAS1
ILMN_2086105	1.17e-05	2.27e-07	1.81	SPRY4
ILMN_1665033	0.000106	3.33e-06	1.81	NPR3
ILMN_1690289	0.000186	6.53e-06	1.81	DUOX1
ILMN_1799105	1.27e-05	2.51e-07	1.81	COL17A1
ILMN_2088124	0.000588	2.68e-05	1.8	TMEM154
ILMN_1713829	4.96e-05	1.3e-06	1.8	PTGES
ILMN_2374340	0.000278	1.08e-05	1.8	PLAUR
ILMN_1726448	0.00466	0.000338	1.8	MMP1
ILMN_1719975	5.18e-06	8.66e-08	1.8	HOXC4
ILMN_1778237	1.09e-10	3.27e-13	1.8	FN1
ILMN_1709333	1.76e-05	3.68e-07	1.79	OAS2
ILMN_1813206	0.00105	5.41e-05	1.79	CP
ILMN_1813704	1.2e-07	1e-09	1.79	CEMIP
ILMN_1756312	5.51e-06	9.33e-08	1.78	SEMA7A
ILMN_1688780	2.35e-08	1.59e-10	1.78	S100A4
ILMN_1781791	0.000234	8.74e-06	1.78	PRRG1
ILMN_2195482	1.28e-05	2.54e-07	1.78	CACNB3
ILMN_1678517	1.01e-05	1.9e-07	1.78	ACSL5
ILMN_2362477	0.000113	3.58e-06	1.77	TRIM31
ILMN_1684306	1.26e-08	7.74e-11	1.77	S100A4
ILMN_1770850	0.00016	5.41e-06	1.77	PNMA1
ILMN_1661895	5.38e-05	1.44e-06	1.77	PI15
ILMN_1772286	0.00177	0.000102	1.77	OCIAD2
ILMN_1706519	1.31e-06	1.71e-08	1.77	LAMC2
ILMN_1703852	0.000176	6.13e-06	1.77	EFNB2
ILMN_1744487	0.000268	1.03e-05	1.77	C1QTNF5
ILMN_1797875	3.26e-08	2.31e-10	1.77	ALOX5AP
ILMN_1711470	0.000173	6.01e-06	1.76	UBE2T
ILMN_1763011	5.44e-05	1.46e-06	1.76	SUGCT
ILMN_1800091	0.000543	2.44e-05	1.76	RARRES1
ILMN_1704286	1.51e-05	3.09e-07	1.76	FXYD5
ILMN_1654563	4.22e-05	1.09e-06	1.76	EFNB1
ILMN_1751161	0.000196	6.99e-06	1.76	COL7A1
ILMN_1779875	0.00022	8.13e-06	1.75	THY1
ILMN_1769282	0.00337	0.000227	1.75	FRMD6
ILMN_1670158	8.58e-05	2.53e-06	1.75	FAM83A
ILMN_1729117	2.73e-05	6.29e-07	1.75	COL5A2
ILMN_1748840	0.00095	4.79e-05	1.75	CALB2
ILMN_1772612	5.2e-05	1.38e-06	1.75	ANGPTL2
ILMN_1667460	2.68e-05	6.11e-07	1.74	SULF2
ILMN_3247556	1.25e-07	1.06e-09	1.74	MROH6
ILMN_2357471	2.75e-06	4.1e-08	1.74	KNL1
ILMN_1652161	2.74e-05	6.31e-07	1.73	PNKD
ILMN_1692665	4.15e-07	4.27e-09	1.72	UNC5B
ILMN_2408543	4.56e-06	7.46e-08	1.72	PLAUR
ILMN_1651568	0.00236	0.000147	1.72	MUC13
ILMN_2063168	4.25e-07	4.43e-09	1.72	MALL
ILMN_1715760	1.52e-07	1.32e-09	1.72	LGALS9
ILMN_1791580	2.63e-06	3.91e-08	1.72	FXYD3
ILMN_1692335	1.07e-06	1.35e-08	1.72	ELK3
ILMN_1773337	3.36e-05	8.18e-07	1.72	DKK1
ILMN_1783909	3.19e-08	2.23e-10	1.72	COL6A2
ILMN_1813561	3.21e-06	4.96e-08	1.71	SCIN
ILMN_1687721	3.5e-06	5.49e-08	1.71	PROC
ILMN_1659688	4.54e-10	1.61e-12	1.71	LGALS3BP
ILMN_1733756	0.000319	1.28e-05	1.71	COL12A1
ILMN_1787932	6.32e-06	1.09e-07	1.71	ADGRF1
ILMN_1666536	0.00218	0.000133	1.7	VSIG2
ILMN_1752813	8.71e-05	2.58e-06	1.7	UGT1A6
ILMN_1652918	6.79e-06	1.18e-07	1.7	RHOF
ILMN_1766668	2.75e-06	4.1e-08	1.7	PCDH7
ILMN_1758597	1.64e-05	3.4e-07	1.7	NAGS
ILMN_2406035	5.26e-05	1.4e-06	1.7	LAMA3
ILMN_2132982	1.03e-05	1.94e-07	1.7	IGFBP5
ILMN_1699421	0.00449	0.000323	1.7	ANXA10
ILMN_1780894	4.07e-08	2.98e-10	1.7	ANTXR1
ILMN_1676099	7.17e-07	8.37e-09	1.69	SPON2
ILMN_1722898	0.000134	4.39e-06	1.69	SFRP2
ILMN_1751839	3.85e-05	9.66e-07	1.69	RUNX3
ILMN_1780057	0.000897	4.47e-05	1.69	RENBP
ILMN_1667692	7.4e-05	2.1e-06	1.69	PTGIS
ILMN_1697189	0.00449	0.000323	1.69	PNCK
ILMN_1810864	8.04e-07	9.73e-09	1.69	PMP22
ILMN_1688892	0.000288	1.13e-05	1.69	LAMA3
ILMN_1783593	0.000102	3.17e-06	1.69	CCL13
ILMN_1710740	2.55e-06	3.75e-08	1.69	C2
ILMN_1704424	1.71e-08	1.11e-10	1.68	PLA2R1
ILMN_1787548	6.5e-06	1.13e-07	1.68	HSPG2
ILMN_1779855	9.71e-05	2.96e-06	1.68	HSD17B6
ILMN_1763491	1.93e-06	2.73e-08	1.68	CKMT1B
ILMN_1694588	0.000385	1.61e-05	1.68	C4BPB
ILMN_1702503	0.000352	1.44e-05	1.68	ALDH3A1
ILMN_1705750	9.26e-09	5.24e-11	1.67	TGM2
ILMN_2376484	2.42e-05	5.41e-07	1.67	NRP2
ILMN_1751444	8.12e-05	2.36e-06	1.67	NCAPG
ILMN_1770653	0.000687	3.23e-05	1.67	MAL2
ILMN_1807423	4.16e-05	1.07e-06	1.67	IGF2BP3
ILMN_1708348	1.12e-05	2.16e-07	1.67	ADAM8
ILMN_1765557	0.0206	0.00216	1.66	OLFML2B
ILMN_1762106	0.000201	7.23e-06	1.66	MMP2
ILMN_1791531	0.000358	1.47e-05	1.66	FA2H
ILMN_1692731	2.6e-05	5.91e-07	1.65	TTYH3
ILMN_1716591	0.000422	1.79e-05	1.65	SPRR1A
ILMN_1662166	0.000461	1.99e-05	1.65	PTK7
ILMN_1800225	5.03e-07	5.51e-09	1.65	PPARG
ILMN_1773125	1.54e-05	3.17e-07	1.65	ENTPD1
ILMN_2376723	0.00103	5.28e-05	1.65	CDKN2B
ILMN_1657234	0.000615	2.83e-05	1.65	CCL20
ILMN_3235176	9.27e-05	2.8e-06	1.64	TRABD2A
ILMN_1769876	2.32e-07	2.15e-09	1.64	TBC1D2
ILMN_2345142	0.00239	0.00015	1.64	SULF2
ILMN_2111932	0.0015	8.33e-05	1.64	SERINC2
ILMN_2298159	0.00052	2.31e-05	1.64	PRDM1
ILMN_1811470	0.000212	7.73e-06	1.64	PLEK2
ILMN_2372915	1.01e-05	1.91e-07	1.64	P2RY2
ILMN_1790227	9.15e-05	2.75e-06	1.64	IGFL2
ILMN_1810172	0.00166	9.46e-05	1.63	SFRP4
ILMN_1796755	1.36e-05	2.73e-07	1.63	ITGB5
ILMN_2097997	0.000256	9.77e-06	1.63	IFNE
ILMN_2124585	5.38e-05	1.44e-06	1.63	GREM1
ILMN_2104356	1.21e-09	5.11e-12	1.63	COL1A2
ILMN_3307841	9.32e-05	2.82e-06	1.63	AGR2
ILMN_2176502	2.07e-06	2.98e-08	1.62	UNC5B
ILMN_2038776	6.83e-06	1.19e-07	1.62	TXN
ILMN_3243117	9.95e-06	1.87e-07	1.62	TTC9
ILMN_1785732	0.000128	4.15e-06	1.62	TNFAIP6
ILMN_2275760	1.29e-05	2.55e-07	1.62	TFAP2A
ILMN_1743130	6.82e-05	1.91e-06	1.62	PTGFRN
ILMN_1763750	7.55e-05	2.15e-06	1.62	NPTX1
ILMN_1814270	0.0209	0.00221	1.62	LY6D
ILMN_1757736	3.64e-05	9.02e-07	1.62	IRX5
ILMN_2261416	0.00264	0.000169	1.62	CD3D
ILMN_2114720	0.00246	0.000155	1.61	SLPI
ILMN_1755318	1.96e-06	2.78e-08	1.61	HIST1H2AJ
ILMN_1742866	7.09e-05	2e-06	1.61	F2R
ILMN_1717056	0.000846	4.16e-05	1.6	TXNRD1
ILMN_1806037	0.0014	7.61e-05	1.6	TK1
ILMN_1659027	2.62e-05	5.98e-07	1.6	SLC2A1
ILMN_1766475	0.00052	2.31e-05	1.6	MGAT3
ILMN_1795442	1.11e-08	6.58e-11	1.6	LAMA4
ILMN_1689734	0.000814	3.97e-05	1.6	IL1RN
ILMN_1753613	6.72e-05	1.88e-06	1.6	HOXA5
ILMN_1678493	9.16e-05	2.76e-06	1.6	CHN1
ILMN_2371724	4.16e-05	1.07e-06	1.6	CEACAM1
ILMN_2267914	3.57e-05	8.81e-07	1.6	CD68
ILMN_1774604	6.43e-06	1.11e-07	1.59	PNKD
ILMN_1683016	1.36e-05	2.73e-07	1.59	PLA2R1
ILMN_1745077	0.000156	5.25e-06	1.59	MIA
ILMN_2368721	1.67e-05	3.49e-07	1.59	CENPM
ILMN_2153495	0.000521	2.32e-05	1.58	WNT7B
ILMN_1748685	0.00131	7.07e-05	1.58	TRIM31
ILMN_1662768	0.000362	1.49e-05	1.58	SLC9B2
ILMN_1665100	9.65e-07	1.2e-08	1.58	PTGS1
ILMN_1652017	0.000664	3.09e-05	1.58	PPEF1
ILMN_1810289	3.5e-12	6.69e-15	1.58	MYOF
ILMN_1792039	0.000798	3.87e-05	1.58	MUC4
ILMN_2167805	0.00147	8.1e-05	1.58	LUM
ILMN_1677765	9.83e-06	1.84e-07	1.58	LRP8
ILMN_1701009	0.000128	4.15e-06	1.58	EFNA2
ILMN_2261627	0.000838	4.1e-05	1.58	CTLA4
ILMN_1809928	7.13e-05	2.02e-06	1.58	COL6A2
ILMN_2072296	0.000596	2.72e-05	1.58	CKS2
ILMN_1782704	0.0202	0.00211	1.58	CD19
ILMN_1796682	3.52e-06	5.53e-08	1.57	PARP3
ILMN_1669497	6.43e-09	3.38e-11	1.57	OSBPL10
ILMN_2376205	0.000537	2.41e-05	1.57	LTB
ILMN_2334210	3.78e-07	3.83e-09	1.57	ITGB4
ILMN_1703906	0.000172	5.93e-06	1.57	HJURP
ILMN_1666179	6.5e-05	1.81e-06	1.57	HIST2H3C
ILMN_1703955	2.02e-06	2.9e-08	1.57	FBXO32
ILMN_1812926	1.84e-10	5.75e-13	1.57	ANTXR2
ILMN_1719250	0.00121	6.38e-05	1.56	SLC44A4
ILMN_2053536	8.75e-06	1.61e-07	1.56	RHBDL2
ILMN_2405009	5.82e-06	9.96e-08	1.56	NBL1
ILMN_2261876	0.000125	4.05e-06	1.56	MDK
ILMN_1698666	0.00217	0.000132	1.56	CST6
ILMN_1712522	0.00981	0.000848	1.56	CEACAM6
ILMN_1776181	4.56e-06	7.46e-08	1.56	BIRC3
ILMN_1730117	0.00113	5.9e-05	1.55	TMC5
ILMN_2085862	0.000666	3.11e-05	1.55	SLC15A3
ILMN_2368834	0.0226	0.00244	1.55	MYH11
ILMN_1717173	4.13e-06	6.65e-08	1.55	ECT2
ILMN_1711203	0.00896	0.000757	1.55	C6orf15
ILMN_1662049	0.000214	7.84e-06	1.55	AGPAT5
ILMN_1785393	1.32e-05	2.63e-07	1.55	ADAM12
ILMN_1771120	0.00315	0.00021	1.54	TMEM45B
ILMN_2187206	5.14e-06	8.58e-08	1.54	STYK1
ILMN_1806349	7.56e-05	2.16e-06	1.54	SLC6A8
ILMN_1730977	0.00265	0.00017	1.54	SLC44A4
ILMN_1671337	1.04e-07	8.56e-10	1.54	SLC2A5
ILMN_1733415	0.000858	4.23e-05	1.54	MFAP5
ILMN_1790692	0.0014	7.63e-05	1.54	GNLY
ILMN_2289381	0.00028	1.09e-05	1.54	DKK3
ILMN_1740938	1.36e-05	2.72e-07	1.54	APOE
ILMN_1756501	2.83e-05	6.58e-07	1.53	ST6GAL1
ILMN_1730825	7.46e-05	2.13e-06	1.53	SGO1
ILMN_1697220	8.63e-06	1.59e-07	1.53	NT5E
ILMN_1708743	3.5e-07	3.48e-09	1.53	NT5DC2
ILMN_2071641	0.00444	0.000318	1.53	KCNK1
ILMN_2112580	1.23e-08	7.41e-11	1.53	FCGR3A
ILMN_1774602	0.00111	5.79e-05	1.53	FBLN2
ILMN_1737728	0.0029	0.00019	1.53	CDCA3
ILMN_1674036	0.000194	6.92e-06	1.53	BIRC7
ILMN_1799243	0.00366	0.00025	1.53	ANXA13
ILMN_1751079	0.00742	0.000596	1.52	TAP1
ILMN_1700448	0.000505	2.23e-05	1.52	SIM2
ILMN_1782403	3.38e-06	5.27e-08	1.52	PRR11
ILMN_1708098	0.00012	3.84e-06	1.52	LIX1L
ILMN_1735700	0.00142	7.79e-05	1.52	KLK8
ILMN_1701789	0.000313	1.25e-05	1.52	IFIT3
ILMN_2184373	0.0111	0.000997	1.52	CXCL8
ILMN_1724941	0.00129	6.93e-05	1.52	CDCP1
ILMN_1651826	0.000432	1.84e-05	1.52	BASP1
ILMN_2167426	0.000231	8.62e-06	1.52	ASPHD2
ILMN_1703263	0.000834	4.08e-05	1.51	SP140
ILMN_1815745	0.00152	8.47e-05	1.51	SOX4
ILMN_2067370	0.00503	0.000372	1.51	SNRPF
ILMN_1765641	0.00164	9.32e-05	1.51	SEMA3A
ILMN_2335704	5.18e-06	8.65e-08	1.51	NCF4
ILMN_1737514	5.18e-06	8.69e-08	1.51	KYNU
ILMN_3243682	0.0013	7e-05	1.51	FAM213B
ILMN_2341611	3.22e-05	7.75e-07	1.51	CDCP1
ILMN_1801939	1.07e-05	2.03e-07	1.51	CCNB2
ILMN_1736178	0.00178	0.000103	1.51	AEBP1
ILMN_2241124	2.33e-06	3.42e-08	1.51	ADGRF1
ILMN_1728009	0.000947	4.78e-05	1.5	TMEM171
ILMN_1746598	3.81e-06	6.06e-08	1.5	SCNM1
ILMN_1731736	3.27e-05	7.92e-07	1.5	RIN3
ILMN_1709795	9.52e-05	2.89e-06	1.5	RAC2
ILMN_2067444	0.000245	9.25e-06	1.5	ONECUT3
ILMN_1723962	9.17e-05	2.76e-06	1.5	LXN
ILMN_1802434	0.00126	6.72e-05	1.5	JPH2
ILMN_2405684	9.08e-05	2.72e-06	1.5	BIRC3
ILMN_1683263	0.00203	0.000121	1.49	TSPAN8
ILMN_2396639	1.44e-05	2.92e-07	1.49	PDLIM7
ILMN_1784459	0.000166	5.7e-06	1.49	MMP3
ILMN_1656321	2.28e-05	5.01e-07	1.49	LTBP1
ILMN_1718936	0.00154	8.67e-05	1.49	LST1
ILMN_1755620	0.00215	0.00013	1.49	IER5L
ILMN_1682428	0.000329	1.33e-05	1.49	HENMT1
ILMN_1737650	0.00228	0.000141	1.49	DIO2
ILMN_1656920	3.53e-06	5.55e-08	1.49	CRIP1
ILMN_1785272	2.68e-09	1.3e-11	1.49	COL1A2
ILMN_1666305	1.24e-09	5.25e-12	1.49	CDKN3
ILMN_2112357	2.55e-05	5.78e-07	1.49	CD300LF
ILMN_1763386	0.00147	8.13e-05	1.49	BID
ILMN_1813881	5.16e-05	1.37e-06	1.49	APOBEC1
ILMN_1717909	0.00093	4.67e-05	1.49	ANO1
ILMN_1678842	8.87e-06	1.64e-07	1.48	THBS2
ILMN_1810835	0.00779	0.000635	1.48	SPRR3
ILMN_2049021	0.000337	1.36e-05	1.48	PTTG3P
ILMN_1681721	0.00032	1.28e-05	1.48	OASL
ILMN_3246479	1.64e-05	3.4e-07	1.48	LOC100130872
ILMN_1652065	0.00932	0.000794	1.48	KCNMB1
ILMN_2117508	2.42e-06	3.56e-08	1.48	CTHRC1
ILMN_1658094	0.000507	2.24e-05	1.47	ZNF365
ILMN_2101885	0.027	0.00308	1.47	TUBB
ILMN_2092223	6e-05	1.64e-06	1.47	TMEM92
ILMN_1804822	0.0111	0.000997	1.47	SRXN1
ILMN_1784948	0.000104	3.25e-06	1.47	SPOCD1
ILMN_1691048	1.22e-06	1.57e-08	1.47	SLC22A18AS
ILMN_1659255	0.0016	9.03e-05	1.47	RP2
ILMN_1667417	4.01e-05	1.02e-06	1.47	RAB23
ILMN_1787190	7.91e-05	2.28e-06	1.47	NRP2
ILMN_1707310	1.13e-06	1.43e-08	1.47	MGLL
ILMN_2379326	0.000169	5.83e-06	1.47	MAP3K7
ILMN_1653965	0.0029	0.00019	1.47	ITGB4
ILMN_1656310	0.00252	0.00016	1.47	IDO1
ILMN_1705201	6.57e-06	1.15e-07	1.47	FOXC2
ILMN_1657955	0.000299	1.18e-05	1.47	FMNL3
ILMN_2355831	1.34e-06	1.76e-08	1.47	FHL2
ILMN_1696360	0.000348	1.42e-05	1.47	CTSB
ILMN_1776490	0.000205	7.42e-06	1.47	C17orf53
ILMN_3297126	0.00038	1.58e-05	1.46	TYMP
ILMN_1663866	3.27e-05	7.9e-07	1.46	TGFBI
ILMN_2311796	0.000666	3.11e-05	1.46	TES
ILMN_1725320	0.000122	3.93e-06	1.46	SIGLEC1
ILMN_1700310	0.000868	4.3e-05	1.46	SDCBP2
ILMN_1679185	1.1e-05	2.09e-07	1.46	LEF1
ILMN_2222008	0.000219	8.05e-06	1.46	KIFC1
ILMN_1653836	0.00606	0.000466	1.46	KIAA1549L
ILMN_1741970	3.68e-05	9.16e-07	1.46	JUP
ILMN_1801246	0.000215	7.9e-06	1.46	IFITM1
ILMN_1674908	7.21e-07	8.47e-09	1.46	HOXB5
ILMN_1700428	0.000112	3.56e-06	1.46	HLA-DOB
ILMN_2368718	0.00207	0.000124	1.46	CENPM
ILMN_2112256	0.00465	0.000337	1.45	TNFRSF4
ILMN_1762262	0.000679	3.18e-05	1.45	PKIA
ILMN_1741917	1.24e-06	1.6e-08	1.45	OSCAR
ILMN_2111237	0.000173	5.98e-06	1.45	MN1
ILMN_1738725	0.00263	0.000168	1.45	LIF
ILMN_1750324	0.000117	3.76e-06	1.45	IGFBP5
ILMN_1652280	2.39e-05	5.29e-07	1.45	FBXO32
ILMN_2388547	0.00313	0.000208	1.45	EPSTI1
ILMN_2246563	1.1e-05	2.11e-07	1.45	COL8A1
ILMN_1660654	0.000133	4.36e-06	1.45	CDCA2
ILMN_1687583	0.00588	0.000448	1.45	CAV1
ILMN_1785902	7.18e-07	8.41e-09	1.45	C1QC
ILMN_1811238	0.00186	0.000109	1.45	ALPK2
ILMN_1741148	2.83e-05	6.58e-07	1.45	ALDOA
ILMN_1809850	6.45e-06	1.12e-07	1.44	RCN3
ILMN_2376050	0.00214	0.000129	1.44	FXYD3
ILMN_1708486	3.4e-06	5.3e-08	1.44	CNN2
ILMN_2181432	0.000447	1.92e-05	1.43	SPC24
ILMN_1728262	0.0127	0.00118	1.43	SAA2
ILMN_1716651	5.58e-05	1.5e-06	1.43	RUNX2
ILMN_1801504	0.000212	7.74e-06	1.43	RUNX1
ILMN_1775327	3e-11	7.66e-14	1.43	PKM
ILMN_1676088	0.00185	0.000108	1.43	MSRB3
ILMN_1722438	0.00218	0.000133	1.43	MGAT4B
ILMN_1654571	2.37e-07	2.19e-09	1.43	FCHO1
ILMN_1753933	0.000194	6.93e-06	1.43	FAM150A
ILMN_1662843	0.000173	5.99e-06	1.43	CD53
ILMN_3247023	0.000303	1.2e-05	1.43	CASC15
ILMN_1678841	0.00196	0.000116	1.42	UBD
ILMN_1670705	2e-06	2.87e-08	1.42	STON2
ILMN_2204545	0.00638	0.000496	1.42	ST3GAL4
ILMN_1739496	0.0258	0.00291	1.42	PRRX1
ILMN_1713901	0.00642	0.000501	1.42	KDELR3
ILMN_1692678	1.78e-05	3.75e-07	1.42	FMNL3
ILMN_1691892	5.82e-06	9.96e-08	1.41	TAGLN2
ILMN_1695475	0.000522	2.33e-05	1.41	SEMA3C
ILMN_1787026	0.00845	0.000705	1.41	SEC61G
ILMN_1788267	0.00844	0.000703	1.41	PPP1R14D
ILMN_1701195	4.79e-05	1.25e-06	1.41	PLA2G7
ILMN_1672650	7.41e-07	8.75e-09	1.41	PKM
ILMN_1658695	3.19e-06	4.93e-08	1.41	NUF2
ILMN_2112988	1.89e-05	4.02e-07	1.41	NCF1C
ILMN_1741404	0.0051	0.000378	1.41	MSC
ILMN_1695658	0.000474	2.07e-05	1.41	KIF20A
ILMN_1791759	0.00156	8.78e-05	1.41	CXCL10
ILMN_1681998	0.000161	5.47e-06	1.41	AP2B1
ILMN_2098616	0.00232	0.000144	1.41	ANXA2R
ILMN_1664631	0.000213	7.79e-06	1.41	ADAM28
ILMN_1751500	5.53e-06	9.42e-08	1.41	ADAM15
ILMN_1690939	4.36e-05	1.13e-06	1.4	TYMP
ILMN_1797236	3.23e-07	3.18e-09	1.4	TGM2
ILMN_1815205	6.59e-05	1.84e-06	1.4	LYZ
ILMN_1757011	2.75e-06	4.09e-08	1.4	LY75
ILMN_1718898	0.00299	0.000197	1.4	HOXC9
ILMN_1814015	0.0062	0.000479	1.4	CDH17
ILMN_1737184	2.93e-05	6.87e-07	1.4	CDCA7
ILMN_1699695	4.24e-07	4.41e-09	1.39	TNFRSF21
ILMN_1724407	0.00226	0.000139	1.39	TACC3
ILMN_1703855	0.00582	0.000444	1.39	SERPINB3
ILMN_1790338	0.000577	2.61e-05	1.39	PRRX2
ILMN_1713505	2.39e-05	5.29e-07	1.39	NPC1
ILMN_1674759	0.000402	1.7e-05	1.39	LPCAT4
ILMN_1651343	1.2e-05	2.34e-07	1.39	ITGA11
ILMN_2201678	0.0401	0.00519	1.39	FSTL1
ILMN_2239774	0.00128	6.82e-05	1.39	FAM83A
ILMN_1791711	0.000472	2.05e-05	1.39	DUOXA2
ILMN_2398159	0.0224	0.00241	1.39	DKK3
ILMN_3250067	0.0018	0.000105	1.39	ANGPT2
ILMN_1664362	9.18e-05	2.77e-06	1.38	SGIP1
ILMN_1725852	0.000522	2.32e-05	1.38	S100A2
ILMN_1689177	0.00108	5.6e-05	1.38	PLPP4
ILMN_2109416	0.00885	0.000745	1.38	NAPSB
ILMN_1765621	0.00158	8.9e-05	1.38	HDGF
ILMN_1785404	0.00267	0.000172	1.38	FGFBP1
ILMN_2104141	0.0014	7.67e-05	1.38	FGD5
ILMN_1679262	0.0315	0.00375	1.38	DPYSL3
ILMN_1681612	0.0236	0.00258	1.38	DMBT1
ILMN_1712389	3.79e-05	9.49e-07	1.38	CKLF
ILMN_1718866	0.0109	0.000971	1.38	C5orf46
ILMN_1670379	1.43e-07	1.23e-09	1.38	ANTXR1
ILMN_3240901	0.00039	1.63e-05	1.37	ZBTB7C
ILMN_2109708	2.59e-06	3.84e-08	1.37	TYMP
ILMN_1712708	0.00108	5.63e-05	1.37	TRIM47
ILMN_2085012	4.91e-10	1.77e-12	1.37	TMEM176B
ILMN_1714041	0.000196	7.02e-06	1.37	PLCB3
ILMN_1745420	8.72e-05	2.58e-06	1.37	PHF19
ILMN_1690125	9.35e-05	2.84e-06	1.37	PDLIM7
ILMN_2329667	0.00987	0.000855	1.37	MYO7B
ILMN_1766157	4.85e-05	1.27e-06	1.37	MRVI1
ILMN_1722820	0.0448	0.00596	1.37	KDELR3
ILMN_2311166	0.000616	2.84e-05	1.37	ITGB5
ILMN_1673609	2.46e-05	5.53e-07	1.37	ISLR
ILMN_3239965	0.00103	5.27e-05	1.37	IDO1
ILMN_1739076	0.000262	1.01e-05	1.37	HIST1H2BO
ILMN_1692831	7.63e-05	2.18e-06	1.37	HIST1H1A
ILMN_1738825	8.17e-05	2.39e-06	1.37	HIC1
ILMN_1671142	7.96e-05	2.3e-06	1.37	GPR68
ILMN_2111187	0.000717	3.39e-05	1.37	ELOVL6
ILMN_1704196	0.0177	0.0018	1.37	DSG2
ILMN_2307861	7.59e-06	1.34e-07	1.37	COL6A3
ILMN_1763666	0.00305	0.000202	1.37	ALDH3B2
ILMN_1744299	0.000632	2.92e-05	1.37	ADGRF1
ILMN_2331729	0.00282	0.000184	1.36	TRIM17
ILMN_1706021	5.13e-06	8.55e-08	1.36	TMPRSS4
ILMN_1679051	0.00117	6.18e-05	1.36	PTPRR
ILMN_1711422	0.000396	1.67e-05	1.36	PLEKHN1
ILMN_1670660	2.41e-05	5.37e-07	1.36	NPTX1
ILMN_3237376	0.000744	3.54e-05	1.36	GRAMD1B
ILMN_1737011	0.0037	0.000253	1.36	GOLM1
ILMN_2329735	2.52e-05	5.7e-07	1.36	ECM1
ILMN_2328094	6.44e-05	1.78e-06	1.36	DACT1
ILMN_1653766	0.00038	1.58e-05	1.36	CCL24
ILMN_1659189	0.000473	2.06e-05	1.36	CARD19
ILMN_2358134	0.000102	3.15e-06	1.36	ADAMTS14
ILMN_1778599	0.0018	0.000105	1.35	SP140
ILMN_1672589	0.000922	4.63e-05	1.35	SEMA4B
ILMN_1730797	5.02e-06	8.3e-08	1.35	RUNX1
ILMN_2108357	3.1e-06	4.77e-08	1.35	RPL39L
ILMN_3233388	0.00179	0.000104	1.35	RELL1
ILMN_2366634	1.25e-06	1.61e-08	1.35	PKM
ILMN_1773760	0.014	0.00134	1.35	PAICS
ILMN_1683905	9.18e-05	2.77e-06	1.35	MISP
ILMN_2409220	0.000309	1.23e-05	1.35	HMMR
ILMN_1743145	0.000362	1.49e-05	1.35	ERAP2
ILMN_1676528	0.000447	1.92e-05	1.35	BTN3A2
ILMN_3237961	0.00239	0.000149	1.35	ANO1
ILMN_1777683	0.000256	9.8e-06	1.35	ADAMTSL4
ILMN_1703305	1.99e-05	4.29e-07	1.34	TWF2
ILMN_2169801	0.00695	0.000551	1.34	TPSAB1
ILMN_1662140	0.000297	1.17e-05	1.34	SGPP2
ILMN_1668559	0.000288	1.13e-05	1.34	RGS10
ILMN_1672876	0.00346	0.000234	1.34	MELTF
ILMN_2163723	0.000158	5.35e-06	1.34	KRT7
ILMN_1659913	0.00022	8.1e-06	1.34	ISG20
ILMN_2384591	1.23e-07	1.03e-09	1.34	HN1
ILMN_1694780	0.000452	1.95e-05	1.34	GCHFR
ILMN_1653708	3.99e-05	1.02e-06	1.34	CORO1B
ILMN_1696494	0.00229	0.000142	1.34	CMTM6
ILMN_1782618	0.0303	0.00357	1.34	C9orf16
ILMN_1757757	0.000215	7.88e-06	1.33	TM6SF2
ILMN_3239775	0.00176	0.000102	1.33	TENM4
ILMN_1746013	0.000746	3.55e-05	1.33	SPOCK1
ILMN_1796734	0.0311	0.00371	1.33	SPARC
ILMN_2073758	0.00233	0.000145	1.33	MMP12
ILMN_1714433	1.37e-08	8.59e-11	1.33	MARCKSL1
ILMN_1718863	0.000278	1.08e-05	1.33	KCNK1
ILMN_1747593	6e-05	1.64e-06	1.33	ISLR
ILMN_1759232	0.000476	2.07e-05	1.33	IRS1
ILMN_1808707	0.00353	0.000239	1.33	FSCN1
ILMN_1658333	2e-06	2.87e-08	1.33	ECM1
ILMN_1798475	0.000424	1.8e-05	1.33	CSF2RB
ILMN_1682737	0.00396	0.000275	1.33	CHRDL2
ILMN_1723198	0.0251	0.0028	1.33	CDKN2B
ILMN_1747655	0.000255	9.73e-06	1.33	CCDC74B
ILMN_1794863	2.68e-09	1.29e-11	1.33	CAMK2N1
ILMN_1713124	0.0107	0.000944	1.33	AKR1C3
ILMN_1679520	0.00299	0.000197	1.33	AGPAT1
ILMN_1727524	2.14e-08	1.44e-10	1.33	ADAM9
ILMN_2333219	0.000547	2.46e-05	1.33	ACHE
ILMN_1784799	8.46e-05	2.49e-06	1.32	TRIM59
ILMN_1719759	0.000741	3.52e-05	1.32	TNC
ILMN_1773459	0.0214	0.00227	1.32	SOX11
ILMN_1804415	0.00258	0.000164	1.32	SMAGP
ILMN_2102069	0.000162	5.5e-06	1.32	SLC16A4
ILMN_2401344	0.0105	0.000926	1.32	PPP2R2C
ILMN_1723035	0.00442	0.000316	1.32	OLR1
ILMN_1680738	2.44e-05	5.46e-07	1.32	NREP
ILMN_1739840	0.00128	6.88e-05	1.32	LRRC8A
ILMN_1799667	7.05e-06	1.24e-07	1.32	KIF4A
ILMN_1775762	4.38e-05	1.13e-06	1.32	GNAI2
ILMN_2114568	0.00412	0.000289	1.32	GBP5
ILMN_1748883	9.12e-06	1.7e-07	1.32	CDKN2D
ILMN_2366212	0.0304	0.00359	1.32	CD79B
ILMN_1771333	0.00118	6.19e-05	1.32	CD47
ILMN_1715131	0.0433	0.00572	1.32	CCR7
ILMN_1681644	3.05e-05	7.24e-07	1.32	BIRC3
ILMN_1767362	0.000166	5.67e-06	1.32	ADAMTS6
ILMN_1765994	1.4e-05	2.82e-07	1.31	ZBP1
ILMN_1713499	1.63e-06	2.26e-08	1.31	WISP1
ILMN_1780825	2.81e-09	1.37e-11	1.31	RRAS
ILMN_1676102	0.00175	0.000101	1.31	NHS
ILMN_1794803	6.46e-05	1.79e-06	1.31	NDP
ILMN_1771039	0.00118	6.23e-05	1.31	GTSE1
ILMN_1731525	8.27e-05	2.43e-06	1.31	GJB3
ILMN_1812494	0.000199	7.12e-06	1.31	GDA
ILMN_1653358	0.0118	0.00108	1.31	FUT3
ILMN_1735488	0.000602	2.75e-05	1.31	FRRS1
ILMN_1766650	0.00618	0.000478	1.31	FOXA1
ILMN_1714087	1.2e-05	2.34e-07	1.31	DGKH
ILMN_1801068	0.00169	9.64e-05	1.31	DACT1
ILMN_1740407	0.0129	0.0012	1.31	CHSY3
ILMN_2332250	5.92e-05	1.6e-06	1.31	ACOT7
ILMN_1727589	0.000589	2.68e-05	1.3	SULT2B1
ILMN_1802105	8.13e-07	9.91e-09	1.3	STYK1
ILMN_1783185	0.00124	6.57e-05	1.3	SOX21
ILMN_1728168	0.0189	0.00194	1.3	PRELID3B
ILMN_1759206	0.00962	0.000826	1.3	PLS1
ILMN_2205999	0.00347	0.000235	1.3	OSMR
ILMN_1674811	1.01e-05	1.89e-07	1.3	OASL
ILMN_3240247	0.00962	0.000827	1.3	NOP10
ILMN_1653711	6.02e-05	1.65e-06	1.3	FZD2
ILMN_1702105	0.000165	5.66e-06	1.3	EFS
ILMN_1743032	0.00118	6.21e-05	1.3	CTSS
ILMN_1655821	8.13e-05	2.37e-06	1.3	CAPG
ILMN_2225548	0.000919	4.6e-05	1.29	ZNF521
ILMN_1812001	0.00372	0.000255	1.29	VASP
ILMN_3251207	0.000885	4.39e-05	1.29	TMEM19
ILMN_1738116	0.0479	0.00653	1.29	TMEM119
ILMN_1794677	0.0215	0.00229	1.29	TMC6
ILMN_1757052	0.000133	4.34e-06	1.29	SLC16A1
ILMN_1678669	0.00675	0.000533	1.29	RRM2
ILMN_1656915	0.000574	2.6e-05	1.29	PSD3
ILMN_1780667	0.00516	0.000384	1.29	POC1A
ILMN_3302919	0.00185	0.000109	1.29	MYOF
ILMN_1801766	0.000316	1.27e-05	1.29	MCUB
ILMN_2375002	3.07e-06	4.71e-08	1.29	MAP4K4
ILMN_3245702	0.000239	8.98e-06	1.29	IFNE
ILMN_1807277	0.00266	0.000171	1.29	IFI30
ILMN_1718285	0.000655	3.04e-05	1.29	HOXC8
ILMN_1756022	0.000433	1.85e-05	1.29	HIST1H2AM
ILMN_1699750	0.0259	0.00292	1.29	EPHX3
ILMN_2313946	9.85e-05	3.01e-06	1.29	CPNE7
ILMN_1766925	3.86e-05	9.76e-07	1.29	CDH13
ILMN_1654411	1.88e-05	3.99e-07	1.29	CCL18
ILMN_1733904	0.0076	0.000615	1.29	BPIFB1
ILMN_1666902	0.00394	0.000273	1.29	ADGRG5
ILMN_1715927	0.00962	0.000826	1.28	VSTM2L
ILMN_3223126	0.014	0.00134	1.28	TYMP
ILMN_2412046	0.00639	0.000498	1.28	TRIM54
ILMN_1745397	4.18e-05	1.07e-06	1.28	OAS3
ILMN_1814221	0.00231	0.000143	1.28	NPTX1
ILMN_1682993	0.0107	0.000954	1.28	NKG7
ILMN_1697309	0.00017	5.85e-06	1.28	NCF1
ILMN_1733937	3.56e-05	8.74e-07	1.28	MMD
ILMN_2366864	8.12e-05	2.36e-06	1.28	JUP
ILMN_2091347	0.001	5.09e-05	1.28	IDH1
ILMN_1665832	0.00148	8.18e-05	1.28	ID1
ILMN_1727709	0.00398	0.000277	1.28	GPBAR1
ILMN_1789575	0.000431	1.84e-05	1.28	GJB3
ILMN_2366330	0.000106	3.3e-06	1.28	FERMT3
ILMN_1769092	0.000117	3.76e-06	1.28	EVA1B
ILMN_2250344	0.00968	0.000835	1.28	DACT1
ILMN_1763907	0.00682	0.000539	1.28	CENPW
ILMN_1724805	0.00763	0.000618	1.28	CDHR5
ILMN_2413808	0.000512	2.27e-05	1.28	CD53
ILMN_2361181	0.00324	0.000217	1.28	C1QTNF6
ILMN_1729288	0.014	0.00133	1.28	C1QTNF6
ILMN_1688631	2.98e-06	4.52e-08	1.28	APOL1
ILMN_2409167	1.04e-05	1.97e-07	1.28	ANXA2
ILMN_1773959	0.0079	0.000647	1.27	ST6GALNAC5
ILMN_1653161	0.00324	0.000216	1.27	SNCG
ILMN_1740923	0.00972	0.000839	1.27	SLC52A3
ILMN_1753377	0.00181	0.000106	1.27	RASGRF2
ILMN_1767006	1.32e-05	2.63e-07	1.27	PSMB8
ILMN_2131103	0.000558	2.52e-05	1.27	PPP1R3B
ILMN_1737695	0.00581	0.000443	1.27	PDGFB
ILMN_2313079	0.00104	5.36e-05	1.27	NLRP1
ILMN_1791508	0.000255	9.74e-06	1.27	MMP28
ILMN_1739428	2.6e-05	5.92e-07	1.27	IFIT2
ILMN_1788489	0.000759	3.64e-05	1.27	HIST1H3F
ILMN_1701403	4.22e-07	4.38e-09	1.27	HIP1
ILMN_1662799	0.00151	8.42e-05	1.27	GPSM3
ILMN_1715748	0.000394	1.66e-05	1.27	FLNC
ILMN_1761322	0.000876	4.35e-05	1.27	FHOD3
ILMN_1765796	6.5e-06	1.13e-07	1.27	ENO2
ILMN_1757270	0.00253	0.000161	1.27	DBN1
ILMN_1801584	3.7e-05	9.24e-07	1.27	CXCR4
ILMN_2147517	0.000404	1.71e-05	1.27	CD58
ILMN_2208903	0.0414	0.00541	1.27	CD52
ILMN_1687035	1.25e-05	2.45e-07	1.27	ADAMTSL4
ILMN_1796628	7.16e-05	2.03e-06	1.27	ADAMTS2
ILMN_1721067	1.25e-08	7.63e-11	1.26	WISP1
ILMN_2059689	0.00038	1.58e-05	1.26	TMEM54
ILMN_1689306	0.0136	0.00129	1.26	TMC7
ILMN_2275502	0.0167	0.00166	1.26	RAPH1
ILMN_1797776	0.00556	0.00042	1.26	PRSS23
ILMN_1687501	0.00145	7.96e-05	1.26	MOXD1
ILMN_1770293	0.0264	0.00299	1.26	KLF5
ILMN_1794386	0.00418	0.000295	1.26	IL2RG
ILMN_1710985	0.00052	2.31e-05	1.26	GLIS2
ILMN_1811006	0.000138	4.54e-06	1.26	E2F8
ILMN_2047112	0.0264	0.00299	1.26	DPCD
ILMN_2165867	0.000744	3.54e-05	1.26	DHCR7
ILMN_1744604	2.55e-06	3.76e-08	1.26	CYBA
ILMN_1748323	0.00227	0.00014	1.26	CXCL14
ILMN_1690907	0.000346	1.41e-05	1.26	CCR6
ILMN_1797604	0.00126	6.69e-05	1.26	CAP1
ILMN_1672148	0.00389	0.000268	1.26	AKR1B10
ILMN_1813530	0.00496	0.000365	1.26	AGT
ILMN_1705247	8.91e-06	1.65e-07	1.26	ACSL5
ILMN_1676413	0.00199	0.000119	1.25	VSNL1
ILMN_1710899	0.00544	0.000409	1.25	TSPAN18
ILMN_1679836	0.0287	0.00334	1.25	SYT8
ILMN_2364022	1.5e-05	3.07e-07	1.25	SLC16A3
ILMN_2226343	0.00155	8.68e-05	1.25	RASSF3
ILMN_1657823	5.36e-05	1.43e-06	1.25	PMEPA1
ILMN_2375003	1.47e-06	2e-08	1.25	MAP4K4
ILMN_2140059	2.69e-08	1.85e-10	1.25	LAMA4
ILMN_1739726	0.00796	0.000653	1.25	JSRP1
ILMN_1731349	0.0208	0.00219	1.25	HOXA13
ILMN_1749553	0.00389	0.000269	1.25	ENTPD2
ILMN_1667626	0.000484	2.12e-05	1.25	EGLN3
ILMN_2067408	0.000632	2.92e-05	1.25	CLRN3
ILMN_1688670	0.000806	3.92e-05	1.25	CDCP1
ILMN_2070896	0.00196	0.000116	1.25	BMPR2
ILMN_1660970	8.39e-05	2.47e-06	1.25	ADAMTS12
ILMN_1804051	1.47e-06	1.98e-08	1.24	SNX8
ILMN_1747195	8.18e-05	2.4e-06	1.24	PSMB8
ILMN_1697491	0.0227	0.00246	1.24	PRR5L
ILMN_2139816	1.16e-05	2.25e-07	1.24	GPSM2
ILMN_1718552	0.017	0.0017	1.24	CXCL13
ILMN_1743340	0.0378	0.00478	1.24	CHST14
ILMN_1664516	0.000697	3.28e-05	1.24	CENPF
ILMN_2379644	0.00145	7.99e-05	1.24	CD74
ILMN_1739719	0.000906	4.52e-05	1.24	ASPH
ILMN_2041101	0.000824	4.03e-05	1.24	ANXA2P1
ILMN_2091310	8.72e-07	1.08e-08	1.24	ANO1
ILMN_2131293	0.047	0.00636	1.24	ALG1L
ILMN_2078592	0.0101	0.000878	1.24	ADTRP
ILMN_2262510	0.000418	1.78e-05	1.23	TBX1
ILMN_1710522	0.000505	2.23e-05	1.23	RUNX1T1
ILMN_1750861	0.00075	3.58e-05	1.23	PML
ILMN_1694400	8.47e-06	1.54e-07	1.23	MSR1
ILMN_2245087	8.04e-05	2.33e-06	1.23	MFAP2
ILMN_1718033	0.000238	8.93e-06	1.23	LYPD5
ILMN_1745964	1.04e-05	1.98e-07	1.23	IRAK2
ILMN_1693826	0.00325	0.000217	1.23	HAVCR2
ILMN_2109489	0.00832	0.000691	1.23	GZMB
ILMN_2121816	0.000187	6.55e-06	1.23	GPR137B
ILMN_1670899	0.000219	8.08e-06	1.23	FBN2
ILMN_1670134	0.0146	0.00141	1.23	FADS1
ILMN_1744293	0.0136	0.00129	1.23	CDHR5
ILMN_1737612	0.00212	0.000128	1.23	ANXA13
ILMN_1811239	0.000162	5.49e-06	1.23	ANKFN1
ILMN_2319952	8.6e-06	1.58e-07	1.22	VDR
ILMN_1694801	0.00605	0.000464	1.22	SLC39A4
ILMN_1790577	0.0354	0.00437	1.22	SLC35F2
ILMN_1667224	0.00154	8.64e-05	1.22	SLAMF8
ILMN_1760412	0.000499	2.2e-05	1.22	SHISA2
ILMN_1746699	0.000673	3.14e-05	1.22	SGO2
ILMN_2341006	0.000392	1.65e-05	1.22	SCARF2
ILMN_1684795	0.00156	8.78e-05	1.22	PRND
ILMN_1748283	3.68e-05	9.15e-07	1.22	PIM2
ILMN_2330243	0.000161	5.45e-06	1.22	NUDT1
ILMN_2219683	0.00637	0.000495	1.22	NEU4
ILMN_2051373	2.83e-05	6.6e-07	1.22	NEK2
ILMN_2214678	0.00332	0.000223	1.22	MXD1
ILMN_1701558	8.08e-05	2.35e-06	1.22	MAP1A
ILMN_1714820	0.00021	7.67e-06	1.22	ITGB1
ILMN_1723912	0.0111	0.001	1.22	IFI44L
ILMN_1664861	0.00522	0.000389	1.22	ID1
ILMN_1810274	0.000613	2.82e-05	1.22	HOXB2
ILMN_3249281	0.00592	0.000452	1.22	HOXA11-AS
ILMN_1653251	9.49e-08	7.6e-10	1.22	HIST1H1B
ILMN_1723048	0.00463	0.000336	1.22	GJC2
ILMN_2344971	2.3e-05	5.07e-07	1.22	FOXM1
ILMN_1684554	1.7e-05	3.55e-07	1.22	COL16A1
ILMN_1801443	5.27e-06	8.87e-08	1.21	TSKU
ILMN_3241657	0.00254	0.000161	1.21	TMEM204
ILMN_3239031	0.000237	8.89e-06	1.21	SYNC
ILMN_1772241	0.00149	8.25e-05	1.21	SQLE
ILMN_2367258	0.0326	0.00393	1.21	SMOX
ILMN_1804673	0.000119	3.83e-06	1.21	SLC16A4
ILMN_1808501	0.0366	0.00456	1.21	SH3KBP1
ILMN_1663042	0.0223	0.00239	1.21	SDC4
ILMN_1673455	0.00198	0.000117	1.21	RASAL2
ILMN_2414165	0.000114	3.61e-06	1.21	PRDM1
ILMN_2328378	1.54e-07	1.34e-09	1.21	OSBPL3
ILMN_1782004	0.00105	5.42e-05	1.21	NKX3-2
ILMN_3310890	0.000194	6.89e-06	1.21	MIR1206
ILMN_2064725	0.0206	0.00217	1.21	METTL7B
ILMN_2254635	0.00453	0.000326	1.21	ITGAX
ILMN_1766637	0.00985	0.000853	1.21	GLA
ILMN_1765446	4.42e-07	4.68e-09	1.21	EMP3
ILMN_2283001	0.000652	3.03e-05	1.21	DSE
ILMN_2174189	0.000578	2.62e-05	1.21	DKK1
ILMN_1666269	0.000796	3.85e-05	1.21	CTSZ
ILMN_1766675	0.0408	0.00529	1.21	CDH6
ILMN_1716446	0.000106	3.34e-06	1.21	BCL10
ILMN_1815184	5.09e-06	8.47e-08	1.21	ASPM
ILMN_1708416	0.035	0.0043	1.21	ARL6IP1
ILMN_3243312	0.00483	0.000353	1.2	ZC3H12D
ILMN_1668465	0.000577	2.62e-05	1.2	TLDC1
ILMN_2253732	0.00049	2.15e-05	1.2	ST8SIA4
ILMN_1727200	0.000865	4.28e-05	1.2	SLCO4A1
ILMN_1812688	8.18e-05	2.39e-06	1.2	SLC35F6
ILMN_1718960	3.06e-05	7.27e-07	1.2	SERPINB8
ILMN_2397028	0.000211	7.7e-06	1.2	SERPINB8
ILMN_1771051	0.00513	0.00038	1.2	RPL29
ILMN_1753312	0.000357	1.47e-05	1.2	PLXDC2
ILMN_1736729	0.00153	8.55e-05	1.2	OAS2
ILMN_1803213	0.0213	0.00226	1.2	MXRA5
ILMN_2231928	0.00059	2.69e-05	1.2	MX2
ILMN_1788099	5.06e-05	1.33e-06	1.2	LSM4
ILMN_1791545	0.0142	0.00137	1.2	KRT23
ILMN_1677018	0.00012	3.88e-06	1.2	HOXA4
ILMN_1803945	0.000142	4.72e-06	1.2	HCP5
ILMN_2204876	8.46e-05	2.49e-06	1.2	FLVCR2
ILMN_1711346	0.0141	0.00136	1.2	EGFLAM
ILMN_2230902	0.0215	0.00228	1.2	CTNNA1
ILMN_1669102	0.000797	3.86e-05	1.2	ATP5G2
ILMN_1695414	0.000194	6.9e-06	1.2	ASF1B
ILMN_1808395	0.00913	0.000774	1.2	ACAP1
ILMN_1762231	0.000897	4.47e-05	1.19	ZEB1
ILMN_2262957	0.000276	1.07e-05	1.19	WIPF1
ILMN_1661076	0.0027	0.000174	1.19	WFDC10B
ILMN_1691458	1.16e-06	1.49e-08	1.19	SYPL1
ILMN_1733443	0.00236	0.000147	1.19	SULT1B1
ILMN_3243616	0.00137	7.46e-05	1.19	SLCO4A1-AS1
ILMN_1663519	1.99e-05	4.3e-07	1.19	SLC24A3
ILMN_1790537	8.04e-05	2.33e-06	1.19	RMI2
ILMN_1749343	0.00081	3.94e-05	1.19	PLXNA4
ILMN_1714515	0.0233	0.00254	1.19	MRPS12
ILMN_1811478	0.0136	0.00129	1.19	MELTF
ILMN_1730660	0.0053	0.000397	1.19	LGALS3
ILMN_1668374	0.00948	0.000811	1.19	ITGB5
ILMN_1693941	0.00463	0.000335	1.19	IGSF9
ILMN_1732296	0.000102	3.16e-06	1.19	ID3
ILMN_1774077	4.36e-06	7.1e-08	1.19	GBP2
ILMN_2330787	0.000153	5.13e-06	1.19	FRMD6
ILMN_1722294	0.00334	0.000224	1.19	CPNE8
ILMN_1758907	0.000259	9.92e-06	1.18	UGT1A6
ILMN_1736863	0.00029	1.14e-05	1.18	TMEM140
ILMN_1676213	3.02e-05	7.14e-07	1.18	SRPX2
ILMN_1811258	0.00159	8.94e-05	1.18	RELB
ILMN_1776102	0.0419	0.00549	1.18	PSMD10
ILMN_2404903	0.000177	6.15e-06	1.18	PDPN
ILMN_1791483	0.00871	0.000732	1.18	PDE4D
ILMN_2392546	0.0213	0.00225	1.18	PAICS
ILMN_1678170	0.00544	0.000409	1.18	MME
ILMN_1718063	0.0041	0.000288	1.18	LIPA
ILMN_1698019	0.0148	0.00144	1.18	LGMN
ILMN_1772359	0.0116	0.00106	1.18	LAPTM5
ILMN_1793870	0.00198	0.000118	1.18	IL1RAP
ILMN_2166457	0.00613	0.000473	1.18	HPGD
ILMN_1801205	0.000158	5.35e-06	1.18	GPNMB
ILMN_1737308	0.0265	0.003	1.18	GLRX
ILMN_1691743	0.00429	0.000305	1.18	GJD3
ILMN_1703558	0.000377	1.56e-05	1.18	FHL3
ILMN_1700546	0.000206	7.46e-06	1.18	ELOVL6
ILMN_1652082	0.000798	3.87e-05	1.18	ELF4
ILMN_2410523	0.00979	0.000846	1.18	DDR2
ILMN_1670238	0.000319	1.28e-05	1.18	CDC45
ILMN_1695025	0.0083	0.000688	1.18	CD2
ILMN_1676548	0.011	0.000981	1.18	BZW2
ILMN_2202948	1.69e-05	3.54e-07	1.18	BUB1
ILMN_1705922	4.46e-05	1.16e-06	1.18	BAIAP2
ILMN_1707336	0.000158	5.32e-06	1.18	ARPC4
ILMN_2199658	0.00632	0.00049	1.18	ANKS4B
ILMN_2413508	0.00196	0.000117	1.18	ADGRE5
ILMN_1802888	0.00145	7.99e-05	1.17	ZNF185
ILMN_3244286	5.39e-05	1.44e-06	1.17	TANC2
ILMN_1772951	0.0032	0.000214	1.17	ST6GALNAC1
ILMN_2404906	0.00309	0.000205	1.17	SGO1
ILMN_1812795	0.00914	0.000775	1.17	RUNX1T1
ILMN_1737517	0.00202	0.000121	1.17	RPL29
ILMN_1730223	0.044	0.00585	1.17	RNF39
ILMN_1778360	5.02e-05	1.32e-06	1.17	PYGB
ILMN_1785265	0.000333	1.35e-05	1.17	PLS3
ILMN_2049766	8.83e-05	2.62e-06	1.17	NFE2L3
ILMN_1702310	0.00794	0.00065	1.17	LGR5
ILMN_1747589	0.000184	6.42e-06	1.17	HIST2H2AB
ILMN_2316386	0.000145	4.83e-06	1.17	GPBAR1
ILMN_1777233	0.00105	5.41e-05	1.17	E2F2
ILMN_3242540	0.00135	7.32e-05	1.17	CD163L1
ILMN_1802780	0.0265	0.00301	1.17	CD163L1
ILMN_1699727	0.000212	7.76e-06	1.17	BAIAP2
ILMN_1662902	0.000226	8.38e-06	1.17	ANKRD13D
ILMN_1768110	5.64e-05	1.52e-06	1.16	ZAK
ILMN_1752639	0.000676	3.16e-05	1.16	SLC25A24
ILMN_1740606	5.19e-07	5.73e-09	1.16	RTKN2
ILMN_2077905	0.0163	0.00162	1.16	PTGFRN
ILMN_2354381	0.00838	0.000697	1.16	PON2
ILMN_2162253	7.09e-05	2e-06	1.16	NMU
ILMN_1689176	0.00166	9.44e-05	1.16	NDNF
ILMN_2316540	0.0129	0.0012	1.16	MRPL11
ILMN_2358069	0.00225	0.000138	1.16	MAD1L1
ILMN_1719938	0.002	0.00012	1.16	FGF11
ILMN_1812091	0.00647	0.000506	1.16	FAM20A
ILMN_1757255	0.0342	0.00418	1.16	CDKN2A
ILMN_2233783	0.0052	0.000387	1.16	CD38
ILMN_1786176	0.0126	0.00118	1.16	CD37
ILMN_1712803	0.00101	5.16e-05	1.16	CCNB1
ILMN_1783682	0.00495	0.000364	1.16	C17orf82
ILMN_1686522	0.000411	1.74e-05	1.16	AK4
ILMN_1716370	3.36e-05	8.18e-07	1.15	TNS4
ILMN_1707124	0.0335	0.00406	1.15	TFPI
ILMN_1763520	0.000412	1.75e-05	1.15	SULT2B1
ILMN_1727671	0.000301	1.19e-05	1.15	SSH1
ILMN_1657871	0.00964	0.000829	1.15	RSAD2
ILMN_1810486	0.0134	0.00126	1.15	RAB34
ILMN_2383611	2.89e-05	6.78e-07	1.15	PTPRE
ILMN_1729915	0.000588	2.68e-05	1.15	PILRA
ILMN_1784774	0.008	0.000658	1.15	P2RY10
ILMN_1723871	0.0011	5.75e-05	1.15	OTUB1
ILMN_1738523	0.000331	1.34e-05	1.15	MYD88
ILMN_2332553	0.0106	0.000943	1.15	MSRB3
ILMN_1802654	8.16e-05	2.38e-06	1.15	GLT8D2
ILMN_1792168	0.00148	8.16e-05	1.15	GALE
ILMN_1752455	0.00867	0.000728	1.15	DOCK5
ILMN_1763265	0.00019	6.69e-06	1.15	CHMP1B
ILMN_1771652	0.0163	0.00161	1.15	BAIAP2L2
ILMN_1658472	0.0199	0.00207	1.15	APH1A
ILMN_1739645	6.17e-05	1.7e-06	1.15	ANLN
ILMN_1795325	0.0457	0.00612	1.15	ACTG2
ILMN_1798612	0.00666	0.000522	1.14	SNX20
ILMN_1759952	0.00222	0.000136	1.14	PSMA5
ILMN_1770433	9.35e-05	2.83e-06	1.14	PIK3CG
ILMN_1729851	0.0112	0.00101	1.14	ODAM
ILMN_1728071	0.00445	0.00032	1.14	KRAS
ILMN_1674034	0.0289	0.00337	1.14	H2AFY
ILMN_1795026	0.0309	0.00367	1.14	FAM189B
ILMN_1654289	0.00857	0.000717	1.14	ELK1
ILMN_2365307	0.0255	0.00286	1.14	CD276
ILMN_1797310	0.0184	0.00188	1.14	ATP6V1D
ILMN_1808383	0.0021	0.000127	1.14	ARL11
ILMN_3307651	0.00381	0.000262	1.14	APOBEC3D
ILMN_3250879	0.00114	5.96e-05	1.14	ANGPT2
ILMN_2096012	0.0107	0.000955	1.13	UHMK1
ILMN_1678054	6.62e-05	1.85e-06	1.13	TRIM21
ILMN_1758418	0.00169	9.63e-05	1.13	TNFSF13B
ILMN_1814305	0.000259	9.94e-06	1.13	SAMD9
ILMN_1712545	0.00735	0.000588	1.13	S100A3
ILMN_1677511	0.000637	2.95e-05	1.13	PTGS2
ILMN_1790778	0.00201	0.00012	1.13	PNMA2
ILMN_2367418	0.00473	0.000344	1.13	OSCAR
ILMN_2209614	0.0113	0.00102	1.13	ODF3B
ILMN_1726720	0.0193	0.002	1.13	NUSAP1
ILMN_1661708	0.00941	0.000802	1.13	LGALS7
ILMN_2220518	0.0221	0.00238	1.13	LAMTOR5
ILMN_1815168	0.0374	0.00471	1.13	HVCN1
ILMN_2353023	0.0128	0.00119	1.13	GRAP
ILMN_1696546	0.0113	0.00102	1.13	FZD1
ILMN_2329885	0.00546	0.000411	1.13	CEP170
ILMN_1737195	0.000868	4.29e-05	1.13	CENPK
ILMN_1789394	0.00163	9.23e-05	1.13	CATSPER1
ILMN_2136495	0.0169	0.00169	1.13	A2ML1
ILMN_2366967	0.023	0.00251	1.12	WT1
ILMN_3238676	0.00238	0.000149	1.12	ULBP2
ILMN_1731137	0.00165	9.37e-05	1.12	TXNDC9
ILMN_2339234	0.00834	0.000693	1.12	TRIM16
ILMN_1684346	2.42e-05	5.39e-07	1.12	TNFAIP8L1
ILMN_1800038	0.000806	3.92e-05	1.12	SDC1
ILMN_1722642	0.0122	0.00113	1.12	REEP3
ILMN_1791902	0.00174	0.0001	1.12	RARA
ILMN_1732323	0.017	0.0017	1.12	PADI1
ILMN_3236858	0.000116	3.69e-06	1.12	NYNRIN
ILMN_2376204	0.000758	3.63e-05	1.12	LTB
ILMN_1708363	0.000247	9.36e-06	1.12	LOXL1
ILMN_2126706	0.00228	0.000141	1.12	LMNB1
ILMN_1802411	0.000329	1.33e-05	1.12	ITGA1
ILMN_1670033	7.66e-06	1.36e-07	1.12	HIST1H4I
ILMN_1805216	7.16e-05	2.03e-06	1.12	GPC6
ILMN_1698243	0.0173	0.00173	1.12	GLMP
ILMN_1714349	0.0397	0.00512	1.12	GLCE
ILMN_1804351	0.000221	8.17e-06	1.12	FZD7
ILMN_1802190	0.0319	0.00382	1.12	FOXJ1
ILMN_1706643	4.38e-06	7.14e-08	1.12	COL6A3
ILMN_1705442	0.00366	0.00025	1.12	CMTM3
ILMN_2324002	4.91e-07	5.31e-09	1.12	CALD1
ILMN_2386100	0.00115	6.01e-05	1.12	BUB3
ILMN_1792489	0.0397	0.00513	1.12	ARPC2
ILMN_1802923	0.00225	0.000138	1.12	APOC2
ILMN_2260991	8.19e-08	6.46e-10	1.11	TSPO
ILMN_1812392	1.36e-06	1.8e-08	1.11	TMSB10
ILMN_1717934	0.0208	0.00219	1.11	SYT11
ILMN_2173975	0.000159	5.37e-06	1.11	RTP4
ILMN_2391400	0.02	0.00208	1.11	PITX2
ILMN_2337336	1.16e-05	2.25e-07	1.11	NECTIN2
ILMN_1784651	0.00383	0.000264	1.11	NAGA
ILMN_1692060	0.00416	0.000292	1.11	KIF21B
ILMN_1656422	0.00207	0.000125	1.11	GPR87
ILMN_1719870	0.00206	0.000124	1.11	FAM72D
ILMN_1677466	0.0204	0.00214	1.11	DUSP6
ILMN_1683121	0.0262	0.00295	1.11	CYP2C18
ILMN_1798838	0.000543	2.44e-05	1.11	CTTN
ILMN_1789007	0.00233	0.000145	1.11	APOC1
ILMN_2214144	0.00118	6.24e-05	1.1	TWSG1
ILMN_1801098	0.0439	0.00582	1.1	TSLP
ILMN_1792455	0.0127	0.00118	1.1	TMEM158
ILMN_3241665	0.0371	0.00466	1.1	SERTAD4-AS1
ILMN_2358540	0.0023	0.000142	1.1	RBMS1
ILMN_2309156	0.005	0.000368	1.1	PMEPA1
ILMN_1676384	0.00181	0.000106	1.1	PCSK6
ILMN_1774350	0.00529	0.000396	1.1	MYOZ3
ILMN_1790529	9.73e-06	1.82e-07	1.1	LUM
ILMN_1742781	0.0207	0.00218	1.1	KIRREL
ILMN_1706960	0.00395	0.000274	1.1	KIAA1217
ILMN_1746027	0.00311	0.000206	1.1	GNAL
ILMN_1790080	0.015	0.00146	1.1	GAS7
ILMN_1662950	0.0395	0.00508	1.1	EPS8L1
ILMN_1815673	0.0404	0.00523	1.1	DKK3
ILMN_2063586	0.0099	0.000859	1.1	CLIC4
ILMN_1695423	0.0166	0.00165	1.1	CD9
ILMN_2373831	0.0104	0.000916	1.1	BTN3A3
ILMN_1809344	0.0278	0.0032	1.1	BTBD10
ILMN_1786722	0.00243	0.000152	1.09	ZNF385A
ILMN_1668417	0.0176	0.00178	1.09	WIPF1
ILMN_2415617	0.000128	4.14e-06	1.09	VSTM4
ILMN_1778977	0.0155	0.00152	1.09	TYROBP
ILMN_1727689	0.000132	4.31e-06	1.09	TNFAIP2
ILMN_1682231	2.93e-05	6.89e-07	1.09	TMEM200B
ILMN_1774153	0.00487	0.000357	1.09	SPHK1
ILMN_1720996	0.046	0.00617	1.09	SLC12A2
ILMN_1743103	0.0319	0.00382	1.09	SH3PXD2A
ILMN_1705763	4.6e-06	7.54e-08	1.09	SCT
ILMN_1723358	0.031	0.00369	1.09	SCARA3
ILMN_1697554	0.0346	0.00424	1.09	SASH3
ILMN_1739792	0.000219	8.07e-06	1.09	RHOG
ILMN_2170209	0.0359	0.00446	1.09	RASD2
ILMN_1793433	0.00269	0.000173	1.09	RAB10
ILMN_2366391	0.033	0.00398	1.09	PRDX1
ILMN_2102515	0.000207	7.52e-06	1.09	PGAM4
ILMN_2412214	1.78e-05	3.76e-07	1.09	LGALS9
ILMN_1721218	0.0369	0.00461	1.09	KRT13
ILMN_1664756	0.0212	0.00225	1.09	KPNA4
ILMN_1720406	0.00982	0.00085	1.09	HOXB9
ILMN_1779648	0.00137	7.45e-05	1.09	HIST3H2A
ILMN_1749789	0.000429	1.83e-05	1.09	HIST1H1D
ILMN_1767665	0.0257	0.00289	1.09	GPX8
ILMN_1727087	0.0133	0.00125	1.09	GJA1
ILMN_1780799	0.00277	0.000179	1.09	ENPP2
ILMN_3243928	0.000748	3.57e-05	1.09	DDX60L
ILMN_3251260	0.00185	0.000108	1.09	CYP4F3
ILMN_2128770	0.000868	4.3e-05	1.09	CDR2L
ILMN_1722622	0.0363	0.00452	1.09	CD163
ILMN_1706969	0.0115	0.00104	1.09	BEND6
ILMN_1808059	0.00289	0.000189	1.09	BCAS4
ILMN_1736700	4.27e-13	6.75e-16	1.09	ALDOA
ILMN_1725387	1.31e-05	2.61e-07	1.08	TMEM200A
ILMN_1807169	0.00194	0.000115	1.08	TINAGL1
ILMN_2328776	2.96e-05	6.96e-07	1.08	STK26
ILMN_1668312	0.000171	5.91e-06	1.08	SLC2A9
ILMN_2125010	0.00601	0.000461	1.08	SKAP2
ILMN_1764723	0.00016	5.44e-06	1.08	SH3PXD2B
ILMN_1811114	0.0172	0.00173	1.08	SDS
ILMN_1720113	0.00729	0.000582	1.08	PTPRO
ILMN_1811851	0.00255	0.000162	1.08	PRRX1
ILMN_1785646	0.0139	0.00133	1.08	PMP22
ILMN_1806561	0.00899	0.00076	1.08	NR1I2
ILMN_1815479	0.000581	2.64e-05	1.08	NOP10
ILMN_1723978	0.00328	0.00022	1.08	LGALS1
ILMN_1788793	0.000639	2.96e-05	1.08	KLF8
ILMN_1781942	0.000227	8.42e-06	1.08	HMMR
ILMN_1783182	0.000891	4.43e-05	1.08	FBN1
ILMN_2392261	0.0403	0.00522	1.08	FABP6
ILMN_2412922	0.00425	0.0003	1.08	ELMSAN1
ILMN_1665696	0.00204	0.000122	1.08	EFNA4
ILMN_2276688	0.000272	1.05e-05	1.08	DIXDC1
ILMN_1712046	4.13e-06	6.66e-08	1.08	CPXM1
ILMN_1774287	0.00459	0.000331	1.08	CFB
ILMN_1714861	9.31e-05	2.82e-06	1.08	CD68
ILMN_1684217	0.00142	7.75e-05	1.08	AURKB
ILMN_2113340	7.58e-06	1.34e-07	1.08	AIM1L
ILMN_1814151	0.000395	1.67e-05	1.08	AGR2
ILMN_1731610	0.012	0.0011	1.08	ABLIM1
ILMN_1805828	2.33e-05	5.15e-07	1.07	VRK1
ILMN_1680314	0.00748	0.000603	1.07	TXN
ILMN_3251341	9.07e-09	5.1e-11	1.07	TUBA1C
ILMN_1796589	0.014	0.00133	1.07	TRIP13
ILMN_1710064	3.42e-08	2.43e-10	1.07	SDR16C5
ILMN_2274306	0.000129	4.19e-06	1.07	NRP2
ILMN_2370336	0.0256	0.00288	1.07	MS4A4A
ILMN_1681503	0.0361	0.00449	1.07	MCM2
ILMN_1663171	0.00176	0.000102	1.07	MATN3
ILMN_1695880	0.0267	0.00303	1.07	LOX
ILMN_1727248	2.41e-07	2.27e-09	1.07	INF2
ILMN_1673352	0.0308	0.00365	1.07	IFITM2
ILMN_2344662	0.00767	0.000623	1.07	HMGA2
ILMN_2190598	0.00199	0.000118	1.07	FGD6
ILMN_1733579	0.016	0.00158	1.07	EVI2A
ILMN_1685122	0.00796	0.000653	1.07	COL9A2
ILMN_1754103	0.0114	0.00103	1.07	CLDN11
ILMN_1705617	5.4e-06	9.11e-08	1.07	CFL1
ILMN_1810910	0.00686	0.000543	1.07	CFH
ILMN_2325837	0.0269	0.00306	1.07	CD3D
ILMN_2375825	0.00414	0.000291	1.07	CD37
ILMN_1690923	0.000912	4.56e-05	1.07	CAPN9
ILMN_1814686	3e-05	7.08e-07	1.07	BCO1
ILMN_1665761	0.00569	0.000432	1.07	BCL11B
ILMN_1763638	0.000995	5.06e-05	1.07	BCAR3
ILMN_2276904	0.00131	7.05e-05	1.07	ALOX15B
ILMN_1713751	0.00174	9.98e-05	1.07	ADAM19
ILMN_1726624	0.0015	8.32e-05	1.06	YPEL4
ILMN_1757604	2.19e-06	3.18e-08	1.06	TPM2
ILMN_1662619	0.0395	0.00507	1.06	TFPI
ILMN_2282641	5.32e-05	1.42e-06	1.06	TBXAS1
ILMN_2246882	0.0182	0.00186	1.06	SP140
ILMN_2116714	1.2e-05	2.34e-07	1.06	SLC39A1
ILMN_1740298	0.0183	0.00186	1.06	SIGLEC5
ILMN_3243061	0.0104	0.000919	1.06	SIGLEC14
ILMN_1692539	0.00148	8.21e-05	1.06	SH3BP1
ILMN_1765459	0.0319	0.00382	1.06	S100A13
ILMN_2366388	0.00127	6.79e-05	1.06	PRDX1
ILMN_1803318	0.0215	0.00229	1.06	PPFIA2
ILMN_1693334	0.000585	2.66e-05	1.06	P4HA1
ILMN_1731070	0.0169	0.00168	1.06	ORC6
ILMN_1674719	0.000195	6.96e-06	1.06	NID1
ILMN_1672759	0.00793	0.000649	1.06	MCU
ILMN_2101832	0.00104	5.33e-05	1.06	LAPTM4B
ILMN_1765547	0.0102	0.000892	1.06	IRF2
ILMN_1730039	0.00264	0.000169	1.06	IGSF21
ILMN_1712184	0.0338	0.00411	1.06	HIST1H3C
ILMN_1756849	0.00569	0.000432	1.06	HIST1H2AE
ILMN_1666192	0.000117	3.74e-06	1.06	DCTN5
ILMN_1713749	0.0202	0.00212	1.06	CORO1A
ILMN_3248091	0.00143	7.88e-05	1.06	C6orf223
ILMN_2301193	0.018	0.00183	1.06	ATP8B2
ILMN_1655611	0.00779	0.000634	1.05	TSHZ2
ILMN_3247223	0.0139	0.00132	1.05	TPBG
ILMN_2333774	0.00206	0.000123	1.05	TAGAP
ILMN_1651692	0.000172	5.94e-06	1.05	STK10
ILMN_2046730	0.000925	4.64e-05	1.05	S100A10
ILMN_1806403	0.0409	0.00533	1.05	RASL12
ILMN_1744268	0.000166	5.71e-06	1.05	PLEC
ILMN_1719986	0.00743	0.000597	1.05	PIK3IP1
ILMN_1660031	0.00091	4.55e-05	1.05	P2RY6
ILMN_1716988	0.000159	5.37e-06	1.05	OPN3
ILMN_1787556	0.0282	0.00326	1.05	NPC1L1
ILMN_1691264	0.00668	0.000525	1.05	NAT8B
ILMN_1743836	0.014	0.00134	1.05	MXRA7
ILMN_3241441	0.0222	0.00239	1.05	MEGF6
ILMN_1721833	0.00735	0.000588	1.05	IER5
ILMN_1744517	0.0293	0.00343	1.05	GNS
ILMN_1666932	0.000544	2.44e-05	1.05	FCGR2A
ILMN_2286253	1.14e-05	2.19e-07	1.05	COL11A1
ILMN_3251545	0.000227	8.42e-06	1.05	CHMP5
ILMN_2044645	0.0376	0.00474	1.05	CGB1
ILMN_1785268	0.000163	5.56e-06	1.05	CD58
ILMN_1717197	0.0131	0.00122	1.05	CD3G
ILMN_1660519	0.000893	4.44e-05	1.05	C3orf70
ILMN_1677603	0.00652	0.00051	1.05	C1S
ILMN_1680579	0.000141	4.67e-06	1.05	ATP2B4
ILMN_2103362	5.58e-06	9.52e-08	1.05	ARHGAP27
ILMN_1662426	0.000947	4.78e-05	1.05	AP2S1
ILMN_2329927	0.0239	0.00263	1.05	ABCG1
ILMN_1756657	0.0107	0.000945	1.04	TRIM7
ILMN_2329290	0.00129	6.89e-05	1.04	TRIM10
ILMN_2172091	3.86e-05	9.74e-07	1.04	TDO2
ILMN_2336609	9.71e-05	2.96e-06	1.04	SYTL2
ILMN_1744200	0.00896	0.000757	1.04	SRMS
ILMN_1797596	0.00427	0.000303	1.04	SPRY4
ILMN_1700695	0.0312	0.00372	1.04	SLC44A1
ILMN_1652693	0.00079	3.81e-05	1.04	SHH
ILMN_1737163	6.49e-05	1.8e-06	1.04	SH3BGRL3
ILMN_1759513	0.0472	0.00641	1.04	RND3
ILMN_1709153	0.000313	1.25e-05	1.04	PRR16
ILMN_1785198	0.0292	0.0034	1.04	POLE3
ILMN_2255382	0.000768	3.68e-05	1.04	NECTIN2
ILMN_1695404	9.56e-08	7.67e-10	1.04	LY6E
ILMN_1785402	2.45e-05	5.48e-07	1.04	LTBP1
ILMN_1734950	0.00148	8.18e-05	1.04	LOXL1
ILMN_2143155	6.55e-05	1.82e-06	1.04	KIF11
ILMN_2140559	0.00444	0.000318	1.04	IRX5
ILMN_2108699	8.84e-07	1.09e-08	1.04	IL2RA
ILMN_1653263	0.000461	1.99e-05	1.04	GPRIN1
ILMN_2251759	0.0481	0.00655	1.04	FRMD6
ILMN_1765860	0.00127	6.78e-05	1.04	DOCK11
ILMN_3245143	0.0204	0.00214	1.04	CFAP45
ILMN_1725260	0.00175	0.000101	1.04	CDC25C
ILMN_2393254	1.27e-05	2.5e-07	1.04	CAPNS1
ILMN_1767168	0.00282	0.000184	1.04	CAMK4
ILMN_1730487	8.74e-05	2.59e-06	1.04	CALD1
ILMN_1689836	0.0133	0.00126	1.04	C5AR1
ILMN_1778684	0.00926	0.000787	1.04	BRE
ILMN_3194508	0.0364	0.00454	1.04	ASAP2
ILMN_2338038	0.000907	4.53e-05	1.04	AK4
ILMN_1794782	0.000154	5.18e-06	1.04	ABCG1
ILMN_1740415	0.000122	3.92e-06	1.03	WFDC3
ILMN_1803279	0.00363	0.000247	1.03	TMED5
ILMN_1760160	0.00864	0.000725	1.03	STX1A
ILMN_1655549	0.00116	6.09e-05	1.03	SIGLEC10
ILMN_1794598	0.0268	0.00304	1.03	SCHIP1
ILMN_1653652	0.0279	0.00321	1.03	PTPRC
ILMN_2314169	0.00504	0.000373	1.03	PTHLH
ILMN_1703926	0.0337	0.0041	1.03	PTGER2
ILMN_1748651	0.0264	0.00298	1.03	PSMB3
ILMN_1803772	0.00787	0.000644	1.03	POLD4
ILMN_1805606	0.00288	0.000189	1.03	PLEKHG1
ILMN_1715508	3.68e-06	5.83e-08	1.03	NNMT
ILMN_1704305	0.00957	0.000821	1.03	NIP7
ILMN_2075603	0.0166	0.00164	1.03	MRGPRF
ILMN_1796336	0.0141	0.00135	1.03	MAP1S
ILMN_2219246	0.0434	0.00573	1.03	ITPRIPL2
ILMN_2119320	0.0115	0.00104	1.03	HIST1H4F
ILMN_1739297	0.0278	0.00319	1.03	GALNT4
ILMN_1728923	0.0331	0.004	1.03	F2RL2
ILMN_1719286	0.000802	3.89e-05	1.03	CTSA
ILMN_3187324	0.0177	0.00179	1.03	CNRIP1
ILMN_1683747	1.41e-05	2.85e-07	1.03	CD276
ILMN_1726574	0.00124	6.59e-05	1.03	CACYBP
ILMN_2325506	0.00381	0.000262	1.03	BCAS4
ILMN_2148459	0.0256	0.00287	1.03	B2M
ILMN_1789558	0.00308	0.000204	1.02	ZC2HC1A
ILMN_1674574	0.0454	0.00607	1.02	VNN1
ILMN_1787567	0.0356	0.0044	1.02	TSC22D1
ILMN_2389876	0.00101	5.19e-05	1.02	TGFB1I1
ILMN_1676408	0.0017	9.71e-05	1.02	TAGAP
ILMN_1783846	0.00779	0.000634	1.02	RAPH1
ILMN_1677404	0.0108	0.000961	1.02	RAP2A
ILMN_1667711	0.0245	0.00271	1.02	PLA2G16
ILMN_1808047	5.48e-08	4.11e-10	1.02	PHC2
ILMN_2230025	0.00653	0.000511	1.02	PDLIM3
ILMN_1776464	0.039	0.00499	1.02	PARP4
ILMN_1692295	0.00287	0.000188	1.02	MYO1G
ILMN_1770479	0.0384	0.00489	1.02	LMO7
ILMN_1654916	0.0132	0.00124	1.02	KIF7
ILMN_1766405	0.000101	3.1e-06	1.02	GOLM1
ILMN_1697559	0.00459	0.000332	1.02	G6PD
ILMN_1702056	0.000146	4.86e-06	1.02	FAM189B
ILMN_2075065	0.00327	0.000219	1.02	FADS2
ILMN_2174127	0.00563	0.000426	1.02	DCBLD2
ILMN_1728478	0.00435	0.00031	1.02	CXCL16
ILMN_1761797	2.28e-07	2.11e-09	1.02	CSTB
ILMN_1778964	0.0253	0.00282	1.02	CLIC5
ILMN_1782560	0.000364	1.5e-05	1.02	CD86
ILMN_2135339	0.00833	0.000692	1.02	C3orf70
ILMN_1796409	0.00968	0.000834	1.02	C1QB
ILMN_1734655	0.00366	0.00025	1.02	ATG9B
ILMN_2215881	0.0149	0.00145	1.02	ARHGAP11B
ILMN_1802106	0.00814	0.000672	1.02	APOBEC3G
ILMN_2148360	0.00981	0.000849	1.02	ADAM10
ILMN_1668946	0.00233	0.000145	1.01	USH1C
ILMN_1773380	0.00496	0.000364	1.01	UNC13D
ILMN_1681679	2.1e-06	3.02e-08	1.01	TSPO
ILMN_2412380	0.0113	0.00102	1.01	TSC22D1
ILMN_2240221	8.94e-05	2.67e-06	1.01	SYTL2
ILMN_1655740	0.00347	0.000235	1.01	SNAI2
ILMN_2391931	0.00543	0.000408	1.01	SLC35A2
ILMN_1675898	0.0218	0.00233	1.01	SH3BP5
ILMN_1691787	0.00786	0.000642	1.01	RAPH1
ILMN_1724708	0.00159	8.96e-05	1.01	RAB33A
ILMN_1811588	0.00175	0.000101	1.01	PML
ILMN_2117323	0.0218	0.00233	1.01	PIK3C2B
ILMN_1671557	0.00315	0.00021	1.01	PHLDA2
ILMN_1775829	0.0147	0.00142	1.01	PERP
ILMN_2387214	0.00206	0.000124	1.01	PALM
ILMN_1804461	0.00529	0.000396	1.01	MYH14
ILMN_1671158	0.00234	0.000146	1.01	MRPL13
ILMN_1783946	0.000309	1.23e-05	1.01	MRC2
ILMN_1697054	0.0243	0.00268	1.01	LRRN4CL
ILMN_1733515	0.000871	4.32e-05	1.01	LOXL3
ILMN_1719064	0.0251	0.00281	1.01	KCTD10
ILMN_1710937	2.07e-05	4.5e-07	1.01	IFI16
ILMN_1663683	0.000124	4.01e-06	1.01	HEPH
ILMN_2235975	0.00201	0.00012	1.01	FXYD5
ILMN_1741096	0.00225	0.000138	1.01	FDFT1
ILMN_3245630	0.0278	0.00319	1.01	ECSCR
ILMN_2094166	0.00102	5.22e-05	1.01	CHMP5
ILMN_1737089	0.000289	1.13e-05	1.01	CAPN5
ILMN_1709734	0.0241	0.00265	1.01	BMP4
ILMN_2085760	2.3e-06	3.35e-08	1.01	ARPC1B
ILMN_2176882	0.00069	3.24e-05	-1.01	ZNF69
ILMN_1720498	0.00396	0.000274	-1.01	TMEM120B
ILMN_1711994	4.15e-05	1.06e-06	-1.01	TCIRG1
ILMN_2095704	0.000326	1.31e-05	-1.01	SYCP2
ILMN_3248712	0.014	0.00133	-1.01	SNORD67
ILMN_3237050	0.016	0.00157	-1.01	SNORD18A
ILMN_2130218	0.00019	6.69e-06	-1.01	PAK3
ILMN_1654722	2.6e-05	5.92e-07	-1.01	MPV17L
ILMN_1681720	0.000503	2.22e-05	-1.01	LRGUK
ILMN_2288402	0.0268	0.00304	-1.01	HIP1R
ILMN_2351548	0.000234	8.76e-06	-1.01	FAIM
ILMN_1795822	8.02e-05	2.32e-06	-1.01	DIS3L
ILMN_1662328	8.64e-09	4.78e-11	-1.01	CNNM3
ILMN_1728230	0.000472	2.05e-05	-1.02	ZNF30
ILMN_1694486	0.00276	0.000178	-1.02	TCIRG1
ILMN_1751072	0.000163	5.57e-06	-1.02	SRPRB
ILMN_3311085	0.000235	8.81e-06	-1.02	SNORD114-2
ILMN_1674593	0.00161	9.08e-05	-1.02	SIGLEC11
ILMN_1712231	0.000206	7.46e-06	-1.02	SH3YL1
ILMN_1692936	0.0101	0.000881	-1.02	OVOL1
ILMN_1680344	0.000861	4.25e-05	-1.02	MYOM1
ILMN_1721774	0.0481	0.00657	-1.02	MPP7
ILMN_1664165	3.86e-05	9.7e-07	-1.02	IZUMO1
ILMN_1712515	0.00176	0.000102	-1.02	FOXO3
ILMN_1791250	0.0149	0.00145	-1.02	EDA
ILMN_1717975	0.00735	0.000588	-1.02	CYHR1
ILMN_1675237	0.000137	4.51e-06	-1.02	CPEB2-AS1
ILMN_1749071	0.00566	0.000428	-1.02	CNIH3
ILMN_1707551	8.51e-06	1.56e-07	-1.02	AFMID
ILMN_2106002	0.00971	0.000838	-1.02	ACBD7
ILMN_1697211	0.00329	0.000221	-1.03	UBA5
ILMN_1654629	0.0429	0.00566	-1.03	TMEM175
ILMN_3242448	0.0174	0.00175	-1.03	SNORA11D
ILMN_2175236	0.00038	1.58e-05	-1.03	PRLR
ILMN_3310785	0.000154	5.15e-06	-1.03	MIR1299
ILMN_1779536	0.00175	0.0001	-1.03	KIZ
ILMN_1779639	0.00398	0.000276	-1.03	IRAK1BP1
ILMN_1709194	0.00156	8.76e-05	-1.03	GPR155
ILMN_1810716	0.0268	0.00305	-1.03	GFRA3
ILMN_2041161	1.8e-06	2.52e-08	-1.03	DENND4A
ILMN_2215382	2.06e-06	2.97e-08	-1.03	DDX51
ILMN_1656045	0.012	0.0011	-1.03	CELF6
ILMN_3306950	0.00012	3.86e-06	-1.03	CDK10
ILMN_3248676	0.00104	5.37e-05	-1.03	CBWD3
ILMN_2389445	2.62e-07	2.48e-09	-1.03	ARHGEF10L
ILMN_1689770	2.92e-05	6.86e-07	-1.03	ARHGEF10L
ILMN_1800008	0.0189	0.00194	-1.03	ACAT1
ILMN_1753683	0.000106	3.31e-06	-1.04	SOCS7
ILMN_3234984	0.0199	0.00207	-1.04	SNORD105
ILMN_1753345	0.044	0.00583	-1.04	SCAMP5
ILMN_2097185	7.67e-06	1.37e-07	-1.04	PUS3
ILMN_1775170	0.000322	1.29e-05	-1.04	MT1X
ILMN_1736972	1.69e-06	2.34e-08	-1.04	GKAP1
ILMN_3271098	0.0153	0.0015	-1.04	EVA1A
ILMN_1740231	0.000329	1.33e-05	-1.04	ELMO1
ILMN_1795582	0.00124	6.62e-05	-1.04	CHRD
ILMN_1730332	0.0248	0.00276	-1.04	CASP7
ILMN_1667452	0.00491	0.00036	-1.05	ZNRF2P1
ILMN_3246529	0.0026	0.000166	-1.05	SNORD93
ILMN_3310050	0.0141	0.00135	-1.05	SNORD114-30
ILMN_3309428	0.0011	5.74e-05	-1.05	SNORD114-17
ILMN_3310905	0.0142	0.00136	-1.05	SNORD113-2
ILMN_3244592	0.0124	0.00115	-1.05	SNORA68
ILMN_1787326	0.028	0.00324	-1.05	SNORA65
ILMN_1749077	9.88e-07	1.23e-08	-1.05	RIC3
ILMN_1755405	0.000103	3.18e-06	-1.05	PGAP2
ILMN_1666967	6.53e-05	1.82e-06	-1.05	MPC1
ILMN_1722771	0.00112	5.88e-05	-1.05	LDHD
ILMN_1684945	0.0463	0.00623	-1.05	KCNJ3
ILMN_2235785	0.00703	0.000558	-1.05	KCNH6
ILMN_1715324	0.00162	9.18e-05	-1.05	HSD17B8
ILMN_1652797	0.00485	0.000355	-1.05	FAM174B
ILMN_1663786	3.27e-05	7.91e-07	-1.05	EPB41
ILMN_2186108	0.000352	1.44e-05	-1.05	DGCR6
ILMN_1805603	0.000177	6.16e-06	-1.05	CFAP43
ILMN_1693218	0.00064	2.97e-05	-1.05	ART3
ILMN_1787265	4.12e-05	1.05e-06	-1.06	ZNF503
ILMN_2362232	0.0276	0.00316	-1.06	ZNF331
ILMN_1806809	3.7e-05	9.23e-07	-1.06	ZNF189
ILMN_1680430	0.00222	0.000136	-1.06	TSGA10
ILMN_1793410	0.00396	0.000274	-1.06	SNTB1
ILMN_1732410	0.0354	0.00437	-1.06	SLC16A9
ILMN_2291871	0.00497	0.000366	-1.06	GLIS3
ILMN_1763657	0.000554	2.5e-05	-1.06	CXXC4
ILMN_1741131	0.00138	7.5e-05	-1.06	CHRNB1
ILMN_1786041	0.0022	0.000135	-1.06	ASB9
ILMN_1810881	0.000465	2.02e-05	-1.06	ASB16
ILMN_2281186	0.0072	0.000574	-1.06	ARHGEF28
ILMN_2354269	0.000505	2.23e-05	-1.07	ZC2HC1C
ILMN_1803256	2.21e-06	3.22e-08	-1.07	STOX2
ILMN_1667429	0.0037	0.000253	-1.07	SLC25A20
ILMN_2397795	0.000153	5.11e-06	-1.07	SLAIN1
ILMN_1760332	3.72e-06	5.91e-08	-1.07	PIGL
ILMN_1744815	0.000133	4.37e-06	-1.07	NECTIN1
ILMN_1694472	0.00226	0.000139	-1.07	GCK
ILMN_1787345	0.000256	9.76e-06	-1.07	FKBP11
ILMN_1788377	0.00711	0.000566	-1.07	COL27A1
ILMN_1748844	0.000326	1.31e-05	-1.07	CNKSR3
ILMN_1780188	5.05e-10	1.85e-12	-1.07	B3GALNT2
ILMN_2310909	9.85e-05	3.01e-06	-1.07	ATP2A3
ILMN_1805668	0.000482	2.11e-05	-1.08	ZNF486
ILMN_1759117	0.00546	0.00041	-1.08	XK
ILMN_1808956	8.62e-06	1.58e-07	-1.08	TMEM266
ILMN_1728496	5.02e-06	8.33e-08	-1.08	SYT9
ILMN_1732166	9.14e-05	2.74e-06	-1.08	SDHAP3
ILMN_1750511	3.66e-06	5.77e-08	-1.08	NT5C3B
ILMN_1673535	0.00185	0.000108	-1.08	MYLK4
ILMN_1691355	3.09e-05	7.35e-07	-1.08	HHATL
ILMN_1684690	0.000146	4.87e-06	-1.08	HDAC11
ILMN_1719993	0.00168	9.56e-05	-1.08	GOLGA6L9
ILMN_1805995	2.1e-05	4.58e-07	-1.09	STPG2
ILMN_1774973	0.00147	8.15e-05	-1.09	SNORD21
ILMN_2327947	0.000434	1.86e-05	-1.09	SLC25A25
ILMN_1702218	5.57e-06	9.5e-08	-1.09	POLI
ILMN_1706051	4.88e-06	8.03e-08	-1.09	PLD5
ILMN_2304404	0.000311	1.24e-05	-1.09	PBLD
ILMN_1801109	1.41e-06	1.87e-08	-1.09	NAA16
ILMN_3248132	0.00462	0.000334	-1.09	LOC100129534
ILMN_2402600	0.000391	1.64e-05	-1.09	GLIS3
ILMN_1685767	4.57e-05	1.19e-06	-1.09	FAM3B
ILMN_2120072	0.000429	1.83e-05	-1.09	FAM161A
ILMN_1787324	5.02e-06	8.32e-08	-1.09	ENKD1
ILMN_1705477	0.000726	3.44e-05	-1.09	CAMK1D
ILMN_1665871	3.65e-05	9.04e-07	-1.09	ANGEL1
ILMN_1741313	2.4e-07	2.24e-09	-1.1	ZNF782
ILMN_1656192	0.000662	3.08e-05	-1.1	ZNF704
ILMN_1703060	8.91e-05	2.66e-06	-1.1	SYT15
ILMN_1780924	7.57e-08	5.82e-10	-1.1	SLC43A1
ILMN_2237428	0.00464	0.000336	-1.1	SCD5
ILMN_1789384	0.00181	0.000106	-1.1	QSOX2
ILMN_1677270	3.28e-07	3.23e-09	-1.1	OR4D5
ILMN_1698770	8.32e-06	1.51e-07	-1.1	NADK2
ILMN_3307897	0.00079	3.81e-05	-1.1	MECOM
ILMN_1655194	8.18e-05	2.39e-06	-1.1	JADE1
ILMN_1666175	1.23e-05	2.41e-07	-1.1	IL22RA1
ILMN_1787257	2.09e-05	4.54e-07	-1.1	GLP1R
ILMN_1701643	0.00421	0.000297	-1.1	GDPD5
ILMN_1700733	1.12e-08	6.68e-11	-1.1	FAM214A
ILMN_1709474	0.0129	0.00121	-1.1	ALMS1
ILMN_3240306	0.00457	0.00033	-1.11	SNORD51
ILMN_3308753	0.00403	0.000281	-1.11	SNORD114-1
ILMN_1780153	0.000142	4.72e-06	-1.11	QTRT1
ILMN_1717707	0.00271	0.000175	-1.11	PSTK
ILMN_2126957	3.96e-08	2.89e-10	-1.11	NOMO1
ILMN_1739601	0.00504	0.000372	-1.11	MSI1
ILMN_3308020	0.000261	1e-05	-1.11	MIR548J
ILMN_2055036	0.000162	5.49e-06	-1.11	KLHDC1
ILMN_1683858	5.01e-05	1.32e-06	-1.11	EFCAB6
ILMN_2246894	3.11e-06	4.79e-08	-1.11	EDF1
ILMN_1776857	0.000995	5.07e-05	-1.11	AQP1
ILMN_2096372	0.000106	3.34e-06	-1.11	ALDH1A1
ILMN_1753388	0.0036	0.000245	-1.11	ABCA10
ILMN_1789112	0.0482	0.00659	-1.12	TMEM145
ILMN_1732023	0.00827	0.000685	-1.12	PRDM7
ILMN_2339955	0.00181	0.000106	-1.12	NR4A2
ILMN_1704101	0.0191	0.00197	-1.12	HSF4
ILMN_2340599	0.00168	9.56e-05	-1.12	EPHA8
ILMN_1693762	0.00233	0.000145	-1.12	DRC3
ILMN_1695110	7.61e-07	9.11e-09	-1.12	BCAT2
ILMN_1747824	0.00059	2.69e-05	-1.13	ZNF85
ILMN_1727300	3.01e-05	7.11e-07	-1.13	ZNF444
ILMN_1698179	0.00162	9.13e-05	-1.13	TAGLN3
ILMN_3238613	0.000721	3.41e-05	-1.13	SNORA26
ILMN_1719660	0.0179	0.00182	-1.13	SMPDL3B
ILMN_1708159	0.000177	6.17e-06	-1.13	PICK1
ILMN_3234089	0.000814	3.97e-05	-1.13	N4BP2L2
ILMN_1697812	7.75e-06	1.38e-07	-1.13	MNX1
ILMN_2099487	4.59e-05	1.19e-06	-1.13	LYRM9
ILMN_3248668	0.00103	5.29e-05	-1.13	KRTAP5-AS1
ILMN_1692394	0.013	0.00122	-1.13	KIAA1024
ILMN_1796229	4.19e-06	6.78e-08	-1.13	FGFR1
ILMN_1766983	0.0292	0.00341	-1.13	FBXW11
ILMN_2291092	0.0137	0.0013	-1.13	FAM13A
ILMN_1702973	0.00817	0.000675	-1.13	EVA1A
ILMN_1764188	0.000251	9.54e-06	-1.13	CCDC171
ILMN_1814369	0.000243	9.15e-06	-1.13	C21orf62
ILMN_1782845	0.0192	0.00199	-1.14	SPTB
ILMN_1694367	0.00566	0.000429	-1.14	SNORD35B
ILMN_1678095	0.00052	2.32e-05	-1.14	SMPDL3B
ILMN_1687958	0.00267	0.000172	-1.14	SLC25A22
ILMN_1709247	0.00537	0.000403	-1.14	PPP2R1B
ILMN_2404688	4.22e-10	1.47e-12	-1.14	NUPR1
ILMN_1784783	0.0297	0.00349	-1.14	NME5
ILMN_2073289	0.00863	0.000723	-1.14	MTSS1
ILMN_1815148	1.91e-06	2.7e-08	-1.14	MAN2A2
ILMN_1803412	0.00277	0.000179	-1.14	LARGE1
ILMN_2165369	1.7e-06	2.36e-08	-1.14	HIST1H4B
ILMN_1694166	0.000254	9.66e-06	-1.14	HIST1H2AA
ILMN_3247139	0.00255	0.000162	-1.14	C17orf96
ILMN_1666380	0.000185	6.49e-06	-1.15	STARD13
ILMN_1739086	0.000194	6.92e-06	-1.15	SNORD43
ILMN_3236942	0.000989	5.02e-05	-1.15	SNORA5A
ILMN_1701681	9.26e-06	1.72e-07	-1.15	SEC11C
ILMN_1776519	0.0014	7.66e-05	-1.15	RAP1GAP
ILMN_1810011	0.00709	0.000564	-1.15	PTPDC1
ILMN_1680617	2.49e-05	5.61e-07	-1.15	PLXNA2
ILMN_3234124	2.37e-07	2.2e-09	-1.15	OGFOD3
ILMN_1738268	0.00431	0.000306	-1.15	IP6K3
ILMN_2394438	0.00227	0.00014	-1.15	FAM177A1
ILMN_1761131	0.0481	0.00656	-1.15	ECI2
ILMN_2406106	0.00216	0.000131	-1.15	CACNB2
ILMN_1795838	0.0014	7.64e-05	-1.15	C4orf19
ILMN_2374865	0.0277	0.00318	-1.15	ATF3
ILMN_1670193	0.00216	0.000131	-1.15	ACY3
ILMN_1694514	0.000772	3.71e-05	-1.16	ZDHHC11
ILMN_1740493	0.000227	8.41e-06	-1.16	TRAF5
ILMN_1786498	0.000635	2.94e-05	-1.16	STARD13
ILMN_3247148	0.0119	0.00109	-1.16	SNORD76
ILMN_3241937	0.0239	0.00263	-1.16	SNORA71D
ILMN_2410938	0.00473	0.000344	-1.16	SMOC1
ILMN_2303669	0.00426	0.000301	-1.16	SLC4A8
ILMN_2073279	0.0225	0.00242	-1.16	SIM1
ILMN_2399392	0.00281	0.000182	-1.16	SIL1
ILMN_1763989	1.16e-06	1.48e-08	-1.16	SEC63
ILMN_2379626	0.000369	1.52e-05	-1.16	PCDH9
ILMN_1677920	0.0141	0.00135	-1.16	LTF
ILMN_1718633	0.00146	8.06e-05	-1.16	LRP5L
ILMN_1775114	0.000678	3.17e-05	-1.16	ENTPD3
ILMN_1737992	1.7e-10	5.2e-13	-1.16	CRAT
ILMN_2261519	0.0274	0.00314	-1.16	AIRE
ILMN_1763852	1.3e-05	2.57e-07	-1.16	ACACB
ILMN_1657302	7.15e-05	2.03e-06	-1.17	SULT1A1
ILMN_1663327	0.00164	9.26e-05	-1.17	SOX6
ILMN_1776077	7.16e-07	8.33e-09	-1.17	SF1
ILMN_1716803	0.00149	8.24e-05	-1.17	RALYL
ILMN_2052373	0.0229	0.00248	-1.17	RAB17
ILMN_2138249	0.00196	0.000117	-1.17	PRSS45
ILMN_2337880	0.00267	0.000172	-1.17	NRG2
ILMN_1782273	9.44e-09	5.4e-11	-1.17	N4BP2
ILMN_1752548	9.84e-05	3.01e-06	-1.17	KRTDAP
ILMN_1678191	1.88e-05	3.98e-07	-1.17	GDF10
ILMN_2152178	1.27e-05	2.5e-07	-1.17	FAN1
ILMN_1700888	6.72e-07	7.73e-09	-1.17	ENPP1
ILMN_1809208	0.00452	0.000325	-1.17	CAMSAP3
ILMN_2129886	0.0173	0.00173	-1.17	ABCA8
ILMN_1657679	5.97e-06	1.03e-07	-1.18	VAV3
ILMN_2135175	0.00216	0.000131	-1.18	SNORD36A
ILMN_1724009	3.05e-06	4.67e-08	-1.18	SETD6
ILMN_3250850	0.000301	1.19e-05	-1.18	RFESD
ILMN_2390544	0.000471	2.05e-05	-1.18	FAM149A
ILMN_2263466	0.000328	1.32e-05	-1.18	ACADVL
ILMN_2104295	0.000379	1.57e-05	-1.19	TMEM178A
ILMN_1716407	0.0208	0.0022	-1.19	SORBS2
ILMN_1714577	0.000188	6.6e-06	-1.19	OGDHL
ILMN_3249172	0.00118	6.2e-05	-1.19	LINC00092
ILMN_2358760	4.96e-05	1.3e-06	-1.19	HPN
ILMN_1709681	0.0483	0.0066	-1.19	GABRB3
ILMN_1708107	0.0492	0.00677	-1.19	DPT
ILMN_1689932	0.000485	2.12e-05	-1.19	DPH7
ILMN_1652975	0.000254	9.66e-06	-1.19	DLK1
ILMN_1720898	0.000346	1.41e-05	-1.19	C10orf62
ILMN_1667564	0.000138	4.54e-06	-1.19	ALDH3A2
ILMN_1711199	0.001	5.12e-05	-1.2	ZNF331
ILMN_2402581	0.00154	8.65e-05	-1.2	MYZAP
ILMN_1751016	2.63e-05	6e-07	-1.2	LONRF2
ILMN_2149952	0.0142	0.00137	-1.2	LINC01567
ILMN_2207505	0.00011	3.47e-06	-1.2	LEP
ILMN_2312304	4.67e-07	5.01e-09	-1.2	INTS6
ILMN_2224171	2.33e-12	4.21e-15	-1.2	HUNK
ILMN_1697069	0.014	0.00134	-1.2	CSF3
ILMN_2361862	7.61e-05	2.17e-06	-1.21	VLDLR
ILMN_1775587	0.00781	0.000637	-1.21	STX19
ILMN_1656233	0.00994	0.000864	-1.21	SPDYE8P
ILMN_3238707	0.000101	3.12e-06	-1.21	SNORA8
ILMN_1690096	0.0167	0.00166	-1.21	PPP1R1B
ILMN_2294653	0.00841	0.0007	-1.21	PDE5A
ILMN_1770938	3.68e-05	9.16e-07	-1.21	PAK5
ILMN_1795119	0.0279	0.00322	-1.21	MYH3
ILMN_1803211	0.0111	0.000993	-1.21	FBXO2
ILMN_1727183	0.000607	2.78e-05	-1.22	ZNF763
ILMN_2278653	2.22e-05	4.86e-07	-1.22	ZNF493
ILMN_1680403	0.000107	3.36e-06	-1.22	SSR4
ILMN_3236149	0.00226	0.000139	-1.22	SNORD58A
ILMN_1672608	0.00956	0.00082	-1.22	PLPP3
ILMN_1701562	0.00107	5.52e-05	-1.22	PKHD1
ILMN_1790885	0.00229	0.000141	-1.22	KCNK10
ILMN_1675756	0.000962	4.87e-05	-1.22	KCNJ15
ILMN_1686989	0.000418	1.77e-05	-1.22	INSIG1
ILMN_1674498	9.38e-05	2.85e-06	-1.22	FAM221A
ILMN_1743373	0.000261	1e-05	-1.22	DLL1
ILMN_2312194	0.00133	7.18e-05	-1.22	CYB5A
ILMN_1689111	0.000606	2.78e-05	-1.22	CXCL12
ILMN_1721628	0.00135	7.31e-05	-1.22	C19orf73
ILMN_1687303	0.000171	5.91e-06	-1.22	ACAD10
ILMN_1742824	2.77e-05	6.4e-07	-1.23	SPATA13
ILMN_1653125	0.000254	9.66e-06	-1.23	PER1
ILMN_2110908	0.00393	0.000272	-1.23	MYC
ILMN_1719876	0.00205	0.000123	-1.23	KIAA1804
ILMN_3241087	1.13e-06	1.44e-08	-1.23	INPP5J
ILMN_1772446	0.00407	0.000285	-1.23	FAM222A
ILMN_1678484	0.00111	5.79e-05	-1.23	CBY1
ILMN_1687848	0.0332	0.00402	-1.23	C7
ILMN_1758523	0.000236	8.85e-06	-1.23	ABCA3
ILMN_1726512	0.000108	3.4e-06	-1.24	ZSCAN2
ILMN_2139052	0.00039	1.63e-05	-1.24	ZKSCAN1
ILMN_1776848	3.49e-06	5.46e-08	-1.24	ZFYVE9
ILMN_1675106	1.01e-08	5.87e-11	-1.24	YIPF2
ILMN_2257607	3.05e-06	4.65e-08	-1.24	STARD13
ILMN_1698726	0.000206	7.46e-06	-1.24	SLC25A27
ILMN_1901419	0.0363	0.00452	-1.24	RNU11
ILMN_1741600	0.000281	1.1e-05	-1.24	PFKFB1
ILMN_1782305	0.000462	2e-05	-1.24	NR4A2
ILMN_2061435	0.00325	0.000217	-1.24	MEG3
ILMN_1795499	0.000124	3.99e-06	-1.24	MAML3
ILMN_1740960	0.00532	0.000398	-1.24	MACROD1
ILMN_1694913	1.38e-08	8.66e-11	-1.24	LMO3
ILMN_2201580	0.018	0.00183	-1.24	GSTM2
ILMN_1686573	0.0171	0.00171	-1.24	DEFB1
ILMN_3177532	0.00295	0.000194	-1.24	CECR5-AS1
ILMN_1760047	2.48e-05	5.57e-07	-1.25	VAX2
ILMN_1745668	0.000138	4.55e-06	-1.25	SYNE2
ILMN_1674098	5.04e-05	1.33e-06	-1.25	SORBS2
ILMN_3239704	0.000703	3.31e-05	-1.25	SNORA11B
ILMN_1728844	4.99e-07	5.44e-09	-1.25	PTPRN2
ILMN_3240586	6.14e-05	1.68e-06	-1.25	PLD6
ILMN_1723969	6e-07	6.74e-09	-1.25	PLCB1
ILMN_3311060	0.000165	5.64e-06	-1.25	MIR375
ILMN_3308713	0.0017	9.73e-05	-1.25	MIR370
ILMN_1721801	4.3e-07	4.5e-09	-1.25	GDAP1
ILMN_1713266	0.0148	0.00143	-1.25	FAM46C
ILMN_2401253	1.9e-05	4.07e-07	-1.25	FAM13A
ILMN_1670779	0.000132	4.31e-06	-1.25	DPEP1
ILMN_1678403	0.00131	7.03e-05	-1.26	TMEM178A
ILMN_2060212	0.000248	9.39e-06	-1.26	TBC1D24
ILMN_3244640	0.0107	0.000951	-1.26	SNORD96A
ILMN_3235264	2.05e-05	4.43e-07	-1.26	SNORA48
ILMN_3241884	0.0111	0.000996	-1.26	SNORA15
ILMN_1660413	0.000823	4.02e-05	-1.26	SGK2
ILMN_3240069	0.0342	0.00418	-1.26	SCARNA4
ILMN_3241373	0.000118	3.78e-06	-1.26	SCARNA18
ILMN_1704537	1.25e-06	1.62e-08	-1.26	PHGDH
ILMN_1794707	0.000395	1.66e-05	-1.26	PGGHG
ILMN_3311045	1.04e-06	1.31e-08	-1.26	MIR216A
ILMN_1798581	0.00427	0.000302	-1.26	MCM8
ILMN_1732720	2.54e-06	3.74e-08	-1.26	LENG9
ILMN_1749996	0.000101	3.1e-06	-1.26	KCNN2
ILMN_1804569	2.87e-06	4.34e-08	-1.26	GAS2
ILMN_1730201	0.000101	3.12e-06	-1.26	DTNA
ILMN_1780197	0.000968	4.9e-05	-1.27	TBC1D24
ILMN_2165762	0.00421	0.000297	-1.27	SNORD34
ILMN_2096623	0.00527	0.000393	-1.27	SLITRK1
ILMN_1755720	0.000556	2.51e-05	-1.27	SLC2A2
ILMN_2113490	1.94e-11	4.63e-14	-1.27	NTN4
ILMN_1664646	3.59e-06	5.66e-08	-1.27	NSUN6
ILMN_1657497	0.000189	6.68e-06	-1.27	KIAA0319
ILMN_3239435	0.000348	1.42e-05	-1.27	HTT
ILMN_1712469	8.67e-08	6.89e-10	-1.27	GOLGA8A
ILMN_1806306	4.27e-05	1.1e-06	-1.28	SV2B
ILMN_1741944	0.0158	0.00155	-1.28	SNORD38B
ILMN_2268381	1.92e-09	8.62e-12	-1.28	RRBP1
ILMN_1666832	0.00452	0.000325	-1.28	RAP1GAP2
ILMN_1784447	1.05e-06	1.32e-08	-1.28	PLCE1
ILMN_1669474	0.0107	0.000955	-1.28	PCDHA10
ILMN_1767657	0.000159	5.37e-06	-1.28	MAT1A
ILMN_2159859	0.000728	3.45e-05	-1.28	LYSMD4
ILMN_1761820	0.000745	3.55e-05	-1.28	EDARADD
ILMN_1731064	0.0195	0.00202	-1.28	COQ8A
ILMN_2215824	0.00241	0.000151	-1.28	ANKRD20A1
ILMN_2112829	0.000217	7.98e-06	-1.28	ANKAR
ILMN_1687609	7.98e-06	1.43e-07	-1.28	AATK
ILMN_3237839	0.0067	0.000526	-1.29	ZNF674
ILMN_3249142	0.000537	2.41e-05	-1.29	ZG16
ILMN_2305407	0.00286	0.000187	-1.29	ZBTB16
ILMN_2302983	0.00347	0.000235	-1.29	TRPM3
ILMN_3246391	4.07e-05	1.04e-06	-1.29	SNORD52
ILMN_3245599	3.19e-06	4.93e-08	-1.29	SNORD109A
ILMN_3236955	2.61e-05	5.94e-07	-1.29	SNORA11
ILMN_1759631	7.92e-06	1.42e-07	-1.29	SERPINA4
ILMN_3236010	0.0415	0.00542	-1.29	SCARNA11
ILMN_2352881	0.000499	2.2e-05	-1.29	NR6A1
ILMN_1663145	6.51e-09	3.44e-11	-1.29	NOMO3
ILMN_3308723	7.87e-06	1.41e-07	-1.29	MIR148A
ILMN_1765212	8.62e-08	6.82e-10	-1.29	LARP1B
ILMN_1693985	3.95e-05	1e-06	-1.29	JPH1
ILMN_1653814	2.94e-11	7.39e-14	-1.29	HBBP1
ILMN_1708428	8.9e-05	2.66e-06	-1.29	GPR150
ILMN_1669465	0.00222	0.000136	-1.29	EFCAB6
ILMN_1743204	6.27e-07	7.09e-09	-1.29	DUSP8
ILMN_1659800	0.00763	0.000619	-1.29	BCL11A
ILMN_2386444	0.00041	1.73e-05	-1.29	ANGPTL4
ILMN_1668839	1.23e-07	1.03e-09	-1.29	ACOX1
ILMN_2256687	1.91e-05	4.1e-07	-1.3	SOX6
ILMN_3246515	0.000335	1.35e-05	-1.3	SMIM10L2A
ILMN_2124241	4.83e-05	1.26e-06	-1.3	MUM1L1
ILMN_2143427	0.000385	1.61e-05	-1.3	LGSN
ILMN_2358886	0.0401	0.00518	-1.3	EDN3
ILMN_3240765	0.00127	6.76e-05	-1.3	ANO3
ILMN_2111229	1.9e-05	4.05e-07	-1.31	TSPOAP1
ILMN_3238972	0.000149	4.97e-06	-1.31	SNORD123
ILMN_3241993	0.0174	0.00175	-1.31	SNORA7A
ILMN_1748090	3.94e-05	9.97e-07	-1.31	SLC2A11
ILMN_1693717	0.000535	2.39e-05	-1.31	RPH3AL
ILMN_1814719	0.00437	0.000312	-1.31	RBP4
ILMN_2343264	0.00807	0.000665	-1.31	PRDM16
ILMN_1680618	2.99e-05	7.05e-07	-1.31	MYC
ILMN_1722073	5.22e-05	1.39e-06	-1.31	MLXIPL
ILMN_1687331	0.0135	0.00127	-1.31	KCNMB2
ILMN_1812096	2.72e-05	6.23e-07	-1.31	CADM4
ILMN_2045800	0.000912	4.56e-05	-1.31	C11orf65
ILMN_2352009	1.79e-08	1.17e-10	-1.31	ACADVL
ILMN_1695061	7.42e-07	8.78e-09	-1.32	UNC79
ILMN_3245672	0.00473	0.000344	-1.32	SNORD84
ILMN_1807689	0.000274	1.06e-05	-1.32	PKNOX2
ILMN_1765061	0.000441	1.89e-05	-1.32	OXER1
ILMN_1761181	0.00102	5.21e-05	-1.32	NOL9
ILMN_2096970	0.00194	0.000115	-1.32	MYO3B
ILMN_2347068	1.53e-08	9.74e-11	-1.32	MKNK2
ILMN_3234892	2.31e-06	3.37e-08	-1.32	MARCH11
ILMN_2056815	2.42e-05	5.41e-07	-1.32	LINGO4
ILMN_3238428	0.000615	2.83e-05	-1.32	FAHD2CP
ILMN_1693961	0.000256	9.78e-06	-1.32	CATSPER3
ILMN_1749001	1.81e-08	1.19e-10	-1.32	ABCA5
ILMN_1768425	0.00524	0.000391	-1.33	TF
ILMN_1750785	0.00176	0.000102	-1.33	SYTL1
ILMN_3244154	0.000177	6.18e-06	-1.33	SNORA84
ILMN_3305938	0.000194	6.93e-06	-1.33	SGK1
ILMN_1771126	7.53e-07	8.95e-09	-1.33	RORC
ILMN_1712112	0.000206	7.43e-06	-1.33	RCAN1
ILMN_1733627	0.000141	4.68e-06	-1.33	NEDD4L
ILMN_3246405	0.00142	7.79e-05	-1.33	LINC00930
ILMN_2348367	1.41e-09	6.07e-12	-1.33	FGFRL1
ILMN_1711514	0.000726	3.44e-05	-1.33	COCH
ILMN_3241941	0.0173	0.00174	-1.34	SCARNA2
ILMN_1731568	1.23e-08	7.43e-11	-1.34	RAB3D
ILMN_1700985	3.79e-05	9.47e-07	-1.34	PRDM5
ILMN_1800468	8.34e-06	1.51e-07	-1.34	KLKB1
ILMN_1778425	1.23e-07	1.04e-09	-1.34	DPP10
ILMN_3237439	0.00189	0.000111	-1.35	SNORD61
ILMN_3248562	0.00417	0.000293	-1.35	SNORD49A
ILMN_3241036	0.00106	5.47e-05	-1.35	SNORA14A
ILMN_1775615	0.000272	1.05e-05	-1.35	PRSS50
ILMN_1685982	1.3e-05	2.58e-07	-1.35	PDGFA
ILMN_1702822	3.7e-05	9.23e-07	-1.35	NTRK2
ILMN_1651336	2.23e-09	1.04e-11	-1.35	MLYCD
ILMN_2054121	0.00015	5.01e-06	-1.35	CLPSL2
ILMN_1797554	2.16e-05	4.71e-07	-1.36	ZNF189
ILMN_3234756	0.000617	2.85e-05	-1.36	SNORD6
ILMN_3240418	0.000358	1.47e-05	-1.36	SNORA72
ILMN_2325056	0.00865	0.000726	-1.36	SLC29A4
ILMN_1696380	0.0181	0.00185	-1.36	GHRL
ILMN_2090641	3.14e-05	7.55e-07	-1.36	FAM110C
ILMN_2353862	7.13e-05	2.02e-06	-1.36	DRC3
ILMN_1735006	4.56e-08	3.39e-10	-1.36	ATG2B
ILMN_2272412	9.69e-08	7.8e-10	-1.37	TRPV6
ILMN_3246206	0.00321	0.000214	-1.37	SNORA79
ILMN_1770905	1.94e-05	4.17e-07	-1.37	SHC3
ILMN_2363027	0.00597	0.000457	-1.37	RAD51
ILMN_1741674	0.0019	0.000112	-1.37	PPP1R9A
ILMN_1800332	0.000274	1.06e-05	-1.37	NGB
ILMN_1737041	0.00396	0.000275	-1.37	HABP2
ILMN_1691584	0.0103	0.000899	-1.37	F8
ILMN_1723886	0.000288	1.13e-05	-1.38	ZFP2
ILMN_1652223	1.98e-05	4.25e-07	-1.38	WDR91
ILMN_1791123	0.0393	0.00505	-1.38	TMPRSS2
ILMN_3240595	0.000385	1.61e-05	-1.38	SNORD37
ILMN_2132082	8.24e-06	1.49e-07	-1.38	SNORD107
ILMN_1704063	0.00173	9.93e-05	-1.38	KCNH3
ILMN_1734346	4.13e-05	1.06e-06	-1.38	IZUMO4
ILMN_3243175	0.0104	0.000919	-1.38	GOLGA6L6
ILMN_1781390	0.000102	3.14e-06	-1.38	FGF17
ILMN_1797519	0.00181	0.000106	-1.38	DLK1
ILMN_1690040	0.000189	6.67e-06	-1.39	TM7SF2
ILMN_3242067	5.39e-05	1.44e-06	-1.39	SNORA58
ILMN_3245893	0.00382	0.000263	-1.39	SNORA1
ILMN_1705116	0.000348	1.41e-05	-1.39	SLC22A23
ILMN_1766264	0.0152	0.00148	-1.39	PI16
ILMN_1742993	2.87e-05	6.71e-07	-1.39	PDX1
ILMN_1770102	5.88e-05	1.59e-06	-1.39	MAGIX
ILMN_1701052	0.000102	3.14e-06	-1.4	TUBG2
ILMN_2395506	6.72e-07	7.72e-09	-1.4	SOX6
ILMN_1661939	5.7e-05	1.54e-06	-1.4	SGSM1
ILMN_1708328	5.02e-06	8.33e-08	-1.4	RAB11FIP3
ILMN_1779633	1.83e-11	4.33e-14	-1.4	PSMD6
ILMN_1655913	8.87e-09	4.92e-11	-1.4	NUCB2
ILMN_1774565	1.24e-08	7.5e-11	-1.4	KAAG1
ILMN_1688877	0.000269	1.04e-05	-1.4	DIRAS3
ILMN_1805823	2.68e-09	1.29e-11	-1.4	BANF2
ILMN_1681103	0.000211	7.7e-06	-1.4	AQP1
ILMN_1719143	3.23e-05	7.78e-07	-1.4	APOBEC2
ILMN_1752214	0.00641	0.000499	-1.41	UGT2B17
ILMN_3237615	0.00264	0.000169	-1.41	SNORD88C
ILMN_2372698	7.15e-08	5.46e-10	-1.41	RGN
ILMN_1656837	1.93e-07	1.75e-09	-1.41	RBP1
ILMN_3249216	0.000531	2.37e-05	-1.41	PDX1
ILMN_1737418	0.00019	6.72e-06	-1.41	ACSL6
ILMN_3244449	0.0166	0.00165	-1.42	SNORD9
ILMN_2333670	3.08e-06	4.73e-08	-1.42	RNASE1
ILMN_1704656	6.09e-11	1.71e-13	-1.42	PPP2R1B
ILMN_1735779	0.00854	0.000714	-1.42	KCNJ8
ILMN_2405400	0.000147	4.91e-06	-1.42	GRK4
ILMN_1814204	0.00507	0.000375	-1.42	DNAJC28
ILMN_1812073	0.000226	8.37e-06	-1.42	ATP6V1B1
ILMN_1682459	0.00145	8.01e-05	-1.43	TUBB4A
ILMN_1667288	3.69e-06	5.84e-08	-1.43	SNORD73A
ILMN_3238785	0.00178	0.000104	-1.43	SNHG9
ILMN_1661491	0.00601	0.00046	-1.43	SH3GL2
ILMN_1666776	5.58e-05	1.5e-06	-1.43	KCNQ2
ILMN_1706031	6.84e-06	1.2e-07	-1.43	KANK1
ILMN_3242248	3.31e-07	3.26e-09	-1.43	FAM160A1
ILMN_2403237	0.0028	0.000182	-1.43	CHN2
ILMN_1778358	7.79e-05	2.23e-06	-1.43	ATP8A1
ILMN_2067520	0.000242	9.11e-06	-1.44	SNORD116-4
ILMN_3242825	0.000197	7.04e-06	-1.44	SNORA50A
ILMN_2096747	8.64e-06	1.59e-07	-1.44	SNORA33
ILMN_1667947	0.000603	2.76e-05	-1.44	NPY1R
ILMN_3309529	0.00211	0.000127	-1.44	MIR2276
ILMN_1668052	0.00434	0.000309	-1.44	FOXA2
ILMN_1677680	8.74e-05	2.6e-06	-1.44	FGF12
ILMN_1778352	2.3e-05	5.09e-07	-1.44	ABCC6
ILMN_2197365	3.79e-05	9.51e-07	-1.45	RGS2
ILMN_1716843	5.93e-05	1.61e-06	-1.45	ELOVL2
ILMN_2283398	0.00216	0.000131	-1.45	DUSP4
ILMN_1665437	1.13e-06	1.44e-08	-1.45	CYP2E1
ILMN_1791346	0.000775	3.73e-05	-1.45	ATF3
ILMN_1806310	1.49e-05	3.03e-07	-1.45	A1CF
ILMN_3243667	4.51e-10	1.58e-12	-1.46	SNORA71B
ILMN_3240116	3.71e-07	3.74e-09	-1.46	SNORA59A
ILMN_2405353	1.06e-06	1.33e-08	-1.46	SDK1
ILMN_2301722	0.000885	4.4e-05	-1.46	PDE8B
ILMN_1668469	4.08e-10	1.41e-12	-1.46	KIAA0922
ILMN_2407564	0.000192	6.82e-06	-1.46	ADGRV1
ILMN_2399463	0.0387	0.00493	-1.47	VAV3
ILMN_3242908	0.00163	9.22e-05	-1.47	SNORD117
ILMN_3246935	0.0121	0.00111	-1.47	SNORA74B
ILMN_3243129	0.0176	0.00179	-1.47	SNORA17A
ILMN_2074801	5.95e-05	1.62e-06	-1.47	RGL3
ILMN_2077680	2.16e-05	4.71e-07	-1.47	CLDND2
ILMN_1760246	0.000226	8.4e-06	-1.47	BSN
ILMN_2121774	0.000746	3.56e-05	-1.48	ZG16
ILMN_1750496	0.00211	0.000127	-1.48	ZBTB16
ILMN_1714859	0.00291	0.000191	-1.48	TCIRG1
ILMN_1653927	0.00287	0.000187	-1.48	SNORD83A
ILMN_3243894	0.000364	1.5e-05	-1.48	SNORA60
ILMN_1682038	0.00236	0.000147	-1.48	SNORA25
ILMN_2136068	8.87e-07	1.1e-08	-1.48	SEC63
ILMN_2275399	0.000207	7.53e-06	-1.48	RORC
ILMN_1661577	0.000108	3.4e-06	-1.48	MAFA
ILMN_1663561	0.000964	4.88e-05	-1.48	HNF1B
ILMN_2292187	7.12e-07	8.28e-09	-1.48	CHN2
ILMN_1676631	0.0163	0.00161	-1.48	CCNO
ILMN_1682989	9.73e-06	1.82e-07	-1.48	ADAMTS17
ILMN_1718950	1.65e-05	3.44e-07	-1.49	ZNF433
ILMN_1685709	0.00226	0.000139	-1.49	TMEM125
ILMN_1750912	3.95e-06	6.3e-08	-1.49	STXBP6
ILMN_1656904	8.54e-05	2.52e-06	-1.49	SLC1A4
ILMN_1745151	0.00152	8.48e-05	-1.49	SHANK2
ILMN_1768099	0.000708	3.34e-05	-1.49	SCGB1C1
ILMN_3237446	2.52e-05	5.69e-07	-1.49	SCARNA16
ILMN_1744968	0.000756	3.62e-05	-1.49	KCNAB1
ILMN_1765954	0.000461	1.99e-05	-1.49	HSD17B3
ILMN_1806667	0.000846	4.16e-05	-1.49	FRAS1
ILMN_1786278	5.43e-06	9.2e-08	-1.49	FAM149A
ILMN_1736752	2.66e-07	2.53e-09	-1.49	COMTD1
ILMN_1752899	2.06e-05	4.46e-07	-1.49	BCL11A
ILMN_1788394	3.27e-06	5.06e-08	-1.5	TTLL6
ILMN_3249543	0.00469	0.000341	-1.5	SNORD125
ILMN_3247494	0.00745	0.000599	-1.5	SNORA36B
ILMN_1662587	2.31e-05	5.11e-07	-1.5	PNPLA7
ILMN_1696035	4.55e-07	4.84e-09	-1.5	ERP29
ILMN_3251625	1.94e-05	4.18e-07	-1.51	ZNF503
ILMN_1802292	1.68e-07	1.49e-09	-1.51	WDFY2
ILMN_3241798	0.00641	0.000499	-1.51	SNORA41
ILMN_2303912	6.8e-08	5.16e-10	-1.51	SCD5
ILMN_1810560	1.46e-11	3.3e-14	-1.51	NUPR1
ILMN_2411236	2.39e-07	2.23e-09	-1.51	NRCAM
ILMN_1692280	0.0213	0.00225	-1.51	NKX2-2
ILMN_3308010	2.22e-05	4.87e-07	-1.51	MIR770
ILMN_1688642	0.00217	0.000132	-1.51	LAMC3
ILMN_2233604	5.41e-06	9.15e-08	-1.51	ECSIT
ILMN_1745623	4e-05	1.02e-06	-1.51	CRACR2B
ILMN_1771043	1.51e-06	2.05e-08	-1.51	CBFA2T3
ILMN_1770085	8.24e-08	6.51e-10	-1.51	BTG2
ILMN_1810875	1.63e-05	3.37e-07	-1.52	SYNGR1
ILMN_1709604	0.00249	0.000157	-1.52	SNORA64
ILMN_3238745	0.000203	7.3e-06	-1.52	SNORA55
ILMN_2370099	3.75e-07	3.78e-09	-1.52	MATN4
ILMN_1675268	1.84e-05	3.88e-07	-1.52	LRP4
ILMN_2396903	4.12e-06	6.62e-08	-1.52	KCNJ15
ILMN_1683786	6.57e-07	7.48e-09	-1.52	FYTTD1
ILMN_1712506	0.000798	3.86e-05	-1.52	DPP6
ILMN_2357542	0.00925	0.000786	-1.53	VIP
ILMN_1697301	4.38e-05	1.13e-06	-1.53	ST8SIA3
ILMN_3247251	3.15e-07	3.08e-09	-1.53	SNORA59B
ILMN_1749114	0.000504	2.23e-05	-1.53	OTC
ILMN_1774110	0.000114	3.63e-06	-1.53	CHN2
ILMN_1784176	5.29e-06	8.91e-08	-1.53	ABCA5
ILMN_1744560	0.000269	1.04e-05	-1.54	ULK1
ILMN_3248874	7.63e-05	2.18e-06	-1.54	SNORD8
ILMN_1782938	1.85e-05	3.92e-07	-1.54	SLC16A10
ILMN_1699797	4.97e-07	5.4e-09	-1.54	HDLBP
ILMN_2373207	9.89e-08	8.04e-10	-1.54	ECE2
ILMN_2120555	2.75e-05	6.35e-07	-1.54	ADCY1
ILMN_3309689	2.96e-05	6.98e-07	-1.55	SNORD114-4
ILMN_2276461	5.4e-07	6.01e-09	-1.55	MAP2
ILMN_2105960	0.000258	9.88e-06	-1.55	KIF12
ILMN_1723123	1.51e-05	3.09e-07	-1.55	FGFR3
ILMN_1804005	0.000308	1.23e-05	-1.55	FBP2
ILMN_1802646	2.97e-06	4.5e-08	-1.55	EPHB6
ILMN_1687291	2.8e-09	1.36e-11	-1.55	CDNF
ILMN_1739162	9.74e-06	1.82e-07	-1.55	CALML6
ILMN_1651303	3.55e-05	8.7e-07	-1.55	ATP13A4
ILMN_2367300	5.03e-07	5.51e-09	-1.55	ANKEF1
ILMN_1815937	0.000117	3.72e-06	-1.56	TMEM184A
ILMN_3248440	0.00139	7.54e-05	-1.56	SNORA81
ILMN_1810540	7.92e-08	6.17e-10	-1.56	SDK1
ILMN_1687404	6.02e-05	1.65e-06	-1.56	HCN1
ILMN_2109371	4.12e-08	3.02e-10	-1.56	CALCB
ILMN_3245365	0.000281	1.1e-05	-1.57	SNORA6
ILMN_2399919	6.3e-05	1.74e-06	-1.57	MLXIPL
ILMN_3241005	1.66e-06	2.3e-08	-1.57	MFSD6L
ILMN_2103547	1.03e-11	2.25e-14	-1.57	GOLGA8B
ILMN_1660608	0.000275	1.07e-05	-1.57	GABRB3
ILMN_2168347	1.27e-07	1.09e-09	-1.57	EPOR
ILMN_1796337	0.0105	0.000926	-1.57	CXCL17
ILMN_1778121	2.17e-13	3.16e-16	-1.57	CALN1
ILMN_2413331	0.0249	0.00278	-1.58	TMEM107
ILMN_3245759	0.00148	8.2e-05	-1.58	SNORD92
[truncated: 449 more rows]
