# Supplementary material for: Bioinformatics Data Mining Repurposes the JAK2 (Janus Kinase 2) Inhibitor Fedratinib for Treating Pancreatic Ductal Adenocarcinoma by Reversing the KRAS (Kirsten Rat Sarcoma 2 Viral Oncogene Homolog)-Driven Gene Signature
Source: J Pers Med. 2020 Sep 16;10(3):130. doi: 10.3390/jpm10030130 (PMC7563462; doi:10.3390/jpm10030130)
Supplement: Supplementary file 1 [file jpm-10-00130-s001.zip › Table-S1.xlsx]

## Sheet: KRAS
Table S1. The correlation between KRAS mutation types and PDAC gene signature.
Sample ID	TCGA-FB-A78T-01	TCGA-IB-7886-01	TCGA-2J-AABF-01	TCGA-2L-AAQE-01	TCGA-2L-AAQJ-01	TCGA-3A-A9I7-01	TCGA-3A-A9IB-01	TCGA-3A-A9IU-01	TCGA-3A-A9IZ-01	TCGA-F2-A44G-01	TCGA-F2-A7TX-01	TCGA-FB-AAPQ-01	TCGA-FB-AAPY-01	TCGA-FB-AAQ1-01	TCGA-FB-AAQ2-01	TCGA-FB-AAQ3-01	TCGA-HV-A5A3-01	TCGA-HV-A5A6-01	TCGA-HV-A7OL-01	TCGA-HV-A7OP-01	TCGA-HV-AA8X-01	TCGA-HZ-7926-01	TCGA-HZ-8315-01	TCGA-HZ-A49G-01	TCGA-HZ-A49I-01	TCGA-HZ-A4BH-01	TCGA-HZ-A4BK-01	TCGA-HZ-A8P1-01	TCGA-IB-7646-01	TCGA-IB-7651-01	TCGA-IB-7893-01	TCGA-IB-8127-01	TCGA-IB-A5SO-01	TCGA-IB-A5SP-01	TCGA-IB-A5SS-01	TCGA-IB-A6UG-01	TCGA-IB-A7LX-01	TCGA-IB-A7M4-01	TCGA-IB-AAUM-01	TCGA-IB-AAUN-01	TCGA-IB-AAUO-01	TCGA-IB-AAUQ-01	TCGA-M8-A5N4-01	TCGA-OE-A75W-01	TCGA-S4-A8RO-01	TCGA-US-A779-01	TCGA-XN-A8T3-01	TCGA-2J-AAB1-01	TCGA-2J-AAB8-01
Protein Change	G12A/G13C	G12C	G12D	G12D	G12D	G12D	G12D	G12D	G12D	G12D	G12D	G12D	G12D	G12D	G12D	G12D	G12D	G12D	G12D	G12D	G12D	G12D	G12D	G12D	G12D	G12D	G12D	G12D	G12D	G12D	G12D	G12D	G12D	G12D	G12D	G12D	G12D	G12D	G12D	G12D	G12D	G12D	G12D	G12D	G12D	G12D	G12D	G12R	G12R
CEACAM5	-0.5152	2.3524	-0.353	0.957	1.3853	-0.5954	-0.5836	0.824	1.0694	-0.2553	0.2424	1.3805	-0.511	-0.6346	-0.6117	0.1595	1.2498	2.7404	2.1778	-0.6345	-0.0877	-0.2882	0.8762	-0.4566	-0.569	-0.0434	0.009	0.8266	-0.4531	-0.6087	-0.6097	0.4207	1.478	3.9167	-0.6318	-0.6152	0.4749	0.9293	-0.6073	-0.3909	-0.6075	-0.1772	-0.5215	0.6375	0.2109	-0.2856	-0.5651	0.4511	0.6131
SLC6A14	-0.3068	-0.0117	-0.3988	-0.6999	4.1284	-0.6798	-0.8571	1.7577	0.2148	0.744	0.3122	0.612	-0.7307	-0.8424	-0.6156	-0.2385	0.6154	-0.4275	0.4478	0.0901	0.7026	-0.8107	-0.7312	-0.2725	-0.4883	0.3343	-0.5942	-0.2813	0.8156	1.5951	-0.6699	-0.8064	0.3245	-0.1563	0.6286	-0.4761	-0.6405	0.5211	-0.4797	-0.1765	1.7388	-0.5088	3.1163	-0.4203	-0.4672	-0.1611	-0.9057	-0.4708	-0.7311
KRT19	0.5509	-0.5423	-0.3987	0.4899	1.4364	0.1941	1.3452	1.3857	-0.3467	0.0694	0.693	-0.0793	0.8181	2.4535	2.8395	1.5663	1.3354	0.3409	3.9699	0.3873	-0.5597	0.4444	-0.391	-0.3451	0.6213	-0.4398	0.4367	0.7237	0.1779	-0.7013	-0.3075	-0.0873	0.2192	1.0821	0.7175	-0.2118	3.0993	2.2145	-1.147	0.3338	1.6762	0.6333	1.4423	1.9061	0.5271	1.6915	-0.0867	1.2289	-0.3707
CTSE	2.5981	0.0451	0.8362	-0.2263	3.3871	-0.1377	-0.2026	-0.4994	-0.1136	1.2165	-0.9167	1.0266	0.7481	-0.9578	-0.2375	1.0446	-0.1103	-0.8151	0.743	1.1545	3.6379	-0.7022	-0.3707	-0.1975	1.6984	0.8065	0.1347	4.8186	0.0777	-0.0262	0.4538	-0.0432	0.8085	1.1176	-0.5879	-0.9607	-0.9616	-0.1428	0.1642	0.2649	-0.0085	-0.6331	1.5896	0.2958	1.0971	2.3537	-0.8776	2.4499	0.7472
CEACAM6	0.6616	1.3443	0.0628	1.3588	2.8413	-0.9363	-0.9339	0.567	0.0143	0.9969	-0.265	0.5009	0.1592	-1.2146	-1.165	0.4044	1.3223	1.7348	1.6545	-1.2579	2.0908	-0.2702	2.2514	0.5965	-0.9601	0.4158	1.0272	1.9364	0.1858	-0.8355	-1.0055	0.5843	1.9989	3.7333	-0.465	-0.9409	-0.1395	0.5613	-0.8073	0.0861	-0.759	-0.1009	1.3043	0.6658	-0.0483	0.6757	-1.1952	2.6021	1.1645
SERPINB5	0.1977	0.8977	-0.3694	0.1606	0.2997	0.4063	0.7681	1.0341	-0.088	0.682	0.0723	0.206	-0.1183	0.2122	5.1541	0.23	0.969	-0.2732	1.1365	-0.6928	1.3013	-0.4715	1.6798	-0.1434	-0.0001	5.4006	-0.2616	0.7823	1.6274	3.2382	0.6314	2.4304	1.2785	0.5761	1.5361	0.1587	6.0311	7.7838	-0.6473	1.0086	0.8401	0.8926	-0.2088	0.3174	0.9898	1.5513	0.5331	3.134	-0.0626
CST1	0.3601	-0.3606	-0.6772	0.5569	-0.1259	-0.588	-0.3982	-0.7928	-0.7801	-0.2797	-0.8396	-0.6613	3.5956	-0.7838	-0.4586	2.5372	-0.0759	1.8433	1.066	-0.7473	0.7968	-0.367	0.5709	-0.4335	-0.7292	-0.1881	0.5409	0.1395	0.9234	0.8265	-0.8276	0.4671	0.2533	-0.5915	-0.6644	-0.8174	0.1295	-0.7351	0.0477	0.2026	-0.7941	0.6185	0.0105	5.3374	-0.5787	-0.4863	-0.8474	0.7155	-0.5723
TFF1	0.2228	-0.1251	-0.1407	-0.4264	0.2114	-0.6331	-0.6106	-0.6158	-0.6613	0.6005	-0.7	3.2262	0.311	-0.6685	-0.6857	0.192	-0.0641	-0.601	1.9958	3.2597	0.1468	-0.4786	-0.5559	-0.3931	-0.036	-0.4787	-0.5521	0.6461	-0.6969	-0.5789	-0.6815	-0.6449	0.6454	1.2661	-0.6942	-0.669	-0.6841	1.0741	-0.3144	-0.2874	-0.5642	-0.5427	-0.3078	1.2717	-0.1943	0.9674	-0.6964	1.1183	-0.0531
TMPRSS4	-0.1758	1.0142	-0.6928	1.8584	2.2296	-0.2467	-0.442	1.6699	2.0289	0.6984	-0.376	2.7929	-0.0216	0.0052	-0.6058	0.7382	1.737	0.2744	1.1175	-1.0102	0.4538	0.1451	-0.1808	-0.0895	0.9566	0.3246	0.068	0.7354	0.4739	0.2131	-0.9898	-0.781	0.5766	2.6892	0.6442	-1.1814	0.9562	1.1834	-0.9313	0.7572	0.31	-1.1868	0.9389	0.9328	0.1093	2.4129	-0.8454	1.1114	-0.253
LAMB3	0.266	-0.0954	-0.0804	0.0437	1.1711	0.3738	0.6551	0.1595	1.1225	1.1606	-0.1561	2.2497	0.0092	0.3601	2.5633	-0.7606	2.7547	-0.1282	1.5424	-0.3634	-0.0702	0.6793	-0.5374	-0.4766	1.3642	1.8448	0.2705	-0.2124	2.9042	-0.3799	-0.3214	0.3782	0.4004	-0.1847	0.7033	1.0947	1.9691	0.1078	-0.9093	0.0824	0.7825	0.6405	1.7661	1.0185	2.677	-0.057	-0.3073	0.3697	-0.2959
LCN2	-0.2571	-0.4535	-0.34	0.2704	1.0848	-0.102	-0.7889	0.4997	1.5606	0.2768	-0.096	1.4006	-0.2748	0.2225	-0.6362	1.5439	-0.4422	-0.4453	-0.3388	1.0727	-0.0724	-0.4839	0.0295	-0.6759	2.1253	-0.6555	-0.2282	-0.6736	-0.3961	-0.8361	-0.7116	-0.4857	-0.3089	1.2225	0.5329	0.1388	-0.5266	-0.4573	-0.1496	-0.4294	-0.3877	0.164	-0.6661	-0.2446	-0.5958	-0.1344	-0.541	-0.3001	0.2463
LAMC2	-0.1445	-0.3525	0.9271	-0.0077	0.7114	0.0736	0.9129	1.5626	1.7682	-0.1175	0.3813	0.0646	-0.3754	0.8637	5.1996	-0.375	1.1475	0.1567	-0.4122	-0.7397	-0.3082	0.7416	-0.0685	-0.1136	1.4336	1.5987	-0.0538	-0.5076	1.4106	-0.0342	2.347	0.8549	-0.514	-0.7309	0.838	0.2172	2.8294	0.0164	-0.5726	0.3186	0.9472	0.5854	1.309	-0.683	1.7993	-0.4732	-0.1357	-0.0409	-0.2152
MMP11	-0.5268	-0.0585	-0.4633	0.3719	-0.1481	1.6553	0.206	-0.0167	-0.6378	1.4493	-0.5239	-0.5251	0.2018	-0.5939	-0.3001	1.4184	-0.0384	0.1608	1.7603	-0.7255	0.0483	-0.5031	0.2395	-0.2783	-0.2073	-0.1821	0.1883	-0.4832	-0.3737	-0.2871	0.6807	-0.1172	0.2977	-0.643	3.6654	-0.5909	-0.1279	-0.5604	-0.3814	0.8715	0.7183	0.8706	1.0981	0.6301	-0.2144	-0.3938	0.5003	-0.063	1.2507
DPCR1	0.2842	-0.6043	-0.2501	-0.5843	1.494	-0.4324	-0.3633	-0.5516	0.1321	-0.3675	-0.5596	0.4156	-0.4113	-0.6179	-0.4321	0.3278	-0.2223	-0.6321	-0.5099	-0.6249	-0.1222	0.3915	-0.2467	-0.5586	2.3169	0.1825	-0.3041	-0.1356	-0.5543	-0.394	-0.6188	-0.5556	1.14	1.4689	-0.6306	-0.2435	-0.6073	-0.5568	-0.5186	0.4275	-0.5779	-0.2713	-0.0708	0.9551	0.6871	0.5843	-0.6286	4.1159	-0.442
KRT7	-0.0008	-0.6039	-0.0641	2.0924	0.2237	0.2026	1.6665	1.0563	0.1526	0.2452	2.0616	-0.8597	0.4517	5.9771	2.2672	0.6424	2.0208	0.8485	2.3628	-0.604	-0.7909	0.6732	0.0007	-0.3745	-0.4745	0.9363	0.6291	-0.9908	2.1928	-0.4626	0.15	0.876	-0.2384	0.4462	2.8745	3.575	2.0342	2.3838	-0.9017	0.2226	3.0143	1.7501	1.2238	0.2333	0.7919	1.3393	1.1822	0.3452	-0.6308
KRT17	-0.4313	-0.5237	-0.1528	-0.2814	-0.199	0.3033	-0.1872	-0.1074	-0.2747	-0.4966	-0.0875	-0.2755	-0.3403	0.3184	2.5001	-0.1467	0.125	-0.0527	0.0574	-0.5915	-0.3374	-0.3013	-0.0647	-0.3304	1.3943	0.4644	-0.4631	-0.5025	-0.3252	-0.4768	1.0888	-0.1884	0.469	-0.5156	0.4151	0.2404	1.4934	2.4873	-0.5184	-0.4685	4.8953	3.8271	-0.1269	-0.1856	-0.0601	0.4083	0.2063	-0.091	-0.3723
TRIM29	-0.8941	-0.1519	-0.7906	1.1453	1.4632	0.505	-0.4798	0.6507	-0.6078	0.3543	-0.6537	-0.5412	-0.2436	1.8981	3.5203	0.4225	-0.2121	-0.2492	1.9757	-0.6619	1.384	-0.4215	0.0827	0.0442	0.1789	2.3219	-0.7019	-0.9998	1.0292	-0.7007	-0.8678	0.0045	0.7879	2.5024	-0.2451	-0.6429	0.6429	3.3765	-0.8852	1.3439	0.9345	1.6761	0.6471	0.8421	-0.3531	2.006	-0.9924	1.4441	0.0601
GPRC5A	1.1296	-0.2713	0.0869	1.9332	0.1603	-0.1612	-0.3885	1.1419	3.3058	1.1253	0.9818	-0.2616	0.0113	-0.1563	0.7223	-0.1349	0.9544	1.2774	1.4677	-0.8761	-0.7913	0.1771	1.1355	-0.3997	-0.6876	-0.8516	0.2187	-0.0474	1.2245	0.1018	-0.832	1.5202	0.696	-0.4274	1.6221	0.4904	0.8794	0.171	-0.8564	0.4625	0.5427	-0.5108	1.035	-0.0871	1.8237	0.8065	-0.6842	2.2153	0.7353
SDR16C5	0.2507	2.7583	0.3298	0.628	3.5508	-0.6889	0.2546	-0.3081	1.8053	1.964	-0.415	1.9945	0.1104	-0.6146	0.1779	1.154	0.2648	3.0201	2.2231	-1.1974	1.3066	0.1477	-0.7137	-0.5456	0.0831	-0.3811	-0.2797	1.3525	1.1458	0.3006	-0.5992	0.2131	1.0329	2.925	-0.0094	-0.7626	0.2302	-0.4029	-0.6611	2.6993	0.2789	-0.8901	3.0642	-0.27	-0.2308	0.5716	-0.8705	1.5169	0.8159
AGR2	0.4284	0.7122	0.3987	-0.1594	0.1457	-0.1834	-0.4889	-0.3986	1.4244	-0.1346	-0.6763	1.0433	0.4265	-0.6804	-0.6704	-0.2144	-0.1169	0.2465	0.4597	1.518	0.6921	0.2854	-0.3012	-0.4919	0.4502	-0.39	0.0404	2.5162	0.0853	-0.7395	-0.8157	-0.5051	0.3282	2.1826	-0.5001	-0.6646	-0.5979	0.3855	-0.271	-0.3661	-0.5812	-0.2697	-0.5646	0.268	0.1359	0.7283	-0.7848	0.388	0.4138
ANXA10	3.3045	-0.2555	0.1915	-0.4618	0.9445	-0.1486	-0.0903	-0.6063	0.2669	0.9715	-0.8253	2.4443	1.0321	-0.82	-0.8072	1.2682	0.0663	-0.8299	0.9405	-0.8503	-0.1549	-0.4871	-0.5806	-0.6335	0.1028	-0.66	0.2396	1.6395	-0.7686	-0.6323	-0.2999	0.0991	-0.1264	1.0404	-0.6458	-0.8141	-0.7912	0.1137	-0.2614	-0.4226	-0.6179	-0.8378	0.3195	0.094	3.2868	1.1996	-0.8399	0.6287	-0.5795
SLPI	-0.4367	-0.46	-0.0425	0.7931	-0.1739	-0.7218	-0.1751	1.8646	0.2128	0.9335	-0.5768	0.1397	1.2911	0.4663	1.6153	2.4539	1.8999	-0.4341	1.4407	7.8281	-0.1983	0.7522	-0.3372	-0.4515	0.8061	-0.5346	0.2879	-0.3289	-0.6434	-0.853	-0.321	-0.59	-0.0308	1.4344	0.2062	-0.6424	-0.0712	1.2073	-0.535	-0.3964	1.2612	1.2252	0.037	0.0846	-0.1367	0.545	-0.4362	0.2566	-0.2321
NQO1	0.8682	0.7888	0.267	-0.5861	2.3566	-0.476	-0.7912	-0.3512	1.4916	0.0528	-0.6854	2.5779	1.1565	0.906	0.4271	2.2868	-0.0135	-0.0965	1.2039	3.1635	3.6061	0.406	-0.2235	-0.7995	0.6419	0.3684	0.997	3.2324	0.5373	-0.0457	-0.411	0.5061	-0.1738	2.8774	0.1391	-1.111	-0.4769	-0.6391	-0.8035	-0.255	0.3664	-0.9637	0.3203	1.1257	0.3267	1.2096	-0.968	1.714	1.1525
AHNAK2	0.2067	0.5929	-0.5669	1.2273	1.2266	0.2033	0.9177	1.342	-0.6433	1.347	0.6386	0.1474	-0.4024	0.2264	1.969	-0.1378	4.0605	-0.2573	-0.4743	-1.2658	1.6438	-0.4229	0.2338	-0.2196	0.4173	-0.6851	0.6164	-0.2919	-0.008	1.1521	1.6307	1.7272	0.0234	-0.5047	0.6445	2.1466	2.0752	-0.0412	-1.0488	1.0379	0.4217	1.4425	1.4509	1.049	1.395	1.344	0.6019	0.6456	0.0804
GCNT3	2.8178	2.2087	-0.0806	-0.4391	2.176	-0.384	-0.9019	-0.4465	1.1881	0.3258	-0.648	1.2176	0.1817	-0.7203	-0.8807	-0.4376	0.019	-0.3675	-0.3389	-0.942	1.0914	0.3158	-0.225	-0.4244	-0.2304	-0.7187	1.7026	2.0844	2.9216	0.3485	-0.9368	0.4412	0.8271	0.5091	-0.6864	-0.6788	-0.5253	0.1286	-0.1282	0.0445	-0.3543	-0.2285	0.1301	-0.237	-0.2473	-0.3978	-0.9534	0.5131	0.288
TMC5	1.1187	1.3658	-0.1506	0.084	2.8394	-0.3219	0.1779	-0.3459	3.1336	1.382	-0.4304	3.0506	0.3528	-0.2622	-1.0722	0.0998	0.5653	1.2293	0.154	1.0608	1.9521	1.2513	-0.1316	-0.4967	0.0448	-0.9524	0.2634	1.7205	-0.0085	0.5559	-0.8305	0.2332	0.319	0.721	0.1023	-0.7052	-0.8213	-0.1547	-0.4803	-0.2066	-0.4595	-0.4169	1.7966	0.1428	-0.0905	-0.1514	-1.0275	0.4148	0.207
ITGA2	-0.5325	0.9896	-0.2446	0.5956	1.1984	-0.6705	0.6511	0.2643	0.7216	1.1604	0.3977	0.4727	-0.7967	0.2985	0.5244	-0.8738	3.2571	0.3687	-0.9686	-1.3897	-0.2061	4.9424	0.4534	-0.3981	1.293	0.183	0.8117	-0.6326	2.9084	2.2084	-0.2885	0.5325	-0.0381	-0.4765	0.6069	0.1096	1.346	0.0351	-1.0266	-0.3161	-0.4518	-0.4418	2.2608	-1.0952	-0.214	-1.0098	-0.9051	-0.426	0.1176
FXYD3	0.485	0.7722	-0.1286	0.8241	0.3369	-0.6184	-0.2894	1.346	2.3096	0.2794	-0.0307	-0.469	3.0529	-0.1945	0.8799	3.0626	1.2072	1.9163	6.7059	6.2972	0.8143	-0.6471	-0.1412	-0.281	0.4437	-0.2948	-0.022	0.4519	0.1348	-0.3369	1.2468	-0.4706	0.0659	1.8577	1.4519	-0.8438	-0.3946	1.4959	-0.6527	-0.2977	1.2116	-0.5913	0.6227	1.948	-0.056	1.2389	-0.9389	0.919	0.0178
GPX2	1.5959	-0.4452	-0.0566	-0.5537	1.7523	-0.8077	-0.8944	-0.9293	0.9313	0.5599	-0.9875	3.2161	1.5119	-0.5241	-0.8239	1.1804	-0.6002	-0.4551	2.1391	2.5145	2.1885	0.4733	-0.4932	-0.6722	-0.1653	-0.296	-0.1311	1.913	-0.3674	1.2846	-0.6558	-0.4685	-0.7572	3.3626	-0.851	-0.9429	-1.0149	-0.119	-0.5389	-0.8998	-0.1586	-0.6415	-0.3698	0.5959	-0.5026	1.7643	-1.0301	1.2268	0.3396
LAMA3	-0.4011	1.6555	0.2684	0.4474	0.4685	0.1905	0.5418	-0.6074	0.3891	0.229	0.628	0.5029	2.0955	0.5661	3.8134	0.1341	0.6955	0.0226	-0.5091	-0.879	-0.1029	1.201	-0.0786	-0.0816	0.8304	1.2084	-0.2421	-0.2451	0.7577	-0.0925	0.409	1.6028	0.0851	-0.1748	0.3613	-0.3099	1.9555	0.1902	-0.6655	0.7723	0.3065	0.2807	0.9563	-0.5502	0.4293	-0.1487	0.0024	0.5811	0.015
TOP2A	-0.2088	0.1546	0.9357	-0.7883	0.5476	-0.5851	0.4193	0.1694	2.4057	1.1027	2.1281	-0.4246	-0.8654	1.0523	2.618	0.8845	-0.0841	0.7491	-0.4139	-0.7688	-0.2718	0.0807	-0.5053	-0.7599	-1.1482	-0.2449	-0.3484	0.3081	4.6002	-0.0354	4.3726	0.3453	-0.2608	-0.3386	0.8052	-0.5128	2.0159	1.986	-1.2725	1.8305	0.3527	-0.2239	-0.0365	-0.5302	1.7954	-0.8171	0.863	-0.6142	0.9688
CDH3	-0.31	0.222	0.0265	-0.0375	0.3705	-0.3784	3.9273	0.8727	2.3858	2.966	-0.0462	-0.7435	-0.0193	1.0388	2.2193	-0.286	3.5665	1.2949	2.5519	-0.5151	-0.369	-0.2511	0.4648	0.3277	-0.1864	1.369	0.0764	-1.1549	0.3373	0.7207	1.4457	1.2099	-0.4571	0.9634	2.2647	-0.523	0.7496	2.1792	-0.8265	-0.0021	2.2734	1.2258	5.339	-0.3299	0.1757	-0.0061	0.2288	0.0665	-0.0608
IFI27	-0.1887	0.1124	0.1634	1.4876	0.4	-0.1515	0.4811	-0.6139	-0.5256	-0.4195	0.0526	-0.2373	1.0881	-0.4319	-0.0195	6.163	-0.2472	0.1582	4.5885	-0.1168	2.3488	-0.2112	-0.3921	-0.4021	1.6663	0.6462	0.4604	-0.6557	1.3327	-0.0329	-0.1425	1.0604	1.2269	0.4996	0.9948	-0.6086	-0.2686	0.4288	-0.702	-0.3718	2.6692	0.5956	0.8869	1.441	1.175	0.3905	-0.6011	0.511	0.2495
SLC44A4	1.4782	0.0355	0.4672	-0.3306	0.8361	-0.5846	-0.5873	0.025	1.4411	0.4188	-1.0563	3.0007	0.8133	-0.3403	-1.0321	0.2309	0.9546	0.0776	0.3466	0.6541	1.4429	1.81	-0.694	-0.3444	0.5908	-0.0612	0.3167	1.9851	-0.5393	-0.589	-1.1989	-0.0533	0.3232	1.5259	-0.8989	-1.0748	-0.2694	-0.052	-0.5148	1.1167	-0.4724	-0.521	1.3228	0.8905	-0.3491	0.8143	-0.2117	0.5449	-0.1493
ANO1	-0.7377	1.8354	1.5234	1.1407	2.6888	0.394	0.1678	0.4714	-0.4325	-0.4136	0.2853	-0.5593	-1.0576	-0.2233	3.0527	0.231	-0.2739	-0.7343	-0.3165	-1.0217	0.0068	1.1533	0.506	0.5192	-0.6375	1.7567	-0.6216	0.0374	0.1142	0.0045	-0.1981	1.3391	0.1716	0.6229	1.0586	-0.541	4.5421	-0.0832	-0.8657	4.0657	0.5727	0.0904	0.8384	-0.4392	0.6486	0.5065	-0.0048	0.7012	1.0095
CEACAM1	0.0166	2.3675	0.1661	1.1	1.7301	-0.4301	-0.1059	9.7647	1.5555	-0.2239	2.8239	1.1742	0.873	-0.7334	-0.3354	-0.1041	2.3007	0.576	0.9672	1.5316	0.516	0.9189	0.9596	-0.0106	-0.2992	0.473	0.1577	0.1625	-0.5857	-0.236	-0.1259	0.3607	-0.1446	1.4332	-0.8573	-0.8311	0.3504	2.7163	-0.853	0.3032	-0.5004	0.0753	0.1725	-0.1466	0.1765	-0.4335	-0.5455	0.2823	-0.5038
TMEM45B	-0.4906	4.418	-0.1258	0.8239	1.108	1.12	-1.0048	-0.7362	1.7799	0.9117	-0.31	1.8935	0.8135	-0.9292	-0.9264	0.2846	-0.2753	-0.4369	0.966	1.638	2.5009	2.6499	0.3284	-0.3828	-0.7434	0.024	0.6369	3.1554	-0.4227	1.142	-0.8976	0.9235	0.467	3.4839	-0.8623	-0.8022	-0.7662	0.7733	-1.0115	-0.8515	-0.5673	0.074	0.4216	0.2069	-0.5781	-0.0574	-1.1949	0.2982	-0.3206
ANLN	-0.4875	0.5207	0.9504	-0.0054	0.0672	-0.1031	0.5055	0.331	4.0612	1.7019	4.5369	0.002	-0.7358	4.393	4.7562	-0.333	-0.4789	2.9402	-0.4051	-1.1819	0.7134	0.5975	-0.3586	-0.6032	-0.8182	0.3942	-0.4301	0.1735	6.1303	0.1555	4.6933	-0.1332	-0.4651	-0.2885	1.9371	0.4286	3.7655	0.2893	-1.0184	3.0135	0.3041	0.8243	0.4991	-0.6301	2.5088	-0.7675	1.0889	-0.0101	0.832
TSPAN8	0.7099	0.5211	-0.1893	-0.7669	2.4859	0.8899	-0.6081	-0.695	0.2717	1.4208	-0.8978	0.2752	-0.1439	-0.4461	-1.1045	3.0462	-0.6325	-0.2823	1.8072	-1.2087	0.4498	0.0744	0.4451	-0.357	1.591	0.0835	0.4656	1.4899	-0.7677	2.3059	-0.8886	0.677	-0.0841	0.3432	-0.3658	-1.1005	-0.9304	-0.667	-0.6144	-0.447	-0.0222	-0.4023	0.0813	1.421	0.4457	1.5277	-1.0403	1.8022	0.1667
ADAMTS12	-0.8484	1.2904	0.1044	-0.6454	-0.6229	0.3714	0.0781	-0.0805	0.6792	-0.1108	-0.0567	-0.5492	-0.6127	-0.8241	-0.7223	-0.83	-0.6362	-0.6196	-0.8774	-0.9877	-0.7946	-0.2137	0.3018	-0.4645	-0.7658	-0.1481	-0.3121	-0.8493	2.8403	1.6508	6.2846	0.668	0.0401	-0.8676	2.3155	-0.5832	-0.5117	-0.7234	-0.5862	0.1755	-0.8401	-0.2856	-0.1219	-0.6579	-0.5528	-0.974	0.053	-0.5195	0.5115
ECT2	-0.5615	0.0935	0.4644	0.0262	-0.0013	-0.2704	1.3998	-0.3465	3.4943	1.5348	1.1832	0.219	-1.1514	0.5547	2.3682	0.3799	-0.5124	1.4908	-0.3717	-0.6889	0.8425	0.9174	-0.3932	-0.2803	0.0107	2.5284	-0.5886	-0.5176	4.8392	0.6777	2.4097	0.258	-0.2389	-0.1827	0.0628	-0.3069	0.537	0.8633	-1.0829	1.3369	4.32	0.5547	1.1975	-0.9167	1.5911	-0.7199	-0.4685	-0.1433	3.3853
ITGB4	0.8179	-0.4008	-0.2147	-0.1165	2.9247	0.7215	0.4233	1.9851	0.549	0.9489	0.6712	0.3527	-0.2767	0.5666	3.6802	-0.9443	0.505	-0.1071	0.5307	1.1889	0.557	0.6802	-0.406	0.0477	1.1776	-0.3096	-0.1855	0.7427	-0.3056	-0.6612	-0.114	-0.576	-0.0555	-0.3191	1.1891	0.6195	2.9797	0.9785	-0.8408	0.5416	1.7609	0.1538	2.7167	-0.2762	1.4766	0.1384	-0.1503	1.2027	-0.6078
PLEK2	0.6231	0.6238	-0.6252	0.4853	1.7282	-0.0428	0.6137	-0.6381	0.7564	0.1875	-0.2427	1.4851	0.0993	-0.0199	1.0019	1.709	-0.0478	-0.1499	2.3041	-0.8705	0.6429	0.2929	-0.0378	-0.4566	1.1399	0.7511	1.0193	1.9515	0.4432	-0.3134	-0.0809	0.9929	-0.3732	0.4446	0.763	-0.6726	0.8119	1.372	-0.7579	0.0559	0.2786	-0.0538	1.9796	2.2553	3.2832	1.4541	-0.4173	0.668	0.0397
STYK1	0.9499	-0.1562	0.1351	0.0076	0.9517	-0.356	-0.0782	2.0044	0.4536	0.3168	0.4624	1.5431	0.359	-0.1802	0.1863	0.5395	3.5472	-0.1647	1.4461	-1.005	0.2632	0.5713	1.2165	-0.1784	-0.6797	-0.9269	0.1122	3.5246	0.6276	-0.8659	-0.9854	0.8843	1.462	0.0989	0.2055	-0.778	2.7203	0.2948	-0.7014	-0.1995	0.2666	-0.9867	-0.1352	0.6874	0.0495	0.9274	-0.4646	-0.3401	0.0935
TRIM31	1.6645	1.0474	1.5452	0.0791	0.0199	-0.6497	-0.8133	0.0365	1.1441	-0.048	2.2324	5.7878	1.3657	-0.8149	-0.5693	2.5704	1.2916	0.8236	0.1791	-0.4743	0.5083	-0.6752	0.5108	0.1172	0.1677	1.0075	0.1336	2.0502	-0.2675	-0.1791	-0.926	0.249	-0.0237	2.7706	-0.5127	-0.9073	-0.0388	0.3737	-0.1814	-0.1857	-0.5828	-0.5735	0.5064	2.0164	0.1407	1.2754	-0.588	-0.1471	0.0623
EGLN3	-0.0557	-0.6204	-0.6099	-0.3082	-0.4075	-0.3595	1.1782	-0.2464	3.842	2.0542	-0.8173	3.7383	0.1846	-0.6784	-0.1439	0.0448	2.0496	-0.1394	-0.123	-0.7963	1.1176	0.0889	-0.5873	-0.0924	-0.5658	-0.2547	-0.5911	-0.2864	0.374	-0.1806	-0.2627	-0.0976	-0.5062	-0.5214	0.6538	-0.6157	-0.2185	-0.5021	-0.713	-0.3745	-0.4056	0.5816	0.2174	0.1377	2.7265	-0.1668	-0.355	-0.3224	-0.7212
CAPG	0.5789	0.1374	0.5153	0.1235	1.4682	-0.5008	1.196	2.0503	-1.0542	-0.379	0.1774	-0.3691	2.066	-0.1883	-0.2113	1.1905	0.191	-0.1842	3.3302	2.2658	0.3354	-0.3509	0.1249	0.2973	-0.4862	-0.2605	0.7883	1.7659	-0.2446	-0.7127	0.307	1.0018	-0.1936	0.4546	1.3444	-0.3732	-0.1824	-0.0449	-1.255	0.0903	1.2042	0.0826	0.7905	3.4848	-0.5422	1.2566	-0.2401	1.0235	-0.3362
ASPM	0.2944	0.4295	2.5479	0.0914	-0.2936	-0.0437	0.5247	0.5214	2.2652	0.5729	1.8541	-0.8627	-0.8028	1.6425	3.9216	-0.3013	-0.1855	0.4774	-0.335	-0.4747	0.8311	-0.0906	-0.4413	-0.6408	-1.0764	1.153	-0.0524	0.839	2.4418	-0.4215	3.6653	0.2528	-0.2444	-0.4484	0.9915	0.2311	1.3656	0.2432	-0.797	2.0796	0.3735	-0.0576	0.0265	-0.4407	1.1697	-0.7461	2.0221	-0.449	1.0897
FBXO32	-0.2962	-0.019	-0.5018	-0.0516	0.2932	-0.1126	1.1888	-0.1432	0.6589	0.273	-0.5142	0.2015	0.2206	-0.3881	0.7202	0.4156	1.2398	0.8036	-0.4936	-0.7118	-0.5358	0.0024	0.3016	-0.4546	-0.3045	-0.5874	-0.5152	-0.8139	1.6179	0.2495	0.2219	0.164	1.6756	-0.9075	0.2622	-0.4464	-0.0679	0.0103	-0.5617	-0.0595	-0.5389	0.8089	0.9974	0.4792	-0.2368	-0.4747	0.0562	-0.3545	-0.3163
ADAM9	-0.7445	0.8359	0.4944	-0.5917	1.1487	-0.1991	0.2942	1.7919	1.7757	0.9306	2.376	0.9692	-1.049	0.63	-0.5957	-0.7244	1.438	-0.7806	-0.7399	-1.4721	0.7431	1.182	0.6414	-0.3242	0.0672	-0.0974	-0.2845	-0.8785	4.1108	1.0033	3.0348	0.8347	-0.6239	1.1168	1.2612	-0.2197	-0.3941	-0.045	-0.9679	-0.2491	-0.6875	-0.7527	2.0515	-1.3527	2.5705	-0.5795	-0.0758	-0.3216	-0.6453
CENPF	0.4146	0.2566	2.1755	-0.055	0.0994	-0.2657	0.4003	0.6654	0.8043	1.5411	2.0215	-0.439	-0.5879	1.5733	4.9698	-0.3659	-0.1863	0.6711	-0.4344	-0.4591	1.7849	-0.1936	-0.6785	-0.6724	-0.9956	1.1333	-0.2765	1.0289	2.7193	-0.2768	2.2314	-0.0583	-0.2741	-0.4593	1.2665	0.4186	2.0683	0.1798	-0.8489	2.5586	0.4466	0.1225	-0.7284	-0.447	0.5378	-0.6248	1.8864	-0.3968	1.0209
FGD6	0.3508	1.3109	1.0897	0.196	1.6482	-0.1918	2.6308	0.219	1.4211	0.5616	1.5201	-0.5948	-0.5177	-0.3345	0.1312	-0.5387	1.1081	1.9187	-0.5157	-1.9003	-1.0172	1.7823	3.1596	-0.3027	-0.1857	1.2961	1.533	0.1209	0.9146	1.1019	0.8821	2.4117	-0.0594	-0.737	3.9878	1.1369	0.6906	-0.3889	-0.5721	-0.372	4.5253	0.0565	1.7379	-1.1201	0.5742	0.6722	-0.2578	0.294	-0.0637
ASAP2	0.8023	0.9711	-0.2919	1.1004	0.6753	-0.3003	0.1519	2.3401	0.6064	0.3895	0.3355	-0.7992	-0.4882	-0.5417	3.0679	0.1514	0.5922	0.5674	-0.8755	-1.4768	0.151	1.6891	0.9137	-0.0336	-0.4705	0.8319	-0.0036	0.8954	-0.2935	1.679	0.4217	0.7961	-0.1022	0.1742	1.6272	-0.1144	4.0139	-0.1965	-0.7819	2.2559	0.3144	-0.2969	1.2017	-1.1779	1.2353	0.6351	1.3282	0.7258	-0.2545
F8	-0.4085	-0.4157	-0.0624	-0.3046	-0.5638	-0.4017	-0.1688	-0.4082	-0.5317	-0.6013	-0.236	-0.4524	-0.5392	-0.4711	-0.1106	-0.5333	-0.7743	-0.5877	-0.7891	-0.8705	-0.4722	-0.1394	-0.1905	0.3201	-0.2648	-0.4305	-0.0982	-0.8243	0.3857	0.1812	-0.1449	-0.4086	0.0197	-0.5748	-0.3864	-0.4292	0.2347	-0.5283	1.1084	-0.0821	-0.2482	-0.3644	-0.5724	-0.7559	-0.6078	-0.5788	0.0041	-0.5979	-0.5224
BTG2	0.0681	0.341	-0.2157	-0.7711	-0.225	-0.5486	-0.6278	-0.4797	-0.7116	-0.5148	-0.5674	-0.4595	-0.321	-1.0356	-0.9916	-0.9604	-0.2756	-0.9323	-0.3158	-0.7114	-0.4074	-0.3116	0.2837	-0.4418	-0.0091	-0.2577	-0.5716	-0.6869	-0.5474	-0.6185	-0.6803	-0.7262	-0.2713	-0.3955	-0.983	0.0342	-0.9118	-0.8182	1.0517	-0.6537	-0.7039	-0.6909	-0.9802	-0.5632	-0.9728	-0.039	-0.8456	0.5925	0.0642
[truncated: 61 more columns]
